# Supplementary material for: Thermosensitive alternative splicing senses and mediates temperature adaptation in Drosophila
Source: eLife journal article supplement (doi:10.7554/elife.44642), 2019-11-08
Supplement: supp [file elife-44642-supp-v1.zip]

Archive with 19 entries (19 files):
- elife_poa_e44642_Figure_6_figure_supplement_2.pdf
- elife_poa_e44642_Supplementary_file_2.xlsx
- elife_poa_e44642_Supplementary_file_5.pdf
- elife_poa_e44642_Supplementary_file_4.xlsx
- elife_poa_e44642_Figure_4_figure_supplement_1.pdf
- elife_poa_e44642_Figure_3_figure_supplement_1.pdf
- elife_poa_e44642_Figure_6_figure_supplement_1.pdf
- elife_poa_e44642_Figure_2_figure_supplement_2.pdf
- elife_poa_e44642_Figure_2_figure_supplement_1.pdf
- elife_poa_e44642_Supplementary_file_3.xlsx
- elife_poa_e44642_Figure_1_figure_supplement_1.pdf
- elife_poa_e44642_Figure_8_figure_supplement_2.pdf
- elife_poa_e44642_Figure_5_figure_supplement_1.pdf
- elife_poa_e44642_Transparent_Reporting_File.pdf
- elife_poa_e44642_Figure_8_figure_supplement_1.pdf
- elife_poa_e44642_Supplementary_file_1.xlsx
- elife_poa_e44642_Figure_1_figure_supplement_2.pdf
- elife_poa_e44642_Figure_7_figure_supplement_1.pdf
- elife_poa_e44642_Figure_4_figure_supplement_2.pdf
