# Supplementary material for: Thermosensitive alternative splicing senses and mediates temperature adaptation in Drosophila
Source: eLife journal article supplement (doi:10.7554/elife.44642), 2019-11-08
Supplement: supp [file elife-44642-supp-v1.zip › elife_poa_e44642_Figure_1_figure_supplement_2.pdf]

A.

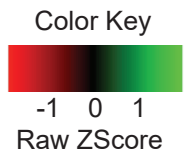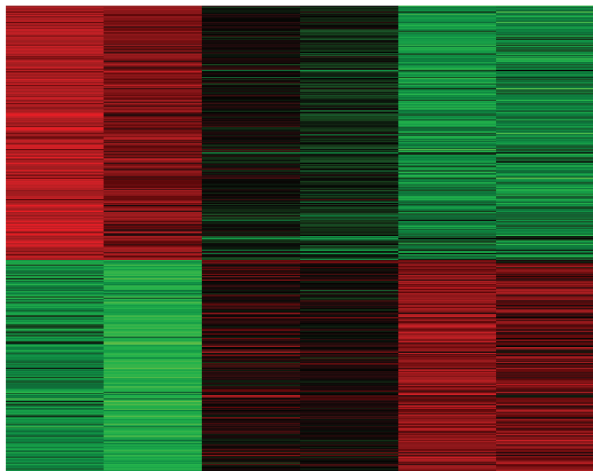

B.

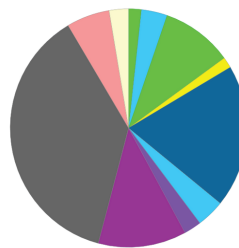

- apoptotic process (GO:0006915)
- biological adhesion (GO:0022610)
- biological regulation (GO:0065007)
- cellular component organization or biogenesis (GO:0071840)
- cellular process (GO:0009987)
- developmental process (GO:0032502)
- immune system process (GO:0002376)
- localization (GO:0051179)
- metabolic process (GO:0008152)
- multicellular organismal process (GO:0032501)
- response to stimulus (GO:0050896)
