# Supplementary material for: Thermosensitive alternative splicing senses and mediates temperature adaptation in Drosophila
Source: eLife journal article supplement (doi:10.7554/elife.44642), 2019-11-08
Supplement: supp [file elife-44642-supp-v1.zip › elife_poa_e44642_Figure_6_figure_supplement_2.pdf]

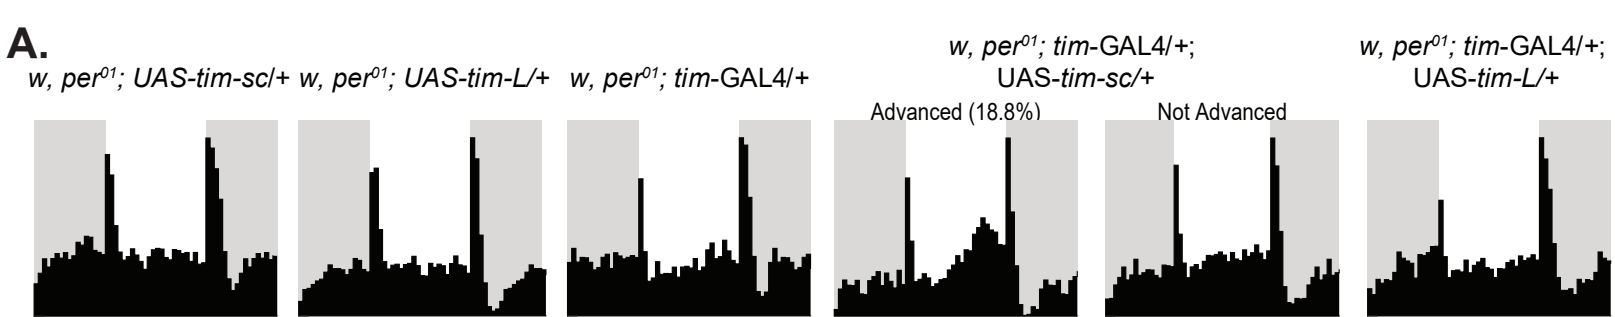

**B.**

| Genotype                                             | n  | % Evening anticipation | Phase of activity (h) | % Rhythmic | Period    | RI          |
|------------------------------------------------------|----|------------------------|-----------------------|------------|-----------|-------------|
| <i>w, per<sup>01</sup>; tim-GAL4/+</i>               | 27 | 7.4 (2)                | -                     | 0          | -         | -           |
| <i>w, per<sup>01</sup>; UAS-tim-L/+</i>              | 30 | 0                      | -                     | 3.3        | 22.5      | 0.24        |
| <i>w, per<sup>01</sup>; UAS-tim-sc/+</i>             | 31 | 3.2 (1)                | -                     | 0          | -         | -           |
| <i>w, per<sup>01</sup>; tim-GAL4/+; UAS-tim-L/+</i>  | 27 | 0                      | -                     | 7.4        | 25 ± 0.75 | 0.21 ± 0.08 |
| <i>w, per<sup>01</sup>; tim-GAL4/+; UAS-tim-sc/+</i> | 32 | 18.8 (6)               | 9.8 ± 0.54            | 3.1        | 24.75     | 0.25        |
