# Supplementary material for: Thermosensitive alternative splicing senses and mediates temperature adaptation in Drosophila
Source: eLife journal article supplement (doi:10.7554/elife.44642), 2019-11-08
Supplement: supp [file elife-44642-supp-v1.zip › elife_poa_e44642_Figure_8_figure_supplement_1.pdf]

| <i>D. melanogaster</i> |       |       |
|------------------------|-------|-------|
| Intron #               | 5' SS | 3' SS |
| 2                      | 0.92  | 0.97  |
| 3                      | 0.93  | 0.84  |
| 4                      | 0.98  | 0.97  |
| 5                      | 0.90  | 0.82  |
| 6                      | 0.82  | 0.69  |
| 7                      | 0.29  | 0.98  |
| 8                      | 0.92  | 0.94  |
| 9                      | 0.88  | 0.96  |
| 10                     | 0.69  | 0.58  |
| 11                     | 0.94  | 0.97  |
| 12                     | 0.90  | 0.32  |
| 13                     | 0.95  | 0.88  |
| 14                     | 0.94  | 0.93  |
| 15                     | 0.76  | 0.22  |

| <i>D. simulans</i> |       |       |
|--------------------|-------|-------|
| Intron #           | 5' SS | 3' SS |
| 2                  | 0.96  | 0.92  |
| 3                  | 0.98  | 0.98  |
| 4                  | 0.89  | 0.62  |
| 5                  | 0.82  | 0.59  |
| 6                  | 0.03  | ---   |
| 7                  | 0.22  | 0.93  |
| 8                  | 0.92  | 0.88  |
| 9                  | 0.88  | 0.96  |
| 10                 | 0.76  | 0.92  |
| 11                 | 0.96  | 0.94  |
| 12                 | 0.90  | 0.18  |
| 13                 | 0.95  | 0.75  |
| 14                 | 0.94  | 0.95  |
| 15                 | 0.76  | 0.22  |

| <i>D. yakuba</i> |       |       |
|------------------|-------|-------|
| Intron #         | 5' SS | 3' SS |
| 2                |       |       |
| 3                | 0.85  | 0.20  |
| 4                | 0.93  | 0.98  |
| 5                | 0.88  | 0.89  |
| 6                | 0.91  | 0.91  |
| 7                | 0.22  | 0.97  |
| 8                | 0.88  | 0.79  |
| 9                | 0.88  | 0.94  |
| 10               | 0.98  | 0.60  |
| 11               | 0.90  | 0.34  |
| 12               | 0.95  | 0.84  |
| 13               | 0.82  | 0.84  |
| 14               | 0.79  | 0.13  |

|           | 5' SS | 3' SS |
|-----------|-------|-------|
| Short 1st | 0.62  | 0.74  |
| Long 1st  | 0.54  |       |

FIGURE 8 - FIGURE SUPPLEMENT 1
