# Supplementary material for: Thermosensitive alternative splicing senses and mediates temperature adaptation in Drosophila
Source: eLife journal article supplement (doi:10.7554/elife.44642), 2019-11-08
Supplement: supp [file elife-44642-supp-v1.zip › elife_poa_e44642_Supplementary_file_1.xlsx]

## Sheet: sup_table1_to_plot_merge_18C
CycID	JTK_pvalue	JTK_BH.Q	JTK_period	JTK_adjphase	CG	zt3	zt7	zt11	zt15	zt19	zt23	zt3	zt7	zt11	zt15	zt19	zt23	gene.name	mean.exp	temp	AMP_1	AMP_2	AMP_min
CG00000-RA	0.248511	1	24	17	CG00000-RA	0.405107	0.496845	0.635738	1	0.767651	0.78774	0.436581	0	0.563351	1	0.2132	0.316178	RhoGAP1A	0.551866	18C	2.46848	Inf	2.46848
CG10002-RB	0.141715	1	24	1	CG10002-RB	0.234544	0.431485	0.322062	0.337731	1	0.912151	1	0.329414	0.169361	0.235789	0.640947	0.950529	fkh	0.547001	18C	4.2636	5.90455	4.2636
CG10006-RB	0.248511	1	24	11	CG10006-RB	0.849632	0.911779	1	0.524325	0.804997	0.206516	0.221421	0.194504	1	0.452474	0.189225	0.420933	Zip71B	0.564651	18C	4.84224	5.28471	4.84224
CG10007-RA	0.141715	1	24	13	CG10007-RA	0.885634	0.931585	0.928245	1	0.894232	0.754219	0.597371	1	0.88912	0.917763	0.866905	0.818992	Tango9	0.873672	18C	1.674	1.22101	1.22101
CG10009-RA	0.576952	1	24	19	CG10009-RA	0.528959	0.450516	0.587986	0.870483	0.361956	1	0.567343	0.644772	0.608543	0.682244	1	0.754986	Noa36	0.671482	18C	2.76277	1.64327	1.64327
CG10011-RA	1	1	24	1	CG10011-RA	0.830736	0.849049	0.65184	0.618452	0.974497	1	0.893005	0.852073	0.667543	0.522772	1	0.507345	CG10011	0.780609	18C	1.61694	1.97105	1.61694
CG10016-RA	1	1	24	15	CG10016-RA	0.728256	0.669879	1	0.749036	0.689998	0.354027	0.260032	0	0.528471	0.429189	1	0.329557	drm	0.561537	18C	3.84568	Inf	3.84568
CG10016-RB	1	1	24	15	CG10016-RB	0.728256	0.669879	1	0.749036	0.689998	0.354027	0.260032	0	0.528471	0.429189	1	0.329557	drm	0.561537	18C	3.84568	Inf	3.84568
CG10018-RA	1	1	24	3	CG10018-RA	0.428554	0.946083	0.538027	0.564202	0.324832	1	0.531884	0.700839	0.192171	0.10033	1	0	Snm1	0.527244	18C	3.07851	Inf	3.07851
CG10023-RA	0.880418	1	24	9	CG10023-RA	1	0.580951	0.867248	0.77952	0.498666	0.204686	1	0.864711	0.705671	0.943157	0.347179	0.554475	Fak	0.695522	18C	4.88552	2.88035	2.88035
CG10023-RB	0.880418	1	24	9	CG10023-RB	1	0.580951	0.867248	0.77952	0.498666	0.204686	1	0.864711	0.705671	0.943157	0.347179	0.554475	Fak	0.695522	18C	4.88552	2.88035	2.88035
CG10023-RC	0.880418	1	24	9	CG10023-RC	1	0.580951	0.867248	0.77952	0.498666	0.204686	1	0.864711	0.705671	0.943157	0.347179	0.554475	Fak	0.695522	18C	4.88552	2.88035	2.88035
CG10023-RD	0.880418	1	24	9	CG10023-RD	1	0.580951	0.867248	0.77952	0.498666	0.204686	1	0.864711	0.705671	0.943157	0.347179	0.554475	Fak	0.695522	18C	4.88552	2.88035	2.88035
CG10023-RE	0.880418	1	24	9	CG10023-RE	1	0.580951	0.867248	0.77952	0.498666	0.204686	1	0.864711	0.705671	0.943157	0.347179	0.554475	Fak	0.695522	18C	4.88552	2.88035	2.88035
CG10031-RA	1	1	24	21	CG10031-RA	0.764815	0.822364	0.748088	1	0.734563	0.977885	0.856698	0.916477	0.957697	1	0.916975	0.962129	CG10031	0.888141	18C	1.36135	1.09113	1.09113
CG10033-RA	0.0592039	1	24	23	CG10033-RA	0.836641	0.809583	0.80704	0.871565	0.887229	1	1	0.794154	0.768991	0.864135	0.880002	0.832355	for	0.862641	18C	1.2391	1.30041	1.2391
CG10033-RC	0.0592039	1	24	23	CG10033-RC	0.836641	0.809583	0.80704	0.871565	0.887229	1	1	0.794154	0.768991	0.864135	0.880002	0.832355	for	0.862641	18C	1.2391	1.30041	1.2391
CG10033-RD	0.0592039	1	24	23	CG10033-RD	0.836641	0.809583	0.80704	0.871565	0.887229	1	1	0.794154	0.768991	0.864135	0.880002	0.832355	for	0.862641	18C	1.2391	1.30041	1.2391
CG10033-RE	0.0592039	1	24	23	CG10033-RE	0.836641	0.809583	0.80704	0.871565	0.887229	1	1	0.794154	0.768991	0.864135	0.880002	0.832355	for	0.862641	18C	1.2391	1.30041	1.2391
CG10033-RF	0.0592039	1	24	23	CG10033-RF	0.836641	0.809583	0.80704	0.871565	0.887229	1	1	0.794154	0.768991	0.864135	0.880002	0.832355	for	0.862641	18C	1.2391	1.30041	1.2391
CG10033-RG	0.0592039	1	24	23	CG10033-RG	0.836641	0.809583	0.80704	0.871565	0.887229	1	1	0.794154	0.768991	0.864135	0.880002	0.832355	for	0.862641	18C	1.2391	1.30041	1.2391
CG10033-RH	0.0592039	1	24	23	CG10033-RH	0.836641	0.809583	0.80704	0.871565	0.887229	1	1	0.794154	0.768991	0.864135	0.880002	0.832355	for	0.862641	18C	1.2391	1.30041	1.2391
CG10033-RI	0.0592039	1	24	23	CG10033-RI	0.836641	0.809583	0.80704	0.871565	0.887229	1	1	0.794154	0.768991	0.864135	0.880002	0.832355	for	0.862641	18C	1.2391	1.30041	1.2391
CG10033-RJ	0.0592039	1	24	23	CG10033-RJ	0.836641	0.809583	0.80704	0.871565	0.887229	1	1	0.794154	0.768991	0.864135	0.880002	0.832355	for	0.862641	18C	1.2391	1.30041	1.2391
CG10038-RA	0.209359	1	24	15	CG10038-RA	0.310001	0.950504	1	0.850257	0.652701	0.870716	0.318081	0.803315	0.849956	1	0.894775	0.82305	CG10038	0.776946	18C	3.2258	1.24484	1.24484
CG10038-RB	0.209359	1	24	15	CG10038-RB	0.310001	0.950504	1	0.850257	0.652701	0.870716	0.318081	0.803315	0.849956	1	0.894775	0.82305	CG10038	0.776946	18C	3.2258	1.24484	1.24484
CG1004-RA	1	1	24	21	CG1004-RA	0.395589	0.400266	0.6984	0.862578	0.337326	1	0.732754	1	0.732781	0.987289	0.995224	0.762838	rho	0.742087	18C	2.96449	1.36466	1.36466
CG10042-RA	0.00025974	0.3972	24	23	CG10042-RA	0.701271	0.659391	0.440204	0.577025	0.885907	1	0.848928	0.513949	0.373039	0.562635	1	0.988672	MBD-R2	0.712585	18C	2.27168	2.68069	2.27168
CG10042-RB	0.00025974	0.3972	24	23	CG10042-RB	0.701271	0.659391	0.440204	0.577025	0.885907	1	0.848928	0.513949	0.373039	0.562635	1	0.988672	MBD-R2	0.712585	18C	2.27168	2.68069	2.27168
CG10043-RA	0.421631	1	24	1	CG10043-RA	1	0.235856	0.663937	0.632944	0.583056	0.747893	0.704495	0.965412	0.585434	0.611293	0.987376	1	RtGEF	0.726475	18C	4.23987	1.70813	1.70813
CG10043-RB	0.421631	1	24	1	CG10043-RB	1	0.235856	0.663937	0.632944	0.583056	0.747893	0.704495	0.965412	0.585434	0.611293	0.987376	1	RtGEF	0.726475	18C	4.23987	1.70813	1.70813
CG10043-RD	0.576952	1	24	1	CG10043-RD	1	0.235856	0.724295	0.632944	0.583056	0.747893	0.704495	0.965412	0.585434	0.611293	0.987376	1	RtGEF	0.731504	18C	4.23987	1.70813	1.70813
CG10045-RA	0.772187	1	24	5	CG10045-RA	1	0.957262	0.787872	0.972202	0.730763	0.815702	0.972345	0.989416	0.961068	0.893449	0.848963	1	GstD1	0.910754	18C	1.36843	1.17791	1.17791
CG10045-RB	0.880418	1	24	1	CG10045-RB	0.753031	0.613828	0.55484	0.695177	0.435044	1	0.972345	0.989416	0.961068	0.893449	0.848963	1	GstD1	0.809763	18C	2.29862	1.17791	1.17791
CG10047-RA	0.0363147	1	24	11	CG10047-RA	0.726751	0.794443	1	0.901319	0.558841	0.593947	0.868837	1	0.926613	0.750339	0.840909	0.729671	Syt4	0.807639	18C	1.78942	1.37048	1.37048
CG10053-RA	1	1	24	1	CG10053-RA	1	0.551904	0.941584	0.822827	0.947466	0.777809	1	0.37059	0.366949	0.412631	0.347179	0.435659	CG10053	0.66455	18C	1.81191	2.88035	1.81191
CG10055-RA	1	1	0	NA	CG10055-RA	0.271787	1	0.497603	0.894533	0.343345	0.35233	0.940772	0.3199	0.68529	0.543826	0.829914	1	CG10055	0.639942	18C	3.67936	3.12598	3.12598
CG10059-RA	1	1	24	1	CG10059-RA	1	0.681363	0.69747	0.274276	0.842192	0.648174	0.88931	0.678412	0.422777	0.573887	1	0.355922	MAGE	0.671982	18C	3.64597	2.80961	2.80961
CG10060-RA	1	1	24	1	CG10060-RA	0.89713	0.889938	0.683232	0.673049	1	0.564393	0.568839	0.725354	0.406074	0.778796	0.650783	1	Galphai	0.736466	18C	1.77181	2.4626	1.77181
CG10062-RA	1	1	24	9	CG10062-RA	0.637224	0.963881	1	0.664145	0.804997	0.247819	0.996675	0.738716	0.806479	0.528762	0.674305	1	CG10062	0.75525	18C	4.0352	1.89121	1.89121
CG10067-RA	0.141715	1	24	11	CG10067-RA	0.761958	0.897313	0.961628	0.697514	1	0.734721	0.816406	0.891236	1	0.798575	0.529046	0.636174	Act57B	0.810381	18C	1.43366	1.89019	1.43366
CG10068-RA	1	1	24	21	CG10068-RA	0.405107	0.621056	0.158934	1	0.767651	0	0.789034	0.885649	0.765495	0.633934	0.973996	1	CG10068	0.666738	18C	Inf	1.57745	1.57745
CG10069-RA	1	1	24	1	CG10069-RA	0.374513	0.469762	0.374008	0.56029	1	0.794454	0.842022	0.616385	1	0.632385	0.906148	0.533577	MFS16	0.675295	18C	2.67374	1.87414	1.87414
CG10069-RB	1	1	24	1	CG10069-RB	0.374513	0.469762	0.374008	0.56029	1	0.794454	0.842022	0.616385	1	0.632385	0.906148	0.533577	MFS16	0.675295	18C	2.67374	1.87414	1.87414
CG10069-RC	1	1	24	1	CG10069-RC	0.374513	0.469762	0.374008	0.56029	1	0.794454	0.842022	0.616385	1	0.632385	0.906148	0.533577	MFS16	0.675295	18C	2.67374	1.87414	1.87414
CG1007-RA	1	1	24	1	CG1007-RA	0.822795	0.956923	0.788088	0.86845	1	0.860659	1	0.763858	0.767988	0.824693	0.776154	0.826547	emc	0.85468	18C	1.26889	1.30914	1.26889
CG10071-RA	1	1	24	21	CG10071-RA	0.817645	0.88684	0.909424	1	0.775357	0.88598	0.790452	0.96807	0.761788	0.898836	0.949116	1	RpL29	0.886959	18C	1.28973	1.3127	1.28973
CG10071-RB	1	1	24	21	CG10071-RB	0.817645	0.88684	0.909424	1	0.775357	0.88598	0.790452	0.96807	0.761788	0.898836	0.949116	1	RpL29	0.886959	18C	1.28973	1.3127	1.28973
CG10071-RC	1	1	24	21	CG10071-RC	0.817645	0.88684	0.909424	1	0.775357	0.88598	0.790334	0.967758	0.761147	0.898613	0.948308	1	RpL29	0.886784	18C	1.28973	1.31381	1.28973
CG10072-RA	0.489949	1	24	7	CG10072-RA	0.96512	1	0.548378	0.739359	0.882886	0.776564	0.694335	1	0.554238	0.258901	0.372585	0.245576	sgl	0.669828	18C	1.82356	4.07206	1.82356
CG10075-RA	1	1	24	15	CG10075-RA	0.836635	0.655121	0.676667	0.815496	1	0.67577	0.777531	0.977948	0.728914	1	0.68461	0.567363	CG10075	0.783005	18C	1.52644	1.76254	1.52644
CG10076-RA	1	1	24	15	CG10076-RA	0.407786	0.51484	0.922269	0.71055	1	0.746305	1	0.651743	0.767284	0.578064	0.670812	0.585989	spir	0.71297	18C	2.45226	1.72991	1.72991
CG10076-RB	1	1	24	15	CG10076-RB	0.407786	0.51484	0.922269	0.71055	1	0.746305	1	0.651743	0.767284	0.578064	0.670812	0.585989	spir	0.71297	18C	2.45226	1.72991	1.72991
CG10076-RC	1	1	24	15	CG10076-RC	0.407786	0.51484	0.922269	0.71055	1	0.746305	1	0.651743	0.767284	0.578064	0.670812	0.585989	spir	0.71297	18C	2.45226	1.72991	1.72991
CG10076-RD	0.576952	1	24	3	CG10076-RD	0.739256	0.551882	0.47918	0.238023	0.30453	1	0.77961	0.328722	0.422514	1	0.426401	0.553311	spir	0.568619	18C	4.20128	3.04208	3.04208
CG10077-RA	0.141715	1	24	1	CG10077-RA	0.848538	0.867243	0.70616	0.818093	0.779598	1	0.827223	0.88785	0.804255	0.83978	1	0.899717	CG10077	0.856538	18C	1.41611	1.24339	1.24339
CG10077-RB	0.772187	1	24	3	CG10077-RB	0.761113	0.542421	0.258253	0.541634	0.467759	1	1	0.48802	0.16727	0.314386	0.221562	0	CG10077	0.480201	18C	3.87218	Inf	3.87218
CG10078-RA	0.0592039	1	24	3	CG10078-RA	1	0.829301	0.632785	0.590067	0.489015	0.844395	0.964466	1	0.555874	0.507014	0.930245	0.975712	Prat2	0.776573	18C	2.04493	1.97233	1.97233
CG10078-RB	0.0592039	1	24	3	CG10078-RB	1	0.829301	0.632785	0.590067	0.489015	0.844395	0.964466	1	0.555874	0.507014	0.930245	0.975712	Prat2	0.776573	18C	2.04493	1.97233	1.97233
CG10079-RA	0.663955	1	24	1	CG10079-RA	0.447187	0.71299	0.438609	0.515141	0.635542	1	0.742621	0.978517	0.670778	0.831734	0.753635	1	Egfr	0.72723	18C	2.27994	1.49081	1.49081
CG10079-RB	0.663955	1	24	1	CG10079-RB	0.447187	0.71299	0.438609	0.515141	0.635542	1	0.742621	0.978517	0.670778	0.831734	0.753635	1	Egfr	0.72723	18C	2.27994	1.49081	1.49081
CG10080-RA	0.576952	1	24	21	CG10080-RA	0.514265	0.315361	0.134507	0.423151	0.649665	1	0.302934	0.46569	0.364837	1	0.690363	0.319942	mahj	0.51506	18C	7.43458	3.12557	3.12557
CG10082-RA	0.663955	1	24	5	CG10082-RA	1	0.830411	0.801	0.822827	0.986943	0.729196	1	0.90908	0.637182	0.62146	0.73535	0.501054	CG10082	0.797875	18C	1.37137	1.99579	1.37137
CG10082-RB	0.663955	1	24	5	CG10082-RB	1	0.830411	0.801	0.822827	0.986943	0.729196	1	0.90908	0.637182	0.62146	0.73535	0.501054	CG10082	0.797875	18C	1.37137	1.99579	1.37137
CG10083-RA	1	1	24	15	CG10083-RA	0.824568	0.910164	0.9058	0.787033	1	0.256542	0.848299	0.833588	1	0.623791	0.9707	0.929333	Abp1	0.824152	18C	3.89799	1.6031	1.6031
CG10084-RA	0.421631	1	24	21	CG10084-RA	0.654377	0.828452	0.894413	0.851081	1	0.861983	1	0.829086	0.669832	0.858379	0.883402	0.882888	swm	0.851158	18C	1.52817	1.49291	1.49291
CG10084-RB	0.421631	1	24	21	CG10084-RB	0.654377	0.828452	0.894413	0.851081	1	0.861983	1	0.769866	0.669832	0.858379	0.883402	0.882888	swm	0.846223	18C	1.52817	1.49291	1.49291
CG10089-RD	1	1	24	23	CG10089-RD	0.463436	0.497334	1	0.285996	0.878179	0.22529	0.890707	0.690379	0.552134	0.708299	1	0.99605	CG10089	0.682317	18C	4.43872	1.81115	1.81115
CG1009-RA	0.663955	1	24	11	CG1009-RA	0.691226	0.907364	1	0.719836	0.757243	0.819064	0.627739	0.546415	1	0.509527	0.321878	0.361626	Psa	0.688493	18C	1.59302	3.10677	1.59302
CG1009-RB	0.663955	1	24	11	CG1009-RB	0.691226	0.907364	1	0.719836	0.757243	0.819064	0.627739	0.546415	1	0.509527	0.321878	0.361626	Psa	0.688493	18C	1.59302	3.10677	1.59302
CG1009-RC	0.663955	1	24	11	CG1009-RC	0.691226	0.907364	1	0.719836	0.757243	0.819064	0.627739	0.546415	1	0.509527	0.321878	0.361626	Psa	0.688493	18C	1.59302	3.10677	1.59302
CG1009-RD	0.663955	1	24	11	CG1009-RD	0.691226	0.907364	1	0.719836	0.757243	0.819064	0.627739	0.546415	1	0.509527	0.321878	0.361626	Psa	0.688493	18C	1.59302	3.10677	1.59302
CG1009-RE	0.663955	1	24	11	CG1009-RE	0.691226	0.907364	1	0.719836	0.757243	0.819064	0.627739	0.546415	1	0.509527	0.321878	0.361626	Psa	0.688493	18C	1.59302	3.10677	1.59302
CG1009-RF	0.663955	1	24	11	CG1009-RF	0.691226	0.907364	1	0.719836	0.757243	0.819064	0.627739	0.546415	1	0.509527	0.321878	0.361626	Psa	0.688493	18C	1.59302	3.10677	1.59302
CG10091-RA	1	1	24	1	CG10091-RA	1	0.592081	0.595254	0.4256	0.849452	0.469367	0.965369	0.732377	0.554895	0.938085	1	0.593203	GstD9	0.726307	18C	2.34962	1.80214	1.80214
CG10092-RA	0.300911	1	24	15	CG10092-RA	0.584392	0.516045	0.641964	0.980942	0.398658	1	0.390626	0.44118	0.806482	1	0.763033	0.35362	CG10092	0.656412	18C	2.56	2.8279	2.56
CG10095-RA	1	1	24	13	CG10095-RA	0.155307	1	0.487447	0.575057	0.147148	0	1	0.343736	0.235633	0.820136	0.817439	0.330619	dpr15	0.49271	18C	Inf	4.24389	4.24389
CG10098-RA	1	1	24	1	CG10098-RA	0.901439	0.667156	1	0.716151	0.471218	0.906656	0.631227	0.70178	0.516709	0.20465	0.893454	1	CG10098	0.717537	18C	2.12216	4.88638	2.12216
CG10103-RA	0.170207	1	24	3	CG10103-RA	1	0.919839	0.695488	0.897629	0.473733	0.83968	1	0.658827	0.830675	0.614736	0.808814	0.927897	CG10103	0.80561	18C	2.11089	1.62671	1.62671
CG10105-RA	1	1	24	21	CG10105-RA	0.584597	1	0.700131	0.734192	0.991165	0.957274	0.530222	0.409553	0.677104	0.465594	1	0.46344	Sin1	0.709439	18C	1.886	2.44169	1.886
CG10106-RA	1	1	24	21	CG10106-RA	0.874919	0.843693	0.917091	0.917744	0.708725	1	0.836609	1	0.709794	0.876413	0.9652	0.848236	Tsp42Ee	0.874869	18C	1.41098	1.40886	1.40886
CG10107-RA	1	1	24	1	CG10107-RA	0.81536	1	0.701688	0.649258	0.946967	0.409157	0.80901	0.565899	0.802918	0.659403	0.827944	1	velo	0.765634	18C	2.44405	1.7671	1.7671
CG10107-RB	1	1	24	1	CG10107-RB	0.81536	1	0.701688	0.649258	0.946967	0.409157	0.80901	0.565899	0.802918	0.659403	0.827944	1	velo	0.765634	18C	2.44405	1.7671	1.7671
CG10107-RC	1	1	24	1	CG10107-RC	0.81536	1	0.701688	0.649258	0.946967	0.409157	0.80901	0.565899	0.802918	0.659403	0.827944	1	velo	0.765634	18C	2.44405	1.7671	1.7671
CG10108-RA	1	1	24	3	CG10108-RA	1	0.836218	0.855985	0.947498	0.574222	0.942798	1	0.823534	0.541955	0.966736	0.662312	0.792108	phyl	0.828614	18C	1.74149	1.84517	1.74149
CG10109-RA	0.772187	1	24	21	CG10109-RA	0.472174	0.408776	0.632017	0.731327	1	0.918152	0.903481	1	0.718148	0.511275	0.741227	0.73283	L	0.730784	18C	2.44633	1.9559	1.9559
CG10110-RA	0.576952	1	24	3	CG10110-RA	0.587059	1	0.460638	0.375704	0.123604	0.634194	1	0.419254	0.862201	0.128612	0.971131	0.576078	Cpsf160	0.594873	18C	8.09035	7.77531	7.77531
CG10110-RB	0.772187	1	24	3	CG10110-RB	0.52183	1	0.460638	0.375704	0.123604	0.634194	1	0.419254	0.862201	0.128612	0.971131	0.576078	Cpsf160	0.589437	18C	8.09035	7.77531	7.77531
CG10112-RA	0.209359	1	24	15	CG10112-RA	0.270072	0.248423	0.741694	1	0.511767	0.52516	0.0922585	0.182347	1	0.391564	0.236531	0	Cpr51A	0.433318	18C	10.8391	Inf	10.8391
CG10117-RA	1	1	24	13	CG10117-RA	0.994355	0.271006	0.780224	1	0.209359	0.429677	0.114989	1	0.353139	0.433809	0.62892	0.553786	ttv	0.564105	18C	8.69652	2.83175	2.83175
CG10118-RA	0.027207	1	24	5	CG10118-RA	1	0.613226	0.784653	0.164565	0.189493	0.583357	1	0.707794	0.68965	0.471578	0.61785	0.830642	ple	0.637734	18C	6.07661	2.12054	2.12054
CG10118-RB	0.027207	1	24	5	CG10118-RB	1	0.613226	0.784653	0.164565	0.189493	0.583357	1	0.707794	0.68965	0.471578	0.61785	0.830642	ple	0.637734	18C	6.07661	2.12054	2.12054
CG10119-RA	1	1	24	1	CG10119-RA	1	0.811877	0.751499	0.903951	0.907432	0.410814	1	0.426846	0.411343	0.867881	0.64195	0.803264	LamC	0.744738	18C	2.43419	2.43106	2.43106
CG10120-RA	1	1	24	3	CG10120-RA	0.876411	0.902449	1	0.913437	0.719654	0.887605	0.667437	0.765514	0.704159	0.63332	0.706635	1	Men	0.814718	18C	1.49827	1.57898	1.49827
CG10120-RB	1	1	24	3	CG10120-RB	0.876411	0.902449	1	0.913437	0.719654	0.887605	0.667437	0.765514	0.704159	0.63332	0.706635	1	Men	0.814718	18C	1.49827	1.57898	1.49827
CG10121-RA	0.576952	1	24	3	CG10121-RA	1	0.652789	0.278425	0.583942	0.794649	0.689992	0.610865	0.888754	0.758683	0.672165	0.598174	1	SP1173	0.710703	18C	3.59163	1.67175	1.67175
CG10121-RB	0.576952	1	24	3	CG10121-RB	1	0.652789	0.278425	0.583942	0.794649	0.689992	0.610865	0.888754	0.758683	0.672165	0.598174	1	SP1173	0.710703	18C	3.59163	1.67175	1.67175
CG10121-RC	0.576952	1	24	3	CG10121-RC	1	0.652789	0.278425	0.583942	0.794649	0.689992	0.610865	0.888754	0.758683	0.672165	0.598174	1	SP1173	0.710703	18C	3.59163	1.67175	1.67175
CG10121-RD	0.576952	1	24	3	CG10121-RD	1	0.652789	0.278425	0.583942	0.794649	0.689992	0.610865	0.888754	0.758683	0.672165	0.598174	1	SP1173	0.710703	18C	3.59163	1.67175	1.67175
CG10122-RA	1	1	24	9	CG10122-RA	0.316634	0.949268	0.883371	0.52107	1	0.889347	1	0.768632	0.928349	0.576374	0.688424	0.281638	RpI1	0.733592	18C	3.15822	3.55065	3.15822
CG10123-RA	1	1	24	1	CG10123-RA	0.316634	0.420698	0.331264	0.477648	1	0.102617	0.82334	0.361626	0.83665	0.291202	0.73294	1	Top3alpha	0.557885	18C	9.74497	3.43404	3.43404
CG10126-RA	1	1	24	21	CG10126-RA	0.559978	0.721826	0.654599	0.667639	0.628009	1	0.523198	1	0.524515	0.791701	0.776323	0.837966	CG10126	0.723813	18C	1.91132	1.90652	1.90652
CG10126-RB	1	1	24	21	CG10126-RB	0.559978	0.721826	0.654599	0.667639	0.628009	1	0.523198	1	0.524515	0.791701	0.776323	0.837966	CG10126	0.723813	18C	1.91132	1.90652	1.90652
CG10128-RA	1	1	24	21	CG10128-RA	0.672501	0.509429	0.49664	0.943953	0.524729	1	0.285457	0.806001	0.699856	1	0.31365	0.723561	tra2	0.664648	18C	3.50315	3.18826	3.18826
CG10128-RB	1	1	24	21	CG10128-RB	0.672501	0.509429	0.49664	0.943953	0.524729	1	0.285457	0.806001	0.699856	1	0.31365	0.723561	tra2	0.664648	18C	3.50315	3.18826	3.18826
CG10128-RC	1	1	24	21	CG10128-RC	0.672501	0.509429	0.49664	0.943953	0.524729	1	0.285457	0.806001	0.699856	1	0.31365	0.723561	tra2	0.664648	18C	3.50315	3.18826	3.18826
CG10128-RD	1	1	24	21	CG10128-RD	0.672501	0.509429	0.49664	0.943953	0.524729	1	0.285457	0.806001	0.699856	1	0.31365	0.723561	tra2	0.664648	18C	3.50315	3.18826	3.18826
CG10128-RE	1	1	24	21	CG10128-RE	0.672501	0.509429	0.49664	0.943953	0.524729	1	0.285457	0.806001	0.699856	1	0.31365	0.723561	tra2	0.664648	18C	3.50315	3.18826	3.18826
CG10128-RF	1	1	24	21	CG10128-RF	0.672501	0.509429	0.49664	0.943953	0.524729	1	0.285457	0.806001	0.699856	1	0.31365	0.723561	tra2	0.664648	18C	3.50315	3.18826	3.18826
CG10128-RG	1	1	24	21	CG10128-RG	0.672501	0.509429	0.49664	0.943953	0.524729	1	0.285457	0.806001	0.699856	1	0.31365	0.723561	tra2	0.664648	18C	3.50315	3.18826	3.18826
CG10130-RA	0.489949	1	24	1	CG10130-RA	0.839967	0.897027	0.659083	0.832198	0.985325	1	0.549117	0.994031	0.58175	0.719982	0.608519	1	Sec61beta	0.805583	18C	1.82111	1.71895	1.71895
CG10131-RA	1	1	24	3	CG10131-RA	0.523625	1	0.892163	0.504714	0.65204	0.960018	0.780068	0.567095	0.858482	0.803379	0.559367	1	CG10131	0.758413	18C	1.98132	1.78774	1.78774
CG10132-RA	1	1	24	13	CG10132-RA	0.847974	1	0.818912	0.80508	0.61802	0.887871	0.576233	0.546679	0.707863	1	0.393957	0.496605	CG10132	0.724933	18C	1.73541	2.53835	1.73541
CG10133-RA	0.421631	1	24	3	CG10133-RA	1	0.735872	0.706188	0.329131	0.947466	0.777809	0.9189	0.46569	0.383079	1	0.724881	0.895837	CG10133	0.740404	18C	3.03831	2.61043	2.61043
CG10134-RA	1	1	24	1	CG10134-RA	0.342844	0.10512	0.40352	0	0.649665	1	0.222885	0.513949	0.553637	0.367876	1	0.282478	beat-Va	0.453498	18C	Inf	3.5401	3.5401
CG10137-RA	1	1	24	19	CG10137-RA	0.923516	0.970842	0.62112	0.705616	1	0.769627	0.456505	0.931379	0.518753	1	0.553729	0.690541	CG10137	0.761802	18C	2.19056	1.9277	1.9277
CG10139-RA	1	1	24	1	CG10139-RA	0.399984	0.630722	0.448356	0.423151	0.86622	1	1	0.578483	0.771075	0.736122	0.60447	0.741876	CG10139	0.683372	18C	2.5001	1.72866	1.72866
CG10142-RA	0.0931041	1	24	1	CG10142-RA	0.704734	0.805923	0.493191	0.564202	0.43311	1	1	0.420917	0.388903	0.772864	0.700294	0.985734	Ance-5	0.689156	18C	2.30888	2.57133	2.30888
CG10144-RA	1	1	24	9	CG10144-RA	1	0.66655	0.4435	0.357751	0.411942	0.169089	0.534923	0.440527	0.422777	0.630645	1	0.25423	CG10144	0.527661	18C	5.91405	3.93345	3.93345
CG10145-RA	1	1	24	9	CG10145-RA	0.849632	0.558232	1	0.649164	0.517498	0.354027	0.631227	0.987691	0.587979	0.762788	0.573159	1	mspo	0.70595	18C	2.82464	1.74472	1.74472
CG10146-RA	0.170207	1	24	13	CG10146-RA	0.249297	0.286641	0.293417	1	0.17715	0.181786	0.848215	0.558828	0.536311	1	0.253708	0.0537502	AttA	0.453259	18C	5.64493	18.6046	5.64493
CG10147-RA	1	1	24	17	CG10147-RA	0.43977	0.970842	0.552107	0.361854	1	0.171028	0.774972	0	1	0.313251	0.567675	0.561244	CG10147	0.559395	18C	5.84698	Inf	5.84698
CG10149-RA	1	1	24	9	CG10149-RA	0.71206	0.950935	0.99328	0.813753	0.869552	1	0.674526	0.60863	1	0.466765	0.529454	0.59005	Rpn6	0.767417	18C	1.48252	2.1424	1.48252
CG10149-RB	1	1	24	9	CG10149-RB	0.71206	0.950935	0.99328	0.813753	0.869552	1	0.674526	0.60863	1	0.466765	0.529454	0.59005	Rpn6	0.767417	18C	1.48252	2.1424	1.48252
CG10151-RA	0.772187	1	24	3	CG10151-RA	0.452978	1	0.284344	0.447267	0.343345	0.528495	1	0.423532	0.290333	0.707368	0.366255	0.543159	CG10151	0.532256	18C	3.51686	3.44432	3.44432
CG10151-RB	0.772187	1	24	3	CG10151-RB	0.452978	1	0.284344	0.447267	0.343345	0.528495	1	0.423532	0.290333	0.707368	0.366255	0.543159	CG10151	0.532256	18C	3.51686	3.44432	3.44432
CG10151-RC	0.772187	1	24	3	CG10151-RC	0.452978	1	0.284344	0.447267	0.343345	0.528495	1	0.423532	0.290333	0.707368	0.366255	0.543159	CG10151	0.532256	18C	3.51686	3.44432	3.44432
CG10151-RD	0.772187	1	24	3	CG10151-RD	0.452978	1	0.284344	0.447267	0.343345	0.528495	1	0.423532	0.290333	0.707368	0.366255	0.543159	CG10151	0.532256	18C	3.51686	3.44432	3.44432
CG10152-RA	0.248511	1	24	9	CG10152-RA	0.899707	1	0.661836	0.508958	0.426221	0.437375	0.24665	1	0.71978	0.447365	0.518859	0.793517	beat-IV	0.638356	18C	4.05432	2.23531	2.23531
CG10153-RA	1	1	24	13	CG10153-RA	0.80993	0.869173	1	0.774237	0.56425	0.602178	0.689931	1	0.479853	0.761334	0.89621	0.743239	Trs31	0.765861	18C	1.77226	2.08397	1.77226
CG10155-RA	0.772187	1	24	5	CG10155-RA	0.228301	1	0.358274	0.456212	0.123604	0.697613	0.802185	0.519837	0.380108	0.28527	0.303437	1	Spred	0.512903	18C	8.09035	3.50545	3.50545
CG10157-RA	0.772187	1	24	21	CG10157-RA	0.559707	0.485421	0.690133	0.677654	1	0.792949	0.642693	1	0.571254	0.699663	0.64273	0.766872	CG10157	0.710756	18C	2.06007	1.75053	1.75053
CG10158-RA	1	1	24	3	CG10158-RA	0.463436	0.615747	1	0.413105	0.585453	0.750967	0.611904	0.488011	0.610888	0.744183	0.399079	1	CG10158	0.640231	18C	2.42069	2.50577	2.42069
CG10159-RA	1	1	24	15	CG10159-RA	1	0.868737	0.817347	0.959965	0.86851	0.405109	0.9189	0.558828	0.845966	1	0.921203	0.694274	BEAF-32	0.82157	18C	2.46847	1.78946	1.78946
CG10159-RB	1	1	24	15	CG10159-RB	1	0.868737	0.817347	0.959965	0.86851	0.405109	0.9189	0.558828	0.845966	1	0.921203	0.694274	BEAF-32	0.82157	18C	2.46847	1.78946	1.78946
CG10160-RA	0.0363147	1	24	17	CG10160-RA	0.301556	0.369845	0.41408	0.607915	1	0.469106	0.350766	0.462188	0.698471	1	0.647215	0.727447	ImpL3	0.587382	18C	3.31613	2.16362	2.16362
CG10161-RB	1	1	24	3	CG10161-RB	0.870295	0.789336	0.776	0.791218	0.89377	1	0.559763	1	0.659611	0.71863	0.732385	0.585135	eIF-3p66	0.781345	18C	1.78647	1.70901	1.70901
CG10165-RA	1	1	24	3	CG10165-RA	0.904426	0.935918	0.776192	1	0.856913	0.439669	0.394517	0.82893	0.404507	0.422374	0.492061	1	CG10165	0.704625	18C	2.53474	2.47215	2.47215
CG10165-RB	1	1	24	3	CG10165-RB	0.904426	0.935918	0.776192	1	0.856913	0.439669	0.394517	0.82893	0.404507	0.422374	0.492061	1	CG10165	0.704625	18C	2.53474	2.47215	2.47215
CG10166-RA	1	1	24	3	CG10166-RA	0.89403	0.805232	0.756309	1	0.688239	0.760577	0.962383	0.905777	0.955669	0.856938	0.761148	1	CG10166	0.862192	18C	1.45298	1.31381	1.31381
CG1017-RA	1	1	24	5	CG1017-RA	0.431774	0.764906	0.715229	0.55265	1	0.932882	0.724428	1	0.498549	0.683249	0.47169	0.39348	Mfap1	0.680736	18C	2.31603	2.54143	2.31603
CG10171-RA	1	1	24	1	CG10171-RA	0.642832	0.473042	0.95836	0.158682	0.609061	1	0.959518	0.339206	0.655305	0.706323	1	0.800824	CG10171	0.691929	18C	6.30192	2.94806	2.94806
CG10171-RB	1	1	24	1	CG10171-RB	0.642832	0.473042	0.95836	0.158682	0.609061	1	0.959518	0.339206	0.655305	0.706323	1	0.800824	CG10171	0.691929	18C	6.30192	2.94806	2.94806
CG10173-RA	1	1	24	15	CG10173-RA	0.722148	0.502453	0.730088	0.75418	1	0.756125	0.766513	1	0.67865	0.866099	0.765316	0.53863	Best2	0.756684	18C	1.99023	1.85656	1.85656
CG10175-RA	0.300911	1	24	21	CG10175-RA	0.365347	0.423188	0.477785	0.801646	1	0.631489	0.626937	1	0.566287	0.715784	0.817766	0.878201	CG10175	0.692036	18C	2.73712	1.76589	1.76589
CG10175-RB	0.300911	1	24	21	CG10175-RB	0.365347	0.423188	0.477785	0.801646	1	0.631489	0.626937	1	0.566287	0.715784	0.817766	0.878201	CG10175	0.692036	18C	2.73712	1.76589	1.76589
CG10175-RC	0.300911	1	24	21	CG10175-RC	0.365347	0.423188	0.477785	0.801646	1	0.631489	0.626937	1	0.566287	0.715784	0.817766	0.878201	CG10175	0.692036	18C	2.73712	1.76589	1.76589
CG10176-RA	1	1	24	3	CG10176-RA	0.899964	0.867243	0.5044	0.95209	0.243624	1	0.867342	1	0.538611	0.937337	0.6949	0.366415	CG10176	0.739327	18C	4.10468	2.72915	2.72915
CG10178-RA	0.576952	1	24	3	CG10178-RA	1	0.855962	0.58849	0.659976	0.730338	0.303832	0.871012	0.985666	0.768237	0.811836	0.875721	1	CG10178	0.787589	18C	3.2913	1.30168	1.30168
CG10181-RA	1	1	24	21	CG10181-RA	0.883937	0.768583	0.72464	0.922728	1	0.820936	1	0.988241	0.963476	0.911718	0.940055	0.66537	Mdr65	0.882474	18C	1.38	1.50292	1.38
CG10184-RA	0.0729854	1	24	1	CG10184-RA	0.640854	0.756866	0.484224	0.553352	0.674652	1	0.696347	0.845519	0.540967	0.511065	0.716957	1	CG10184	0.701734	18C	2.06516	1.9567	1.9567
CG10186-RA	0.576952	1	24	1	CG10186-RA	0.746189	0.859513	0.865062	0.768863	0.706988	1	1	0.870149	0.742571	0.757576	0.935218	0.922346	CG10186	0.847873	18C	1.41445	1.34667	1.34667
CG10186-RC	0.576952	1	24	1	CG10186-RC	0.746189	0.859513	0.865062	0.768863	0.706988	1	1	0.870149	0.742571	0.757576	0.935218	0.922346	CG10186	0.847873	18C	1.41445	1.34667	1.34667
CG10186-RD	0.576952	1	24	1	CG10186-RD	0.80354	0.987967	0.85748	0.981843	0.936431	1	1	0.870149	0.742571	0.757576	0.935218	0.922346	CG10186	0.899593	18C	1.24449	1.34667	1.24449
CG10186-RE	0.576952	1	24	1	CG10186-RE	0.746189	0.859513	0.865062	0.768863	0.706988	1	1	0.870149	0.742571	0.757576	0.935218	0.922346	CG10186	0.847873	18C	1.41445	1.34667	1.34667
CG10186-RF	0.576952	1	24	1	CG10186-RF	0.746189	0.859513	0.865062	0.768863	0.706988	1	1	0.870149	0.742571	0.757576	0.935218	0.922346	CG10186	0.847873	18C	1.41445	1.34667	1.34667
CG10188-RA	1	1	24	9	CG10188-RA	0.468165	0.430636	1	0.428021	0.44357	0.455178	1	0.542564	0.885548	0.832197	0.754055	0.770363	CG10188	0.667525	18C	2.33634	1.8431	1.8431
CG10188-RB	1	1	24	9	CG10188-RB	0.468165	0.430636	1	0.428021	0.44357	0.455178	1	0.542564	0.885548	0.832197	0.754055	0.770363	CG10188	0.667525	18C	2.33634	1.8431	1.8431
CG10189-RA	1	1	24	1	CG10189-RA	1	0.891966	0.570657	0.29921	0.861333	0.176775	0.390048	0.642436	0.440393	0.919691	1	0.61792	CG10189	0.650869	18C	5.65692	2.2707	2.2707
CG1019-RA	1	1	24	13	CG1019-RA	0.788552	0.784857	0.842439	0.818539	1	0.790269	0.496093	1	0.504484	0.350146	0.533459	0.532967	Mlp84B	0.703484	18C	2.01575	2.85595	2.01575
CG1019-RB	1	1	24	13	CG1019-RB	0.788552	0.784857	0.842439	0.818539	1	0.790269	0.496093	1	0.504484	0.350146	0.533459	0.532967	Mlp84B	0.703484	18C	2.01575	2.85595	2.01575
CG10192-RA	0.300911	1	24	23	CG10192-RA	0.959497	0.764906	0.639942	0.9474	1	0.932882	1	0.870149	0.869173	0.711816	0.999716	0.932595	eIF4G2	0.885673	18C	1.56264	1.40486	1.40486
CG10194-RA	1	1	24	21	CG10194-RA	0.263862	0.554767	0.62112	0.248129	1	0.586383	0.426063	1	0.589294	0.52742	0.728223	0.894342	CG10194	0.619967	18C	4.03017	1.89602	1.89602
CG10195-RA	1	1	24	21	CG10195-RA	0.102853	0.756866	0.645632	0.169261	0.779598	1	0.531884	0.420503	0.384343	0.836083	1	0.134819	CG10195	0.563487	18C	9.72261	7.41736	7.41736
CG10198-RA	1	1	24	15	CG10198-RA	0.29318	0.647228	0.368071	0.482472	1	0.114019	0.405968	0.786656	0.733389	0.585599	1	0.756637	Nup98-96	0.597768	18C	8.77048	1.70765	1.70765
CG10200-RA	1	1	24	21	CG10200-RA	0.936979	0.802431	0.823935	0.86845	1	0.670152	0.696294	1	0.752059	0.972911	0.891001	0.947832	hui	0.863504	18C	1.4922	1.32968	1.32968
CG10200-RB	1	1	24	21	CG10200-RB	0.936979	0.802431	0.823935	0.86845	1	0.670152	0.696294	1	0.752059	0.972911	0.891001	0.947832	hui	0.863504	18C	1.4922	1.32968	1.32968
CG10203-RA	1	1	24	9	CG10203-RA	0.994341	1	0.780213	0.71999	0.979788	0.928088	0.584745	1	0.876547	0.657114	0.956911	0.756857	x16	0.852883	18C	1.71015	1.52181	1.52181
CG10205-RA	1	1	24	3	CG10205-RA	0.805473	0.929964	0.68868	0.740468	1	0.928954	0.726885	1	0.891699	0.825324	0.675954	0.870477	CG10205	0.840323	18C	1.45205	1.47939	1.45205
CG10205-RB	1	1	24	3	CG10205-RB	0.805473	0.929964	0.68868	0.740468	1	0.928954	0.726885	1	0.891699	0.825324	0.677665	0.870477	CG10205	0.840466	18C	1.45205	1.47566	1.45205
CG10206-RA	1	1	24	21	CG10206-RA	0.492293	1	0.917413	0.886094	0.757949	0.957274	0.355703	0.703041	0.333649	1	0.607965	0.962302	nop5	0.747807	18C	2.81133	2.99716	2.81133
CG10208-RA	1	1	24	11	CG10208-RA	0.836779	0.427613	0.687848	1	0.22652	0.58112	0.665043	0.802035	0.661795	0.744183	0.452748	1	CG10208	0.673807	18C	4.41462	2.20874	2.20874
CG1021-RD	1	1	24	9	CG1021-RD	0.886882	1	0.853033	0.564968	0.921609	0.445048	0.415163	0.833588	1	0.261043	0.523748	0.526167	Dmtn	0.685937	18C	2.40869	3.83079	2.40869
CG1021-RE	1	1	24	9	CG1021-RE	0.886882	1	0.853033	0.564968	0.921609	0.445048	0.415163	0.833588	1	0.261043	0.523748	0.526167	Dmtn	0.685937	18C	2.40869	3.83079	2.40869
CG1021-RF	1	1	24	9	CG1021-RF	0.886882	1	0.853033	0.564968	0.921609	0.445048	0.415163	0.833588	1	0.261043	0.523748	0.526167	Dmtn	0.685937	18C	2.40869	3.83079	2.40869
CG1021-RG	1	1	24	9	CG1021-RG	0.886882	1	0.853033	0.564968	0.921609	0.445048	0.415163	0.833588	1	0.261043	0.523748	0.526167	Dmtn	0.685937	18C	2.40869	3.83079	2.40869
CG1021-RH	1	1	24	9	CG1021-RH	0.886882	1	0.853033	0.564968	0.921609	0.445048	0.415163	0.833588	1	0.261043	0.523748	0.526167	Dmtn	0.685937	18C	2.40869	3.83079	2.40869
CG10210-RA	1	1	24	5	CG10210-RA	0.618549	1	0.92657	0.87911	0.532776	0.87475	0.36417	0.399875	0.794937	0.343469	0.414957	1	tst	0.679097	18C	2.74597	2.91147	2.74597
CG10211-RA	0.170207	1	24	11	CG10211-RA	0.597398	0.586144	1	0.737332	0.981091	0.425939	0.697956	0.919665	1	0.340491	0.390791	0.305024	CG10211	0.665152	18C	2.34775	3.27843	2.34775
CG10212-RA	1	1	24	21	CG10212-RA	0.791585	0.809035	0.62112	0.325669	1	0.256542	0.23671	0	0.14254	0.744183	0.0674305	1	SMC2	0.499568	18C	4.22457	Inf	4.22457
CG10214-RA	1	1	24	13	CG10214-RA	0.550481	0.879457	0.949124	0.756904	0.892146	1	0.999682	0.997906	0.766158	1	0.802547	0.729467	CG10214	0.860323	18C	1.81659	1.37086	1.37086
CG10215-RA	0.0454225	1	24	1	CG10215-RA	0.542836	0.385441	0.448356	0.352626	0.649665	1	0.901753	0.5941	0.305444	0.318936	0.288988	1	Ercc1	0.565679	18C	2.83587	3.46035	2.83587
CG10217-RA	1	1	24	3	CG10217-RA	1	0.636812	0.724295	0.474708	0.801702	0.822682	0.497226	1	0.520038	0.974948	0.581479	0.862339	CG10217	0.741352	18C	2.10656	1.92294	1.92294
CG10217-RB	1	1	24	3	CG10217-RB	1	0.636812	0.724295	0.474708	0.801702	0.822682	0.497226	1	0.520038	0.974948	0.581479	0.862339	CG10217	0.741352	18C	2.10656	1.92294	1.92294
CG10219-RA	0.576952	1	24	23	CG10219-RA	0.75185	0.737687	0.8094	0.900743	0.757942	1	0.751567	0.765637	0.712681	0.677944	1	0.836416	CG10219	0.808489	18C	1.35559	1.47505	1.35559
CG10221-RA	0.0454225	1	24	15	CG10221-RA	0.623242	0.764377	0.660189	1	0.944801	0.484763	0.669102	0.664625	0.911207	1	0.888507	0.704493	Hrd3	0.776276	18C	2.06286	1.50461	1.50461
CG10222-RA	1	1	24	3	CG10222-RA	0.877733	0.952287	0.58276	1	0.511767	0.39387	0.253618	0.668362	0.254536	0.372091	0.192659	1	CG10222	0.588307	18C	3.94294	5.19053	3.94294
CG10223-RA	0.880418	1	24	15	CG10223-RA	0.963876	0.976558	0.690543	1	0.476473	0.814904	0.405397	0.431448	0.704189	1	0.959401	0.553311	Top2	0.748008	18C	2.46672	2.31778	2.31778
CG10225-RA	1	1	24	13	CG10225-RA	1	0.536573	0.882735	0.61712	0.710599	0.48613	0.306799	1	0.525068	0.609178	0.386384	0.532081	RanBP3	0.632722	18C	3.25946	2.5881	2.5881
CG10226-RA	0.663955	1	24	7	CG10226-RA	0.790652	1	0.969356	0.948747	0.749115	0.99293	0.998277	1	0.664412	0.803881	0.982838	0.873054	CG10226	0.897772	18C	1.33491	1.50509	1.33491
CG10228-RA	1	1	24	21	CG10228-RA	1	0.564814	0.474922	0.736214	0.199466	0.255858	0.540954	0.655767	0.449531	1	0.961577	0.904978	Inr-a	0.64534	18C	5.01337	2.22454	2.22454
CG10229-RA	1	1	24	9	CG10229-RA	0.5824	1	0.761636	0.543109	0.95646	0.679493	1	0.76424	0.361303	0.452715	0.71786	0.456254	Kat60	0.689623	18C	1.84125	2.76776	1.84125
CG10230-RA	0.772187	1	24	13	CG10230-RA	0.547031	0.937297	0.775138	0.595736	1	0.588171	0.500347	0.426596	1	0.521018	0.55239	0.391666	Rpn9	0.652949	18C	1.99861	2.5532	1.99861
CG10230-RB	0.772187	1	24	13	CG10230-RB	0.547031	0.937297	0.775138	0.595736	1	0.588171	0.496951	0.426596	1	0.521018	0.55239	0.391666	Rpn9	0.652666	18C	2.01227	2.5532	2.01227
CG10233-RA	1	1	24	21	CG10233-RA	0.874063	0.977273	0.866164	0.864903	0.899536	1	0.795156	0.731357	0.890263	0.93921	0.660354	1	rtp	0.874857	18C	1.25761	1.51434	1.25761
CG10234-RA	0.576952	1	24	15	CG10234-RA	0.571701	0.593292	0.93168	0.506596	1	0.855142	0.300231	0.741752	1	0.955682	0.705585	0.570757	Hs2st	0.727701	18C	3.33077	1.75206	1.75206
CG10236-RA	1	1	24	13	CG10236-RA	0.816954	0.941838	1	0.645323	0.309614	0.444804	0.706846	0.706046	0.720848	1	0.915844	0.910286	LanA	0.759867	18C	3.22982	1.41634	1.41634
CG10237-RA	0.0363147	1	24	19	CG10237-RA	0.673085	0.788688	0.82816	0.993257	1	0.847973	0.637874	0.695	0.759183	0.950451	0.900601	1	CG10237	0.839523	18C	1.56771	1.43885	1.43885
CG10237-RB	0.0363147	1	24	19	CG10237-RB	0.673085	0.788688	0.82816	0.993257	1	0.847973	0.637874	0.695	0.759183	0.950451	0.900601	1	CG10237	0.839523	18C	1.56771	1.43885	1.43885
CG10237-RC	0.0363147	1	24	19	CG10237-RC	0.673085	0.788688	0.835599	0.993257	1	0.854117	0.637874	0.695	0.759183	0.950451	0.900601	1	CG10237	0.840655	18C	1.56771	1.43885	1.43885
CG10240-RA	0.576952	1	24	3	CG10240-RA	1	0.749499	0.653878	0.319988	0.842192	0.972261	0.544253	0.860565	0.602212	0.423486	1	0.638038	Cyp6a22	0.717198	18C	3.12511	2.36136	2.36136
CG10242-RA	1	1	24	1	CG10242-RA	1	0.835521	0.814078	0.647976	0.781659	0.437517	0.781411	0.542439	0.671386	0.704637	0.850211	1	Cyp6a23	0.75557	18C	2.28562	1.84353	1.84353
CG10244-RA	1	1	24	13	CG10244-RA	0.81536	1	0.213258	0.782716	0.515017	0.396371	0.49895	0.903986	0.507016	1	0.932751	0.513789	Cad96Ca	0.673268	18C	4.68915	1.97232	1.97232
CG10245-RB	0.113223	1	24	21	CG10245-RB	0.445697	0.346897	0.484224	0.832198	0.877048	1	0.63754	0.60717	0.661388	0.571533	0.760616	1	Cyp6a20	0.685359	18C	2.8827	1.74968	1.74968
CG10246-RB	1	1	24	13	CG10246-RB	0.428554	0.840963	0.672533	0.282101	0.487249	1	0.293936	0.594792	0.635304	1	0.601077	0.558789	Cyp6a9	0.616275	18C	3.54483	1.78958	1.78958
CG10247-RA	0.0120563	1	24	1	CG10247-RA	1	0.687557	0.285328	0.822827	0.80391	0.824949	0.977958	0.805382	0.271028	0.72322	0.902239	1	Cyp6a21	0.7587	18C	3.50473	3.68966	3.50473
CG10248-RA	1	1	24	13	CG10248-RA	0.326144	1	0.447842	0.20127	0.30901	0.634194	0.429157	0.0997906	0.433244	1	0.302034	0.0959825	Cyp6a8	0.439889	18C	4.96845	10.4186	4.96845
CG10249-RA	1	1	24	21	CG10249-RA	0.395793	0.485421	0.496896	0.434225	1	0.256542	0.530135	0.643387	0.201621	1	0.405361	0.548111	CG10249	0.533124	18C	3.89799	4.95981	3.89799
CG10249-RB	1	1	24	21	CG10249-RB	0.395793	0.485421	0.496896	0.434225	1	0.256542	0.530135	0.643387	0.201621	1	0.405361	0.548111	CG10249	0.533124	18C	3.89799	4.95981	3.89799
CG10249-RC	1	1	24	21	CG10249-RC	0.395793	0.485421	0.496896	0.434225	1	0.256542	0.530135	0.643387	0.201621	1	0.405361	0.548111	CG10249	0.533124	18C	3.89799	4.95981	3.89799
CG10249-RD	1	1	24	21	CG10249-RD	0.395793	0.485421	0.496896	0.434225	1	0.256542	0.530135	0.643387	0.201621	1	0.405361	0.548111	CG10249	0.533124	18C	3.89799	4.95981	3.89799
CG10250-RA	1	1	24	13	CG10250-RA	0.40768	1	0.319887	0.33545	0	0.792742	0.706846	0.46569	0.957697	1	0.453051	0.223959	nau	0.55525	18C	Inf	4.4651	4.4651
CG10251-RB	1	1	24	9	CG10251-RB	1	0.5749	0.58849	0.668547	0.592166	0.364598	1	0.0968864	0.504762	0.249659	0.201081	0.354119	prt	0.516267	18C	2.74275	10.3214	2.74275
CG10253-RA	0.0931041	1	24	9	CG10253-RA	0.89146	1	0.750669	0.483048	0.659222	0.465075	0.990565	0.998112	1	0.787708	0.846533	0.393856	CG10253	0.772187	18C	2.15019	2.539	2.15019
CG10254-RA	0.113223	1	24	23	CG10254-RA	0.877276	0.408114	0.450993	0.572499	0.745204	1	0.720423	0.723252	0.883131	0.566226	0.879529	1	CG10254	0.735554	18C	2.45029	1.76608	1.76608
CG10254-RB	0.113223	1	24	23	CG10254-RB	0.877276	0.408114	0.450993	0.572499	0.745204	1	0.720423	0.723252	0.883131	0.566226	0.879529	1	CG10254	0.735554	18C	2.45029	1.76608	1.76608
CG10255-RA	1	1	24	1	CG10255-RA	0.921711	1	0.667591	0.64173	0.940466	0.689341	0.795698	0.246695	0.718721	0.397307	1	0.652523	Lap1	0.722649	18C	1.55829	4.05358	1.55829
CG10257-RA	0.772187	1	24	23	CG10257-RA	0.548855	0.769309	0.3999	1	0.891466	0.686096	0.613693	0.485182	0.50681	0.545734	0.269722	1	CG10257	0.643064	18C	2.50063	3.70752	2.50063
CG10260-RB	1	1	24	1	CG10260-RB	0.715763	0.650948	0.870996	0.588949	1	0.731293	0.831054	0.830509	0.716919	0.775007	0.698245	1	PI4KIIIalpha	0.78414	18C	1.69794	1.43216	1.43216
CG10261-RA	0.576952	1	24	9	CG10261-RA	0.732808	0.781525	1	0.681623	0.603748	0.991277	0.279604	1	0.703544	0.310801	0.48643	0.506231	aPKC	0.673133	18C	3.57649	3.21749	3.21749
CG10261-RB	1	1	24	13	CG10261-RB	0.527724	0.566324	0.10352	0.542781	1	0.256542	0.35623	1	0.727475	0.423627	0.529448	0.510364	aPKC	0.545336	18C	9.65997	2.36056	2.36056
CG10261-RC	1	1	24	13	CG10261-RC	0.527724	0.566324	0.10352	0.542781	1	0.256542	0.35623	1	0.727475	0.423627	0.529448	0.510364	aPKC	0.545336	18C	9.65997	2.36056	2.36056
CG10261-RD	1	1	24	13	CG10261-RD	0.527724	0.566324	0.10352	0.542781	1	0.256542	0.279604	1	0.703544	0.310801	0.48643	0.506231	aPKC	0.523625	18C	9.65997	3.21749	3.21749
CG10261-RE	1	1	24	13	CG10261-RE	0.527724	0.566324	0.10352	0.542781	1	0.256542	0.35623	1	0.727475	0.423627	0.529448	0.510364	aPKC	0.545336	18C	9.65997	2.36056	2.36056
CG10261-RF	1	1	24	13	CG10261-RF	0.527724	0.566324	0.10352	0.542781	1	0.256542	0.279604	1	0.703544	0.310801	0.48643	0.506231	aPKC	0.523625	18C	9.65997	3.21749	3.21749
CG10263-RA	1	1	24	1	CG10263-RA	0.479749	0.794325	0.639942	0.434225	1	0.373153	0.97512	0.616738	0.458009	0.698965	1	0.593203	Hakai	0.671952	18C	2.67987	2.18337	2.18337
CG10263-RC	1	1	24	1	CG10263-RC	0.479749	0.794325	0.639942	0.434225	1	0.373153	0.97512	0.616738	0.458009	0.698965	1	0.593203	Hakai	0.671952	18C	2.67987	2.18337	2.18337
CG10263-RD	1	1	24	1	CG10263-RD	0.479749	0.794325	0.639942	0.434225	1	0.373153	0.97512	0.616738	0.458009	0.698965	1	0.593203	Hakai	0.671952	18C	2.67987	2.18337	2.18337
CG10265-RA	1	1	24	3	CG10265-RA	0.405107	0.248423	0.317869	1	0	0.78774	1	0.263531	0.505825	0.0754525	0.307654	0.506949	CG10265	0.451546	18C	Inf	13.2534	13.2534
CG10265-RB	1	1	24	3	CG10265-RB	0.405107	0.248423	0.317869	1	0	0.78774	1	0.263531	0.505825	0.0754525	0.307654	0.506949	CG10265	0.451546	18C	Inf	13.2534	13.2534
CG10267-RA	0.113223	1	24	1	CG10267-RA	0.374011	0.487376	0.330153	0.346215	0.797316	1	0.838349	0.552327	0.534527	0.883717	0.779665	1	Zif	0.660305	18C	3.0289	1.87081	1.87081
CG10268-RA	1	1	24	1	CG10268-RA	0.342844	0.0525602	0.20176	0.14105	0	1	0.899521	0.182347	1	0.391564	0.886992	0.0876944	CG10268	0.432194	18C	Inf	11.4032	11.4032
CG10269-RA	0.141715	1	24	11	CG10269-RA	0.243064	0.447161	0.953607	1	0	0.472644	0.423304	0.858105	1	0.399242	0.306099	0.247608	D19A	0.529236	18C	Inf	4.03865	4.03865
CG10270-RA	0.576952	1	24	9	CG10270-RA	0.81536	1	0.995205	0.969078	0.171672	0.35233	0.709681	0.523664	1	0.535472	0.776308	0.971384	D19B	0.735013	18C	5.82505	1.90962	1.90962
CG10275-RB	1	1	24	23	CG10275-RB	1	0.451851	0.536868	0.281493	0.398933	0.409373	0.375731	0.0990166	0.678764	0.460685	0.385317	1	kon	0.506503	18C	3.55248	10.0993	3.55248
CG10277-RA	0.576952	1	24	9	CG10277-RA	1	0.966296	0.90354	0.972432	0.976177	0.766024	0.811523	1	0.970566	0.892959	0.5073	0.780899	godzilla	0.878976	18C	1.30544	1.97122	1.30544
CG10277-RB	0.576952	1	24	9	CG10277-RB	1	0.708617	0.941584	0.676547	0.968521	0.561751	0.811523	1	0.970566	0.892959	0.5073	0.780899	godzilla	0.818355	18C	1.78015	1.97122	1.78015
CG10277-RC	0.576952	1	24	9	CG10277-RC	1	0.708617	0.941584	0.676547	0.968521	0.561751	0.811523	1	0.970566	0.892959	0.5073	0.780899	godzilla	0.818355	18C	1.78015	1.97122	1.78015
CG10277-RD	0.576952	1	24	9	CG10277-RD	1	0.708617	0.941584	0.676547	0.968521	0.561751	0.811523	1	0.970566	0.892959	0.5073	0.780899	godzilla	0.818355	18C	1.78015	1.97122	1.78015
CG10279-RA	0.421631	1	24	19	CG10279-RA	0.886959	0.768413	0.841069	1	0.879699	0.990791	0.802473	0.809479	0.971078	0.879983	0.967981	1	Rm62	0.899827	18C	1.30138	1.23536	1.23536
CG10279-RB	0.421631	1	24	19	CG10279-RB	0.886959	0.768413	0.841069	1	0.879699	0.990791	0.802473	0.809479	0.971078	0.879983	0.967981	1	Rm62	0.899827	18C	1.30138	1.23536	1.23536
CG10279-RC	0.421631	1	24	19	CG10279-RC	0.886959	0.768413	0.841069	1	0.879699	0.990791	0.802473	0.809479	0.971078	0.879983	0.967981	1	Rm62	0.899827	18C	1.30138	1.23536	1.23536
CG10279-RD	0.421631	1	24	19	CG10279-RD	0.886959	0.768413	0.841069	1	0.879699	0.990791	0.802473	0.809479	0.971078	0.879983	0.967981	1	Rm62	0.899827	18C	1.30138	1.23536	1.23536
CG10279-RE	0.421631	1	24	19	CG10279-RE	0.888705	0.756913	0.840366	1	0.870804	0.989599	0.802473	0.809479	0.971078	0.879983	0.967981	1	Rm62	0.898115	18C	1.32116	1.23536	1.23536
CG10279-RF	0.421631	1	24	19	CG10279-RF	0.886959	0.768413	0.841069	1	0.879699	0.990791	0.802473	0.809479	0.971078	0.879983	0.967981	1	Rm62	0.899827	18C	1.30138	1.23536	1.23536
CG10281-RA	0.576952	1	24	13	CG10281-RA	0.649247	0.914237	1	0.949721	0.956884	0.467583	0.636162	0.963977	0.708696	1	0.380563	0.954066	TfIIFalpha	0.798428	18C	2.13866	2.62769	2.13866
CG10283-RA	0.421631	1	24	13	CG10283-RA	0.566421	0.651271	1	0.6991	0.536665	0.413032	0.678572	0.866183	0.536311	1	0.670515	0.537502	CG10283	0.679631	18C	2.42112	1.86459	1.86459
CG10283-RB	0.576952	1	24	11	CG10283-RB	0.566421	0.651271	1	0.640842	0.536665	0.413032	0.678572	0.866183	0.536311	1	0.670515	0.537502	CG10283	0.674776	18C	2.42112	1.86459	1.86459
CG10286-RA	1	1	24	3	CG10286-RA	1	0.432866	0.415405	0.871228	0.445866	0.915069	0.639066	0.976034	0.472289	1	0.620617	0.533821	CG10286	0.693522	18C	2.40729	2.11735	2.11735
CG10287-RA	0.209359	1	24	11	CG10287-RA	0.821142	1	0.825808	0.485332	0.723215	0.652185	0.418623	0.515131	1	0.39809	0.354797	0.254314	Gasp	0.62072	18C	2.38878	3.93215	2.38878
CG10287-RB	0.772187	1	24	13	CG10287-RB	0.676152	1	0.749004	0.62181	0.90442	0.618726	0.447912	0.378614	1	0.470276	0.245559	0.246348	Gasp	0.613235	18C	2.23258	4.07234	2.23258
CG10289-RA	0.772187	1	24	15	CG10289-RA	0.607661	0.894321	0.667525	1	0.921181	0.708966	0.481349	0.507401	1	0.590184	0.287951	0.488039	CG10289	0.679548	18C	2.0775	3.47281	2.0775
CG10293-RA	0.0931041	1	24	15	CG10293-RA	0.500427	0.832946	0.785323	1	0.948275	0.834078	0.722023	0.824527	1	0.862576	0.925557	0.396531	how	0.802689	18C	1.99829	2.52187	1.99829
CG10293-RC	1	1	24	15	CG10293-RC	0.442088	0.536667	0.552185	0.452846	0.718051	1	0.966716	0.534173	0.92953	1	0.666251	0.395222	how	0.682811	18C	2.26199	2.53022	2.26199
CG10295-RA	0.248511	1	24	3	CG10295-RA	1	0.70083	0.448373	0.822827	0	0.555578	1	0.371646	0.277926	0.290202	0.350603	0.812418	Pak	0.552534	18C	Inf	3.59808	3.59808
CG10295-RB	0.248511	1	24	3	CG10295-RB	1	0.70083	0.448373	0.822827	0	0.555578	1	0.371646	0.277926	0.290202	0.350603	0.812418	Pak	0.552534	18C	Inf	3.59808	3.59808
CG10295-RC	0.248511	1	24	3	CG10295-RC	1	0.70083	0.448373	0.822827	0	0.555578	1	0.371646	0.277926	0.290202	0.350603	0.812418	Pak	0.552534	18C	Inf	3.59808	3.59808
CG10295-RD	1	1	24	3	CG10295-RD	0.486129	0.521687	0.667525	1	0.460591	0.472644	1	0.371646	0.277926	0.290202	0.350603	0.812418	Pak	0.559281	18C	2.17113	3.59808	2.17113
CG10297-RA	0.170207	1	24	11	CG10297-RA	0.845873	0.650118	1	0.371204	0.705263	0.197378	0.409476	0.699415	1	0.243163	0.375858	0.326752	Acp65Aa	0.568708	18C	5.06642	4.11247	4.11247
CG1030-RA	1	1	24	13	CG1030-RA	0.78428	1	0.965585	0.892448	0.710672	0.580157	0.157807	0.970363	0.332594	0.843407	0.134861	1	Scr	0.697681	18C	6.33686	7.41504	6.33686
CG1030-RB	1	1	24	13	CG1030-RB	0.78428	1	0.965585	0.892448	0.710672	0.580157	0.157807	0.970363	0.332594	0.843407	0.134861	1	Scr	0.697681	18C	6.33686	7.41504	6.33686
CG10302-RA	1	1	24	13	CG10302-RA	0.676714	0.914647	0.834406	1	0.680418	0.67137	0.860765	0.787632	0.777493	0.894523	0.694739	1	bsf	0.816059	18C	1.48949	1.43939	1.43939
CG10305-RA	1	1	24	13	CG10305-RA	0.811923	0.928405	0.902937	1	0.813886	0.799918	0.753618	0.964924	0.790706	0.93676	0.956636	1	RpS26	0.888309	18C	1.32693	1.26469	1.26469
CG10305-RB	1	1	24	13	CG10305-RB	0.811923	0.928405	0.902937	1	0.813886	0.799918	0.753618	0.964924	0.790706	0.93676	0.956636	1	RpS26	0.888309	18C	1.32693	1.26469	1.26469
CG10305-RC	1	1	24	13	CG10305-RC	0.811923	0.928405	0.902937	1	0.813886	0.799918	0.75353	0.964751	0.790531	0.936607	0.956368	1	RpS26	0.888238	18C	1.32709	1.26497	1.26497
CG10306-RA	1	1	24	21	CG10306-RA	0.81714	0.800473	0.790597	1	0.721723	0.767542	0.861193	0.892921	0.765127	0.865501	0.861985	1	CG10306	0.84535	18C	1.38557	1.30697	1.30697
CG10307-RA	1	1	24	21	CG10307-RA	0.370271	0.668565	0.742477	0.778598	0.740618	1	0.562166	1	0.964785	0.689274	0.816722	0.854968	CG10307	0.765704	18C	2.70072	1.4508	1.4508
CG1031-RA	0.0592039	1	24	21	CG1031-RA	0.703631	0.701164	0.62112	0.687523	1	0.940656	0.564559	0.508025	0.621881	1	0.870799	0.794037	alpha-Est1	0.751116	18C	1.77129	1.96841	1.77129
CG10311-RA	1	1	24	13	CG10311-RA	1	0.915857	0.99865	0.790769	0.787504	0.883873	0.65776	0.931379	0.713839	1	0.616652	0.765194	CG10311	0.838456	18C	1.52031	1.62166	1.52031
CG10315-RA	0.772187	1	24	19	CG10315-RA	0.574632	0.524974	0.634923	0.800904	1	0.501683	0.885682	0.680763	1	0.765726	0.904075	0.810686	eIF2B-delta	0.757004	18C	1.99329	1.46894	1.46894
CG10315-RB	0.772187	1	24	19	CG10315-RB	0.574632	0.524974	0.634923	0.800904	1	0.501683	0.885682	0.680763	1	0.765726	0.904075	0.810686	eIF2B-delta	0.757004	18C	1.99329	1.46894	1.46894
CG10315-RC	0.772187	1	24	19	CG10315-RC	0.574632	0.524974	0.634923	0.800904	1	0.501683	0.885682	0.680763	1	0.765726	0.904075	0.810686	eIF2B-delta	0.757004	18C	1.99329	1.46894	1.46894
CG10318-RA	1	1	24	1	CG10318-RA	0.484014	0.612171	0.474729	0.522716	0.630557	1	0.614821	0.836255	0.698657	0.486345	1	0.150814	NC2alpha	0.625924	18C	2.10646	6.63067	2.10646
CG10320-RA	1	1	24	21	CG10320-RA	0.868036	1	0.889089	0.905138	0.849512	0.857578	0.717301	0.724741	0.646829	0.708081	1	0.738475	CG10320	0.825398	18C	1.39412	1.546	1.39412
CG10320-RB	1	1	24	21	CG10320-RB	0.868036	1	0.889089	0.905138	0.849512	0.857578	0.717301	0.724741	0.647189	0.708081	1	0.738475	CG10320	0.825428	18C	1.39412	1.54514	1.39412
CG10320-RC	1	1	24	21	CG10320-RC	0.868036	1	0.889089	0.905138	0.849512	0.857578	0.717301	0.724741	0.646829	0.707329	1	0.738475	CG10320	0.825336	18C	1.39412	1.546	1.39412
CG10324-RA	0.576952	1	24	1	CG10324-RA	0.598087	0.636441	0.483093	0.550019	1	0.649908	0.375731	0.544592	0.543011	0.106312	0.353208	1	CG10324	0.570033	18C	2.66148	9.40629	2.66148
CG10326-RA	0.576952	1	24	1	CG10326-RA	0.580496	0.647228	0.483093	0.535544	1	0.649908	0.591776	0.600502	0.761854	0.577383	0.767313	1	CG10326	0.682925	18C	2.06999	1.73195	1.73195
CG10327-RA	1	1	24	13	CG10327-RA	0.708938	0.838426	0.87414	1	0.191913	0.590805	0.878907	0.386032	0.667868	1	0.619964	0.495068	TBPH	0.687672	18C	5.2107	2.59046	2.59046
CG10327-RB	1	1	24	13	CG10327-RB	0.708938	0.838426	0.87414	1	0.191913	0.590805	0.878907	0.386032	0.667868	1	0.619964	0.495068	TBPH	0.687672	18C	5.2107	2.59046	2.59046
CG10327-RC	1	1	24	15	CG10327-RC	0.719623	0.55897	0.752873	0.39475	1	0.466441	0.878907	0.386032	0.667868	1	0.619964	0.495068	TBPH	0.661708	18C	2.53325	2.59046	2.53325
CG10327-RD	1	1	24	13	CG10327-RD	0.708938	0.838426	0.87414	1	0.191913	0.590805	0.878907	0.386032	0.667868	1	0.619964	0.495068	TBPH	0.687672	18C	5.2107	2.59046	2.59046
CG10328-RA	1	1	24	21	CG10328-RA	0.253192	0.310528	0.43707	1	0.479782	0.196935	0.789034	0.563157	0.415743	0.775191	0.758593	1	nonA-l	0.581602	18C	5.07782	2.40533	2.40533
CG10333-RA	1	1	24	3	CG10333-RA	1	0.739479	0.646185	0.701823	0.557333	0.686302	0.827663	0.94015	0.902268	0.915205	1	0.940444	CG10333	0.821404	18C	1.79426	1.10832	1.10832
CG10334-RA	1	1	24	3	CG10334-RA	0.94758	1	0.639775	0.852224	0.626372	0.89987	1	0.473004	0.642703	0.58645	0.662859	0.381836	spi	0.726056	18C	1.5965	2.61892	1.5965
CG10334-RB	1	1	24	3	CG10334-RB	0.94758	1	0.639775	0.852224	0.626372	0.89987	1	0.473004	0.642703	0.58645	0.662859	0.381836	spi	0.726056	18C	1.5965	2.61892	1.5965
CG10334-RE	1	1	24	3	CG10334-RE	0.94758	1	0.639775	0.852224	0.626372	0.89987	1	0.473004	0.642703	0.58645	0.662859	0.381836	spi	0.726056	18C	1.5965	2.61892	1.5965
CG10334-RF	1	1	24	3	CG10334-RF	0.94758	1	0.639775	0.852224	0.626372	0.89987	1	0.473004	0.642703	0.58645	0.662859	0.381836	spi	0.726056	18C	1.5965	2.61892	1.5965
CG10334-RG	1	1	24	3	CG10334-RG	0.94758	1	0.639775	0.852224	0.626372	0.89987	1	0.473004	0.642703	0.58645	0.662859	0.381836	spi	0.726056	18C	1.5965	2.61892	1.5965
CG10335-RA	1	1	24	3	CG10335-RA	0.18816	1	0.442921	0.464469	0.35655	0.853722	1	0.282355	0.150543	0.538947	0.386603	0.633686	Pbgs	0.52483	18C	5.31463	6.64262	5.31463
CG10337-RA	1	1	24	3	CG10337-RA	0.647974	0.630722	0.621421	0.863229	0.526229	1	1	0.376473	0.516148	0.40421	0.24417	0.543159	CG10337	0.614478	18C	1.90031	4.0955	1.90031
CG10338-RA	0.772187	1	24	9	CG10338-RA	0.996551	1	0.995205	0.596355	0.171672	0.528495	0.575575	0.478995	0.793521	1	0.207109	0.921432	CG10338	0.688742	18C	5.82505	4.82838	4.82838
CG10339-RA	0.113223	1	24	15	CG10339-RA	0.211089	0.582505	0.662528	0.69476	1	0	0.195024	0.685265	0.293595	0.919691	1	0.247168	CG10339	0.540969	18C	Inf	4.04583	4.04583
CG10340-RA	1	1	24	9	CG10340-RA	0.923516	0.770963	0.858607	0.804594	1	0.920535	0.650865	1	0.599249	0.568835	0.728034	0.442701	CG10340	0.772325	18C	1.53642	2.25886	1.53642
CG10341-RA	1	1	24	15	CG10341-RA	0.904669	0.855266	0.798583	0.930482	1	0.659681	0.590274	1	0.628379	0.775433	0.954844	0.587791	CG10341	0.807117	18C	1.69413	1.70129	1.69413
CG10342-RA	1	1	24	5	CG10342-RA	0.845442	0.810074	0.538995	1	0.500642	0.308246	0.852157	0.790153	0.912259	0.595346	0.890083	1	NPF	0.753616	18C	3.24416	1.67969	1.67969
CG10343-RA	0.300911	1	24	11	CG10343-RA	0.89961	0.988399	1	0.647696	0.781321	0.72888	0.573409	1	0.97494	0.747597	0.994479	0.427484	CG10343	0.813651	18C	1.74395	2.33927	1.74395
CG10344-RA	0.421631	1	24	19	CG10344-RA	0.151915	0.279475	0.357603	1	0.863607	0.295403	0.526023	0	0.712702	0.248061	0.674305	1	CG10344	0.509091	18C	6.58262	Inf	6.58262
CG10344-RB	0.421631	1	24	19	CG10344-RB	0.151915	0.279475	0.357603	1	0.863607	0.295403	0.526023	0	0.712702	0.248061	0.674305	1	CG10344	0.509091	18C	6.58262	Inf	6.58262
CG10345-RA	1	1	24	9	CG10345-RA	1	0.899399	0.784653	0.666098	0.59555	0.592616	0.94653	0.846314	1	0.956493	0.787234	0.867572	CG10345	0.828538	18C	1.68743	1.27027	1.27027
CG10346-RA	1	1	24	9	CG10346-RA	0.546192	0.781525	1	0.599229	0.517498	0.354027	1	0.08501	0.349649	0	0.0827028	0.0817659	Grip71	0.4498	18C	2.82464	Inf	2.82464
CG10348-RA	1	1	24	1	CG10348-RA	0.29318	0.719142	0.138027	0.192989	1	0.912151	0.319357	0.252481	1	0.0803209	0.254726	0.296812	CG10348	0.454932	18C	7.24498	12.4501	7.24498
CG10353-RC	0.772187	1	24	1	CG10353-RC	0.603703	0.548454	0.631596	0.551936	0.720281	1	1	0.755714	0.425063	0.818327	0.502703	0.782789	CG10353	0.695047	18C	1.82331	2.35259	1.82331
CG10353-RD	0.772187	1	24	1	CG10353-RD	0.603703	0.548454	0.631596	0.551936	0.720281	1	1	0.755714	0.425063	0.818327	0.502703	0.782789	CG10353	0.695047	18C	1.82331	2.35259	1.82331
CG10354-RA	1	1	24	9	CG10354-RA	0.784276	0.45088	1	0.282329	0.743074	0.857836	0.698814	0.60328	0.957697	1	0.411864	0.0916197	Rat1	0.656806	18C	3.54197	10.9147	3.54197
CG10360-RA	1	1	24	13	CG10360-RA	0.663581	0.758984	0.585035	1	0.565142	0.898894	0.774972	0.905659	1	0.85274	0.733247	0.812635	ref(2)P	0.795907	18C	1.76947	1.3638	1.3638
CG10360-RB	1	1	24	13	CG10360-RB	0.663581	0.758984	0.585035	1	0.565142	0.898894	0.774972	0.905659	1	0.85274	0.733247	0.812635	ref(2)P	0.795907	18C	1.76947	1.3638	1.3638
CG10361-RA	1	1	24	21	CG10361-RA	0.571701	0.557335	0.586613	0.542781	1	0.598599	0.707179	1	0.690698	0.840504	0.756669	0.983699	CG10361	0.736315	18C	1.84236	1.44781	1.44781
CG10362-RA	1	1	24	15	CG10362-RA	0.543573	1	0.938336	0.53672	0.61802	0.634194	0.549251	0.440527	0.301984	0.698214	1	0.453982	CG10362	0.6429	18C	1.86317	3.31144	1.86317
CG10363-RA	0.576952	1	24	5	CG10363-RA	1	0.876038	0.896747	0.849275	0.751205	0.923648	0.748589	1	0.601484	0.618304	0.657406	0.74477	Tep4	0.805622	18C	1.33585	1.66256	1.33585
CG10365-RA	1	1	24	1	CG10365-RA	0.642832	0.733214	0.786864	0.677042	0.609061	1	1	0.468257	0.776355	0.545628	0.741591	0.597026	CG10365	0.714823	18C	1.64187	2.13558	1.64187
CG10365-RB	1	1	24	1	CG10365-RB	0.642832	0.733214	0.786864	0.677042	0.609061	1	1	0.468257	0.776355	0.545628	0.741591	0.597026	CG10365	0.714823	18C	1.64187	2.13558	1.64187
CG10365-RC	1	1	24	1	CG10365-RC	0.642832	0.733214	0.786864	0.677042	0.609061	1	1	0.468257	0.776355	0.545628	0.741591	0.597026	CG10365	0.714823	18C	1.64187	2.13558	1.64187
CG10365-RD	1	1	24	1	CG10365-RD	0.642832	0.733214	0.786864	0.677042	0.609061	1	1	0.468257	0.776355	0.545628	0.741591	0.597026	CG10365	0.714823	18C	1.64187	2.13558	1.64187
CG10366-RA	1	1	24	15	CG10366-RA	0.219885	0.296646	0.31056	0.289483	1	0.0855142	0.576782	1	0.630664	0.601259	0.415087	0.654051	CG10366	0.506661	18C	11.694	2.40913	2.40913
CG10369-RA	1	1	24	3	CG10369-RA	0.546192	0.669879	1	0.449422	0.517498	0.354027	0.820596	0.499044	0.256573	0.625114	0.107889	1	Irk3	0.570519	18C	2.82464	9.2688	2.82464
CG10369-RB	1	1	24	3	CG10369-RB	0.546192	0.669879	1	0.449422	0.517498	0.354027	0.820596	0.499044	0.256573	0.625114	0.107889	1	Irk3	0.570519	18C	2.82464	9.2688	2.82464
CG10370-RA	1	1	24	9	CG10370-RA	0.640724	0.780648	0.701199	0.568826	0.65499	1	0.596338	0.352362	1	0.62045	0.507342	0.372807	Rpt5	0.64964	18C	1.75801	2.83799	1.75801
CG10371-RA	1	1	24	15	CG10371-RA	0.797252	0.608138	0.747628	1	0.884334	0.775136	0.434724	1	0.838579	0.618493	0.768213	0.541618	Plip	0.751176	18C	2.30031	1.84632	1.84632
CG10371-RB	1	1	24	15	CG10371-RB	0.797252	0.608138	0.747628	1	0.884334	0.775136	0.434724	1	0.838579	0.618493	0.768213	0.541618	Plip	0.751176	18C	2.30031	1.84632	1.84632
CG10372-RA	1	1	24	21	CG10372-RA	0.513461	0.787169	0.872925	0.903658	1	0.804295	0.730827	0.945934	0.70686	0.622186	0.724049	1	Faf	0.800947	18C	1.94757	1.60724	1.60724
CG10373-RA	0.421631	1	24	15	CG10373-RA	0.729193	0.863746	0.909594	1	0.684981	0.763502	0.7524	0.81806	0.765085	0.920779	1	0.994522	Jwa	0.850155	18C	1.45989	1.30704	1.30704
CG10374-RA	1	1	24	15	CG10374-RA	0.576946	0.842252	1	0.719176	0.824034	0.778621	0.366699	0.629803	0.840623	0.837206	0.825592	1	Lsd-1	0.770079	18C	2.72703	1.5878	1.5878
CG10374-RB	1	1	24	15	CG10374-RB	0.576946	0.842252	1	0.719176	0.824034	0.778621	0.366699	0.629803	0.840623	0.837206	0.825592	1	Lsd-1	0.770079	18C	2.72703	1.5878	1.5878
CG10374-RC	1	1	24	15	CG10374-RC	0.576946	0.842252	1	0.719176	0.824034	0.778621	0.366699	0.629803	0.840623	0.837206	0.825592	1	Lsd-1	0.770079	18C	2.72703	1.5878	1.5878
CG10375-RA	0.772187	1	24	15	CG10375-RA	0.652673	0.800473	0.58276	1	0.682356	0.568924	0.699892	0.586865	1	0.888146	0.71775	0.758002	CG10375	0.74482	18C	1.75771	1.70397	1.70397
CG10376-RA	1	1	24	9	CG10376-RA	0.963876	0.770967	0.822075	1	0.635297	0.488942	1	0.974704	0.494936	0.529718	0.561926	0.677089	CG10376	0.743294	18C	2.04523	2.02046	2.02046
CG10377-RA	1	1	24	1	CG10377-RA	0.421292	0.269225	0.30621	0.529098	1	0.310438	0.883519	0.869308	0.816014	0.705098	0.738053	1	Hrb27C	0.654021	18C	3.71436	1.41824	1.41824
CG10377-RB	0.576952	1	24	21	CG10377-RB	0.421292	0.269225	0.30621	0.529098	1	0.310438	0.390611	0.597041	0.564517	0.51577	0.727716	1	Hrb27C	0.55266	18C	3.71436	1.93885	1.93885
CG10377-RC	1	1	24	1	CG10377-RC	0.421292	0.269225	0.30621	0.529098	1	0.310438	0.883519	0.869308	0.816014	0.705098	0.738053	1	Hrb27C	0.654021	18C	3.71436	1.41824	1.41824
CG10379-RA	1	1	24	15	CG10379-RA	0.743428	0.521017	1	0.393244	0.804997	0.413032	0.745502	0.54573	0.553669	1	0.495524	0.461916	mbc	0.639838	18C	2.54295	2.1649	2.1649
CG10382-RA	1	1	24	3	CG10382-RA	0.5096	1	0.479831	0.167725	0.386263	0.990928	1	0.698756	0.725344	0.928866	0.971131	0.729699	wrapper	0.715679	18C	5.96214	1.43111	1.43111
CG10383-RA	1	1	24	21	CG10383-RA	0.81536	1	0.639775	0.889332	0.898285	0.958665	0.751625	0.77655	0.84864	0.741123	1	0.519594	CG10383	0.819913	18C	1.56305	1.92458	1.56305
CG10384-RA	0.141715	1	24	19	CG10384-RA	0.0479749	0.470711	0.564655	0.513175	1	0.653017	0.66069	0.376459	1	0.892598	0.900345	0.724186	CG10384	0.650318	18C	20.8442	2.65633	2.65633
CG10385-RA	1	1	24	21	CG10385-RA	0.205706	0.378433	0.322816	0.846303	0.974497	1	0.433671	1	0.391717	0.34085	0.802995	0.595424	msl-1	0.607701	18C	4.8613	2.93384	2.93384
CG10392-RA	0.421631	1	24	3	CG10392-RA	0.94282	0.648242	0.448356	0.869811	0.541387	1	0.585836	1	0.46903	0.452074	0.477896	0.607477	sxc	0.670244	18C	2.23037	2.21203	2.21203
CG10392-RB	0.421631	1	24	3	CG10392-RB	0.94282	0.648242	0.448356	0.869811	0.541387	1	0.585836	1	0.46903	0.452074	0.477896	0.607477	sxc	0.670244	18C	2.23037	2.21203	2.21203
CG10392-RC	0.421631	1	24	3	CG10392-RC	0.94282	0.648242	0.448356	0.869811	0.541387	1	0.585836	1	0.46903	0.452074	0.477896	0.607477	sxc	0.670244	18C	2.23037	2.21203	2.21203
CG10395-RA	1	1	24	13	CG10395-RA	0.281158	1	0.397102	0.370152	0.426221	0.437375	1	0.841056	0.845604	0.943157	0.327292	0.701099	CG10395	0.630851	18C	3.55671	3.05538	3.05538
CG10399-RA	1	1	24	15	CG10399-RA	0.6901	0.684568	0.684825	0.801646	1	0.315745	0.439377	1	0.90198	0.828803	0.762358	0.92809	CG10399	0.753124	18C	3.16712	1.31172	1.31172
CG10406-RA	1	1	24	3	CG10406-RA	0.810622	0.839181	0.841237	0.903679	0.957981	1	0.523396	1	0.694369	0.678761	0.693302	0.845755	mRpS33	0.81569	18C	1.9106	1.47327	1.47327
CG10407-RA	1	1	24	1	CG10407-RA	0.686041	0.938481	0.745344	0.825028	1	0.513085	0.996675	0.766076	0.900255	0.861686	0.851754	1	CG10407	0.840369	18C	1.94899	1.30535	1.30535
CG1041-RA	1	1	24	1	CG1041-RA	0.828539	0.402961	0.739787	0.752269	0.595526	1	1	0.546687	0.384365	0.928106	0.736407	0.626945	CG1041	0.711799	18C	2.48163	2.60169	2.48163
CG1041-RB	1	1	24	1	CG1041-RB	0.828539	0.402961	0.739787	0.752269	0.595526	1	1	0.546687	0.384365	0.928106	0.736407	0.626945	CG1041	0.711799	18C	2.48163	2.60169	2.48163
CG10413-RA	1	1	24	13	CG10413-RA	0.888798	0.73239	0.740985	0.708473	1	0.810134	0.659393	1	0.966449	0.868329	0.467823	0.819929	CG10413	0.805225	18C	1.51655	2.13756	1.51655
CG10414-RA	1	1	24	21	CG10414-RA	0.923516	0.566324	0.62112	0.542781	1	0.513085	0.450877	0.742625	0.509073	0.956807	0.577976	1	Atac2	0.700349	18C	2.2179	1.96436	1.96436
CG10415-RA	1	1	24	3	CG10415-RA	1	0.978242	0.747289	0.607325	0.451174	0.324087	0.625287	0.877646	0.663021	1	0.650534	0.999203	TfIIEalpha	0.743651	18C	3.08559	1.5372	1.5372
CG10417-RA	1	1	24	13	CG10417-RA	0.708027	0.926252	1	0.737939	0.178888	0.550709	0.123173	0.649198	0.5841	0.4066	1	0.741504	CG10417	0.633866	18C	8.11866	2.45942	2.45942
CG10417-RB	1	1	24	13	CG10417-RB	0.708027	0.926252	1	0.737939	0.178888	0.550709	0.123173	0.649198	0.5841	0.4066	1	0.741504	CG10417	0.633866	18C	8.11866	2.45942	2.45942
CG10418-RA	1	1	24	21	CG10418-RA	0.80214	0.569561	0.546586	0.434225	1	0.861983	0.571657	1	0.56977	0.920294	0.934956	0.4372	CG10418	0.720698	18C	2.30295	2.28728	2.28728
CG10419-RA	0.576952	1	24	23	CG10419-RA	0.257133	0.210241	0.0672533	0.211576	0.649665	1	0	0.108058	1	0.116019	0.981167	0.415737	Gem2	0.418071	18C	Inf	9.25432	9.25432
CG10420-RA	1	1	24	3	CG10420-RA	0.293866	0.360413	0.345874	0.181351	0.139214	1	1	0.775091	0.425063	0.665758	0.703785	0.447308	CG10420	0.528143	18C	7.18319	2.35259	2.35259
CG10423-RA	1	1	24	21	CG10423-RA	0.658762	0.692363	0.715491	0.837441	0.639461	1	0.820466	0.987521	0.807924	0.922177	0.982164	1	RpS27	0.838647	18C	1.56382	1.23774	1.23774
CG10424-RA	0.300911	1	24	1	CG10424-RA	0.538754	0.345395	0.365089	0.503752	0.510451	1	1	0.907718	0.551991	0.42966	0.750145	0.619604	CG10424	0.62688	18C	2.89523	2.32742	2.32742
CG10425-RA	1	1	24	1	CG10425-RA	0.879539	0.943874	0.379573	0.506596	1	0.684113	0.73134	0.578192	0.814727	0.597799	1	0.46344	CG10425	0.714933	18C	2.63454	2.15778	2.15778
CG10426-RA	0.772187	1	24	19	CG10426-RA	0.257133	0.315361	0.85748	0.370257	0.487249	1	0.68832	0.544181	0.777164	0.811492	1	0.785122	CG10426	0.657813	18C	3.88904	1.83762	1.83762
CG10428-RA	1	1	24	21	CG10428-RA	0.959497	0.970842	0.941091	0.907925	1	0.932882	0.427053	0.485093	0.49215	1	0.402712	0.783857	CG10428	0.775259	18C	2.34163	2.48317	2.34163
CG10433-RA	0.00851692	1	24	23	CG10433-RA	0.766592	0.582092	0.650535	0.959011	0.760472	1	0.719735	0.672825	0.474403	0.646717	0.874831	1	CG10433	0.758934	18C	1.71794	2.10791	1.71794
CG10433-RB	0.00851692	1	24	23	CG10433-RB	0.766592	0.582092	0.650535	0.959011	0.760472	1	0.719735	0.672825	0.474403	0.646717	0.874831	1	CG10433	0.758934	18C	1.71794	2.10791	1.71794
CG10435-RA	0.209359	1	24	19	CG10435-RA	0.493335	0.756315	1	0.744203	0.856933	0.719475	0.642432	0.574413	0.580282	0.843952	1	0.639729	CG10435	0.737589	18C	2.02702	1.74091	1.74091
CG10436-RA	0.00325557	0.744181	24	1	CG10436-RA	1	0.511022	0.130776	0.411413	0.315822	0.972261	0.613693	0.808636	0.158378	0.165374	0.899074	1	Obp69a	0.582204	18C	7.64669	6.314	6.314
CG1044-RA	0.576952	1	24	9	CG1044-RA	0.422779	1	0.805642	0.496963	0.343345	0.469773	0.591776	0.346558	0.811688	0.330748	0.224768	1	dos	0.570337	18C	2.91253	4.44902	2.91253
CG1044-RB	0.576952	1	24	9	CG1044-RB	0.422779	1	0.805642	0.496963	0.343345	0.469773	0.591776	0.346558	0.811688	0.330748	0.224768	1	dos	0.570337	18C	2.91253	4.44902	2.91253
CG10440-RA	0.113223	1	24	1	CG10440-RA	0.469547	0.726701	0.438609	0.533539	0.720281	1	0.548893	0.632846	0.495793	0.291202	0.850211	1	CG10440	0.642302	18C	2.27994	3.43404	2.27994
CG10443-RA	0.880418	1	24	1	CG10443-RA	0.492838	0.538742	0.487587	0.493677	0.446645	1	0.613693	0.531389	0.475135	0.628421	0.389599	1	Lar	0.591477	18C	2.23892	2.56674	2.23892
CG10443-RB	0.663955	1	24	1	CG10443-RB	0.492838	0.538742	0.487587	0.493677	0.446645	1	0.631227	0.531389	0.459297	0.628421	0.389599	1	Lar	0.591618	18C	2.23892	2.56674	2.23892
CG10444-RA	1	1	24	21	CG10444-RA	0.514265	0.859087	0.542665	0.525291	0.470447	1	0.568839	0.519837	0.828723	0.804756	0.666464	1	CG10444	0.691698	18C	2.12564	1.92368	1.92368
CG10446-RA	0.000383197	0.3972	24	9	CG10446-RA	0.570752	1	0.831707	0.348868	0.185406	0.348807	0.546142	1	0.371582	0.280962	0.193966	0.287653	Side	0.497154	18C	5.39357	5.15555	5.15555
CG10447-RA	1	1	24	21	CG10447-RA	0.729193	0.670741	0.381443	1	0.460591	0.708966	0.553184	0.425195	0.124917	1	0.512144	0.525817	Nf-YB	0.591016	18C	2.62163	8.00531	2.62163
CG10449-RA	1	1	24	13	CG10449-RA	0.75064	0.884092	0.813371	1	0.903119	0.718234	0.607139	1	0.52456	0.830932	0.699331	0.669106	Catsup	0.783377	18C	1.64707	1.90636	1.64707
CG10460-RA	1	1	24	15	CG10460-RA	0.81819	0.862633	0.9048	1	0.77974	0.921098	0.807725	0.640535	1	0.754823	0.734608	0.644266	cer	0.822368	18C	1.28248	1.5612	1.28248
CG10462-RA	1	1	24	21	CG10462-RA	0.380109	0.521031	0.456153	0.588732	0.423695	1	0.652473	0.286578	0.417458	1	0.882868	0.137821	CG10462	0.562243	18C	2.63082	7.25578	2.63082
CG10462-RB	1	1	24	21	CG10462-RB	0.380109	0.521031	0.456153	0.588732	0.423695	1	0.652473	0.286578	0.417458	1	0.882868	0.137821	CG10462	0.562243	18C	2.63082	7.25578	2.63082
CG10462-RC	1	1	24	21	CG10462-RC	0.380109	0.521031	0.456153	0.588732	0.423695	1	0.652473	0.286578	0.417458	1	0.882868	0.137821	CG10462	0.562243	18C	2.63082	7.25578	2.63082
CG10465-RA	0.0363147	1	24	3	CG10465-RA	1	0.981162	0.706188	0.773457	0.909567	0.816699	0.990596	1	0.699937	0.557558	0.710017	0.880842	CG10465	0.835502	18C	1.41605	1.79353	1.41605
CG10467-RA	1	1	24	13	CG10467-RA	0.370833	0.900871	0.570759	0.704149	1	0.360546	0.435448	1	0.634935	0.486968	0.388081	0.733205	CG10467	0.63215	18C	2.77357	2.57678	2.57678
CG10469-RA	1	1	24	3	CG10469-RA	0.461758	0.647228	0.36232	0.379947	1	0.769627	0.355839	0.693117	0.600906	0.32102	0.277655	1	CG10469	0.572451	18C	2.81026	3.60159	2.81026
CG10470-RA	1	1	24	19	CG10470-RA	0.690838	0.856106	0.7077	0.607915	1	0.858251	0.681084	0.700126	0.713365	1	0.664612	0.609128	CG10470	0.757427	18C	1.64497	1.64169	1.64169
CG10473-RA	1	1	24	1	CG10473-RA	0.444399	0.44284	0.305112	0.434225	1	0.378063	0.995355	0.769813	0.625435	1	0.684199	0.575895	Acn	0.637945	18C	3.27749	1.73643	1.73643
CG10473-RB	1	1	24	15	CG10473-RB	0.351816	0.539357	0.897173	0.651338	1	0.855142	0.995355	0.769813	0.625435	1	0.684199	0.548472	Acn	0.743175	18C	2.8424	1.82325	1.82325
CG10479-RA	1	1	24	11	CG10479-RA	0.486129	0.41735	0.495876	1	0.460591	0.85076	0.636517	1	0.464374	0.854323	0.292904	0.52746	CG10479	0.623857	18C	2.39607	3.41409	2.39607
CG10480-RA	0.489949	1	24	23	CG10480-RA	0.571406	0.677442	0.37363	0.391807	0.649665	1	0.326497	0.585564	0.458751	0.675752	0.620051	1	Rcc1	0.61088	18C	3.06282	2.17983	2.17983
CG10480-RB	0.489949	1	24	23	CG10480-RB	0.571406	0.677442	0.37363	0.391807	0.649665	1	0.326497	0.585564	0.458751	0.675752	0.620051	1	Rcc1	0.61088	18C	3.06282	2.17983	2.17983
CG10480-RC	0.489949	1	24	23	CG10480-RC	0.571406	0.677442	0.37363	0.391807	0.649665	1	0.326497	0.585564	0.458751	0.675752	0.620051	1	Rcc1	0.61088	18C	3.06282	2.17983	2.17983
CG10483-RA	1	1	24	15	CG10483-RA	0.580496	0.291253	0.786752	0.955295	1	0.153925	0.670679	0.883724	0.736459	0.607749	0.719259	1	CG10483	0.698799	18C	6.49665	1.64541	1.64541
CG10484-RA	0.421631	1	24	11	CG10484-RA	0.651233	0.960514	0.845781	0.660577	1	0.633169	0.536965	0.734853	1	0.508398	0.543933	0.517627	Rpn3	0.716087	18C	1.86232	1.96696	1.86232
CG10488-RA	1	1	24	13	CG10488-RA	0.308559	0.441505	0.564928	0.507782	0.389799	1	0.433671	1	0.489646	0.766912	0.27796	0.48092	eyg	0.55514	18C	3.24087	3.59764	3.24087
CG10488-RB	1	1	24	13	CG10488-RB	0.308559	0.441505	0.564928	0.507782	0.389799	1	0.433671	1	0.489646	0.766912	0.27796	0.48092	eyg	0.55514	18C	3.24087	3.59764	3.24087
CG1049-RA	1	1	24	3	CG1049-RA	0.81961	0.763765	0.73138	0.714068	0.532928	1	0.776291	0.842374	0.587763	0.753698	1	0.564266	Cct1	0.757179	18C	1.87642	1.77221	1.77221
CG1049-RB	1	1	24	3	CG1049-RB	0.81961	0.763765	0.73138	0.714068	0.532928	1	0.776291	0.842374	0.587763	0.753698	1	0.564266	Cct1	0.757179	18C	1.87642	1.77221	1.77221
CG1049-RC	1	1	24	3	CG1049-RC	0.81961	0.763765	0.73138	0.714068	0.532928	1	0.776291	0.842374	0.587763	0.753698	1	0.564266	Cct1	0.757179	18C	1.87642	1.77221	1.77221
CG1049-RD	1	1	24	3	CG1049-RD	0.81961	0.763765	0.73138	0.714068	0.532928	1	0.776291	0.842374	0.587763	0.753698	1	0.564266	Cct1	0.757179	18C	1.87642	1.77221	1.77221
CG10492-RA	1	1	24	1	CG10492-RA	0.72562	0.889938	0.54348	0.651338	1	0.577221	1	0.397388	0.444461	0.718596	0.935986	0.462691	CG10492	0.69556	18C	1.83999	2.51643	1.83999
CG10495-RA	1	1	24	13	CG10495-RA	0.514265	0.525602	0.269013	0.423151	0	1	0.0757335	0.249477	0.444645	1	0.0647215	0.287948	CG10495	0.404546	18C	Inf	15.4508	15.4508
CG10496-RA	1	1	24	1	CG10496-RA	1	0.0613226	0.156931	0.246848	0.757973	0	1	0.585624	0.802897	0.943157	0.37982	0.422457	TAF1C-like	0.529752	18C	Inf	2.63282	2.63282
CG10497-RA	0.300911	1	24	23	CG10497-RA	0.791585	0.599638	0.450617	0.683266	1	0.739446	0.825307	0.789479	0.623432	1	0.720363	0.982691	Sdc	0.767152	18C	2.21918	1.60402	1.60402
CG10497-RB	0.300911	1	24	23	CG10497-RB	0.791585	0.599638	0.450617	0.683266	1	0.739446	0.825307	0.789479	0.623432	1	0.720363	0.982691	Sdc	0.767152	18C	2.21918	1.60402	1.60402
CG10497-RC	0.300911	1	24	23	CG10497-RC	0.791585	0.599638	0.450617	0.683266	1	0.739446	0.825307	0.789479	0.623432	1	0.720363	0.982691	Sdc	0.767152	18C	2.21918	1.60402	1.60402
CG10497-RD	0.300911	1	24	23	CG10497-RD	0.791585	0.599638	0.450617	0.683266	1	0.739446	0.825307	0.789479	0.623432	1	0.720363	0.982691	Sdc	0.767152	18C	2.21918	1.60402	1.60402
CG10497-RE	0.300911	1	24	23	CG10497-RE	0.791585	0.599638	0.450617	0.683266	1	0.739446	0.825307	0.789479	0.623432	1	0.720363	0.982691	Sdc	0.767152	18C	2.21918	1.60402	1.60402
CG10498-RA	1	1	24	3	CG10498-RA	0.514265	0.458707	0.550254	0.538556	0.354363	1	0.320545	0.747266	0.623614	0.418603	0.252864	1	cdc2c	0.56492	18C	3.11969	3.95469	3.11969
CG10498-RB	1	1	24	3	CG10498-RB	0.514265	0.315361	0.586938	0.500088	0.354363	1	0.320545	0.747266	0.623614	0.418603	0.252864	1	cdc2c	0.552826	18C	3.17097	3.95469	3.17097
CG10501-RA	1	1	24	13	CG10501-RA	0.303831	0.931585	0.238402	1	0.719673	0.295403	0	0.162087	1	0.154692	0.105125	0.259835	amd	0.430886	18C	Inf	9.51249	9.51249
CG10501-RB	1	1	24	13	CG10501-RB	0.303831	0.931585	0.238402	1	0.719673	0.295403	0	0.162087	1	0.154692	0.105125	0.259835	amd	0.430886	18C	Inf	9.51249	9.51249
CG10504-RA	0.248511	1	24	15	CG10504-RA	0.803983	0.768199	0.997619	1	0.779461	0.509001	0.579835	0.960485	0.673381	1	0.906101	0.944828	Ilk	0.826908	18C	1.96463	1.48504	1.48504
CG10506-RA	1	1	24	13	CG10506-RA	0.614861	1	0.681727	0.923862	0.557231	0.83173	0.836543	0.769029	0.773187	1	0.889476	0.678042	Aats-gln	0.796307	18C	1.79459	1.47484	1.47484
CG10508-RF	1	1	24	3	CG10508-RF	0.833751	1	0.846619	0.585146	0.557612	0.882149	0.594635	0.745854	0.661057	0.776539	0.649874	1	CG10508	0.761103	18C	1.79336	1.53876	1.53876
CG10512-RA	1	1	24	3	CG10512-RA	0.942363	0.843708	0.842949	0.558289	1	0.513085	0.516282	0.840725	0.329955	0.574215	0.570246	1	CG10512	0.710985	18C	1.94899	3.03072	1.94899
CG10512-RB	1	1	24	3	CG10512-RB	0.942363	0.843708	0.842949	0.558289	1	0.513085	0.516282	0.840725	0.329955	0.574215	0.570246	1	CG10512	0.710985	18C	1.94899	3.03072	1.94899
CG10512-RC	1	1	24	3	CG10512-RC	0.942363	0.843708	0.842949	0.558289	1	0.513085	0.516282	0.840725	0.329955	0.574215	0.570246	1	CG10512	0.710985	18C	1.94899	3.03072	1.94899
CG10512-RD	1	1	24	3	CG10512-RD	0.942363	0.843708	0.842949	0.558289	1	0.513085	0.516282	0.840725	0.329955	0.574215	0.570246	1	CG10512	0.710985	18C	1.94899	3.03072	1.94899
CG10513-RB	1	1	24	21	CG10513-RB	0.552419	0.423448	0.281747	1	0.994457	0.483386	0.0885412	1	0.388453	0.536838	0.96205	0.48092	CG10513	0.599355	18C	11.2942	2.57432	2.57432
CG10514-RA	0.300911	1	24	1	CG10514-RA	1	0.660398	0.482864	0.632944	0.583056	0.598314	0.680202	0.286807	0.368639	0.667199	0.906824	1	CG10514	0.655604	18C	2.07098	3.48667	2.07098
CG10516-RA	1	1	24	9	CG10516-RA	0.859834	1	0.965478	0.475729	0.814663	0.518886	0.452657	0.623805	0.813981	0.473927	0.780774	1	CG10516	0.731644	18C	2.20918	2.11003	2.11003
CG10521-RA	1	1	24	1	CG10521-RA	0.88231	0.811584	1	0.161331	0.743074	0.57189	0.908134	0.588495	0.537888	0.996924	0.916037	1	NetB	0.759806	18C	6.19844	1.85912	1.85912
CG10523-RB	0.421631	1	24	19	CG10523-RB	0.164914	0.384292	0.47878	0.407086	1	0.352746	0.644433	0.391911	1	0.841571	0.974367	0.96333	park	0.633619	18C	6.06378	2.5516	2.5516
CG10523-RC	0.421631	1	24	19	CG10523-RC	0.164914	0.384292	0.47878	0.407086	1	0.352746	0.644433	0.391911	1	0.841571	0.974367	0.96333	park	0.633619	18C	6.06378	2.5516	2.5516
CG10527-RA	1	1	24	21	CG10527-RA	0.588059	0.576981	0.707515	1	0.445733	0.762329	0.710458	0.892999	0.737346	0.804912	0.722803	1	CG10527	0.745761	18C	2.2435	1.3835	1.3835
CG10528-RA	0.880418	1	24	19	CG10528-RA	0.607661	0.496845	0.635738	1	0.383825	0.78774	0.1988	0.26195	0.538705	1	0.453051	0.671878	fs(2)ltoPP43	0.58635	18C	5.03017	3.81752	3.81752
CG10528-RB	1	1	24	3	CG10528-RB	0.514265	0.901031	0.691749	0.544052	0.556856	1	0.312498	1	0.483886	0.294735	0.572271	0.396051	fs(2)ltoPP43	0.605616	18C	3.20002	3.39288	3.20002
CG10534-RA	1	1	24	15	CG10534-RA	0.552419	0.271006	0.433458	1	0.209359	0	1	0.718721	0.821144	0.685932	0.893441	0.806509	Lcp65Ag2	0.615999	18C	Inf	1.45787	1.45787
CG10535-RA	1	1	24	13	CG10535-RA	1	0.416118	0.92477	0.999147	0.812114	0.347236	0.608214	0.888056	0.816638	0.930229	0.505729	1	Elp1	0.770687	18C	2.87989	1.97734	1.97734
CG10536-RA	0.421631	1	24	13	CG10536-RA	0.487289	0.689581	1	0.647696	0.781321	0.801768	0.758924	1	0.866582	0.837333	0.562913	0.544437	cbx	0.748154	18C	2.05217	1.83676	1.83676
CG10536-RB	0.421631	1	24	13	CG10536-RB	0.487289	0.689581	1	0.647696	0.781321	0.801768	0.758924	1	0.866582	0.837333	0.562913	0.544437	cbx	0.748154	18C	2.05217	1.83676	1.83676
CG10537-RA	0.0155956	1	24	23	CG10537-RA	0.599976	0.604442	0.40352	0.705252	0.839151	1	0.802877	0.577597	0.83357	0.761591	0.863584	1	Rdl	0.749297	18C	2.47819	1.73131	1.73131
CG10537-RB	0.0155956	1	24	23	CG10537-RB	0.599976	0.604442	0.40352	0.705252	0.839151	1	0.807491	0.577597	0.83357	0.761591	0.863584	1	Rdl	0.749681	18C	2.47819	1.73131	1.73131
CG10537-RC	1	1	24	21	CG10537-RC	0.599976	0.604442	0.40352	0.705252	0.839151	1	0.589737	1	0.646208	0.784171	0.520511	0.94346	Rdl	0.719702	18C	2.47819	1.92119	1.92119
CG10538-RA	1	1	24	3	CG10538-RA	0.594742	0.885729	1	0.83892	0.321999	0.660851	0.905069	0.45868	0.628855	0.415867	0.773468	1	CdGAPr	0.707015	18C	3.1056	2.40462	2.40462
CG10539-RA	0.209359	1	24	21	CG10539-RA	0.489776	0.420481	0.595672	0.725402	0.649665	1	0.627197	0.77709	0.710266	0.829929	1	0.972853	S6k	0.733194	18C	2.37823	1.40792	1.40792
CG10540-RA	1	1	24	9	CG10540-RA	0.892114	0.885729	1	0.76901	0.885497	0.991277	1	0.999101	0.913185	0.943157	0.920334	0.849557	cpa	0.920747	18C	1.30037	1.17708	1.17708
CG10542-RA	1	1	24	21	CG10542-RA	0.514265	0.720825	0.288229	0.604502	0.835284	1	0.468058	0.569297	0.894336	0.441452	1	0.570388	Bre1	0.658886	18C	3.46947	2.26525	2.26525
CG10543-RA	1	1	24	1	CG10543-RA	0.283733	0.500228	0.542665	0.452334	0.672067	1	0.92594	0.992144	0.836363	0.86371	1	0.760848	CG10543	0.735836	18C	3.52445	1.31432	1.31432
CG10543-RB	1	1	24	1	CG10543-RB	0.283733	0.500228	0.542665	0.452334	0.672067	1	0.92594	0.992144	0.836363	0.86371	1	0.760848	CG10543	0.735836	18C	3.52445	1.31432	1.31432
CG10543-RC	1	1	24	1	CG10543-RC	0.283733	0.500228	0.542665	0.452334	0.672067	1	0.92594	0.992144	0.836363	0.86371	1	0.760848	CG10543	0.735836	18C	3.52445	1.31432	1.31432
CG10545-RA	1	1	24	1	CG10545-RA	0.63188	0.694067	0.544842	0.662765	1	0.999165	0.831291	1	0.791096	0.703534	0.880093	0.759594	Gbeta13F	0.791527	18C	1.83539	1.4214	1.4214
CG10545-RB	1	1	24	1	CG10545-RB	0.63188	0.694067	0.544842	0.662765	1	0.999165	0.831291	1	0.791096	0.703534	0.880093	0.759594	Gbeta13F	0.791527	18C	1.83539	1.4214	1.4214
CG10545-RC	0.772187	1	24	21	CG10545-RC	0.63188	0.694067	0.544842	0.662765	1	0.999165	0.706661	0.838022	1	0.98863	0.946125	0.925456	Gbeta13F	0.828134	18C	1.83539	1.19329	1.19329
CG10545-RD	0.772187	1	24	21	CG10545-RD	0.63188	0.694067	0.544842	0.662765	1	0.999165	0.706661	0.838022	1	0.98863	0.946125	0.925456	Gbeta13F	0.828134	18C	1.83539	1.19329	1.19329
CG10545-RE	0.772187	1	24	21	CG10545-RE	0.63188	0.694067	0.544842	0.662765	1	0.999165	0.706661	0.838022	1	0.98863	0.946125	0.925456	Gbeta13F	0.828134	18C	1.83539	1.19329	1.19329
CG10545-RF	0.772187	1	24	21	CG10545-RF	0.63188	0.694067	0.544842	0.662765	1	0.999165	0.706661	0.838022	1	0.98863	0.946125	0.925456	Gbeta13F	0.828134	18C	1.83539	1.19329	1.19329
CG10546-RA	1	1	24	1	CG10546-RA	0.696595	0.660173	0.546586	0.798974	1	0.328374	0.781299	0.856203	0.740651	0.401275	0.614808	1	Cralbp	0.702078	18C	3.0453	2.49206	2.49206
CG10550-RA	1	1	24	13	CG10550-RA	0.892865	1	0.870872	0.897934	0.892957	0.916326	0.748425	0.893713	0.626728	1	0.750643	0.849728	CG10550	0.861683	18C	1.33614	1.59559	1.33614
CG10550-RB	1	1	24	13	CG10550-RB	0.892865	1	0.870872	0.897934	0.892957	0.916326	0.748425	0.893713	0.626728	1	0.750643	0.849728	CG10550	0.861683	18C	1.33614	1.59559	1.33614
CG10550-RC	1	1	24	13	CG10550-RC	0.892865	1	0.870872	0.897934	0.892957	0.916326	0.748425	0.893713	0.626728	1	0.750643	0.849728	CG10550	0.861683	18C	1.33614	1.59559	1.33614
CG10553-RA	0.141715	1	24	21	CG10553-RA	0.700276	0.563624	0.695428	0.78328	0.93303	1	0.661322	0.722935	1	0.762337	0.971243	0.92506	CG10553	0.809878	18C	1.77423	1.38325	1.38325
CG10555-RA	1	1	24	15	CG10555-RA	0.659654	0.755099	0.862667	0.361854	1	0.171028	0.746471	0.345586	0.400909	0.685011	1	0.485813	CG10555	0.622841	18C	5.84698	2.89363	2.89363
CG10559-RB	1	1	24	13	CG10559-RB	0.791585	0.647228	0.41408	0.434225	1	0.513085	0.252975	1	0.685505	0.715784	0.216191	0.641226	CG10559	0.609324	18C	3.95296	4.62554	3.95296
CG1056-RA	0.353312	1	24	15	CG1056-RA	0.682286	0.627594	0.869957	1	0.323221	0.91212	0.428392	0.776149	0.948024	1	0.54	0.597225	5-HT2A	0.725414	18C	3.09385	1.85185	1.85185
CG1056-RB	0.353312	1	24	15	CG1056-RB	0.682286	0.627594	0.869957	1	0.323221	0.91212	0.428392	0.776149	0.948024	1	0.54	0.597225	5-HT2A	0.725414	18C	3.09385	1.85185	1.85185
CG1056-RC	0.353312	1	24	15	CG1056-RC	0.682286	0.627594	0.869957	1	0.323221	0.91212	0.428392	0.776149	0.948024	1	0.54	0.597225	5-HT2A	0.725414	18C	3.09385	1.85185	1.85185
CG1056-RD	0.141715	1	24	15	CG1056-RD	0.212408	0.781525	1	0.34955	0.804997	0.413032	0.428392	0.776149	0.948024	1	0.54	0.597225	5-HT2A	0.654275	18C	4.70792	1.85185	1.85185
CG10560-RA	1	1	24	3	CG10560-RA	0.885248	1	0.648914	0.948844	0.728381	0.99659	0.733338	0.996865	0.876204	0.625989	0.844865	1	CG10560	0.857103	18C	1.54104	1.59747	1.54104
CG10561-RA	1	1	24	21	CG10561-RA	0.771894	0.93662	0.760308	1	0.591299	0.862256	1	0.480162	0.56645	0.935164	0.789415	0.880716	CG10561	0.797857	18C	1.69119	2.08263	1.69119
CG10562-RA	0.113223	1	24	5	CG10562-RA	1	0.770464	0.704176	0.443061	0.825996	0.897472	1	0.743837	0.990671	0.699761	0.57892	0.654128	CG10562	0.775707	18C	2.25703	1.72736	1.72736
CG10563-RA	0.209359	1	24	17	CG10563-RA	0.56715	0.99369	0.699312	1	0.767651	0.472644	0.260032	0.456843	0.548044	0.776628	1	0.823893	l(2)37Cd	0.697157	18C	3.84568	2.18893	2.18893
CG10565-RA	1	1	24	13	CG10565-RA	0.753506	0.964071	1	0.788401	0.846129	0.868272	0.7344	0.858015	0.663353	0.983569	1	0.682556	CG10565	0.845189	18C	1.36166	1.50749	1.36166
CG10566-RA	1	1	24	21	CG10566-RA	0.587732	0.510584	0.518811	0.624652	0.371237	1	0.413304	0.717871	0.475135	0.673308	0.577976	1	CG10566	0.622551	18C	2.6937	2.10467	2.10467
CG1057-RA	1	1	24	13	CG1057-RA	0.574516	0.650415	0.433458	1	0.167487	0.515612	0.522453	0.524505	1	0.492755	0.882341	0.693673	MED31	0.621435	18C	5.9706	2.02941	2.02941
CG1057-RB	1	1	24	13	CG1057-RB	0.574516	0.650415	0.433458	1	0.167487	0.515612	0.522453	0.524505	1	0.492755	0.882341	0.693673	MED31	0.621435	18C	5.9706	2.02941	2.02941
CG10570-RA	1	1	24	9	CG10570-RA	1	0.958633	0.961145	0.970118	0.715705	0.728968	1	0.828365	0.865709	0.923913	0.882712	0.964185	CG10570	0.899955	18C	1.39722	1.2072	1.2072
CG10572-RA	1	1	24	15	CG10572-RA	0.362382	1	0.995205	0.745444	0.343345	0.70466	0.222885	0.293685	0.201322	0.262769	1	0.423717	Cdk8	0.546284	18C	4.48663	4.96716	4.48663
CG10573-RA	1	1	24	9	CG10573-RA	1	0.421593	0.392327	0.46284	0	0.364598	0.55134	0.950007	0.229847	1	0.507417	0.215001	ko	0.507914	18C	Inf	4.65114	4.65114
CG10574-RA	1	1	24	15	CG10574-RA	0.742722	0.719142	0.644125	0.643296	1	0.760126	0.875143	0.687447	0.88169	1	0.934867	0.501242	I-2	0.782483	18C	1.55449	1.99504	1.55449
CG10574-RB	1	1	24	15	CG10574-RB	0.742722	0.719142	0.644125	0.643296	1	0.760126	0.875143	0.687447	0.88169	1	0.934867	0.501242	I-2	0.782483	18C	1.55449	1.99504	1.55449
CG10575-RA	1	1	24	1	CG10575-RA	0.607682	0.951229	0.715229	0.421067	1	0.87069	0.483845	0.723987	1	0.549157	0.833992	0.85226	Ppat-Dpck	0.750761	18C	2.37492	1.82097	1.82097
CG10576-RA	1	1	24	21	CG10576-RA	0.98483	0.783816	0.920724	1	0.65515	0.651923	0.728026	0.546633	0.573101	0.993523	0.938466	1	CG10576	0.814683	18C	1.53392	1.82938	1.53392
CG10578-RA	1	1	24	21	CG10578-RA	0.893071	0.654696	0.726233	0.905192	1	0.860404	0.602898	0.867461	0.70106	1	0.50339	0.562094	DnaJ-1	0.773041	18C	1.65865	1.98653	1.65865
CG10578-RB	1	1	24	21	CG10578-RB	0.893071	0.654696	0.726233	0.905192	1	0.860404	0.602898	0.867461	0.70106	1	0.50339	0.562094	DnaJ-1	0.773041	18C	1.65865	1.98653	1.65865
CG10579-RA	1	1	24	9	CG10579-RA	0.316634	0.194168	0.124224	0.0434225	1	0.102617	0.499982	0.752918	1	0.168415	0.366242	0.54314	Eip63E	0.42598	18C	23.0295	5.93772	5.93772
CG10579-RB	1	1	24	9	CG10579-RB	0.316634	0.194168	0.124224	0.0434225	1	0.102617	0.499982	0.752918	1	0.168415	0.366242	0.54314	Eip63E	0.42598	18C	23.0295	5.93772	5.93772
CG10579-RC	1	1	24	9	CG10579-RC	0.316634	0.194168	0.124224	0.0434225	1	0.102617	0.499982	0.752918	1	0.168415	0.366242	0.54314	Eip63E	0.42598	18C	23.0295	5.93772	5.93772
CG10579-RG	1	1	24	9	CG10579-RG	0.316634	0.194168	0.124224	0.0434225	1	0.102617	0.499982	0.752918	1	0.168415	0.366242	0.54314	Eip63E	0.42598	18C	23.0295	5.93772	5.93772
CG10579-RH	1	1	24	9	CG10579-RH	0.316634	0.194168	0.124224	0.0434225	1	0.102617	0.499982	0.752918	1	0.168415	0.366242	0.54314	Eip63E	0.42598	18C	23.0295	5.93772	5.93772
CG10579-RI	1	1	24	9	CG10579-RI	0.316634	0.194168	0.124224	0.0434225	1	0.102617	0.499982	0.752918	1	0.168415	0.366242	0.54314	Eip63E	0.42598	18C	23.0295	5.93772	5.93772
CG10579-RJ	0.880418	1	24	23	CG10579-RJ	0.316634	0.194168	0.124224	0.0434225	1	0.102617	0.585072	0.536294	0.275724	0.431855	1	0.612547	Eip63E	0.435213	18C	23.0295	3.62681	3.62681
CG10579-RK	1	1	24	9	CG10579-RK	0.316634	0.194168	0.124224	0.0434225	1	0.102617	0.499982	0.752918	1	0.168415	0.366242	0.54314	Eip63E	0.42598	18C	23.0295	5.93772	5.93772
CG10580-RA	1	1	24	13	CG10580-RA	0.81536	1	0.947814	0.919381	0.858361	0.939546	1	0.812043	0.913762	0.921223	0.904281	0.89895	fng	0.910893	18C	1.22645	1.23146	1.22645
CG10581-RA	0.248511	1	24	13	CG10581-RA	0.651066	0.851735	0.510861	1	0.411242	0.422004	0.220889	0.523901	0.678369	1	0.490805	0.475913	CG10581	0.603065	18C	4.52715	2.10122	2.10122
CG10582-RA	0.421631	1	24	7	CG10582-RA	1	0.778963	0.721033	0.555964	0.358501	0.68321	0.858959	0.226362	1	0.594097	0.440437	0.798322	Sin	0.667987	18C	2.7894	4.4177	2.7894
CG10584-RA	1	1	24	15	CG10584-RA	0.374011	0.430038	0.60528	0.846303	0.841611	1	1	0.819083	0.891053	0.560796	0.843047	0.46242	CG10584	0.722803	18C	2.67372	2.16254	2.16254
CG10585-RA	1	1	24	1	CG10585-RA	1	0.268287	0.318765	0.30856	0.296083	0.121533	0.608684	0.802035	0.570162	0.722921	0.732103	1	CG10585	0.562428	18C	8.22824	1.75389	1.75389
CG1059-RA	1	1	24	17	CG1059-RA	0.84591	0.728131	0.968217	0.817365	1	0.82999	0.877792	1	0.633197	0.931382	0.963743	0.807327	Karybeta3	0.866921	18C	1.37338	1.57929	1.37338
CG10590-RA	0.772187	1	24	3	CG10590-RA	1	0.772211	0.813715	0.609501	0.421096	0.864232	0.400587	0.67179	0.603056	0.560999	0.622436	1	CG10590	0.694968	18C	2.49634	1.78253	1.78253
CG10593-RA	0.353312	1	24	1	CG10593-RA	0.723026	0.649456	0.711154	0.641011	0.559612	1	0.829646	0.821802	0.613133	0.957588	0.775947	1	Acer	0.773531	18C	1.78695	1.63097	1.63097
CG10596-RA	1	1	24	3	CG10596-RA	0.824383	0.820416	0.812542	0.83348	0.750068	1	0.903714	1	0.850452	0.951694	0.840087	0.866996	Msr-110	0.871153	18C	1.33321	1.19035	1.19035
CG10596-RB	1	1	24	3	CG10596-RB	0.824383	0.820416	0.812542	0.83348	0.750068	1	0.903714	1	0.850452	0.951694	0.840087	0.866996	Msr-110	0.871153	18C	1.33321	1.19035	1.19035
CG10596-RC	1	1	24	3	CG10596-RC	0.824383	0.820416	0.812542	0.83348	0.750068	1	0.903714	1	0.850452	0.951694	0.840087	0.866996	Msr-110	0.871153	18C	1.33321	1.19035	1.19035
CG10600-RA	0.300911	1	24	3	CG10600-RA	1	0.809459	0.596337	0.658262	0.530581	0.93337	0.756158	0.649797	0.80179	0.589145	0.393345	1	CG10600	0.72652	18C	1.88473	2.5423	1.88473
CG10600-RB	0.300911	1	24	3	CG10600-RB	1	0.809459	0.596337	0.658262	0.530581	0.93337	0.756158	0.649797	0.80179	0.589145	0.393345	1	CG10600	0.72652	18C	1.88473	2.5423	1.88473
CG10602-RA	1	1	24	21	CG10602-RA	0.640189	0.753331	0.644879	0.654897	1	0.8243	0.786787	0.959099	0.79048	1	0.729915	0.917166	CG10602	0.80842	18C	1.56204	1.37002	1.37002
CG10602-RC	1	1	24	21	CG10602-RC	0.640189	0.753331	0.644879	0.654897	1	0.8243	0.786787	0.959099	0.79048	1	0.729915	0.917166	CG10602	0.80842	18C	1.56204	1.37002	1.37002
CG10602-RD	1	1	24	21	CG10602-RD	0.640189	0.753331	0.644879	0.654897	1	0.8243	0.786787	0.959099	0.79048	1	0.729915	0.917166	CG10602	0.80842	18C	1.56204	1.37002	1.37002
CG10603-RA	1	1	24	21	CG10603-RA	0.472018	0.791174	1	0.776778	0.864627	0.856659	0.93298	0.561986	0.587498	0.874918	0.815545	1	mRpL13	0.794515	18C	2.11856	1.7794	1.7794
CG10604-RB	1	1	24	1	CG10604-RB	0	0.551882	0.20176	0.317363	0.730873	1	1	0.24706	0.338722	0.176842	0.373886	0.158422	bsh	0.424734	18C	Inf	6.31227	6.31227
CG10610-RA	0.0155956	1	24	23	CG10610-RA	0.514265	0.48881	0.40352	0.973248	0.974497	1	0.971119	0.79975	0.315234	0.772805	0.70024	1	ECSIT	0.742791	18C	2.47819	3.17225	2.47819
CG10616-RA	1	1	24	17	CG10616-RA	0.446535	0.448081	0.987422	0.734843	1	0.473617	1	0.405432	0.243185	0.399028	0.460167	0.365588	CG10616	0.580325	18C	2.23946	4.1121	2.23946
CG10617-RA	1	1	24	21	CG10617-RA	0.263862	0.323614	0.483093	0.796079	1	0.171028	0.394517	0.259919	0.178176	0.372091	0.337153	1	Syt12	0.464961	18C	5.84698	5.61244	5.61244
CG10618-RE	0.421631	1	24	1	CG10618-RE	0.630862	1	0.588406	0.607238	0.586443	0.856393	0.739153	0.513862	0.626686	0.573106	0.720809	1	CHKov1	0.70358	18C	1.7052	1.94605	1.7052
CG10620-RA	0.421631	1	24	17	CG10620-RA	0.395589	0.849049	0.90016	0.846303	0.899536	1	0.547236	0.428134	0.432509	1	0.818414	0.693551	Tsf2	0.734207	18C	2.52788	2.33572	2.33572
CG10621-RA	0.772187	1	24	7	CG10621-RA	1	0.839702	0.771279	0.696598	0.807499	0.585566	0.65374	1	0.62417	0.47719	0.68726	0.769471	CG10621	0.742706	18C	1.70775	2.0956	1.70775
CG10622-RA	1	1	24	13	CG10622-RA	0.0642832	0.867243	0.90792	0.528939	0.487249	1	0.508046	0.814957	0.558657	1	0.622945	0.727868	Sucb	0.674009	18C	15.5562	1.79001	1.79001
CG10623-RA	0.300911	1	24	9	CG10623-RA	0.780908	1	0.522633	0.718146	0.435226	0.535938	0.989794	0.879132	1	0.656929	0.77695	0.799123	CG10623	0.757898	18C	2.29766	1.52223	1.52223
CG10624-RA	1	1	24	3	CG10624-RA	1	0.850604	0.632785	0.84937	0.794649	0.940898	0.908802	0.784069	0.68407	1	0.49928	0.644454	sinu	0.799082	18C	1.58032	2.00288	1.58032
CG10624-RB	1	1	24	3	CG10624-RB	1	0.836218	0.641989	0.797893	0.746488	0.883873	0.908802	0.784069	0.68407	1	0.49928	0.644454	sinu	0.785595	18C	1.55766	2.00288	1.55766
CG10627-RA	0.772187	1	24	7	CG10627-RA	0.767397	1	0.752676	0.552506	0.545312	0.74611	0.894816	0.906968	0.393763	0.757393	1	0.872358	nst	0.765775	18C	1.83381	2.5396	1.83381
CG10628-RA	1	1	24	13	CG10628-RA	0.390639	0.425867	0.851435	1	0.657987	0.506404	0.972372	1	0.985413	0.581575	0.547234	0.661264	CG10628	0.715016	18C	2.55991	1.82737	1.82737
CG1063-RA	1	1	24	3	CG1063-RA	0.514265	0.350401	0.448356	0.470168	0.378971	1	0.455354	1	0.47006	0.368118	0.426205	0.687028	Itp-r83A	0.547411	18C	2.85387	2.71652	2.71652
CG1063-RB	1	1	24	3	CG1063-RB	0.514265	0.350401	0.448356	0.470168	0.378971	1	0.455354	1	0.47006	0.368118	0.426205	0.687028	Itp-r83A	0.547411	18C	2.85387	2.71652	2.71652
CG10631-RA	0.113223	1	24	1	CG10631-RA	0.734665	0.563145	0.374697	0.664952	0.904891	1	0.447119	0.363886	0.237567	0.272867	0.269722	1	CG10631	0.569459	18C	2.66882	4.20933	2.66882
CG10632-RC	1	1	24	21	CG10632-RC	0.32726	0.372699	0.623622	0.192342	0.442953	1	0.454401	0.598744	0.923494	1	0.517772	0.671878	sowah	0.593764	18C	5.19909	1.93135	1.93135
CG10632-RE	1	1	24	21	CG10632-RE	0.32726	0.372699	0.623622	0.192342	0.442953	1	0.454401	0.598744	0.923494	1	0.517772	0.671878	sowah	0.593764	18C	5.19909	1.93135	1.93135
CG10632-RF	1	1	24	21	CG10632-RF	0.32726	0.372699	0.623622	0.192342	0.442953	1	0.454401	0.598744	0.923494	1	0.517772	0.671878	sowah	0.593764	18C	5.19909	1.93135	1.93135
CG10635-RA	1	1	24	15	CG10635-RA	1	0.870118	0.901291	0.789469	0.973073	0.709488	0.867493	0.666783	0.792277	1	0.720762	0.677986	CG10635	0.830728	18C	1.40947	1.49974	1.40947
CG10637-RA	0.772187	1	24	3	CG10637-RA	1	0.507498	0.622311	0.624214	0.392055	0.80463	0.73972	0.974695	0.91315	0.627904	0.737521	1	Nak	0.745308	18C	2.55066	1.5926	1.5926
CG10637-RB	0.772187	1	24	3	CG10637-RB	1	0.507498	0.622311	0.624214	0.392055	0.80463	0.73972	0.974695	0.91315	0.627904	0.737521	1	Nak	0.745308	18C	2.55066	1.5926	1.5926
CG10637-RC	1	1	24	1	CG10637-RC	1	0.846836	0.67256	0.548551	0.902348	0.648174	0.894816	0.302323	0.393763	0.714113	1	0.20355	Nak	0.677253	18C	1.82298	4.9128	1.82298
CG10638-RA	1	1	24	21	CG10638-RA	0.974113	0.938696	0.888092	1	0.949309	0.938072	0.766383	0.910337	0.60358	0.776229	0.89047	1	CG10638	0.886273	18C	1.30483	1.65678	1.30483
CG10639-RA	1	1	24	3	CG10639-RA	0.938614	0.844892	1	0.878599	0.58743	0.853972	0.991803	0.711509	0.78437	0.908402	0.62345	1	CG10639	0.843587	18C	1.70233	1.60398	1.60398
CG1064-RA	0.170207	1	24	7	CG1064-RA	0.98884	1	0.762285	0.699449	0.887582	0.674674	0.534697	1	0.965939	0.528704	0.538021	0.710449	Snr1	0.77422	18C	1.87022	1.89142	1.87022
CG10640-RA	0.248511	1	24	3	CG10640-RA	1	0.870781	0.816039	0.707631	0.871668	0.85559	1	0.730165	0.885999	0.853046	0.74573	0.920257	Uev1A	0.854742	18C	1.41317	1.36955	1.36955
CG10640-RB	0.880418	1	24	3	CG10640-RB	1	0.870781	0.816039	0.707631	0.871668	0.85559	1	0.848959	0.933569	0.974806	0.808711	0.927138	Uev1A	0.884574	18C	1.41317	1.23654	1.23654
CG10641-RA	1	1	24	9	CG10641-RA	1	0.490581	0.650141	0.587733	0.649691	0.555578	0.755313	0.640772	1	0.741654	0.486326	0.708112	Swip-1	0.688825	18C	2.0384	2.05623	2.0384
CG10642-RA	1	1	24	3	CG10642-RA	0.905027	0.887979	0.83187	1	0.48999	0.804501	0.413304	0.511586	0.294131	0.425247	0.577976	1	Klp64D	0.678468	18C	2.41953	3.39985	2.41953
CG10645-RA	0.576952	1	24	15	CG10645-RA	0.451851	0.678385	0.978058	1	0.797176	0.666549	0.880533	0.766707	1	0.777058	0.660087	0.926706	lama	0.798592	18C	2.21312	1.51495	1.51495
CG10645-RB	0.576952	1	24	15	CG10645-RB	0.451851	0.678385	0.978058	1	0.797176	0.666549	0.880533	0.766707	1	0.777058	0.660087	0.926706	lama	0.798592	18C	2.21312	1.51495	1.51495
CG10645-RC	0.576952	1	24	15	CG10645-RC	0.451851	0.659275	0.978058	1	0.797176	0.666549	0.880533	0.766707	1	0.777058	0.660087	0.926706	lama	0.797	18C	2.21312	1.51495	1.51495
CG10646-RA	1	1	24	13	CG10646-RA	0.764669	0.468915	1	0.891353	0.603748	0.247819	0.424998	1	0.383883	0.62989	0.233486	0.923366	CG10646	0.631011	18C	4.0352	4.28291	4.0352
CG10648-RA	1	1	24	3	CG10648-RA	0.571406	0.840963	0.717369	0.470168	0.649665	1	0.401783	1	0.443562	0.210525	0.495968	0.396051	Rbm13	0.599788	18C	2.4889	4.75003	2.4889
CG1065-RA	1	1	24	1	CG1065-RA	0.981743	0.931068	0.80734	0.788398	1	0.859919	0.819978	0.980274	0.825263	1	0.933366	0.952329	Scsalpha	0.90664	18C	1.2684	1.21174	1.21174
CG10652-RA	0.772187	1	24	17	CG10652-RA	0.78207	0.84648	0.872965	1	0.802884	0.829096	0.724762	0.915271	0.775084	0.882364	0.917553	1	RpL30	0.862378	18C	1.37976	1.29018	1.29018
CG10652-RB	0.772187	1	24	17	CG10652-RB	0.78207	0.84648	0.872965	1	0.802884	0.829096	0.725096	0.915935	0.775869	0.883069	0.917458	1	RpL30	0.862577	18C	1.37913	1.28888	1.28888
CG10653-RA	1	1	24	15	CG10653-RA	0.747891	0.788264	0.990284	1	0.885751	0.499912	1	0.448003	0.76777	0.48101	0.828958	0.735076	hk	0.76441	18C	2.00035	2.23213	2.00035
CG10654-RA	1	1	24	21	CG10654-RA	0.257133	0.533688	0.51216	0.309226	0.487249	1	0.644796	0.400763	1	0.67699	0.467864	0.909709	CG10654	0.599965	18C	3.88904	2.49524	2.49524
CG10655-RA	1	1	24	9	CG10655-RA	0.557042	0.818024	0.93168	0.844327	1	0.855142	0.966369	0.964278	1	0.672517	0.713603	0.951262	l(2)37Bb	0.856187	18C	1.7952	1.48695	1.48695
CG10657-RA	0.248511	1	24	15	CG10657-RA	0.840503	0.696512	0.84666	1	0.645688	0.530068	0.549769	0.827893	0.646347	1	0.831525	0.685702	CG10657	0.758389	18C	1.88655	1.54716	1.54716
CG10658-RA	0.576952	1	24	19	CG10658-RA	0.629758	0.63009	0.702201	1	0.837437	0.902321	0.433782	0.783452	0.753235	0.687752	0.827702	1	Hf	0.765644	18C	2.30531	1.45401	1.45401
CG1066-RC	1	1	24	9	CG1066-RC	0.849632	0.45589	1	0.786488	0.603748	0.826064	0.659934	1	0.566287	0.404574	0.789567	0.418191	Shab	0.696698	18C	2.19351	2.47174	2.19351
CG1066-RD	0.576952	1	24	9	CG1066-RD	0.849632	0.45589	1	0.786488	0.603748	0.826064	0.558032	1	0.866962	0.842099	0.495968	0.565788	Shab	0.737556	18C	2.19351	2.01626	2.01626
CG10660-RA	0.209359	1	24	5	CG10660-RA	0.858273	1	0.976498	0.600279	0.650548	0.417233	1	0.917355	0.560249	0.501425	0.778872	0.850262	CG10660	0.759249	18C	2.39674	1.99432	1.99432
CG10664-RA	0.421631	1	24	21	CG10664-RA	0.809748	0.888941	0.892816	1	0.897656	0.941114	0.755885	0.864298	0.741834	0.84947	1	0.898928	CoIV	0.878391	18C	1.32295	1.34801	1.32295
CG10664-RB	0.421631	1	24	21	CG10664-RB	0.809748	0.888941	0.892816	1	0.897656	0.941114	0.755554	0.864442	0.742866	0.84982	1	0.899503	CoIV	0.878538	18C	1.32353	1.34614	1.32353
CG10667-RA	1	1	24	13	CG10667-RA	0.171422	0.788403	0.470773	0.775777	0.324832	1	0.0562166	1	0.203113	0.106042	0	0.320613	Orc1	0.434766	18C	17.7883	Inf	17.7883
CG10671-RA	1	1	24	21	CG10671-RA	0.794171	0.944498	0.547616	1	0.934862	0.701947	0.903474	0.888882	0.788869	0.925968	0.900789	1	CG10671	0.860923	18C	1.8261	1.26764	1.26764
CG10671-RB	1	1	24	21	CG10671-RB	0.794171	0.944498	0.547616	1	0.934862	0.701947	0.903474	0.888882	0.788869	0.925968	0.900789	1	CG10671	0.860923	18C	1.8261	1.26764	1.26764
CG10672-RA	0.489949	1	24	1	CG10672-RA	0.892104	0.843708	0.630979	0.811587	1	0.610815	0.852635	0.855536	0.712147	0.804169	1	0.913316	CG10672	0.82725	18C	1.63716	1.4042	1.4042
CG10673-RA	1	1	24	13	CG10673-RA	0.520852	0.897363	0.797916	1	0.516989	0.530519	0.674599	1	0.489646	0.613529	0.617689	0.656493	Prpk	0.692966	18C	1.93428	2.04229	1.93428
CG10674-RA	1	1	24	3	CG10674-RA	0.783336	0.985449	0.732153	1	0.622125	0.784007	0.732337	0.877809	0.73404	0.708533	0.932722	1	CG10674	0.824376	18C	1.60739	1.41137	1.41137
CG10675-RA	0.248511	1	24	15	CG10675-RA	0.637224	0.669879	1	0.786488	0.689998	0.973575	0.304854	0.380551	1	0.756646	0.548478	0.467704	CHKov2	0.684616	18C	3.28026	2.62777	2.62777
CG10679-RA	1	1	24	21	CG10679-RA	0.468597	1	0.794203	0.832841	0.852442	0.765406	0.604926	0.582218	0.755464	0.61023	0.746231	1	Nedd8	0.751047	18C	2.13403	1.71757	1.71757
CG10680-RA	0.880418	1	24	1	CG10680-RA	0.617118	0.702805	0.726336	0.670997	0.723912	1	0.973702	0.998198	0.714598	0.845123	0.975591	1	CG10680	0.829032	18C	1.62043	1.39939	1.39939
CG10681-RA	1	1	24	13	CG10681-RA	0.643406	0.745268	0.729229	1	0.677339	0.139013	0.306847	0.635357	0.296959	0.82687	0.412075	1	CG10681	0.617697	18C	7.19357	3.36747	3.36747
CG10682-RA	1	1	24	1	CG10682-RA	1	0.737529	0.710429	0.500368	0.665787	0.840874	0.652473	0.620919	0.572981	1	0.758957	0.65465	vih	0.726247	18C	1.99853	1.74526	1.74526
CG10685-RA	0.663955	1	24	21	CG10685-RA	0.197794	0.388137	0.74496	0.618452	0.899536	1	0.86418	0.5941	0.644826	0.850495	0.513756	1	l(2)37Cg	0.69302	18C	5.05576	1.94645	1.94645
CG10686-RA	0.421631	1	24	21	CG10686-RA	0.811998	0.763506	0.775183	0.846303	0.820629	1	0.592903	0.746674	1	0.791789	0.874381	0.824577	tral	0.820662	18C	1.68662	1.33927	1.33927
CG10687-RA	1	1	24	3	CG10687-RA	0.81536	1	0.727415	0.946612	0.910098	0.933916	0.627801	1	0.699861	0.562134	0.594242	0.694941	Aats-asn	0.792698	18C	1.59286	1.77893	1.59286
CG10688-RA	1	1	24	21	CG10688-RA	0.630974	0.597982	0.729141	0.641898	1	0.624625	0.59178	1	0.501887	0.877688	0.76439	0.881686	CG10688	0.736838	18C	1.68982	1.99248	1.68982
CG10689-RA	1	1	24	9	CG10689-RA	1	0.766533	0.784653	0.30856	0.710599	0	0.379462	1	0.479853	0.572628	0.908003	0.0961839	l(2)37Cb	0.583873	18C	Inf	10.3967	10.3967
CG10691-RA	1	1	24	13	CG10691-RA	0.860853	0.919164	0.997314	1	0.854012	0.768047	0.635633	1	0.715202	0.953518	0.889739	0.968784	l(2)37Cc	0.880189	18C	1.57323	1.39821	1.39821
CG10691-RB	1	1	24	13	CG10691-RB	0.860853	0.919164	0.997314	1	0.854012	0.768047	0.635633	1	0.715202	0.953518	0.889739	0.968784	l(2)37Cc	0.880189	18C	1.57323	1.39821	1.39821
CG10693-RB	1	1	24	1	CG10693-RB	0.263862	0.283162	0.10352	0.434225	1	0.128271	0.900111	0.711621	0.650426	0.339578	1	0.45631	slo	0.522591	18C	9.65997	2.94483	2.94483
CG10693-RC	1	1	24	1	CG10693-RC	0.263862	0.283162	0.10352	0.434225	1	0.128271	0.900111	0.711621	0.650426	0.339578	1	0.45631	slo	0.522591	18C	9.65997	2.94483	2.94483
CG10693-RD	1	1	24	1	CG10693-RD	0.263862	0.283162	0.10352	0.434225	1	0.128271	0.900111	0.711621	0.650426	0.339578	1	0.45631	slo	0.522591	18C	9.65997	2.94483	2.94483
CG10693-RE	1	1	24	1	CG10693-RE	0.263862	0.283162	0.10352	0.434225	1	0.128271	0.900111	0.711621	0.650426	0.339578	1	0.45631	slo	0.522591	18C	9.65997	2.94483	2.94483
CG10693-RF	1	1	24	1	CG10693-RF	0.263862	0.283162	0.10352	0.434225	1	0.128271	0.900111	0.711621	0.650426	0.339578	1	0.45631	slo	0.522591	18C	9.65997	2.94483	2.94483
CG10693-RG	1	1	24	1	CG10693-RG	0.263862	0.283162	0.10352	0.434225	1	0.128271	0.900111	0.711621	0.650426	0.339578	1	0.45631	slo	0.522591	18C	9.65997	2.94483	2.94483
CG10693-RH	1	1	24	1	CG10693-RH	0.263862	0.283162	0.10352	0.434225	1	0.128271	0.900111	0.711621	0.650426	0.339578	1	0.45631	slo	0.522591	18C	9.65997	2.94483	2.94483
CG10693-RI	1	1	24	1	CG10693-RI	0.263862	0.283162	0.10352	0.434225	1	0.128271	0.900111	0.711621	0.650426	0.339578	1	0.45631	slo	0.522591	18C	9.65997	2.94483	2.94483
CG10693-RJ	1	1	24	1	CG10693-RJ	0.263862	0.283162	0.10352	0.434225	1	0.128271	0.900111	0.711621	0.650426	0.339578	1	0.45631	slo	0.522591	18C	9.65997	2.94483	2.94483
CG10693-RK	1	1	24	1	CG10693-RK	0.263862	0.283162	0.10352	0.434225	1	0.128271	0.900111	0.711621	0.650426	0.339578	1	0.45631	slo	0.522591	18C	9.65997	2.94483	2.94483
CG10693-RL	1	1	24	1	CG10693-RL	0.263862	0.283162	0.10352	0.434225	1	0.128271	0.900111	0.711621	0.650426	0.339578	1	0.45631	slo	0.522591	18C	9.65997	2.94483	2.94483
CG10693-RM	1	1	24	1	CG10693-RM	0.263862	0.283162	0.10352	0.434225	1	0.128271	0.900111	0.711621	0.650426	0.339578	1	0.45631	slo	0.522591	18C	9.65997	2.94483	2.94483
CG10693-RN	1	1	24	1	CG10693-RN	0.263862	0.283162	0.10352	0.434225	1	0.128271	0.900111	0.711621	0.650426	0.339578	1	0.45631	slo	0.522591	18C	9.65997	2.94483	2.94483
CG10693-RO	1	1	24	1	CG10693-RO	0.263862	0.283162	0.10352	0.434225	1	0.128271	0.900111	0.711621	0.650426	0.339578	1	0.45631	slo	0.522591	18C	9.65997	2.94483	2.94483
CG10693-RP	1	1	24	1	CG10693-RP	0.263862	0.283162	0.10352	0.434225	1	0.128271	0.900111	0.711621	0.650426	0.339578	1	0.45631	slo	0.522591	18C	9.65997	2.94483	2.94483
CG10693-RQ	1	1	24	1	CG10693-RQ	0.263862	0.283162	0.10352	0.434225	1	0.128271	0.900111	0.711621	0.650426	0.339578	1	0.45631	slo	0.522591	18C	9.65997	2.94483	2.94483
CG10695-RA	0.576952	1	24	21	CG10695-RA	0.784276	0.661291	1	0.846987	0.835959	0.857836	0.613846	0.65718	0.485154	0.850337	1	0.777971	Pat1	0.780903	18C	1.62907	2.0612	1.62907
CG10697-RB	1	1	24	13	CG10697-RB	0.519939	1	0.723224	0.807024	0.649369	0.551473	1	0.6699	0.759041	0.729163	0.840233	0.777464	Ddc	0.752236	18C	1.9233	1.49276	1.49276
CG10697-RC	1	1	24	13	CG10697-RC	0.519939	1	0.723224	0.807024	0.649369	0.551473	1	0.6699	0.759041	0.729163	0.840233	0.777464	Ddc	0.752236	18C	1.9233	1.49276	1.49276
CG10697-RD	1	1	24	13	CG10697-RD	0.519939	1	0.723224	0.807024	0.649369	0.551473	1	0.6699	0.759041	0.729163	0.840233	0.777464	Ddc	0.752236	18C	1.9233	1.49276	1.49276
CG1070-RC	0.772187	1	24	3	CG1070-RC	1	0.919839	0.706188	0.370272	0.852719	0.875035	0.538591	1	0.729731	0.785054	0.899634	0.806704	Alh	0.790314	18C	2.70072	1.37037	1.37037
CG1070-RE	0.772187	1	24	3	CG1070-RE	1	0.919839	0.706188	0.370272	0.852719	0.875035	0.538591	1	0.729731	0.785054	0.899634	0.806704	Alh	0.790314	18C	2.70072	1.37037	1.37037
CG10701-RA	0.0931041	1	24	19	CG10701-RA	0.758411	0.710359	0.937471	0.97453	0.954811	1	0.737807	0.787439	0.818396	1	0.885134	0.955066	Moe	0.876619	18C	1.40774	1.26994	1.26994
CG10701-RB	0.0931041	1	24	19	CG10701-RB	0.758411	0.710359	0.937471	0.97453	0.954811	1	0.737807	0.787439	0.818396	1	0.885134	0.955066	Moe	0.876619	18C	1.40774	1.26994	1.26994
CG10701-RC	0.0931041	1	24	19	CG10701-RC	0.758411	0.710359	0.937471	0.97453	0.954811	1	0.737807	0.787439	0.818396	1	0.885134	0.955066	Moe	0.876619	18C	1.40774	1.26994	1.26994
CG10701-RD	0.0931041	1	24	19	CG10701-RD	0.758411	0.710359	0.937471	0.97453	0.954811	1	0.737807	0.787439	0.808898	1	0.889627	0.968392	Moe	0.877312	18C	1.40774	1.26994	1.26994
CG10701-RE	0.0931041	1	24	19	CG10701-RE	0.758411	0.710359	0.937471	0.97453	0.954811	1	0.737807	0.787439	0.818396	1	0.885134	0.955066	Moe	0.876619	18C	1.40774	1.26994	1.26994
CG10701-RF	0.0931041	1	24	19	CG10701-RF	0.758411	0.710359	0.937471	0.97453	0.954811	1	0.737807	0.787439	0.808898	1	0.889627	0.968392	Moe	0.877312	18C	1.40774	1.26994	1.26994
CG10701-RG	0.0931041	1	24	19	CG10701-RG	0.758411	0.710359	0.937471	0.97453	0.954811	1	0.737807	0.787439	0.818396	1	0.885134	0.955066	Moe	0.876619	18C	1.40774	1.26994	1.26994
CG10701-RH	0.0931041	1	24	19	CG10701-RH	0.758411	0.710359	0.937471	0.97453	0.954811	1	0.737807	0.787439	0.808898	1	0.889627	0.968392	Moe	0.877312	18C	1.40774	1.26994	1.26994
CG10701-RI	0.0931041	1	24	19	CG10701-RI	0.758411	0.710359	0.937471	0.97453	0.954811	1	0.737807	0.787439	0.818396	1	0.885134	0.955066	Moe	0.876619	18C	1.40774	1.26994	1.26994
CG10701-RJ	0.0931041	1	24	19	CG10701-RJ	0.758411	0.710359	0.937471	0.97453	0.954811	1	0.737807	0.787439	0.818396	1	0.885134	0.955066	Moe	0.876619	18C	1.40774	1.26994	1.26994
CG10702-RA	0.0931041	1	24	15	CG10702-RA	0.574751	0.950089	1	0.904718	0.615586	0.777472	0.701868	0.609988	0.984675	1	0.880577	0.662415	CG10702	0.805178	18C	1.73988	1.63938	1.63938
CG10702-RB	0.0931041	1	24	15	CG10702-RB	0.574751	0.950089	1	0.904718	0.615586	0.777472	0.701868	0.609988	0.984675	1	0.880577	0.662415	CG10702	0.805178	18C	1.73988	1.63938	1.63938
CG10702-RC	0.0931041	1	24	15	CG10702-RC	0.574751	0.950089	1	0.904718	0.615586	0.777472	0.701868	0.609988	0.984675	1	0.880577	0.662415	CG10702	0.805178	18C	1.73988	1.63938	1.63938
CG10703-RA	0.300911	1	24	13	CG10703-RA	0.686041	0.916906	0.938581	0.984244	1	0.547291	0.625099	0.436641	1	0.923417	0.482717	0.505883	GCC88	0.753902	18C	1.82718	2.29021	1.82718
CG10704-RA	1	1	24	1	CG10704-RA	0.734665	0.946083	0.864686	0.906753	0.974497	1	1	0.101358	0.602172	0.677138	0.394429	0.617438	toe	0.734935	18C	1.36117	9.86601	1.36117
CG10706-RA	0.576952	1	24	1	CG10706-RA	0.514265	0.194068	0.83808	0.1302	0.674652	1	0.8113	0.637296	0.563703	0.441452	1	0.889805	SK	0.641235	18C	7.68047	2.26525	2.26525
CG10706-RC	1	1	24	9	CG10706-RC	0.772446	1	0.437741	0.865108	0.731866	0.166893	1	0.385352	0.681705	0.435988	0.620791	0.442385	SK	0.628356	18C	5.99186	2.59503	2.59503
CG10706-RD	1	1	24	9	CG10706-RD	0.772446	1	0.437741	0.865108	0.731866	0.166893	1	0.385352	0.681705	0.435988	0.620791	0.442385	SK	0.628356	18C	5.99186	2.59503	2.59503
CG10706-RE	1	1	24	9	CG10706-RE	0.772446	1	0.437741	0.865108	0.731866	0.166893	1	0.385352	0.681705	0.435988	0.620791	0.442385	SK	0.628356	18C	5.99186	2.59503	2.59503
CG10706-RF	1	1	24	1	CG10706-RF	0.772446	1	0.437741	0.865108	0.731866	0.166893	0.84345	0.693117	0.876542	0.624429	0.961079	1	SK	0.747723	18C	5.99186	1.60146	1.60146
CG10706-RG	1	1	24	9	CG10706-RG	0.772446	1	0.437741	0.865108	0.731866	0.166893	1	0.385352	0.681705	0.435988	0.620791	0.442385	SK	0.628356	18C	5.99186	2.59503	2.59503
CG10706-RH	1	1	24	9	CG10706-RH	0.772446	1	0.437741	0.865108	0.731866	0.166893	1	0.385352	0.681705	0.435988	0.620791	0.442385	SK	0.628356	18C	5.99186	2.59503	2.59503
CG1071-RA	0.663955	1	24	21	CG1071-RA	0.187006	0.487376	0.770356	0.46162	0.620135	1	0.447119	0.381214	0.451378	0.620152	0.719259	1	E2f2	0.595468	18C	5.34743	2.6232	2.6232
CG10711-RA	1	1	24	13	CG10711-RA	0.834983	0.754576	1	0.614726	0.333102	0.769094	0.428111	1	0.667928	0.770845	0.848134	0.887852	Vps36	0.742446	18C	3.00208	1.49717	1.49717
CG10712-RA	0.880418	1	24	21	CG10712-RA	0.428554	0.814683	0.90792	0.66999	0.974497	1	0.3365	0.366944	0.125771	0.48153	0.466064	1	Chro	0.631038	18C	2.97177	7.95096	2.97177
CG10712-RB	0.880418	1	24	21	CG10712-RB	0.428554	0.814683	0.90792	0.66999	0.974497	1	0.3365	0.366944	0.125771	0.48153	0.466064	1	Chro	0.631038	18C	2.97177	7.95096	2.97177
CG10712-RC	0.880418	1	24	21	CG10712-RC	0.428554	0.814683	0.90792	0.66999	0.974497	1	0.3365	0.366944	0.125771	0.48153	0.466064	1	Chro	0.631038	18C	2.97177	7.95096	2.97177
CG10713-RA	1	1	24	1	CG10713-RA	1	0.744632	0.50442	0.293867	0.947466	0.972261	0.50149	0.293685	0	0.472984	1	0.211858	CG10713	0.578555	18C	3.4029	Inf	3.4029
CG10721-RA	1	1	24	3	CG10721-RA	0.558766	0.894697	0.584584	0.664109	1	0.784718	1	0.943991	0.633629	0.633463	0.561227	0.548564	CG10721	0.733979	18C	1.78966	1.82294	1.78966
CG10724-RA	0.576952	1	24	15	CG10724-RA	0.74361	0.764906	0.583476	0.7895	1	0.419797	0.459876	0.740615	0.946159	1	0.633179	0.744732	flr	0.735488	18C	2.3821	1.57933	1.57933
CG10724-RB	0.576952	1	24	15	CG10724-RB	0.74361	0.764906	0.583476	0.7895	1	0.419797	0.459876	0.740615	0.946159	1	0.633179	0.744732	flr	0.735488	18C	2.3821	1.57933	1.57933
CG10728-RA	1	1	24	3	CG10728-RA	1	0.839152	0.949843	0.90944	0.498666	0.716403	0.49622	1	0.23729	0.523073	0.623628	0.702883	vls	0.70805	18C	2.01524	4.21425	2.01524
CG10731-RA	1	1	24	21	CG10731-RA	0.550999	0.608196	0.40352	0.574277	0.556856	1	0.257294	0.587642	0.914118	0.598582	0.542376	1	CG10731	0.632822	18C	3.88661	1.84374	1.84374
CG10732-RA	1	1	24	15	CG10732-RA	0.734665	0.360413	0.40352	0.725402	0.139214	1	0.0780096	0.719528	0.98648	0.662178	1	0.296602	CG10732	0.592168	18C	12.8189	3.37153	3.37153
CG10732-RB	1	1	24	15	CG10732-RB	0.617118	0.946083	0.887744	0.930933	0.974497	1	0.195371	0.858105	1	0.737062	0.834816	0.577752	CG10732	0.796623	18C	5.11847	1.73085	1.73085
CG10733-RA	1	1	24	3	CG10733-RA	0.423513	0.602896	0.569675	0.634727	0.51591	1	0.875231	0.847466	0.718691	0.712915	0.702637	1	loj	0.716972	18C	2.3612	1.42321	1.42321
CG10733-RB	1	1	24	3	CG10733-RB	0.423513	0.602896	0.569675	0.634727	0.51591	1	0.875231	0.847466	0.718691	0.712915	0.702637	1	loj	0.716972	18C	2.3612	1.42321	1.42321
CG10733-RC	1	1	24	3	CG10733-RC	0.423513	0.602896	0.569675	0.634727	0.51591	1	0.875231	0.847466	0.718691	0.712915	0.702637	1	loj	0.716972	18C	2.3612	1.42321	1.42321
CG10737-RA	1	1	24	15	CG10737-RA	0.766456	0.84756	0.916892	0.837434	1	0.439787	0.495748	0.988665	0.714042	0.644486	1	0.622637	CG10737	0.772809	18C	2.27383	1.60607	1.60607
CG10737-RC	1	1	24	15	CG10737-RC	0.766456	0.84756	0.916892	0.837434	1	0.439787	0.495748	0.988665	0.714042	0.644486	1	0.622637	CG10737	0.772809	18C	2.27383	1.60607	1.60607
CG10737-RD	1	1	24	15	CG10737-RD	0.766456	0.84756	0.916892	0.837434	1	0.439787	0.495748	0.988665	0.714042	0.644486	1	0.622637	CG10737	0.772809	18C	2.27383	1.60607	1.60607
CG10737-RE	0.772187	1	24	13	CG10737-RE	0.600984	0.950012	0.754502	1	0.759215	0.753114	0.601507	0.957157	0.804583	0.635517	1	0.574874	CG10737	0.782622	18C	1.66394	1.73951	1.66394
CG10737-RN	1	1	24	15	CG10737-RN	0.766456	0.84756	0.916892	0.837434	1	0.439787	0.495748	0.988665	0.714042	0.644486	1	0.622637	CG10737	0.772809	18C	2.27383	1.60607	1.60607
CG10737-RO	0.772187	1	24	13	CG10737-RO	0.600834	0.97136	0.771457	1	0.776276	0.716932	0.601507	0.957157	0.804583	0.635517	1	0.574874	CG10737	0.784208	18C	1.66435	1.73951	1.66435
CG10737-RP	1	1	24	15	CG10737-RP	0.766456	0.84756	0.916892	0.837434	1	0.439787	0.495748	0.988665	0.714042	0.644486	1	0.622637	CG10737	0.772809	18C	2.27383	1.60607	1.60607
CG10737-RQ	1	1	24	15	CG10737-RQ	0.870663	0.920807	1	0.851379	0.932522	0.539804	0.601507	0.957157	0.804583	0.635517	1	0.574874	CG10737	0.807401	18C	1.85252	1.73951	1.73951
CG10737-RR	0.421631	1	24	13	CG10737-RR	0.86715	0.934607	1	0.897299	0.871389	0.485419	0.601507	0.957157	0.804583	0.635517	1	0.574874	CG10737	0.802458	18C	2.06008	1.73951	1.73951
CG10737-RT	1	1	24	15	CG10737-RT	0.766456	0.84756	0.916892	0.837434	1	0.439787	0.495748	0.988665	0.714042	0.644486	1	0.622637	CG10737	0.772809	18C	2.27383	1.60607	1.60607
CG10737-RU	1	1	24	15	CG10737-RU	0.766456	0.84756	0.916892	0.837434	1	0.439787	0.495748	0.988665	0.714042	0.644486	1	0.622637	CG10737	0.772809	18C	2.27383	1.60607	1.60607
CG10739-RA	1	1	24	9	CG10739-RA	0.863322	1	0.526873	0.947153	0.908853	0.559583	0.738068	0.309438	1	0.601189	0.372716	0.425185	pigeon	0.687698	18C	1.89799	3.23167	1.89799
CG1074-RA	1	1	24	21	CG1074-RA	0.520852	0.958201	0.544918	1	0.657987	0.675206	0	0.634878	0.0621731	0.324597	1	0.785122	CG1074	0.596995	18C	Inf	16.0841	16.0841
CG10741-RA	1	1	24	21	CG10741-RA	0.791585	0.728131	0.72464	0.651338	1	0.769627	0.591776	0	0.712702	0.930229	0.505729	1	Tgi	0.70048	18C	1.68983	Inf	1.68983
CG10741-RB	1	1	24	21	CG10741-RB	0.791585	0.728131	0.72464	0.651338	1	0.769627	0.591776	0	0.712702	0.930229	0.505729	1	Tgi	0.70048	18C	1.68983	Inf	1.68983
CG10742-RA	1	1	24	1	CG10742-RA	0.91032	0.502409	1	0.524325	0.862497	0.531041	0.591776	0.563157	0.267263	0.372091	0.168576	1	Tsp3A	0.607788	18C	1.99041	5.93203	1.99041
CG10743-RA	1	1	24	3	CG10743-RA	0.664259	0.748982	0.420333	0.652358	0.690269	1	0.804106	0.859912	1	0.626503	0.786778	0.635092	Liprin-beta	0.740716	18C	2.37906	1.59616	1.59616
CG10743-RB	1	1	24	3	CG10743-RB	0.664259	0.748982	0.420333	0.652358	0.690269	1	0.804106	0.859912	1	0.626503	0.786778	0.635092	Liprin-beta	0.740716	18C	2.37906	1.59616	1.59616
CG10746-RA	1	1	24	13	CG10746-RA	0.519478	0.753414	0.51113	0.630983	1	0.609288	0.695321	0.90607	0.888299	1	0.646746	0.667009	fok	0.735645	18C	1.95645	1.5462	1.5462
CG10747-RA	0.880418	1	24	21	CG10747-RA	0.58636	0.431485	0.644125	0.0964945	1	0.456076	0.68832	0.226742	0.99477	0.421976	1	0.959593	CG10747	0.625495	18C	10.3633	4.4103	4.4103
CG10751-RA	1	1	24	1	CG10751-RA	1	0.782594	0.836964	0.59557	0.866254	0.851886	0.970544	0.751882	1	0.809578	0.908613	0.760276	robl	0.844513	18C	1.67906	1.33	1.33
CG10753-RA	0.300911	1	24	3	CG10753-RA	0.955064	0.675774	0.172937	0.544052	0.69607	1	0.777897	1	0.822606	0.644206	0.437787	0.889701	SmD1	0.718008	18C	5.78245	2.28422	2.28422
CG10754-RA	1	1	24	15	CG10754-RA	0.888798	0.936777	0.958922	0.777034	1	0.378063	0.433969	0.346558	0.855243	0.520928	0.494491	1	CG10754	0.715899	18C	2.64506	2.88552	2.64506
CG10755-RA	0.248511	1	24	13	CG10755-RA	0.546192	0.893172	1	0.898843	0.689998	0.354027	0.34597	0	1	0.652607	0.41393	0.78925	Cyp4ae1	0.631999	18C	2.89043	Inf	2.89043
CG10756-RA	1	1	24	9	CG10756-RA	0.403553	0.552047	0.487153	0.638566	1	0.663992	0.708329	1	0.639805	0.349939	0.504446	0.40611	Taf13	0.612828	18C	2.47799	2.85764	2.47799
CG10757-RA	1	1	24	13	CG10757-RA	0.93184	1	0.835624	0.739359	0.819823	0.71185	0.330474	0.526169	0.447755	1	0.423632	0.540993	mRpS18B	0.692293	18C	3.02596	2.36054	2.36054
CG10757-RB	1	1	24	13	CG10757-RB	0.93184	1	0.835624	0.739359	0.819823	0.71185	0.330474	0.526169	0.447755	1	0.423632	0.540993	mRpS18B	0.692293	18C	3.02596	2.36054	2.36054
CG10763-RA	1	1	24	15	CG10763-RA	0.506708	0.67795	1	0.416933	0.901985	0.686728	1	0.745842	0.792482	0.952054	0.967467	0.633686	Gbeta5	0.773486	18C	2.39847	1.57807	1.57807
CG10772-RA	1	1	24	21	CG10772-RA	0.171422	0.420481	0.60528	0.352626	0.487249	1	0.347175	0.166348	0.256573	0.208371	0.350639	1	Fur1	0.44718	18C	5.83357	6.0115	5.83357
CG10772-RB	0.027207	1	24	23	CG10772-RB	0.342844	0.483554	0.457323	0.677042	0.909531	1	0.789034	0.727772	0.546405	0.496122	0.988981	1	Fur1	0.701551	18C	2.91678	2.01563	2.01563
CG10772-RC	0.027207	1	24	23	CG10772-RC	0.342844	0.483554	0.457323	0.677042	0.909531	1	0.789034	0.727772	0.546405	0.496122	0.988981	1	Fur1	0.701551	18C	2.91678	2.01563	2.01563
CG10772-RD	0.027207	1	24	23	CG10772-RD	0.342844	0.483554	0.457323	0.677042	0.909531	1	0.789034	0.727772	0.546405	0.496122	0.988981	1	Fur1	0.701551	18C	2.91678	2.01563	2.01563
CG10772-RE	1	1	24	21	CG10772-RE	0.342844	0.483554	0.457323	0.677042	0.909531	1	0.656367	1	0.685505	0.631954	0.64273	0.554574	Fur1	0.670119	18C	2.91678	1.80319	1.80319
CG10772-RF	0.027207	1	24	23	CG10772-RF	0.342844	0.483554	0.457323	0.677042	0.909531	1	0.789034	0.727772	0.546405	0.496122	0.988981	1	Fur1	0.701551	18C	2.91678	2.01563	2.01563
CG10777-RB	1	1	24	15	CG10777-RB	0.585198	0.67422	0.960099	0.671206	0.672067	1	0.852825	0.531494	0.791141	1	0.699274	0.730302	CG10777	0.763986	18C	1.70882	1.88149	1.70882
CG10778-RA	0.141715	1	24	1	CG10778-RA	1	0.613226	0.238808	0.572401	0.906272	0.929989	0.931781	0.685265	0.861213	0.327001	1	0.851356	CG10778	0.743109	18C	4.18747	3.05809	3.05809
CG1078-RA	0.880418	1	24	1	CG1078-RA	0.385699	0.867243	0.40352	0.687621	0.730873	1	0.623888	0.79789	0.762425	0.432665	0.940891	1	Fip1	0.719393	18C	2.5927	2.31126	2.31126
CG1079-RA	1	1	24	5	CG1079-RA	0.692684	0.733697	0.741159	0.854938	0.457417	1	1	0.759326	0.77568	0.767314	0.622841	0.758991	Fie	0.763671	18C	2.18619	1.60555	1.60555
CG10794-RA	1	1	24	13	CG10794-RA	0.505246	0.230279	0.334834	1	0.1876	0.258892	0.193642	0.133851	0.329746	1	0.165486	0.402322	DptB	0.395158	18C	5.33049	7.471	5.33049
CG10795-RA	1	1	24	9	CG10795-RA	0.53102	0.748962	1	0.6991	0.754685	0.567919	1	0.494121	0.629055	0.555789	0.503601	0.611054	CG10795	0.674609	18C	1.88317	2.0238	1.88317
CG10798-RA	1	1	24	21	CG10798-RA	0.374011	0.602053	0.220102	0.346215	0.885907	1	0.299217	0.867382	1	0.931288	0.409135	0.644673	dm	0.631665	18C	4.54335	2.44418	2.44418
CG10799-RA	1	1	24	13	CG10799-RA	0.586286	0.786463	0.867351	1	0.613349	0.843159	0.641974	0.987505	0.646285	0.885551	0.819317	1	CG10799	0.806437	18C	1.70565	1.5473	1.5473
CG10800-RA	1	1	24	15	CG10800-RA	0.32726	0.34403	0.550254	0.500088	0.442953	1	0.52283	0.623299	0.629668	0.610518	1	0.252427	Rca1	0.566944	18C	3.05568	3.96154	3.05568
CG10802-RA	0.027207	1	24	5	CG10802-RA	1	0.752596	0.570657	0.448815	0.344533	0.530324	1	0.48314	0.451629	0.22007	0.56973	0.506949	CG10802	0.573204	18C	2.90248	4.54401	2.90248
CG10803-RA	0.576952	1	24	21	CG10803-RA	0.187006	0.0573384	0.110051	0.269278	0.177181	1	0.597012	0.0629325	0.7981	0.495507	1	0.242124	CG10803	0.416377	18C	17.4403	15.89	15.89
CG10804-RA	1	1	24	15	CG10804-RA	0.74709	0.727627	1	0.723207	0.916031	0.34182	0.662668	0.474005	0.547256	1	0.711937	0.695873	CG10804	0.712293	18C	2.92552	2.10968	2.10968
CG10804-RB	1	1	24	15	CG10804-RB	0.74709	0.727627	1	0.723207	0.916031	0.34182	0.662668	0.474005	0.547256	1	0.711937	0.695873	CG10804	0.712293	18C	2.92552	2.10968	2.10968
CG10804-RC	1	1	24	15	CG10804-RC	0.74709	0.727627	1	0.723207	0.916031	0.34182	0.662668	0.474005	0.547256	1	0.711937	0.695873	CG10804	0.712293	18C	2.92552	2.10968	2.10968
CG10805-RA	1	1	24	13	CG10805-RA	0.142979	0.569911	0.448756	1	0.677339	0.278026	0.394517	0.519837	0.623614	0.372091	0.168576	1	l(2)k09022	0.516304	18C	6.99403	5.93203	5.93203
CG10806-RA	1	1	24	9	CG10806-RA	0.637224	0.439608	1	0.589866	0.150937	0.929322	0.553551	0.364695	1	0.522086	0.551906	0.701555	Nha1	0.620062	18C	6.62528	2.74202	2.74202
CG10806-RB	1	1	24	9	CG10806-RB	0.637224	0.439608	1	0.589866	0.150937	0.929322	0.553551	0.364695	1	0.522086	0.551906	0.701555	Nha1	0.620062	18C	6.62528	2.74202	2.74202
CG10808-RA	1	1	24	11	CG10808-RA	0.484014	0.844054	0.534071	0.696955	0.429925	1	0.753157	0.712987	0.898254	1	0.662391	0.871124	Syngr	0.740578	18C	2.32599	1.50968	1.50968
CG10809-RA	0.772187	1	24	19	CG10809-RA	0.356845	0.62522	1	0.461406	0.772797	0.892149	0.666455	0.0399163	0.656707	1	0.673104	0.883039	CG10809	0.66897	18C	2.80233	25.0525	2.80233
CG1081-RA	1	1	24	13	CG1081-RA	1	0.913026	0.828245	0.987392	0.421096	0.712991	0.691871	0.834689	0.539719	1	0.629664	0.688959	Rheb	0.770638	18C	2.37476	1.85281	1.85281
CG1081-RB	1	1	24	13	CG1081-RB	1	0.913026	0.828245	0.987392	0.421096	0.712991	0.691871	0.834689	0.539719	1	0.629664	0.688959	Rheb	0.770638	18C	2.37476	1.85281	1.85281
CG10810-RA	1	1	24	13	CG10810-RA	0.615932	0.808517	0.726085	1	0.757817	0.753052	0.552865	1	0.973832	0.602126	0.62892	0.707681	Drs	0.760569	18C	1.80876	1.66078	1.66078
CG10811-RA	1	1	24	3	CG10811-RA	0.872693	0.764512	0.758128	0.782189	0.708725	1	0.665136	0.661611	0.789273	0.639628	0.685451	1	eIF4G	0.777279	18C	1.50345	1.56341	1.50345
CG10811-RB	1	1	24	3	CG10811-RB	0.872693	0.764512	0.758128	0.782189	0.708725	1	0.665136	0.661611	0.789273	0.639628	0.685451	1	eIF4G	0.777279	18C	1.50345	1.56341	1.50345
CG10811-RC	1	1	24	3	CG10811-RC	0.872693	0.764512	0.758128	0.782189	0.708725	1	0.665136	0.661611	0.789273	0.639628	0.685451	1	eIF4G	0.777279	18C	1.50345	1.56341	1.50345
CG10812-RA	1	1	24	21	CG10812-RA	0.874154	0.88175	0.842161	1	0.496661	0.745981	0.584348	0.556813	0.702265	0.691249	0.905657	1	Drsl5	0.77342	18C	2.01345	1.79593	1.79593
CG10814-RA	0.880418	1	24	23	CG10814-RA	0.420763	0.114677	0.40352	0.269278	0.442953	1	0	0.202159	0.395946	0.0620152	0.374614	1	CG10814	0.390494	18C	Inf	16.1251	16.1251
CG10824-RA	0.576952	1	24	7	CG10824-RA	0.503914	0.545318	0.465174	1	0.224678	0.403477	0.571072	1	0.332572	0.23387	0.455928	0.780899	CG10824	0.543075	18C	4.45081	4.27588	4.27588
CG10825-RA	1	1	24	9	CG10825-RA	1	0.613226	0.523102	0.411413	0.631644	0	1	0.109805	0.827987	0.943157	0.356081	0.844915	Ice2	0.605111	18C	Inf	9.10709	9.10709
CG10825-RC	1	1	24	9	CG10825-RC	1	0.613226	0.523102	0.411413	0.631644	0	1	0.109805	0.827987	0.943157	0.356081	0.844915	Ice2	0.605111	18C	Inf	9.10709	9.10709
CG10833-RA	0.663955	1	24	9	CG10833-RA	0.79823	1	0.854825	0.918964	0.766034	0.786081	0.766944	1	0.736216	0.76779	0.771091	0.773791	Cyp28d1	0.82833	18C	1.30543	1.3583	1.30543
CG10837-RA	0.209359	1	24	15	CG10837-RA	0.666739	0.66246	0.953607	1	0.831622	0.820563	0.764884	1	0.857778	0.854444	0.957579	0.795658	eIF-4B	0.847111	18C	1.50952	1.25682	1.25682
CG10837-RB	0.772187	1	24	5	CG10837-RB	1	0.952691	0.700583	0.70528	0.845952	0.520854	0.801173	0.79975	0.855243	0.686938	0.63281	1	eIF-4B	0.791773	18C	1.91992	1.58025	1.58025
CG10837-RE	0.0592039	1	24	15	CG10837-RE	0.756558	0.774881	0.997814	1	0.823573	0.782523	0.764884	1	0.857778	0.854444	0.957579	0.795658	eIF-4B	0.863808	18C	1.32178	1.25682	1.25682
CG1084-RA	1	1	24	13	CG1084-RA	0.485695	0.648242	0.650115	0.846303	0.649665	1	1	0.928633	0.800029	0.73656	0.781345	0.531089	Cont	0.754806	18C	2.05891	1.88292	1.88292
CG10840-RB	1	1	24	13	CG10840-RB	0.783255	0.993188	1	0.655406	0.930778	0.80025	0.85909	0.85257	0.594264	1	0.701648	0.861382	eIF5B	0.835986	18C	1.52577	1.68276	1.52577
CG10842-RA	0.421631	1	24	5	CG10842-RA	0.886177	0.9281	0.664091	0.663627	1	0.716383	0.690553	1	0.515673	0.406256	0.461597	0.589235	Cyp4p1	0.710141	18C	1.50687	2.4615	1.50687
CG10843-RA	0.576952	1	24	23	CG10843-RA	0.707115	0.551882	0.30264	0.634727	0.730873	1	1	0.585624	0.652354	0.576374	0.949551	0.281638	Cyp4p3	0.664398	18C	3.30426	3.55065	3.30426
CG10844-RA	0.141715	1	24	13	CG10844-RA	0.517057	1	0.801019	0.71999	0.72856	0.747627	0.511826	0.696402	1	0.766075	0.679879	0.571115	RyR	0.728296	18C	1.95379	1.75096	1.75096
CG10844-RB	0.141715	1	24	13	CG10844-RB	0.517057	1	0.801019	0.71999	0.72856	0.747627	0.511826	0.696402	1	0.766075	0.679879	0.571115	RyR	0.728296	18C	1.95379	1.75096	1.75096
CG10844-RC	0.141715	1	24	13	CG10844-RC	0.517057	1	0.801019	0.71999	0.72856	0.747627	0.511826	0.696402	1	0.766075	0.679879	0.571115	RyR	0.728296	18C	1.95379	1.75096	1.75096
CG10844-RD	0.141715	1	24	13	CG10844-RD	0.517057	1	0.801019	0.71999	0.72856	0.747627	0.511826	0.696402	1	0.766075	0.679879	0.571115	RyR	0.728296	18C	1.95379	1.75096	1.75096
CG10846-RA	1	1	24	1	CG10846-RA	0.746018	0.343109	1	0.792882	0.471218	0.906656	1	0.542564	0.531329	0.832197	0.527838	0.745513	dyn-p25	0.703277	18C	2.91453	1.89452	1.89452
CG10847-RA	1	1	24	1	CG10847-RA	0.500661	0.697015	0.732603	0.467627	1	0.920922	1	0.59199	0.575991	0.553592	0.792668	0.35817	enc	0.682603	18C	2.13846	2.79197	2.13846
CG10847-RB	1	1	24	1	CG10847-RB	0.500661	0.697015	0.732603	0.467627	1	0.920922	1	0.59199	0.575991	0.553592	0.792668	0.35817	enc	0.682603	18C	2.13846	2.79197	2.13846
CG10847-RD	1	1	24	1	CG10847-RD	0.500661	0.697015	0.732603	0.467627	1	0.920922	1	0.59199	0.575991	0.553592	0.792668	0.35817	enc	0.682603	18C	2.13846	2.79197	2.13846
CG10847-RE	1	1	24	1	CG10847-RE	0.500661	0.697015	0.732603	0.467627	1	0.920922	1	0.59199	0.575991	0.553592	0.792668	0.35817	enc	0.682603	18C	2.13846	2.79197	2.13846
CG10849-RA	0.576952	1	24	13	CG10849-RA	0.779983	0.978859	0.977328	1	0.962428	0.540837	0.649122	1	0.697173	0.767565	0.803127	0.720356	Sc2	0.823065	18C	1.84899	1.43436	1.43436
CG10850-RA	1	1	24	3	CG10850-RA	0.514265	0.704925	0.522202	0.696955	0.458587	1	0.379462	1	0.685505	0.357892	0.713431	0.577104	ida	0.634194	18C	2.63531	2.79414	2.63531
CG10850-RB	1	1	24	3	CG10850-RB	0.514265	0.704925	0.522202	0.696955	0.458587	1	0.379462	1	0.685505	0.357892	0.713431	0.577104	ida	0.634194	18C	2.63531	2.79414	2.63531
CG10851-RA	1	1	24	21	CG10851-RA	0.727497	0.784557	0.836566	0.866944	0.974497	1	0.836896	1	0.685505	0.808934	0.772957	0.816905	B52	0.842605	18C	1.37458	1.45878	1.37458
CG10851-RB	1	1	24	21	CG10851-RB	0.727497	0.784557	0.836566	0.866944	0.974497	1	0.8265	1	0.68081	0.799129	0.772957	0.816905	B52	0.84053	18C	1.37458	1.46884	1.37458
CG10851-RC	1	1	24	21	CG10851-RC	0.727497	0.784557	0.836566	0.866944	0.974497	1	0.836896	1	0.685505	0.808934	0.772957	0.816905	B52	0.842605	18C	1.37458	1.45878	1.37458
CG10851-RD	1	1	24	21	CG10851-RD	0.727497	0.784557	0.836566	0.866944	0.974497	1	0.836896	1	0.685505	0.808934	0.772957	0.816905	B52	0.842605	18C	1.37458	1.45878	1.37458
CG10851-RE	1	1	24	21	CG10851-RE	0.727497	0.784557	0.836566	0.866944	0.974497	1	0.836896	1	0.685505	0.808934	0.772957	0.816905	B52	0.842605	18C	1.37458	1.45878	1.37458
CG10851-RG	1	1	24	21	CG10851-RG	0.727497	0.784557	0.836566	0.866944	0.974497	1	0.836896	1	0.685505	0.808934	0.772957	0.816905	B52	0.842605	18C	1.37458	1.45878	1.37458
CG10851-RH	1	1	24	21	CG10851-RH	0.727497	0.784557	0.836566	0.866944	0.974497	1	0.836896	1	0.685505	0.808934	0.772957	0.816905	B52	0.842605	18C	1.37458	1.45878	1.37458
CG10855-RA	1	1	24	15	CG10855-RA	0.175908	0.323614	0.690133	0.289483	1	0.342057	0.674717	0.762038	0.52238	1	0.411864	0.366479	ntc	0.546556	18C	5.68479	2.72867	2.72867
CG1086-RD	1	1	24	15	CG1086-RD	0.485504	0.707094	1	0.499357	0.574998	0.590046	0.681294	0.448855	1	0.829982	0.63075	0.683567	Glut1	0.677621	18C	2.05971	2.22789	2.05971
CG10861-RB	0.576952	1	24	9	CG10861-RB	0.889483	1	0.911194	0.996185	0.795935	0.528495	1	0.625553	0.939754	0.581137	0.552466	0.704096	Atg12	0.793691	18C	1.89217	1.81007	1.81007
CG10863-RA	1	1	24	21	CG10863-RA	0.843577	0.942544	0.945193	1	0.921181	0.993943	0.699218	0.773711	0.696128	0.893566	0.750237	1	CG10863	0.871608	18C	1.43017	1.43652	1.43017
CG10866-RA	1	1	24	3	CG10866-RA	0.593689	0.647228	0.87992	0.59706	1	0.897899	0.740855	1	0.571254	0.306765	0.231633	0.778632	CG10866	0.687078	18C	1.68438	4.31717	1.68438
CG10874-RA	0.576952	1	24	17	CG10874-RA	0.527724	0.707906	0.3882	0.624199	1	0.577221	0.649415	0.593754	0.730244	1	0.894775	0.671878	CG10874	0.69711	18C	2.57599	1.6842	1.6842
CG10874-RB	0.576952	1	24	17	CG10874-RB	0.527724	0.707906	0.3882	0.624199	1	0.577221	0.649415	0.593754	0.730244	1	0.894775	0.671878	CG10874	0.69711	18C	2.57599	1.6842	1.6842
CG1088-RA	1	1	24	3	CG1088-RA	0.994979	0.99781	0.862667	0.945344	1	0.87652	0.838519	1	0.698881	0.904332	0.648573	0.924304	Vha26	0.890994	18C	1.19258	1.54185	1.19258
CG1088-RB	1	1	24	3	CG1088-RB	0.994979	0.99781	0.862667	0.945344	1	0.87652	0.838519	1	0.698881	0.904332	0.648573	0.924304	Vha26	0.890994	18C	1.19258	1.54185	1.19258
CG10880-RA	1	1	24	9	CG10880-RA	0.858273	1	0.673447	0.141242	0.487911	0.500679	0.73122	0.481748	0.660481	1	0.187469	0.741382	CG10880	0.621988	18C	7.08004	5.33421	5.33421
CG10888-RA	0.300911	1	24	3	CG10888-RA	1	0.922632	0.863262	0.971206	0.845643	0.935071	0.952306	0.878982	0.887868	0.840348	0.986399	1	Rh3	0.923643	18C	1.18253	1.18998	1.18253
CG10889-RA	1	1	24	21	CG10889-RA	0.226489	1	0.568689	0.745444	0.686689	0.440412	0.139241	0.183472	0.167695	0	0.277655	1	CG10889	0.452982	18C	7.18177	Inf	7.18177
CG1089-RA	1	1	24	21	CG1089-RA	0.400541	0.290281	1	0.449422	0.620998	0.637249	0.468846	0.60271	0.299541	0.496122	0.381129	1	alpha-Est5	0.553903	18C	3.44494	3.33844	3.33844
CG10895-RA	1	1	24	1	CG10895-RA	0.967493	0.485421	0.966187	0.651338	1	0.513085	1	0.146406	0.802897	0.419181	0.807118	0.211229	lok	0.664196	18C	2.06007	6.83032	2.06007
CG10895-RB	1	1	24	1	CG10895-RB	0.967493	0.485421	0.966187	0.651338	1	0.513085	1	0.146406	0.802897	0.419181	0.807118	0.211229	lok	0.664196	18C	2.06007	6.83032	2.06007
CG10895-RC	1	1	24	1	CG10895-RC	0.967493	0.485421	0.966187	0.651338	1	0.513085	1	0.146406	0.802897	0.419181	0.807118	0.211229	lok	0.664196	18C	2.06007	6.83032	2.06007
CG10897-RA	1	1	24	21	CG10897-RA	1	0.613226	0.33628	0.235093	0.676761	0.416683	0	0.0873168	0.29928	1	0.679576	0.167969	tou	0.459349	18C	Inf	11.4526	11.4526
CG10897-RC	1	1	24	21	CG10897-RC	1	0.613226	0.33628	0.235093	0.676761	0.416683	0	0.0873168	0.29928	1	0.679576	0.167969	tou	0.459349	18C	Inf	11.4526	11.4526
CG10898-RA	1	1	24	15	CG10898-RA	0.868087	0.372634	0.681148	1	0.328993	0.168801	0.767417	0.427264	0.790806	0.448549	0.508038	1	CG10898	0.613478	18C	5.92412	2.34048	2.34048
CG1090-RA	1	1	24	13	CG1090-RA	0.326144	1	0.818912	0.697736	0.988832	0.634194	0.632437	1	0.457003	0.572628	0.562097	0.609165	CG1090	0.691596	18C	3.06613	2.18817	2.18817
CG1090-RB	1	1	24	13	CG1090-RB	0.326144	1	0.818912	0.697736	0.988832	0.634194	0.632437	1	0.457003	0.572628	0.562097	0.609165	CG1090	0.691596	18C	3.06613	2.18817	2.18817
CG10903-RA	1	1	24	15	CG10903-RA	0.424816	0.694689	1	0.466067	0.536665	0.963741	1	0.391735	0.732372	0.611777	0.762207	0.445293	CG10903	0.669114	18C	2.35396	2.55274	2.35396
CG10904-RA	0.663955	1	24	9	CG10904-RA	0.531756	1	0.778856	0.612561	0.201528	0.551473	0.593941	1	0.432166	0.311211	0.930562	0.48092	CG10904	0.618748	18C	4.96208	3.21326	3.21326
CG10907-RA	1	1	24	21	CG10907-RA	0.0659654	0.121355	0.15528	0.108556	1	0.384814	0.401783	1	0.161295	0.631574	0.343362	0.622367	CG10907	0.416363	18C	15.1595	6.19981	6.19981
CG10908-RA	0.489949	1	24	21	CG10908-RA	0.761874	0.893523	0.844403	0.79145	0.86622	1	0.785312	0.720907	0.729511	0.803858	0.804713	1	Der-1	0.833481	18C	1.31255	1.38714	1.31255
CG1091-RA	1	1	24	21	CG1091-RA	0.684492	0.659605	0.602855	1	0.71471	0.733413	1	0.838508	0.728766	0.868133	0.844884	0.820911	CG1091	0.791356	18C	1.65877	1.37218	1.37218
CG1091-RB	1	1	24	21	CG1091-RB	0.684492	0.659605	0.602855	1	0.71471	0.733413	1	0.838508	0.728766	0.868133	0.844884	0.820911	CG1091	0.791356	18C	1.65877	1.37218	1.37218
CG10913-RA	0.576952	1	24	21	CG10913-RA	0.589809	0.59012	0.901233	0.48531	1	0.784718	0.943898	0.52816	0.583962	1	0.906101	0.770201	Spn55B	0.756959	18C	2.06054	1.89337	1.89337
CG10914-RA	1	1	24	15	CG10914-RA	1	0.306613	0.392327	0.30856	0.710599	0.48613	0.302934	0.0997906	0.513052	1	0.485411	0.239956	CG10914	0.487115	18C	3.30105	10.021	3.30105
CG10915-RA	1	1	24	9	CG10915-RA	1	0.450534	0.272227	0.369432	0.464065	0.277789	0.625733	0.801597	0.659398	1	0.861539	0.286374	CG10915	0.589057	18C	3.67341	3.49194	3.49194
CG10916-RA	0.772187	1	24	9	CG10916-RA	0.659227	1	0.939244	0.899291	0.657468	0.877077	0.691756	0.854527	0.829859	0.550492	0.434142	1	CG10916	0.782757	18C	1.52099	2.3034	1.52099
CG10917-RA	1	1	24	13	CG10917-RA	0.23296	1	0.365586	0.766743	0.441443	0.905991	0.492046	0.324173	1	0.928152	0.341656	0.155901	fj	0.579554	18C	4.29258	6.41432	4.29258
CG1092-RA	0.421631	1	24	23	CG1092-RA	1	0.638777	0.768306	0.582836	0.789555	0.688685	0.877608	0.578192	0.467917	0.718509	1	0.865088	CG1092	0.747956	18C	1.71575	2.13713	1.71575
CG1092-RB	0.489949	1	24	23	CG1092-RB	0.844358	0.809035	0.924779	0.825028	1	0.820936	0.877608	0.578192	0.467917	0.718509	1	0.865088	CG1092	0.810954	18C	1.23604	2.13713	1.23604
CG10922-RA	1	1	24	21	CG10922-RA	0.495218	0.443841	0.597807	0.532857	0.794035	1	0.787032	1	0.609338	0.821827	0.728644	0.724348	La	0.711246	18C	2.25306	1.64113	1.64113
CG1093-RA	1	1	24	15	CG1093-RA	0.910169	1	0.624896	0.717707	0.574903	0.663691	0.716058	0.322177	0.946516	0.971853	1	0.863243	plx	0.775934	18C	1.73943	3.10389	1.73943
CG1093-RB	1	1	24	15	CG1093-RB	0.910169	1	0.624896	0.717707	0.574903	0.663691	0.716058	0.322177	0.946516	0.971853	1	0.863243	plx	0.775934	18C	1.73943	3.10389	1.73943
CG10932-RA	0.353312	1	24	1	CG10932-RA	0.868537	0.906838	0.889537	0.83878	0.918193	1	0.735818	0.784813	0.471437	0.630287	0.818612	1	CG10932	0.821904	18C	1.35903	2.12117	1.35903
CG10933-RA	1	1	24	1	CG10933-RA	1	0.681363	0.261551	0.457126	0.631644	0	0.443832	0.194939	0.668158	0.744183	0.969314	1	CG10933	0.587676	18C	Inf	5.12981	5.12981
CG10936-RA	0.0729854	1	24	7	CG10936-RA	0.85081	1	0.778856	0.408374	0.806113	0.689341	0.671356	1	0.975526	0.495543	0.324287	0.887852	CG10936	0.740671	18C	2.44874	3.08369	2.44874
CG10936-RB	0.0729854	1	24	7	CG10936-RB	0.85081	1	0.778856	0.408374	0.806113	0.689341	0.671356	1	0.975526	0.495543	0.324287	0.887852	CG10936	0.740671	18C	2.44874	3.08369	2.44874
CG10938-RA	0.209359	1	24	11	CG10938-RA	0.719137	1	0.917938	0.795912	0.988449	0.728732	0.933098	0.836863	1	0.839029	0.618978	0.551321	Prosalpha5	0.827455	18C	1.39056	1.81383	1.39056
CG10938-RB	0.209359	1	24	11	CG10938-RB	0.719137	1	0.917938	0.795912	0.988449	0.728732	0.933098	0.836863	1	0.839029	0.618978	0.551321	Prosalpha5	0.827455	18C	1.39056	1.81383	1.39056
CG10939-RA	0.421631	1	24	3	CG10939-RA	1	0.85657	0.523102	0.653037	0.571487	0.771636	0.725638	1	0.757663	0.734621	0.773736	0.860593	Sip1	0.769007	18C	1.91167	1.36125	1.36125
CG10944-RA	1	1	24	13	CG10944-RA	0.859011	0.920286	0.847717	1	0.792212	0.773903	0.799008	1	0.803743	0.915517	0.934832	0.957931	RpS6	0.88368	18C	1.29215	1.24418	1.24418
CG10944-RB	1	1	24	13	CG10944-RB	0.859011	0.920286	0.847717	1	0.792212	0.773903	0.799008	1	0.803743	0.915517	0.934832	0.957931	RpS6	0.88368	18C	1.29215	1.24418	1.24418
CG10946-RA	1	1	24	3	CG10946-RA	1	0.710052	0.247785	0.6496	0.398933	0.30703	0.725927	1	0.387459	0.5913	0.789567	0.669106	dpr14	0.623063	18C	4.03575	2.58092	2.58092
CG10947-RA	0.772187	1	24	17	CG10947-RA	0.807124	1	0.865958	0.813212	0.998821	0.38436	0.612933	0.746449	0.796901	0.998522	1	0.753274	CG10947	0.814796	18C	2.60173	1.33968	1.33968
CG10947-RB	0.772187	1	24	17	CG10947-RB	0.807124	1	0.865958	0.813212	0.998821	0.38436	0.612933	0.746449	0.796901	0.998522	1	0.753274	CG10947	0.814796	18C	2.60173	1.33968	1.33968
CG10948-RB	1	1	24	3	CG10948-RB	0.308559	0.693794	0.564928	0.507782	0.389799	1	0.625754	0.887952	1	0.317791	0.946125	0.732058	CG10948	0.664545	18C	3.24087	3.14672	3.14672
CG10948-RC	1	1	24	3	CG10948-RC	0.308559	0.693794	0.564928	0.507782	0.389799	1	0.625754	0.887952	1	0.317791	0.946125	0.732058	CG10948	0.664545	18C	3.24087	3.14672	3.14672
CG10948-RD	1	1	24	3	CG10948-RD	0.308559	0.693794	0.564928	0.507782	0.389799	1	0.625754	0.887952	1	0.317791	0.946125	0.732058	CG10948	0.664545	18C	3.24087	3.14672	3.14672
CG10949-RA	1	1	24	21	CG10949-RA	0.405107	0.43474	0.317869	1	0.191913	0.78774	0.157807	0.138623	0.712702	0.545734	0.629352	1	CG10949	0.526799	18C	6.33686	7.21379	6.33686
CG10954-RA	1	1	24	9	CG10954-RA	1	0.878958	0.732343	0.548551	0.694808	0.907443	0.549566	1	0.910067	0.99963	0.872219	0.597004	Arpc2	0.807549	18C	1.82298	1.67503	1.67503
CG10959-RA	0.576952	1	24	23	CG10959-RA	0.270072	0.496845	0.105956	1	0.255884	0.78774	0.334327	0.110132	0.301984	0.236492	1	0.953362	CG10959	0.487733	18C	9.43785	9.08003	9.08003
CG10960-RA	1	1	24	3	CG10960-RA	0.333094	0.603906	1	0.44091	0.548862	0.647709	0.927319	0.546633	0.573101	0.590743	0.465757	1	CG10960	0.639836	18C	3.00215	2.14704	2.14704
CG10960-RB	1	1	24	3	CG10960-RB	0.333094	0.603906	1	0.44091	0.548862	0.647709	0.927319	0.546633	0.573101	0.590743	0.465757	1	CG10960	0.639836	18C	3.00215	2.14704	2.14704
CG10960-RC	1	1	24	3	CG10960-RC	0.333094	0.603906	1	0.44091	0.548862	0.647709	0.927319	0.546633	0.573101	0.590743	0.465757	1	CG10960	0.639836	18C	3.00215	2.14704	2.14704
CG10961-RA	0.353312	1	24	23	CG10961-RA	0.453763	0.667823	0.617148	0.771629	0.745204	1	0.862433	0.701176	0.944745	0.934555	0.956573	1	Traf6	0.804587	18C	2.20379	1.42618	1.42618
CG10962-RB	0.0363147	1	24	21	CG10962-RB	0.752495	0.37755	0.720806	0.804121	1	0.931154	0.313488	0.539091	0.43434	0.571292	0.794636	1	CG10962	0.686581	18C	3.18991	2.30234	2.30234
CG10964-RA	1	1	24	21	CG10964-RA	0.932059	0.820407	1	0.933873	0.720893	0.961686	0.930546	0.909715	0.735942	0.950451	0.98214	1	sni	0.906476	18C	1.38717	1.3588	1.3588
CG10967-RA	0.576952	1	24	21	CG10967-RA	0.566421	0.738107	1	0.903004	0.603748	0.963741	0.484198	0.212668	0.492025	0.780152	1	0.792642	Atg1	0.711392	18C	2.06527	4.70216	2.06527
CG10971-RA	1	1	24	9	CG10971-RA	0.686619	1	0.808136	0.423726	0.487911	0.500679	0.623688	0.575264	0.478849	1	0.479701	0.592833	Hip1	0.638117	18C	2.36001	2.08834	2.08834
CG10971-RB	1	1	24	9	CG10971-RB	0.686619	1	0.808136	0.423726	0.487911	0.500679	0.623688	0.575264	0.478849	1	0.479701	0.592833	Hip1	0.638117	18C	2.36001	2.08834	2.08834
CG10973-RB	1	1	24	3	CG10973-RB	0.485695	0.630722	0.269013	0.352626	0.162416	1	0.422697	0.556969	0.865424	0.823917	0.433482	1	CG10973	0.58358	18C	6.15702	2.3069	2.3069
CG10978-RA	1	1	24	1	CG10978-RA	1	0.272545	0.435919	0.457126	0.842192	0.432116	1	0.709506	0.792906	0.559066	0.692184	0.49892	jagn	0.64104	18C	3.66912	2.00433	2.00433
CG10978-RB	1	1	24	1	CG10978-RB	0.578548	0.473042	0.59267	0.674397	0.639514	1	1	0.709506	0.792906	0.559066	0.692184	0.49892	jagn	0.684229	18C	2.11398	2.00433	2.00433
CG10979-RA	0.141715	1	24	1	CG10979-RA	0.719971	0.599186	0.484224	0.634727	0.877048	1	1	0.726055	0.258074	0.50045	0.348815	0.620754	CG10979	0.647442	18C	2.06516	3.87486	2.06516
CG1098-RA	0.880418	1	24	23	CG1098-RA	0.989482	0.627002	0.54348	0.759894	1	0.897899	0.489366	0.675747	0.575773	0.664221	1	0.537056	Madm	0.729993	18C	2.04346	1.862	1.862
CG10981-RA	1	1	24	15	CG10981-RA	0.10192	1	0	0.587037	0.965657	0.198186	0.643579	0.385461	0.951249	0.275907	1	0.370752	dgrn	0.539979	18C	Inf	3.62441	3.62441
CG10981-RB	1	1	24	15	CG10981-RB	0.10192	1	0	0.587037	0.965657	0.198186	0.643579	0.385461	0.951249	0.275907	1	0.370752	dgrn	0.539979	18C	Inf	3.62441	3.62441
CG10984-RA	0.576952	1	24	3	CG10984-RA	0.599976	0.560642	0.246596	0.329118	0.108277	1	0.631878	0.585901	0.528471	0.419379	1	0.385582	CG10984	0.532985	18C	9.23553	2.59348	2.59348
CG10984-RB	0.576952	1	24	3	CG10984-RB	0.599976	0.560642	0.246596	0.329118	0.108277	1	0.631878	0.585901	0.528471	0.419379	1	0.385582	CG10984	0.532985	18C	9.23553	2.59348	2.59348
CG10984-RC	0.576952	1	24	3	CG10984-RC	0.599976	0.560642	0.246596	0.329118	0.108277	1	0.631878	0.585901	0.528471	0.419379	1	0.385582	CG10984	0.532985	18C	9.23553	2.59348	2.59348
CG10986-RB	1	1	24	1	CG10986-RB	0.962319	0.799517	0.633299	0.919536	1	0.543266	0.768952	0.837002	0.513372	0.536048	1	0.50846	g	0.751814	18C	1.84072	1.96672	1.84072
CG10988-RA	1	1	24	15	CG10988-RA	0.811012	0.355239	1	0.571991	0.329317	0.337935	0.447408	0.725575	0.683904	0.649194	1	0.523415	Grip91	0.619582	18C	3.03659	1.91053	1.91053
CG1099-RA	1	1	24	15	CG1099-RA	0.257133	0.420481	0.538027	0.423151	0.324832	1	0.369034	0.138931	1	0.397779	0.810964	0.400889	Dap160	0.506769	18C	3.88904	7.1978	3.88904
CG1099-RB	1	1	24	15	CG1099-RB	0.257133	0.420481	0.538027	0.423151	0.324832	1	0.369034	0.138931	1	0.397779	0.810964	0.400889	Dap160	0.506769	18C	3.88904	7.1978	3.88904
CG10990-RA	1	1	24	1	CG10990-RA	1	0.629364	0.836275	0.562987	0.872666	0.665231	0.834703	0.765783	0.887832	0.739432	1	0.830484	Pdcd4	0.802063	18C	1.77624	1.35239	1.35239
CG10990-RB	0.300911	1	24	1	CG10990-RB	0.959035	0.630722	0.763416	0.56039	0.790133	1	0.823001	0.770923	0.873739	0.724717	1	0.830484	Pdcd4	0.810547	18C	1.78447	1.37985	1.37985
CG10992-RA	0.576952	1	24	15	CG10992-RA	0.762237	1	0.893664	0.894754	0.89073	0.79509	0.791095	0.692094	1	0.807965	0.923773	0.791009	CtsB1	0.853534	18C	1.31193	1.44489	1.31193
CG10997-RA	1	1	24	21	CG10997-RA	0.571701	0.970842	0.845413	0.796079	1	0.940656	0.942458	0.433198	0.534527	0.847542	0.449537	1	Clic	0.777663	18C	1.74917	2.30841	1.74917
CG10999-RA	0.170207	1	24	11	CG10999-RA	0.740958	0.98145	1	0.829165	0.786276	0.518691	0.706945	0.386664	1	0.239027	0.353372	0.321194	CG42675	0.655312	18C	1.92793	4.18363	1.92793
CG10999-RB	0.170207	1	24	11	CG10999-RB	0.740958	0.98145	1	0.829165	0.786276	0.518691	0.706945	0.386664	1	0.239027	0.353372	0.321194	CG42675	0.655312	18C	1.92793	4.18363	1.92793
CG10999-RC	0.170207	1	24	11	CG10999-RC	0.740958	0.98145	1	0.829165	0.786276	0.518691	0.706945	0.386664	1	0.239027	0.353372	0.321194	CG42675	0.655312	18C	1.92793	4.18363	1.92793
CG1100-RA	1	1	24	9	CG1100-RA	0.572648	1	0.598115	0.508636	0.639579	0.567825	0.581698	0.532963	1	0.56633	0.662822	0.568115	Rpn5	0.649894	18C	1.96604	1.8763	1.8763
CG11001-RA	1	1	24	3	CG11001-RA	0.763079	0.907195	0.820131	0.814322	1	0.75044	0.71131	1	0.723792	0.70045	0.687775	0.922836	FK506-bp2	0.816778	18C	1.40586	1.45396	1.40586
CG11006-RA	1	1	24	9	CG11006-RA	1	0.39563	0.35436	0.451228	0.489015	0.125453	0.549566	1	0.709143	0.567691	0.68212	0.464336	Sap130	0.565712	18C	7.97111	2.15361	2.15361
CG11006-RB	1	1	24	9	CG11006-RB	1	0.39563	0.35436	0.451228	0.489015	0.125453	0.549566	1	0.709143	0.567691	0.68212	0.464336	Sap130	0.565712	18C	7.97111	2.15361	2.15361
CG11006-RC	1	1	24	9	CG11006-RC	1	0.39563	0.35436	0.451228	0.489015	0.125453	0.549566	1	0.709143	0.567691	0.68212	0.464336	Sap130	0.565712	18C	7.97111	2.15361	2.15361
CG11006-RE	1	1	24	9	CG11006-RE	1	0.39563	0.35436	0.451228	0.489015	0.125453	0.549566	1	0.709143	0.567691	0.68212	0.464336	Sap130	0.565712	18C	7.97111	2.15361	2.15361
CG11007-RA	0.421631	1	24	5	CG11007-RA	0.974397	0.697114	0.594661	0.690405	0.153868	1	1	0.8874	0.700486	0.90466	0.418577	0.594889	CG11007	0.718038	18C	6.49908	2.38904	2.38904
CG11009-RA	0.113223	1	24	1	CG11009-RA	0.966819	0.870396	0.59721	0.846303	0.701638	1	0.92054	0.714776	0.816638	0.635656	0.407393	1	Wbp2	0.789781	18C	1.67445	2.45463	1.67445
CG11009-RB	0.113223	1	24	1	CG11009-RB	0.966819	0.870396	0.59721	0.846303	0.701638	1	0.92054	0.714776	0.816638	0.635656	0.407393	1	Wbp2	0.789781	18C	1.67445	2.45463	1.67445
CG11009-RC	0.113223	1	24	1	CG11009-RC	0.966819	0.870396	0.59721	0.846303	0.701638	1	0.92054	0.714776	0.816638	0.635656	0.407393	1	Wbp2	0.789781	18C	1.67445	2.45463	1.67445
CG1101-RA	1	1	24	21	CG1101-RA	0.514265	0.578162	0.627698	0.528939	0.86622	1	0.738068	0.881346	1	0.935403	0.886992	0.721043	Ref1	0.773178	18C	1.94452	1.38688	1.38688
CG11010-RA	0.0592039	1	24	1	CG11010-RA	0.642832	0.946083	0.235387	0.599464	0.649665	1	1	0.817855	0.373762	0.406533	0.515704	0.786645	Ent3	0.664494	18C	4.24833	2.6755	2.6755
CG11015-RA	0.170207	1	24	21	CG11015-RA	0.85696	0.791164	0.831868	0.924187	1	0.925085	0.785434	0.843519	0.690164	0.755172	1	0.840806	CoVb	0.853696	18C	1.27318	1.44893	1.27318
CG1102-RA	0.772187	1	24	19	CG1102-RA	0.738432	0.812661	0.812213	0.960228	0.762107	1	0.794446	0.675524	0.805963	0.823108	1	0.684465	MP1	0.822429	18C	1.35422	1.48033	1.35422
CG1102-RB	0.772187	1	24	19	CG1102-RB	0.738432	0.812661	0.812213	0.960228	0.762107	1	0.794446	0.675524	0.805963	0.823108	1	0.684465	MP1	0.822429	18C	1.35422	1.48033	1.35422
CG11024-RA	1	1	24	9	CG11024-RA	0.969432	0.993218	1	0.871605	0.667595	0.643686	0.769481	0.74414	0.806205	0.81795	0.784396	1	cl	0.838976	18C	1.55355	1.34383	1.34383
CG11025-RA	1	1	24	13	CG11025-RA	0.972258	0.372634	0.667525	1	0.690886	0.236322	0.397532	1	0.522289	0.54536	0.648573	0.183207	isopeptidase-T-3	0.603049	18C	4.23151	5.45829	4.23151
CG11025-RB	1	1	24	13	CG11025-RB	0.972258	0.372634	0.667525	1	0.690886	0.236322	0.397532	1	0.522289	0.54536	0.648573	0.183207	isopeptidase-T-3	0.603049	18C	4.23151	5.45829	4.23151
CG11027-RA	1	1	24	9	CG11027-RA	0.958665	1	0.775484	0.80508	0.786571	0.903246	0.855584	0.933177	0.976186	1	0.95508	0.809366	Arf102F	0.896537	18C	1.28952	1.23553	1.23553
CG1103-RA	1	1	24	19	CG1103-RA	0.420831	1	0.577861	0.346271	0.897126	0.306868	0.422042	0.749533	0.530383	0.848022	0.642942	1	CG1103	0.645157	18C	3.25873	1.88543	1.88543
CG1103-RB	1	1	24	19	CG1103-RB	0.420831	1	0.577861	0.346271	0.897126	0.306868	0.422042	0.749533	0.530383	0.848022	0.642942	1	CG1103	0.645157	18C	3.25873	1.88543	1.88543
CG11030-RA	0.421631	1	24	15	CG11030-RA	0.520852	0.532334	0.13623	1	0.98698	0.675206	0.484357	0.273521	1	0.848389	0.946125	0.0876944	CG11030	0.624307	18C	7.34055	11.4032	7.34055
CG11033-RA	0.0592039	1	24	15	CG11033-RA	0.662903	0.711392	0.866915	1	0.628078	0.537096	0.447021	0.814233	0.831303	0.75642	1	0.449901	Kdm2	0.725439	18C	2.23703	2.22271	2.22271
CG11035-RA	0.576952	1	24	15	CG11035-RA	0.937094	0.689581	1	0.956122	0.85235	0.437328	0.736757	0.556778	0.802494	0.858378	1	0.343289	CG11035	0.764181	18C	2.28661	2.913	2.28661
CG1104-RA	0.0931041	1	24	13	CG1104-RA	1	0.70521	0.863119	0.822827	0.852719	0.583357	0.68497	0.734637	1	0.788762	0.667052	0.595565	CG1104	0.774851	18C	1.71422	1.67908	1.67908
CG11044-RA	0.300911	1	24	13	CG11044-RA	0.452224	0.378157	1	0.473584	0.077903	0.239825	0.30357	1	0.900949	0.920294	0.55592	0.49466	CG11044	0.566424	18C	12.8365	2.02159	2.02159
CG11049-RA	1	1	24	3	CG11049-RA	0.326144	1	0.51182	0.80508	0	0.634194	0.789034	0.519837	0.846334	0.186046	0.885026	1	sv	0.625293	18C	Inf	5.37502	5.37502
CG11049-RC	1	1	24	3	CG11049-RC	0.326144	1	0.51182	0.80508	0	0.634194	0.789034	0.519837	0.846334	0.186046	0.885026	1	sv	0.625293	18C	Inf	5.37502	5.37502
CG11049-RD	1	1	24	3	CG11049-RD	0.326144	1	0.51182	0.80508	0	0.634194	0.789034	0.519837	0.846334	0.186046	0.885026	1	sv	0.625293	18C	Inf	5.37502	5.37502
CG11049-RH	1	1	24	3	CG11049-RH	0.326144	1	0.51182	0.80508	0	0.634194	0.789034	0.519837	0.846334	0.186046	0.885026	1	sv	0.625293	18C	Inf	5.37502	5.37502
CG1105-RA	0.300911	1	24	1	CG1105-RA	0.914721	0.668802	0.579712	0.492122	1	0.820936	0.373753	0.547197	0.337596	0.365564	0.508686	1	CG1105	0.634091	18C	2.67556	2.96212	2.67556
CG11050-RA	0.0729854	1	24	1	CG11050-RA	0.873055	0.696728	0.722582	0.80694	0.759202	1	0.867938	0.987691	0.72566	0.838897	0.986938	1	CG11050	0.855469	18C	1.43528	1.37806	1.37806
CG11050-RB	0.0729854	1	24	1	CG11050-RB	0.873055	0.696728	0.722582	0.80694	0.759202	1	0.867938	0.987691	0.72566	0.838897	0.986938	1	CG11050	0.855469	18C	1.43528	1.37806	1.37806
CG11050-RC	0.0729854	1	24	1	CG11050-RC	0.873055	0.696728	0.722582	0.80694	0.759202	1	0.867938	0.987691	0.72566	0.838897	0.986938	1	CG11050	0.855469	18C	1.43528	1.37806	1.37806
CG11051-RA	0.353312	1	24	1	CG11051-RA	0.967117	0.816112	0.888022	0.905207	0.833603	1	0.674942	0.992024	0.56161	0.689634	0.901412	1	Nplp2	0.852474	18C	1.48161	1.7806	1.48161
CG11055-RA	1	1	24	21	CG11055-RA	0.685687	0.735842	0.979977	0.725402	0.464046	1	0.348103	0.611573	0.80703	0.722295	0.981709	1	Hsl	0.755139	18C	2.87271	1.63513	1.63513
CG11055-RB	1	1	24	21	CG11055-RB	0.685687	0.735842	0.979977	0.725402	0.464046	1	0.348103	0.611573	0.80703	0.722295	0.981709	1	Hsl	0.755139	18C	2.87271	1.63513	1.63513
CG11055-RC	1	1	24	21	CG11055-RC	0.685687	0.735842	0.979977	0.725402	0.464046	1	0.348103	0.611573	0.80703	0.722295	0.981709	1	Hsl	0.755139	18C	2.87271	1.63513	1.63513
CG11059-RA	1	1	24	13	CG11059-RA	1	0.843186	0.865426	0.937781	0.877799	0.957963	0.795202	0.83069	0.936128	1	0.734677	0.768725	Cals	0.878965	18C	1.25754	1.36114	1.25754
CG11059-RB	1	1	24	13	CG11059-RB	1	0.843186	0.865426	0.937781	0.877799	0.957963	0.79759	0.83069	0.936128	1	0.734677	0.768725	Cals	0.879164	18C	1.25378	1.36114	1.25378
CG1106-RA	1	1	24	3	CG1106-RA	0.891996	1	0.924667	0.9221	0.723722	0.869696	0.694323	0.795468	0.606843	0.728117	0.729042	1	Gel	0.823831	18C	1.44025	1.64787	1.44025
CG1106-RB	1	1	24	3	CG1106-RB	0.891996	1	0.924667	0.9221	0.723722	0.869696	0.694323	0.795468	0.606843	0.728117	0.729042	1	Gel	0.823831	18C	1.44025	1.64787	1.44025
CG1106-RD	1	1	24	3	CG1106-RD	0.891996	1	0.924667	0.9221	0.723722	0.869696	0.694323	0.795468	0.606843	0.728117	0.729042	1	Gel	0.823831	18C	1.44025	1.64787	1.44025
CG1106-RF	1	1	24	3	CG1106-RF	0.891996	1	0.924667	0.9221	0.723722	0.869696	0.694323	0.795468	0.606843	0.728117	0.729042	1	Gel	0.823831	18C	1.44025	1.64787	1.44025
CG1106-RH	1	1	24	3	CG1106-RH	0.891996	1	0.924667	0.9221	0.723722	0.869696	0.694323	0.795468	0.606843	0.728117	0.729042	1	Gel	0.823831	18C	1.44025	1.64787	1.44025
CG11061-RA	0.880418	1	24	19	CG11061-RA	0.659654	0.202259	0.15528	0.434225	1	0.128271	0.835817	0.220264	0.905951	0.630645	1	0.423717	GM130	0.549674	18C	7.79598	4.54001	4.54001
CG11061-RB	0.880418	1	24	19	CG11061-RB	0.659654	0.202259	0.15528	0.434225	1	0.128271	0.835817	0.220264	0.905951	0.630645	1	0.423717	GM130	0.549674	18C	7.79598	4.54001	4.54001
CG11062-RA	0.353312	1	24	5	CG11062-RA	1	0.794923	0.842776	0.548551	0.842192	0.720193	1	0.545236	0.747524	0.455317	0.648314	0.742942	Actbeta	0.740664	18C	1.82298	2.19627	1.82298
CG11063-RB	0.209359	1	24	19	CG11063-RB	0.792602	0.388835	0.414612	1	0.700899	0.513744	0.140899	0.334181	0.407258	0.983385	0.698388	1	jub	0.614567	18C	7.09728	2.99239	2.99239
CG11064-RA	0.880418	1	24	1	CG11064-RA	0.945043	0.770853	0.955954	0.943326	0.838312	1	0.559388	0.977486	0.443758	0.725661	0.81624	1	Rfabg	0.831335	18C	1.78767	2.25348	1.78767
CG11066-RA	0.663955	1	24	9	CG11066-RA	0.971492	1	0.898407	0.999213	0.657468	0.809609	0.393516	1	0.495087	0.576604	0.336297	0.63232	scaf	0.730834	18C	2.54119	2.97356	2.54119
CG11066-RB	0.663955	1	24	9	CG11066-RB	0.971492	1	0.898407	0.999213	0.657468	0.809609	0.393516	1	0.495087	0.576604	0.336297	0.63232	scaf	0.730834	18C	2.54119	2.97356	2.54119
CG11069-RA	1	1	24	1	CG11069-RA	0.642832	0.157681	0.20176	0.105788	0.974497	1	0.648991	0.452724	1	0.648106	0.358875	0.435448	CG11069	0.552225	18C	9.45288	2.78649	2.78649
CG1107-RA	0.663955	1	24	1	CG1107-RA	0.72216	0.69111	0.583816	0.630225	0.601286	1	0.7458	0.541201	0.976304	0.978652	0.646594	1	aux	0.759762	18C	1.71287	1.84774	1.71287
CG1107-RB	0.663955	1	24	1	CG1107-RB	0.72216	0.69111	0.583816	0.630225	0.601286	1	0.7458	0.541201	0.976304	0.978652	0.646594	1	aux	0.759762	18C	1.71287	1.84774	1.71287
CG11070-RA	1	1	24	9	CG11070-RA	0.617118	0.378433	0.847392	0.465466	0.389799	1	0.963881	0.762038	0.761805	1	0.535424	0.305399	CG11070	0.668896	18C	2.64247	3.27441	2.64247
CG11073-RA	0.421631	1	24	11	CG11073-RA	0.876448	0.955486	1	0.839617	0.858486	0.699822	0.823558	1	0.949161	0.888831	0.898024	0.95127	CG11073	0.895058	18C	1.42894	1.12507	1.12507
CG11076-RA	0.0214013	1	24	19	CG11076-RA	0.759577	0.584358	0.79106	1	0.654248	0.805643	0.539482	0.360432	0.768686	0.816972	1	0.780024	CG11076	0.738373	18C	1.85363	2.77445	1.85363
CG11076-RB	0.0214013	1	24	19	CG11076-RB	0.759577	0.584358	0.79106	1	0.654248	0.805643	0.539482	0.360432	0.768686	0.816972	1	0.780024	CG11076	0.738373	18C	1.85363	2.77445	1.85363
CG11077-RA	0.421631	1	24	17	CG11077-RA	0.781619	0.923547	0.897512	1	0.966337	0.574587	0.852924	0.719775	0.836776	0.937008	0.939113	1	CG11077	0.8691	18C	1.74038	1.38932	1.38932
CG11081-RA	1	1	24	15	CG11081-RA	0.659654	0.0809035	0.31056	0.86845	1	0	1	0.279503	0.985373	0.628771	0.310762	0.422457	PlexA	0.545536	18C	Inf	3.57779	3.57779
CG11081-RC	1	1	24	13	CG11081-RC	0.560918	0.802596	0.733544	1	0.531451	0.545359	1	0.288237	0.762125	0.64842	0.320473	0.435659	PlexA	0.635732	18C	1.88164	3.46937	1.88164
CG11084-RA	0.141715	1	24	13	CG11084-RA	0.509779	0.62522	1	0.62919	0.965997	0	0.771105	0.254013	0.783571	1	0.906101	0.12216	pk	0.630595	18C	Inf	8.18601	8.18601
CG11084-RB	0.141715	1	24	13	CG11084-RB	0.509779	0.62522	1	0.62919	0.965997	0	0.771105	0.254013	0.783571	1	0.906101	0.12216	pk	0.630595	18C	Inf	8.18601	8.18601
CG11084-RC	0.141715	1	24	13	CG11084-RC	0.509779	0.62522	1	0.62919	0.965997	0	0.771105	0.254013	0.783571	1	0.906101	0.12216	pk	0.630595	18C	Inf	8.18601	8.18601
CG11085-RA	0.772187	1	24	3	CG11085-RA	0.514265	0.157681	0.30264	0.211576	0.243624	1	1	0.564709	0.645185	0.134737	0.48834	0.181053	CG11085	0.453651	18C	6.34194	7.42188	6.34194
CG11086-RA	1	1	24	9	CG11086-RA	0.82928	0.600997	0.41408	0.620322	1	0.293191	0.242856	1	0.603244	0.143157	0.337258	0.346262	Gadd45	0.535887	18C	4.11767	6.98534	4.11767
CG11089-RA	0.0120563	1	24	1	CG11089-RA	1	0.847879	0.644537	0.650705	0.957134	0.972261	0.983151	0.936627	0.624403	0.663838	0.50006	1	CG11089	0.815049	18C	1.5515	1.99976	1.5515
CG1109-RA	0.0120563	1	24	17	CG1109-RA	0.464682	0.701428	0.61704	1	0.745073	0.486545	0.307933	0.608623	0.750986	0.929372	1	0.858584	CG1109	0.705855	18C	3.24746	1.64305	1.64305
CG1109-RB	0.0120563	1	24	17	CG1109-RB	0.464682	0.701428	0.61704	1	0.745073	0.486545	0.307933	0.608623	0.750986	0.929372	1	0.858584	CG1109	0.705855	18C	3.24746	1.64305	1.64305
CG11092-RA	1	1	24	21	CG11092-RA	0.514265	0.56765	0.322816	0.169261	0.194899	1	0.0390048	0.205579	0.775091	0.478239	1	0.346035	Nup93-1	0.467737	18C	25.6379	4.8643	4.8643
CG11094-RB	0.576952	1	24	17	CG11094-RB	0.781279	0.399251	0.510861	1	0.49349	0.422004	0.23671	0.41587	0.665189	0.595346	0.764213	1	dsx	0.607018	18C	4.22457	2.4046	2.4046
CG11094-RC	0.576952	1	24	17	CG11094-RC	0.781279	0.399251	0.510861	1	0.49349	0.422004	0.23671	0.41587	0.665189	0.595346	0.764213	1	dsx	0.607018	18C	4.22457	2.4046	2.4046
CG11095-RA	1	1	24	21	CG11095-RA	0.694258	0.867243	0.887744	0.740515	0.779598	1	0.311844	0.862895	0.676022	1	0.826151	0.869489	CG11095	0.79298	18C	3.20673	1.47924	1.47924
CG11098-RA	1	1	24	15	CG11098-RA	0.84483	1	0.924975	0.953809	0.819063	0.840498	0.649064	0.72274	0.635817	0.870832	1	0.660402	Tango1	0.826836	18C	1.54068	1.57278	1.54068
CG11098-RB	1	1	24	15	CG11098-RB	0.84483	1	0.924975	0.953809	0.819063	0.840498	0.649064	0.72274	0.635817	0.870832	1	0.660402	Tango1	0.826836	18C	1.54068	1.57278	1.54068
CG11099-RA	1	1	24	21	CG11099-RA	0.839151	0.612184	0.624385	1	0.603154	0.928408	0.698859	0.631231	0.514164	0.685711	0.505729	1	CG11099	0.720248	18C	1.65795	1.97734	1.65795
CG11100-RB	1	1	24	13	CG11100-RB	0.331452	0.542013	0.606841	1	0.628078	0.214838	0.370637	1	0.15942	0.349569	0.407244	0.380262	Mes2	0.499196	18C	4.65466	6.27275	4.65466
CG11100-RC	1	1	24	13	CG11100-RC	0.331452	0.542013	0.606841	1	0.628078	0.214838	0.370637	1	0.15942	0.349569	0.407244	0.380262	Mes2	0.499196	18C	4.65466	6.27275	4.65466
CG11103-RB	0.421631	1	24	5	CG11103-RB	0.599976	0.473042	0.40352	0.282101	0.812081	1	0.69568	1	0.933048	0.298243	0.39635	0.614508	CG11103	0.625713	18C	3.54483	3.35297	3.35297
CG11105-RB	0.209359	1	24	9	CG11105-RB	0.810215	0.745268	0.635738	1	0	0.39387	0.271044	1	0.195859	0.562402	0.13898	0.0687028	CG44422	0.485173	18C	Inf	14.5554	14.5554
CG11107-RA	1	1	24	1	CG11107-RA	0.911523	0.588389	0.865804	0.86845	1	0.466441	0.962889	0.493405	0.591905	0.529757	0.30858	1	CG11107	0.715595	18C	2.14389	3.24065	2.14389
CG11109-RA	0.772187	1	24	1	CG11109-RA	0.555498	0.868648	0.501255	0.502787	1	0.594098	1	0.279033	0.382557	0.621374	0.422271	0.790244	CG11109	0.62648	18C	1.99499	3.58381	1.99499
CG11109-RB	0.772187	1	24	1	CG11109-RB	0.555498	0.868648	0.501255	0.502787	1	0.594098	1	0.279033	0.382557	0.621374	0.422271	0.790244	CG11109	0.62648	18C	1.99499	3.58381	1.99499
CG11110-RA	0.141715	1	24	17	CG11110-RA	0.52664	0.869479	0.603951	1	0.614121	0.551418	0.521565	0.299567	0.579825	0.744183	0.674305	1	CG11110	0.665421	18C	1.91731	3.33815	1.91731
CG11115-RA	1	1	24	15	CG11115-RA	0.703631	0.927693	0.855765	0.69476	1	0.205234	0.651237	0.371846	1	0.593744	0.556544	0.880383	Ssl1	0.703403	18C	4.87249	2.68929	2.68929
CG1112-RA	0.880418	1	24	1	CG1112-RA	0.855958	0.696334	0.828705	0.715665	0.758669	1	0.695869	0.798878	0.548929	0.787442	0.723914	1	alpha-Est7	0.784197	18C	1.43705	1.82173	1.43705
CG1112-RB	0.880418	1	24	1	CG1112-RB	0.855958	0.696334	0.828705	0.715665	0.758669	1	0.695869	0.798878	0.548929	0.787442	0.723914	1	alpha-Est7	0.784197	18C	1.43705	1.82173	1.43705
CG11120-RA	0.113223	1	24	7	CG11120-RA	1	0.858517	0.470792	0.164565	0	0.194452	1	0.368943	0.397434	0.150905	0.44439	0.152085	Mink	0.433507	18C	Inf	6.62668	6.62668
CG11121-RA	0.141715	1	24	7	CG11121-RA	0.87808	1	0.738202	0.6709	0.2377	0.731762	1	0.590673	0.747524	0.845589	0.294688	0.611835	so	0.695579	18C	4.20698	3.39342	3.39342
CG11122-RA	1	1	24	1	CG11122-RA	1	0.636812	0.573401	0.696238	0.437292	0.972261	0.91714	0.583401	0.657019	0.715868	1	0.601219	CG11122	0.732554	18C	2.2868	1.71409	1.71409
CG11123-RA	1	1	24	3	CG11123-RA	0.733824	1	0.575797	0.87217	0.463515	0.951291	0.69568	1	0.628379	0.715784	0.83774	0.921763	CG11123	0.782995	18C	2.15743	1.5914	1.5914
CG11124-RA	0.209359	1	24	23	CG11124-RA	0.872322	0.810187	0.780828	1	0.786374	0.856359	0.674554	0.652117	0.644295	0.852156	0.939211	1	sPLA2	0.822367	18C	1.48246	1.55208	1.48246
CG11124-RB	0.209359	1	24	23	CG11124-RB	0.865073	0.804786	0.778117	1	0.783644	0.853385	0.674554	0.652117	0.644295	0.852156	0.939211	1	sPLA2	0.820612	18C	1.48246	1.55208	1.48246
CG11124-RC	0.141715	1	24	21	CG11124-RC	0.888474	0.793258	0.801897	1	0.846161	0.904111	0.674554	0.652117	0.644295	0.852156	0.939211	1	sPLA2	0.83302	18C	1.48246	1.55208	1.48246
CG11127-RA	1	1	24	15	CG11127-RA	0.843093	1	0.870442	0.903661	0.924928	0.690279	0.751583	0.733903	0.697058	1	0.762731	0.773935	CG11127	0.829301	18C	1.44869	1.4346	1.4346
CG11128-RA	0.170207	1	24	13	CG11128-RA	0.364128	0.93783	1	0.719074	0.620998	0.566444	0.51745	0.998946	1	0.646932	0.69931	0.991328	slif	0.755203	18C	2.74629	1.54576	1.54576
CG11128-RB	0.170207	1	24	13	CG11128-RB	0.364128	0.93783	1	0.719074	0.620998	0.566444	0.51745	0.998946	1	0.646932	0.69931	0.991328	slif	0.755203	18C	2.74629	1.54576	1.54576
CG11128-RC	0.170207	1	24	13	CG11128-RC	0.364128	0.93783	1	0.719074	0.620998	0.566444	0.51745	0.998946	1	0.646932	0.69931	0.991328	slif	0.755203	18C	2.74629	1.54576	1.54576
CG11129-RA	1	1	24	21	CG11129-RA	0.902414	0.612044	0.937058	1	0.903463	0.835603	0.452028	0.989908	0.380699	0.606811	0.950783	1	Yp3	0.797568	18C	2.21225	2.62675	2.21225
CG1113-RA	1	1	24	3	CG1113-RA	0.374011	0.143346	0.256785	0.115405	0	1	0.963881	0.381019	0.783571	1	0.411864	0.366479	CG1113	0.48303	18C	Inf	2.72867	2.72867
CG11130-RA	1	1	24	21	CG11130-RA	0	0.630722	0.30264	0.105788	0.730873	1	0.329049	0.0963496	0.16512	1	0.437428	0.278018	Rtc1	0.422999	18C	Inf	10.3789	10.3789
CG11132-RA	1	1	24	13	CG11132-RA	0.656265	1	0.811422	0.998168	0.90442	0.580055	0.746091	0.887952	1	0.556135	0.791865	0.945575	DMAP1	0.823162	18C	1.72397	1.79813	1.72397
CG11134-RA	1	1	24	21	CG11134-RA	0.682627	1	0.704248	0.925738	0.479085	0.786597	0.638913	0.605387	0.531714	0.839571	1	0.973508	CG11134	0.763949	18C	2.08731	1.88071	1.88071
CG11136-RA	0.141715	1	24	3	CG11136-RA	0.925678	0.819939	0.645632	0.338521	0.194899	1	1	0.208051	0.522939	0.347479	0.809617	0.600334	Lrt	0.617757	18C	5.13085	4.80652	4.80652
CG11137-RA	1	1	24	3	CG11137-RA	0.865426	1	0.836197	0.885705	0.914833	0.917912	0.913508	0.764467	0.827039	0.917295	0.697744	1	CG11137	0.878344	18C	1.19589	1.43319	1.19589
CG11138-RC	1	1	24	13	CG11138-RC	0.405107	0.828075	0.105956	1	0	0.52516	1	0.513372	0.774222	0.71043	0.677017	0.460863	CG11138	0.58335	18C	Inf	2.16984	2.16984
CG11138-RD	1	1	24	13	CG11138-RD	0.405107	0.828075	0.105956	1	0	0.52516	1	0.513372	0.774222	0.71043	0.677017	0.460863	CG11138	0.58335	18C	Inf	2.16984	2.16984
CG11139-RA	1	1	24	15	CG11139-RA	0.781982	1	0.673447	0.698364	0.813185	0.574854	0.574562	0.498561	0.924034	0.839287	1	0.568338	p47	0.745551	18C	1.74046	2.00577	1.74046
CG11140-RE	1	1	24	13	CG11140-RE	0.708046	0.973506	0.947395	0.827905	0.692034	1	0.63627	1	0.738591	0.99053	0.853846	0.777244	Aldh-III	0.845447	18C	1.57166	1.35393	1.35393
CG11140-RI	1	1	24	13	CG11140-RI	0.587732	0.801918	0.887744	0.785852	0.584698	1	0.61954	0.978944	0.700643	1	0.84799	0.711776	Aldh-III	0.792236	18C	1.71028	1.42726	1.42726
CG11140-RJ	1	1	24	13	CG11140-RJ	0.708046	0.973506	0.947395	0.827905	0.692034	1	0.63627	1	0.738591	0.99053	0.853846	0.777244	Aldh-III	0.845447	18C	1.57166	1.35393	1.35393
CG11140-RK	1	1	24	13	CG11140-RK	0.587732	0.801918	0.887744	0.785852	0.584698	1	0.63627	1	0.738591	0.99053	0.853846	0.777244	Aldh-III	0.803702	18C	1.71028	1.35393	1.35393
CG11140-RL	1	1	24	13	CG11140-RL	0.587732	0.801918	0.887744	0.785852	0.584698	1	0.61954	0.978944	0.700643	1	0.84799	0.711776	Aldh-III	0.792236	18C	1.71028	1.42726	1.42726
CG11140-RM	1	1	24	13	CG11140-RM	0.587732	0.801918	0.887744	0.785852	0.584698	1	0.63627	1	0.738591	0.99053	0.853846	0.777244	Aldh-III	0.803702	18C	1.71028	1.35393	1.35393
CG11140-RN	1	1	24	13	CG11140-RN	0.587732	0.801918	0.887744	0.785852	0.584698	1	0.63627	1	0.738591	0.99053	0.853846	0.777244	Aldh-III	0.803702	18C	1.71028	1.35393	1.35393
CG11140-RO	1	1	24	13	CG11140-RO	0.587732	0.801918	0.887744	0.785852	0.584698	1	0.63627	1	0.738591	0.99053	0.853846	0.777244	Aldh-III	0.803702	18C	1.71028	1.35393	1.35393
CG11141-RA	1	1	24	9	CG11141-RA	0.316634	0.582505	0.82816	0.260535	1	0.410468	0.69568	1	0.228502	0.536838	0.648573	0.24046	CG11141	0.562363	18C	3.83825	4.37634	3.83825
CG11141-RB	1	1	24	9	CG11141-RB	0.316634	0.582505	0.82816	0.260535	1	0.410468	0.69568	1	0.228502	0.536838	0.648573	0.24046	CG11141	0.562363	18C	3.83825	4.37634	3.83825
CG11142-RA	1	1	24	13	CG11142-RA	0.76114	0.902385	0.93168	0.960306	1	0.82883	0.6351	1	0.786527	0.678112	0.535926	0.632789	obst-E	0.804399	18C	1.57456	1.86593	1.57456
CG11142-RB	1	1	24	1	CG11142-RB	0.765717	0.621846	0.560226	0.638566	1	0.543266	0.933196	1	0.715972	0.858941	0.70142	0.719598	obst-E	0.754896	18C	1.84072	1.42568	1.42568
CG11143-RA	0.0214013	1	24	19	CG11143-RA	0.676146	0.757026	0.82816	0.913036	1	0.838344	0.592449	0.702579	0.825405	0.986318	0.899074	1	Inos	0.834878	18C	1.68791	1.42333	1.42333
CG11147-RA	0.300911	1	24	23	CG11147-RA	0.81755	0.832877	0.600107	0.889703	0.849562	1	0.969905	0.801727	0.647534	1	0.761949	0.916197	CG11147	0.840593	18C	1.66637	1.54432	1.54432
CG11147-RB	0.300911	1	24	23	CG11147-RB	0.81755	0.832877	0.600107	0.889703	0.849562	1	0.969905	0.801727	0.647534	1	0.761949	0.916197	CG11147	0.840593	18C	1.66637	1.54432	1.54432
CG11148-RA	1	1	24	9	CG11148-RA	0.758603	0.950616	0.62112	0.624199	1	0.833763	1	0.699496	0.802897	0.372605	0.56973	0.297285	CG11148	0.710859	18C	1.60999	3.36378	1.60999
CG1115-RA	0.0729854	1	24	5	CG1115-RA	0.78848	1	0.731171	0.516077	0.916843	0.66207	0.965903	1	0.662135	0.544972	0.596982	0.874399	Vps37B	0.771586	18C	1.9377	1.83496	1.83496
CG11151-RA	0.576952	1	24	9	CG11151-RA	0.881681	1	0.751506	0.746336	0.772525	0.568954	1	0.907803	0.979406	0.923965	0.849627	0.80316	CG11151	0.848747	18C	1.75761	1.24508	1.24508
CG11153-RA	1	1	24	9	CG11153-RA	1	0.367936	0.627723	0.164565	0.378986	0	0.46779	0.390377	1	0.764745	0.639634	0.65215	Sox102F	0.537826	18C	Inf	2.56162	2.56162
CG11153-RB	1	1	24	15	CG11153-RB	0.794774	0.774068	0.990458	0.538556	0.885907	1	0.46779	0.390377	1	0.764745	0.639634	0.65215	Sox102F	0.741538	18C	2.13771	2.56162	2.13771
CG11154-RA	0.772187	1	24	1	CG11154-RA	1	0.943866	0.931732	0.94299	0.968558	0.986113	0.742072	0.892127	0.64619	0.739534	1	0.805113	ATPsyn-beta	0.883191	18C	1.34758	1.54753	1.34758
CG11155-RA	1	1	24	3	CG11155-RA	0.713336	0.742624	0.794023	0.600602	0.723014	1	0.935669	0.800458	0.857765	0.849554	0.626567	1	CG11155	0.803634	18C	1.665	1.596	1.596
CG11155-RB	1	1	24	21	CG11155-RB	0.441935	0.542013	0.173383	1	0.837437	0.859353	0.935669	0.800458	0.857765	0.849554	0.626567	1	CG11155	0.743678	18C	5.76758	1.596	1.596
CG11158-RA	0.772187	1	24	23	CG11158-RA	0.961452	0.891238	0.543875	0.423151	0.593172	1	0.54953	0.758165	0.426292	1	0.977927	0.688265	CG11158	0.734422	18C	2.36322	2.34581	2.34581
CG1116-RA	1	1	24	13	CG1116-RA	0.662903	0.880771	0.82357	1	0.942117	0.859353	0.386622	1	0.659637	0.648258	0.379354	0.617029	CG1116	0.738301	18C	2.58651	2.63606	2.58651
CG1116-RB	1	1	24	13	CG1116-RB	0.662903	0.880771	0.82357	1	0.942117	0.859353	0.386622	1	0.659637	0.648258	0.379354	0.617029	CG1116	0.738301	18C	2.58651	2.63606	2.58651
CG1116-RC	0.027207	1	24	9	CG1116-RC	0.85081	1	0.834489	0.991765	0.537409	0.551473	0.386622	1	0.659637	0.648258	0.379354	0.617029	CG1116	0.704737	18C	2.58651	2.63606	2.58651
CG11160-RA	1	1	24	9	CG11160-RA	0.634169	1	0.213258	0.0745444	0.343345	0.176165	0.116758	1	0.369118	0.523073	0.598683	0.295951	CG11160	0.445422	18C	13.4148	3.37894	3.37894
CG11160-RB	1	1	24	9	CG11160-RB	0.634169	1	0.213258	0.0745444	0.343345	0.176165	0.116758	1	0.369118	0.523073	0.598683	0.295951	CG11160	0.445422	18C	13.4148	3.37894	3.37894
CG11163-RA	1	1	24	21	CG11163-RA	0.175908	0.916906	0.345067	0.144742	1	0.684113	0.492046	0.0972519	1	0.788929	0.567675	0.654785	ZnT41F	0.572285	18C	6.90886	10.2826	6.90886
CG11163-RB	1	1	24	21	CG11163-RB	0.175908	0.916906	0.345067	0.144742	1	0.684113	0.492046	0.0972519	1	0.788929	0.567675	0.654785	ZnT41F	0.572285	18C	6.90886	10.2826	6.90886
CG11163-RC	1	1	24	21	CG11163-RC	0.175908	0.916906	0.345067	0.144742	1	0.684113	0.492046	0.0972519	1	0.788929	0.567675	0.654785	ZnT41F	0.572285	18C	6.90886	10.2826	6.90886
CG11163-RD	1	1	24	21	CG11163-RD	0.175908	0.916906	0.345067	0.144742	1	0.684113	0.492046	0.0972519	1	0.788929	0.567675	0.654785	ZnT41F	0.572285	18C	6.90886	10.2826	6.90886
CG11166-RA	1	1	24	13	CG11166-RA	0.724764	1	0.521298	0.844837	0.457793	0.35233	0.738068	0.303912	1	0.674361	0.591328	0.876944	Eaf	0.673803	18C	2.83825	3.29042	2.83825
CG11166-RB	1	1	24	13	CG11166-RB	0.724764	1	0.521298	0.844837	0.457793	0.35233	0.738068	0.303912	1	0.674361	0.591328	0.876944	Eaf	0.673803	18C	2.83825	3.29042	2.83825
CG11166-RC	1	1	24	13	CG11166-RC	0.724764	1	0.521298	0.844837	0.457793	0.35233	0.738068	0.303912	1	0.674361	0.591328	0.876944	Eaf	0.673803	18C	2.83825	3.29042	2.83825
CG11166-RD	1	1	24	13	CG11166-RD	0.724764	1	0.521298	0.844837	0.457793	0.35233	0.694653	0.286035	1	0.634692	0.556544	0.825359	Eaf	0.658192	18C	2.83825	3.49607	2.83825
CG11166-RF	1	1	24	13	CG11166-RF	0.724764	1	0.521298	0.844837	0.457793	0.35233	0.738068	0.303912	1	0.674361	0.591328	0.876944	Eaf	0.673803	18C	2.83825	3.29042	2.83825
CG11166-RG	1	1	24	13	CG11166-RG	0.724764	1	0.521298	0.844837	0.457793	0.35233	0.738068	0.303912	1	0.674361	0.591328	0.876944	Eaf	0.673803	18C	2.83825	3.29042	2.83825
CG11168-RA	0.772187	1	24	21	CG11168-RA	0.771288	0.497868	0.477785	0.400823	1	0.552553	0.278483	0.550416	0.880397	0.787958	0.7933	1	CG11168	0.665906	18C	3.59089	1.81681	1.81681
CG11170-RB	1	1	24	15	CG11170-RB	0.703631	0.611271	0.184036	0.578967	1	0.228038	0.471231	0.271652	0.478849	1	0.880932	0.186633	CG11170	0.549603	18C	5.43373	5.35812	5.35812
CG11172-RA	1	1	24	13	CG11172-RA	1	0.70083	0.627723	0.822827	0.487268	0.555578	0.685554	0.801061	0.923008	0.927179	0.773793	1	NFAT	0.775402	18C	2.05226	1.29234	1.29234
CG11172-RB	1	1	24	13	CG11172-RB	1	0.70083	0.627723	0.822827	0.487268	0.555578	0.685554	0.801061	0.923008	0.927179	0.773793	1	NFAT	0.775402	18C	2.05226	1.29234	1.29234
CG11173-RA	0.772187	1	24	17	CG11173-RA	0.577198	0.657341	0.5823	0.624199	1	0.609288	0.495621	0.644577	1	0.673855	0.654586	0.864708	Snap29	0.698639	18C	2.01767	1.55141	1.55141
CG11175-RA	1	1	24	21	CG11175-RA	0.527724	0.554767	0.473234	0.744386	1	0.586383	0.526023	0.0866396	0.950269	0.620152	0.337153	1	Rcd6	0.617228	18C	2.11312	11.5421	2.11312
CG11176-RA	0.421631	1	24	5	CG11176-RA	1	0.657028	0.280233	0.35264	0.676761	0.555578	0.672945	0.57207	1	0.470901	0.148412	0.632775	Tango2	0.584945	18C	3.56845	6.73801	3.56845
CG11178-RA	1	1	24	13	CG11178-RA	1	0.374749	0.741061	0.731402	0.210548	0.324087	0.35949	1	0.938059	0.640439	0.75098	0.708724	CG11178	0.648295	18C	4.74951	1.56143	1.56143
CG11178-RB	1	1	24	13	CG11178-RB	1	0.374749	0.741061	0.731402	0.210548	0.324087	0.35949	1	0.938059	0.640439	0.75098	0.759347	CG11178	0.652514	18C	4.74951	1.56143	1.56143
CG11180-RA	0.300911	1	24	21	CG11180-RA	0.737874	0.638801	0.681148	1	0.98698	0.675206	1	0.0527062	0.722607	0.867704	0.786228	0.760423	CG11180	0.742473	18C	1.56543	18.9731	1.56543
CG11183-RA	1	1	24	13	CG11183-RA	0.514265	0.657002	0.722973	0.476045	0.609061	1	0.487151	0.509741	0.711802	1	0.453051	0.653719	Dcp1	0.649568	18C	2.10064	2.20726	2.10064
CG11184-RB	0.300911	1	24	9	CG11184-RB	1	0.799052	0.832208	0.473749	0.459377	0.412474	0.642834	0.407831	1	0.639976	0.376415	0.437529	Upf3	0.623454	18C	2.42439	2.65664	2.42439
CG11186-RA	1	1	24	15	CG11186-RA	1	0.454974	0.683408	0.557399	0.855776	0.878171	0.801366	0.617309	0.846337	1	0.505731	0.218751	toy	0.701602	18C	2.19793	4.57141	2.19793
CG11188-RA	1	1	24	21	CG11188-RA	0.574767	0.408114	0.688358	0.448043	0.458587	1	0.526023	0.693117	0.890878	0.682168	0.842882	1	Aatf	0.684411	18C	2.45029	1.46592	1.46592
CG1119-RA	0.353312	1	24	15	CG1119-RA	0.220968	0.813019	0.82357	1	0.732758	0.429677	0.800611	0.513209	0.68407	1	0.314362	0.822707	Gnf1	0.679579	18C	4.52555	3.18105	3.18105
CG1119-RB	0.353312	1	24	15	CG1119-RB	0.220968	0.813019	0.82357	1	0.732758	0.429677	0.800611	0.513209	0.68407	1	0.314362	0.822707	Gnf1	0.679579	18C	4.52555	3.18105	3.18105
CG11190-RA	1	1	24	15	CG11190-RA	0.659654	0.755099	0.862667	0.361854	1	0.171028	0.823104	0.643387	0.466247	1	0.810722	0.813326	CG11190	0.697257	18C	5.84698	2.14478	2.14478
CG11191-RA	0.0454225	1	24	11	CG11191-RA	0.743428	0.716398	1	0.808335	0.402499	0.567919	0.575259	0.672182	1	0.54256	0.584371	0.467704	CG11191	0.673388	18C	2.48448	2.13811	2.13811
CG11198-RA	0.0454225	1	24	1	CG11198-RA	0.944138	0.687325	0.780139	0.863663	0.854559	1	0.828848	0.882293	0.666932	0.782587	0.847521	1	ACC	0.844834	18C	1.45492	1.4994	1.45492
CG11198-RB	0.0454225	1	24	1	CG11198-RB	0.944138	0.687325	0.780139	0.863663	0.854559	1	0.828848	0.882293	0.666932	0.782587	0.847521	1	ACC	0.844834	18C	1.45492	1.4994	1.45492
CG11198-RC	0.0454225	1	24	1	CG11198-RC	0.944138	0.687325	0.780139	0.863663	0.854559	1	0.828848	0.882293	0.666932	0.782587	0.847521	1	ACC	0.844834	18C	1.45492	1.4994	1.45492
CG11198-RD	0.0454225	1	24	1	CG11198-RD	0.944138	0.687325	0.780139	0.863663	0.854559	1	0.828848	0.882293	0.666932	0.782587	0.847521	1	ACC	0.844834	18C	1.45492	1.4994	1.45492
CG11200-RA	1	1	24	1	CG11200-RA	1	0.525623	0.859382	0.724871	0.631644	0.555578	0.679446	0.664237	0.560923	0.440997	0.724254	1	CG11200	0.697246	18C	1.90251	2.26759	1.90251
CG11200-RB	1	1	24	1	CG11200-RB	1	0.525623	0.859382	0.724871	0.631644	0.555578	0.679446	0.664237	0.560923	0.440997	0.724254	1	CG11200	0.697246	18C	1.90251	2.26759	1.90251
CG11205-RA	1	1	24	15	CG11205-RA	0.631384	0.583661	0.761612	0.628076	1	0.714654	0.873163	0.794412	0.788692	1	0.906101	0.764096	phr	0.787154	18C	1.71332	1.30874	1.30874
CG11205-RB	1	1	24	15	CG11205-RB	0.662053	0.594273	0.775459	0.639495	1	0.727648	0.873163	0.794412	0.788692	1	0.906101	0.764096	phr	0.793783	18C	1.68273	1.30874	1.30874
CG11206-RA	1	1	24	3	CG11206-RA	0.949413	0.840963	0.74496	0.878853	0.799588	1	1	0.632118	0.640825	0.688249	0.65827	0.607996	Liprin-gamma	0.78677	18C	1.34235	1.64475	1.34235
CG11206-RB	1	1	24	3	CG11206-RB	0.949413	0.840963	0.74496	0.878853	0.799588	1	1	0.632118	0.640825	0.688249	0.65827	0.607996	Liprin-gamma	0.78677	18C	1.34235	1.64475	1.34235
CG11206-RC	1	1	24	3	CG11206-RC	0.949413	0.840963	0.74496	0.878853	0.799588	1	1	0.632118	0.640825	0.688249	0.65827	0.607996	Liprin-gamma	0.78677	18C	1.34235	1.64475	1.34235
CG11207-RA	1	1	24	9	CG11207-RA	1	0.891966	0.927318	0.374012	0.689066	0.353549	0.358652	0.0945159	0.907075	0.270612	0.122601	1	feo	0.582447	18C	2.82846	10.5802	2.82846
CG11208-RA	1	1	24	21	CG11208-RA	0.94848	1	0.692001	0.931045	0.977481	0.905991	0.738129	0.754603	0.781673	0.954235	0.886385	1	CG11208	0.880835	18C	1.44508	1.3252	1.3252
CG1121-RA	1	1	24	3	CG1121-RA	0.888276	0.592496	0.452431	0.448797	0.590605	1	0.875875	0.941503	0.798081	1	0.919233	0.905574	alpha-Est8	0.784406	18C	2.22818	1.25301	1.25301
CG11210-RA	0.576952	1	24	23	CG11210-RA	0.996811	0.970842	0.736142	0.578967	1	0.798132	0.350682	0.558344	0.29036	0.909557	0.799177	1	CG11210	0.749084	18C	2.85159	3.444	2.85159
CG11211-RA	1	1	24	13	CG11211-RA	0.879429	0.946253	0.982359	1	0.713645	0.728363	0.952865	0.955268	0.620638	1	0.770775	0.974659	CG11211	0.877021	18C	1.40126	1.61125	1.40126
CG11212-RA	1	1	24	9	CG11212-RA	0.543573	1	0.568689	0.447267	0.686689	0.70466	0.651237	0.429053	1	0.614218	0.333926	0	Ptr	0.581609	18C	2.2358	Inf	2.2358
CG11217-RA	1	1	24	9	CG11217-RA	0.709129	0.58655	0.53054	0.56992	1	0.73756	0.758924	1	0.999428	0.655578	0.72131	0.485414	CanB2	0.729529	18C	1.88487	2.0601	1.88487
CG11218-RA	1	1	24	21	CG11218-RA	0.763972	0.783321	0.735875	0.881073	1	0.727865	0.701851	1	0.716158	0.921209	0.953877	0.918048	Obp56d	0.841937	18C	1.4248	1.39634	1.39634
CG11219-RA	0.421631	1	24	9	CG11219-RA	1	0.911699	0.826316	0.990305	0.704311	0.533453	0.827917	1	0.957441	0.922829	0.632493	0.842603	PIP82	0.845781	18C	1.87458	1.58105	1.58105
CG11221-RA	0.170207	1	24	9	CG11221-RA	0.764669	0.656481	1	0.713082	0.193199	0.198255	0.842022	0.616385	1	0.279426	0.493051	0.434767	CG11221	0.599278	18C	5.176	3.57876	3.57876
CG11228-RA	0.576952	1	24	13	CG11228-RA	0.926871	0.781525	1	0.762655	0.658634	0	0.0706846	0.372552	0.191539	1	0.483254	0.223959	hpo	0.539306	18C	Inf	5.22086	5.22086
CG11236-RA	1	1	24	3	CG11236-RA	0.787841	0.980459	1	0.686389	0.175636	0.765987	0.664777	0.98237	0.505064	0.814499	0.769876	1	CG11236	0.761075	18C	5.6936	1.97995	1.97995
CG11238-RA	1	1	24	1	CG11238-RA	0.469088	0.611271	0.966187	0.434225	1	0.798132	0.699009	1	0.505109	0.320219	0.955792	0.531543	l(3)04053	0.690881	18C	2.30295	3.12286	2.30295
CG1124-RA	1	1	24	3	CG1124-RA	0.927514	0.823745	0.834434	0.717129	1	0.606373	0.771897	1	0.682575	0.899319	0.665203	0.916625	CG1124	0.820401	18C	1.64915	1.5033	1.5033
CG11241-RA	0.576952	1	24	15	CG11241-RA	0.716196	0.83215	0.739429	0.434225	1	0.732979	0.377797	0.690505	0.847617	1	0.718632	0.571482	CG11241	0.721751	18C	2.64692	1.74984	1.74984
CG11242-RA	0.772187	1	24	11	CG11242-RA	0.833293	0.796555	1	0.947818	0.743074	0.953151	0.556544	1	0.936857	0.524909	0.562097	0.224429	TBCB	0.756561	18C	1.7968	4.45575	1.7968
CG11246-RA	1	1	24	19	CG11246-RA	0.72562	0.718019	0.87992	0.841311	1	0.705492	0.616626	1	0.745487	0.778416	0.697216	0.973862	Rpb8	0.806831	18C	1.62173	1.43428	1.43428
CG11247-RA	0.113223	1	24	11	CG11247-RA	0.873907	0.826184	1	0.868882	0.689998	0.849666	0.990565	0.870149	1	0.970896	0.763539	0.640015	CG11247	0.861983	18C	1.44928	1.56246	1.44928
CG11247-RB	0.113223	1	24	11	CG11247-RB	0.873907	0.826184	1	0.868882	0.689998	0.849666	0.990565	0.870149	1	0.970896	0.763539	0.640015	CG11247	0.861983	18C	1.44928	1.56246	1.44928
CG11247-RC	0.113223	1	24	11	CG11247-RC	0.873907	0.826184	1	0.868882	0.689998	0.849666	0.990565	0.870149	1	0.970896	0.763539	0.640015	CG11247	0.861983	18C	1.44928	1.56246	1.44928
CG11248-RA	1	1	24	3	CG11248-RA	0.951122	0.356432	0.37315	1	0.700899	0.513744	0.676878	1	0.240853	0.154764	0.157761	0.441926	CG11248	0.547294	18C	2.80558	6.46144	2.80558
CG11248-RB	1	1	24	3	CG11248-RB	0.951122	0.356432	0.37315	1	0.700899	0.513744	0.676878	1	0.240853	0.154764	0.157761	0.441926	CG11248	0.547294	18C	2.80558	6.46144	2.80558
CG11255-RA	0.576952	1	24	19	CG11255-RA	0.520775	0.590803	0.648697	0.755245	0.814137	1	0.44789	1	0.480415	0.70405	0.86122	0.674076	AdenoK	0.708109	18C	2.23269	2.08153	2.08153
CG11255-RB	0.576952	1	24	19	CG11255-RB	0.520775	0.590803	0.648697	0.755245	0.814137	1	0.44789	1	0.480415	0.70405	0.86122	0.674076	AdenoK	0.708109	18C	2.23269	2.08153	2.08153
CG11257-RA	1	1	24	9	CG11257-RA	1	0.797194	0.235396	0.740544	0.757973	0	0.189731	1	0.754055	0.286314	0.583716	0.24046	CG11257	0.548782	18C	Inf	4.1587	4.1587
CG11258-RA	1	1	24	3	CG11258-RA	0.749249	1	0.985599	0.906621	0.793404	0.728466	0.804974	0.766629	0.712702	0.744183	0.858207	1	mRpL20	0.837503	18C	1.37275	1.40311	1.37275
CG11259-RA	1	1	24	15	CG11259-RA	0.369406	0.647228	0.579712	0.434225	1	0.307851	0.514588	0.768455	0.867637	0.61476	0.967481	1	MICAL-like	0.672612	18C	3.24832	1.62665	1.62665
CG11265-RC	0.576952	1	24	21	CG11265-RC	0.253307	0.569561	0.447206	0.625284	1	0.944076	0.93326	0.421961	1	0.940617	0.758464	0.753737	Trf4-1	0.720623	18C	3.94777	2.36989	2.36989
CG11265-RE	0.576952	1	24	21	CG11265-RE	0.253307	0.569561	0.447206	0.625284	1	0.944076	0.93326	0.421961	1	0.940617	0.758464	0.753737	Trf4-1	0.720623	18C	3.94777	2.36989	2.36989
CG11265-RF	0.576952	1	24	21	CG11265-RF	0.253307	0.569561	0.447206	0.625284	1	0.944076	0.93326	0.421961	1	0.940617	0.758464	0.753737	Trf4-1	0.720623	18C	3.94777	2.36989	2.36989
CG11265-RG	0.772187	1	24	19	CG11265-RG	0.253307	0.569561	0.447206	0.625284	1	0.944076	0.314038	1	0.425486	0.592373	0.984042	0.331669	Trf4-1	0.62392	18C	3.94777	3.01506	3.01506
CG11266-RB	0.772187	1	24	7	CG11266-RB	1	0.424541	0.603579	0.886121	0.655938	0.598314	0.931407	1	0.810142	0.422963	0.47169	0.50278	CG11266	0.69229	18C	2.35548	2.36427	2.35548
CG11267-RA	1	1	24	21	CG11267-RA	0.618623	0.769551	0.647867	0.712628	1	0.579369	0.563442	0.783667	0.821899	0.958988	0.644787	1	CG11267	0.758402	18C	1.77481	1.5509	1.5509
CG11268-RA	0.421631	1	24	7	CG11268-RA	0.628546	0.911043	0.448356	0.517185	0.216555	1	0.692931	1	0.6557	0.715784	0.563977	0.543648	ste14	0.65781	18C	4.61776	1.83942	1.83942
CG11271-RB	1	1	24	13	CG11271-RB	0.785646	0.857409	0.882628	1	0.727972	0.894691	0.723511	1	0.748443	0.822325	0.817547	0.956852	RpS12	0.851419	18C	1.38215	1.33611	1.33611
CG11274-RA	1	1	24	15	CG11274-RA	1	0.660398	0.543222	0.949416	0.583056	0.299157	0.300037	0.474414	0.514921	0.396175	1	0.380258	SRm160	0.591754	18C	3.34272	2.62979	2.62979
CG11275-RA	1	1	24	13	CG11275-RA	1	0.84252	0.982522	0.858602	0.939227	0.727082	0.558032	1	0.685505	0.936835	0.772565	0.876971	CG11275	0.848322	18C	1.79201	1.45878	1.45878
CG11276-RA	1	1	24	13	CG11276-RA	0.868285	0.989141	0.976008	1	0.863825	0.888222	0.732874	1	0.780213	0.854498	0.911175	0.994029	RpS4	0.904856	18C	1.36449	1.2817	1.2817
CG11276-RB	1	1	24	13	CG11276-RB	0.868285	0.989141	0.976008	1	0.863825	0.888222	0.732874	1	0.780213	0.854498	0.911175	0.994029	RpS4	0.904856	18C	1.36449	1.2817	1.2817
CG11278-RA	0.576952	1	24	17	CG11278-RA	0.253192	0.527898	0.556271	1	0.575738	0.0984675	0.447119	0.259919	0.296959	0.409301	0.64059	1	Syx13	0.505455	18C	10.1556	3.84736	3.84736
CG11279-RA	0.300911	1	24	5	CG11279-RA	1	0.838677	0.738497	0.701823	0.613066	0.743494	0.384043	0.745254	0.599174	0.349042	0.393842	1	CG11279	0.675576	18C	2.60387	2.86499	2.60387
CG1128-RA	0.300911	1	24	9	CG1128-RA	0.30344	0.632663	1	0.399486	0.344999	0.590046	0.876688	1	0.543676	0.876219	0.492021	0.398002	alpha-Est9	0.621437	18C	3.29554	2.51255	2.51255
CG1128-RB	0.300911	1	24	9	CG1128-RB	0.30344	0.632663	1	0.399486	0.344999	0.590046	0.876688	1	0.543676	0.876219	0.492021	0.398002	alpha-Est9	0.621437	18C	3.29554	2.51255	2.51255
CG11282-RC	1	1	24	3	CG11282-RC	0.33625	0.33962	0.41904	0.406876	0.524729	1	1	0.658827	0.466684	0.361543	0.313352	0.528072	caps	0.529583	18C	2.97397	3.1913	2.97397
CG11284-RA	1	1	24	13	CG11284-RA	0.32913	0.819939	0.419661	0.72782	0.545719	1	0.406679	0.803793	0.682195	1	0.63303	0.312929	CG11284	0.640075	18C	3.03832	3.19561	3.03832
CG1129-RA	0.300911	1	24	9	CG1129-RA	0.978432	1	0.76773	0.697736	0.741624	0.126839	1	0.798579	0.520058	0.628771	0.310762	0.537673	CG1129	0.675684	18C	7.88403	3.2179	3.2179
CG1129-RB	0.300911	1	24	9	CG1129-RB	0.978432	1	0.76773	0.697736	0.741624	0.126839	1	0.798579	0.520058	0.628771	0.310762	0.537673	CG1129	0.675684	18C	7.88403	3.2179	3.2179
CG11290-RA	0.772187	1	24	15	CG11290-RA	0.717516	1	0.998048	0.93926	0.247208	0.761033	0.754212	0.705736	0.760234	1	0.794006	0.74807	enok	0.785444	18C	4.04517	1.41696	1.41696
CG11294-RA	1	1	24	13	CG11294-RA	0.34944	1	0.731171	0.766743	0.220722	0.452996	0.332225	0.492478	0.412617	0.430843	0.638815	1	CG11294	0.569004	18C	4.5306	2.42356	2.42356
CG11295-RA	1	1	24	21	CG11295-RA	0.642832	0.551882	0.5044	0.740515	0.852685	1	0.89691	1	0.934779	0.845927	0.766496	0.699519	l(2)dtl	0.786329	18C	1.98255	1.42955	1.42955
CG11299-RA	0.248511	1	24	13	CG11299-RA	0.664149	0.869584	1	0.797565	0.34014	0.663178	0.642834	0.55946	1	0.561382	0.769786	0.417413	Sesn	0.690458	18C	2.93997	2.39571	2.39571
CG11299-RB	0.248511	1	24	13	CG11299-RB	0.664149	0.869584	1	0.797565	0.34014	0.663178	0.642834	0.55946	1	0.561382	0.769786	0.417413	Sesn	0.690458	18C	2.93997	2.39571	2.39571
CG11299-RC	0.248511	1	24	13	CG11299-RC	0.664149	0.869584	1	0.797565	0.34014	0.663178	0.642834	0.55946	1	0.561382	0.769786	0.417413	Sesn	0.690458	18C	2.93997	2.39571	2.39571
CG1130-RA	0.300911	1	24	3	CG1130-RA	1	0.907064	0.801	0.719974	0.829033	0.972261	0.781861	0.661611	0.65439	0.737418	0.606875	1	scrt	0.805957	18C	1.38894	1.64779	1.38894
CG11301-RA	1	1	24	1	CG11301-RA	0.737874	0.692034	0.851435	1	0.164497	0.759607	0.946841	0.207935	0.522648	0.57054	0.876597	1	Mes4	0.694167	18C	6.07915	4.8092	4.8092
CG11303-RA	0.576952	1	24	11	CG11303-RA	1	0.857198	0.9998	0.729927	0.988217	0.742264	0.76175	0.691685	1	0.781732	0.62569	0.62027	TM4SF	0.816544	18C	1.37	1.6122	1.37
CG11303-RB	0.576952	1	24	11	CG11303-RB	1	0.857198	0.9998	0.729927	0.988217	0.742264	0.76175	0.691685	1	0.781732	0.62569	0.62027	TM4SF	0.816544	18C	1.37	1.6122	1.37
CG11305-RA	1	1	24	21	CG11305-RA	0.263862	0.970842	0.41408	0.86845	1	0.513085	0.450877	0.519837	0.254536	0.106312	0.433482	1	Sirt7	0.56628	18C	3.78986	9.40629	3.78986
CG11306-RA	1	1	24	13	CG11306-RA	0.897469	0.95165	0.938936	1	0.850321	0.836217	0.99815	1	0.894137	0.949192	0.97991	0.94093	CG11306	0.936409	18C	1.19586	1.1184	1.1184
CG11307-RB	0.300911	1	24	7	CG11307-RB	1	0.788434	0.784653	0.587733	0.721879	0.74077	0.535711	1	0.362914	0.16842	0.534119	0.339473	CG11307	0.630342	18C	1.86668	5.93754	1.86668
CG11309-RA	1	1	24	1	CG11309-RA	0.750991	0.784142	0.652972	0.68474	1	0.789361	0.650947	1	0.73845	0.654681	0.872674	0.93447	CG11309	0.792786	18C	1.53622	1.52746	1.52746
CG11309-RB	1	1	24	3	CG11309-RB	0.729532	1	0.700385	0.833328	0.796921	0.901223	0.658154	1	0.750926	0.665293	0.888088	0.949866	CG11309	0.82281	18C	1.5194	1.5031	1.5031
CG1131-RB	1	1	24	9	CG1131-RB	1	0.919839	0.980817	0.514267	0.710599	0.972261	1	0.354753	0.555852	0.798056	0.131476	0.487451	alpha-Est10	0.702114	18C	1.94452	7.60594	1.94452
CG11312-RA	1	1	24	9	CG11312-RA	0.410452	0.143828	0.276053	0.434225	1	0	0.64581	0.607825	1	0.174029	0.157687	0.643092	insc	0.45775	18C	Inf	6.34166	6.34166
CG11314-RA	1	1	24	21	CG11314-RA	0.843244	0.960416	0.902832	1	0.839179	0.819853	0.761622	0.959248	0.686078	0.8625	1	0.956107	Npc2g	0.88259	18C	1.31299	1.45756	1.31299
CG11315-RA	0.489949	1	24	23	CG11315-RA	0.514265	0.763506	0.764564	0.746083	0.871919	1	0.593211	0.800978	0.718464	0.956549	0.988472	1	Npc2h	0.809834	18C	1.94452	1.39186	1.39186
CG11315-RB	0.772187	1	24	21	CG11315-RB	0.514265	0.763506	0.764564	0.746083	0.871919	1	0.596266	0.795607	0.753397	0.965729	1	0.998034	Npc2h	0.814114	18C	1.94452	1.32732	1.32732
CG11317-RA	1	1	24	9	CG11317-RA	1	0.490581	0.784653	0.493696	0.631644	0.907443	1	0.34004	0.903259	0.547639	0.330811	0.490596	CG11317	0.66003	18C	2.0384	3.02287	2.0384
CG11319-RA	0.421631	1	24	3	CG11319-RA	1	0.585352	0.6301	0.635821	0.430666	0.854411	0.981909	0.623805	0.72854	0.611884	0.869105	1	CG11319	0.745966	18C	2.32198	1.6343	1.6343
CG11321-RB	1	1	24	15	CG11321-RB	0.640807	0.716574	0.561966	0.744386	1	0.0732979	0.919747	0.605954	1	0.674695	0.873346	0.366967	CG11321	0.681478	18C	13.643	2.72504	2.72504
CG11321-RC	0.209359	1	24	9	CG11321-RC	1	0.963641	0.448373	0.470187	0	0.277789	0.461293	0.729389	1	0.348057	0.551906	0.233852	CG11321	0.540374	18C	Inf	4.27621	4.27621
CG11324-RB	1	1	24	9	CG11324-RB	0.574767	0.408114	0.688358	0.448043	0.51591	1	1	0.329414	0.802897	0.340584	0.37982	0.246433	homer	0.561195	18C	2.45029	4.05789	2.45029
CG11324-RC	1	1	24	9	CG11324-RC	0.574767	0.408114	0.688358	0.448043	0.51591	1	1	0.329414	0.802897	0.340584	0.37982	0.246433	homer	0.561195	18C	2.45029	4.05789	2.45029
CG11325-RA	0.300911	1	24	3	CG11325-RA	0.703631	0.791056	0.41408	0.627214	1	0.570094	1	0.671258	0.681705	0.355908	0.499858	0.836944	AkhR	0.679312	18C	2.41499	2.80971	2.41499
CG11325-RB	1	1	24	1	CG11325-RB	0.686041	0.711951	0.41408	0.86845	1	0.513085	1	0.671258	0.681705	0.355908	0.499858	0.836944	AkhR	0.686607	18C	2.41499	2.80971	2.41499
CG11325-RC	0.300911	1	24	3	CG11325-RC	0.703631	0.791056	0.41408	0.627214	1	0.570094	1	0.671258	0.681705	0.355908	0.499858	0.836944	AkhR	0.679312	18C	2.41499	2.80971	2.41499
CG11326-RA	1	1	24	3	CG11326-RA	0.935028	0.573384	0.183418	0.423151	0.177181	1	1	0.4263	0.664161	0.804457	0.754055	0.111827	Tsp	0.587747	18C	5.64393	8.94239	5.64393
CG11326-RC	0.772187	1	24	13	CG11326-RC	0.835534	0.798501	0.791834	1	0.678549	0.316503	0.805165	0.78766	1	0.828433	0.802773	0.688027	Tsp	0.777748	18C	3.15953	1.45343	1.45343
CG11326-RD	0.772187	1	24	13	CG11326-RD	0.835534	0.798501	0.791834	1	0.678549	0.316503	0.805165	0.78766	1	0.828433	0.802773	0.688027	Tsp	0.777748	18C	3.15953	1.45343	1.45343
CG11326-RE	0.772187	1	24	13	CG11326-RE	0.835534	0.798501	0.791834	1	0.678549	0.316503	0.805165	0.78766	1	0.828433	0.802773	0.688027	Tsp	0.777748	18C	3.15953	1.45343	1.45343
CG11326-RF	1	1	24	3	CG11326-RF	0.935028	0.573384	0.183418	0.423151	0.177181	1	1	0.4263	0.664161	0.804457	0.754055	0.111827	Tsp	0.587747	18C	5.64393	8.94239	5.64393
CG11326-RG	1	1	24	3	CG11326-RG	0.888276	0.458707	0.183418	0.192342	0.177181	1	1	0.4263	0.664161	0.804457	0.754055	0.111827	Tsp	0.55506	18C	5.64393	8.94239	5.64393
CG11328-RD	0.576952	1	24	1	CG11328-RD	0.657117	0.560642	0.538027	0.517185	0.595526	1	0.668874	0.197543	1	0.576469	0.561762	0.613861	Nhe3	0.623917	18C	1.93354	5.06219	1.93354
CG11328-RE	0.576952	1	24	1	CG11328-RE	0.657117	0.560642	0.538027	0.517185	0.595526	1	0.668874	0.197543	1	0.576469	0.561762	0.613861	Nhe3	0.623917	18C	1.93354	5.06219	1.93354
CG11328-RG	0.576952	1	24	1	CG11328-RG	0.657117	0.560642	0.538027	0.517185	0.595526	1	0.668874	0.197543	1	0.576469	0.561762	0.613861	Nhe3	0.623917	18C	1.93354	5.06219	1.93354
CG11328-RH	0.576952	1	24	1	CG11328-RH	0.657117	0.560642	0.538027	0.517185	0.595526	1	0.668874	0.197543	1	0.576469	0.561762	0.613861	Nhe3	0.623917	18C	1.93354	5.06219	1.93354
CG11331-RA	1	1	24	21	CG11331-RA	0.751231	0.912074	0.969239	0.925125	0.850297	1	0.83994	0.924155	0.840426	0.858878	0.886989	1	Spn27A	0.896529	18C	1.33115	1.18987	1.18987
CG11334-RA	0.027207	1	24	15	CG11334-RA	0.714268	0.902166	0.869957	1	0.868658	0.60117	0.46982	0.702717	0.722574	1	0.683645	0.627622	CG11334	0.76355	18C	2.12848	1.59331	1.59331
CG11334-RB	0.027207	1	24	15	CG11334-RB	0.714268	0.902166	0.869957	1	0.868658	0.60117	0.46982	0.702717	0.722574	1	0.683645	0.627622	CG11334	0.76355	18C	2.12848	1.59331	1.59331
CG11335-RA	1	1	24	15	CG11335-RA	0.983832	0.67429	0.771967	1	0.657987	0.900275	0.167163	0.220264	0.905951	0.472984	1	0.635575	lox	0.699191	18C	5.98217	4.54001	4.54001
CG11337-RA	1	1	24	13	CG11337-RA	0.790652	1	0.73671	0.528588	0.280918	0.57654	0.390048	0.513949	0.654298	0.945968	1	0.635575	CG11337	0.671104	18C	3.55975	1.94572	1.94572
CG11337-RB	1	1	24	13	CG11337-RB	0.790652	1	0.73671	0.528588	0.280918	0.57654	0.390048	0.513949	0.654298	0.945968	1	0.635575	CG11337	0.671104	18C	3.55975	1.94572	1.94572
CG11337-RC	1	1	24	13	CG11337-RC	0.790652	1	0.73671	0.528588	0.280918	0.57654	0.390048	0.513949	0.654298	0.945968	1	0.635575	CG11337	0.671104	18C	3.55975	1.94572	1.94572
CG1134-RA	0.772187	1	24	1	CG1134-RA	0.545751	0.630722	0.732924	0.690859	0.855171	1	1	0.709506	0.712185	0.525991	0.887465	0.877411	Mul1	0.763999	18C	1.83234	1.90117	1.83234
CG11345-RA	0.772187	1	24	13	CG11345-RA	0.210415	1	0.722326	0.432839	0.897126	0.664881	0.527192	0.22229	1	0.278446	0.117139	0.106904	CG11345	0.514963	18C	4.7525	9.35421	4.7525
CG11347-RA	0.027207	1	24	21	CG11347-RA	0.669078	0.517204	0.606331	0.562166	1	0.687167	0.809189	0.543837	0.702847	0.846906	1	0.716193	DOR	0.721743	18C	1.93347	1.83879	1.83879
CG11347-RB	0.0454225	1	24	21	CG11347-RB	0.669078	0.517204	0.606331	0.562166	1	0.687167	0.806996	0.553332	0.720827	0.864016	1	0.717829	DOR	0.725412	18C	1.93347	1.80723	1.80723
CG11347-RC	0.170207	1	24	21	CG11347-RC	0.706109	0.451236	0.612372	0.452573	1	0.592577	0.805967	0.562459	0.730693	0.857283	1	0.722588	DOR	0.707821	18C	2.21613	1.77791	1.77791
CG11347-RD	0.0454225	1	24	21	CG11347-RD	0.669078	0.517204	0.606331	0.562166	1	0.687167	0.806996	0.553332	0.720827	0.864016	1	0.717829	DOR	0.725412	18C	1.93347	1.80723	1.80723
CG11347-RE	0.027207	1	24	21	CG11347-RE	0.669078	0.517204	0.606331	0.562166	1	0.687167	0.809189	0.543837	0.702847	0.846906	1	0.716193	DOR	0.721743	18C	1.93347	1.83879	1.83879
CG11347-RF	0.027207	1	24	21	CG11347-RF	0.669078	0.517204	0.606331	0.562166	1	0.687167	0.809189	0.543837	0.702847	0.846906	1	0.716193	DOR	0.721743	18C	1.93347	1.83879	1.83879
CG11348-RA	1	1	24	1	CG11348-RA	0.725246	0.727756	0.58976	0.661852	0.824575	1	0.973277	1	0.832025	0.814136	0.915924	0.77094	nAChRbeta1	0.819624	18C	1.69561	1.29712	1.29712
CG11348-RB	0.141715	1	24	3	CG11348-RB	1	0.64028	0.392327	0.338811	0.640933	0.657706	0.919846	0.7668	0.796946	0.625587	1	0.919941	nAChRbeta1	0.724931	18C	2.9515	1.5985	1.5985
CG1135-RA	1	1	24	15	CG1135-RA	0.969364	0.647673	0.658443	1	0.63057	0.731473	0.745165	0.603149	1	0.883529	0.718691	0.526167	Rcd5	0.759519	18C	1.58587	1.90054	1.58587
CG11350-RB	0.421631	1	24	13	CG11350-RB	0.777698	0.630196	0.544842	0.342809	1	0.216036	0.237236	0.312595	1	0.969587	0	0.200444	CG11350	0.519287	18C	4.62886	Inf	4.62886
CG11352-RB	0.576952	1	24	23	CG11352-RB	1	0.793587	0.415405	0.822827	0.780266	0.800685	0.720089	0.385461	0.589449	0.551815	1	0.770023	jim	0.719134	18C	2.40729	2.59429	2.40729
CG11352-RC	1	1	24	1	CG11352-RC	1	0.793587	0.415405	0.822827	0.780266	0.800685	1	0.770968	0.88404	0.908039	0.909144	0.768513	jim	0.821123	18C	2.40729	1.30121	1.30121
CG11352-RD	1	1	24	1	CG11352-RD	1	0.793587	0.415405	0.822827	0.780266	0.800685	1	0.770968	0.88404	0.908039	0.909144	0.768513	jim	0.821123	18C	2.40729	1.30121	1.30121
CG11354-RA	0.772187	1	24	23	CG11354-RA	1	0.651553	0.392327	0.514267	0.710599	0.729196	0.322691	0.425195	0.208195	1	0.472749	0.525817	Lim1	0.579382	18C	3.09894	4.80319	3.09894
CG11357-RA	1	1	24	3	CG11357-RA	0.668545	0.504578	0.20176	0.380836	0.292349	1	0.63263	0.375115	1	0.895004	0.459546	0.200444	CG11357	0.550901	18C	4.95638	4.98891	4.95638
CG11357-RB	1	1	24	3	CG11357-RB	0.668545	0.504578	0.20176	0.380836	0.292349	1	0.63263	0.375115	1	0.895004	0.459546	0.200444	CG11357	0.550901	18C	4.95638	4.98891	4.95638
CG11357-RC	1	1	24	3	CG11357-RC	0.668545	0.504578	0.20176	0.380836	0.292349	1	0.63263	0.375115	1	0.895004	0.459546	0.200444	CG11357	0.550901	18C	4.95638	4.98891	4.95638
CG1136-RA	1	1	24	9	CG1136-RA	0.575698	0.764906	0.564655	0.6316	1	0.746305	1	0.452329	0.903259	0.492694	0.408165	0.435068	CG1136	0.664557	18C	1.77099	2.44999	1.77099
CG11367-RA	0.772187	1	24	13	CG11367-RA	0.637224	0.55358	1	0.917569	0.100625	0.309774	0.232742	0.340748	0.420453	1	0.221	0.426069	CG11367	0.513315	18C	9.93792	4.52488	4.52488
CG11368-RA	1	1	24	13	CG11368-RA	0.788486	0.968313	0.889099	1	0.741949	0.805772	0.908283	0.928938	0.756504	1	0.972963	0.940358	CG11368	0.891722	18C	1.3478	1.32187	1.32187
CG11371-RB	1	1	24	15	CG11371-RB	1	0.306613	0.784653	0.987392	0.568479	0.194452	0.304453	0.0729389	1	0.339356	0.354797	0.456011	dbr	0.530762	18C	5.14265	13.7101	5.14265
CG11372-RA	1	1	24	21	CG11372-RA	0.765203	0.680862	0.529782	1	0.767651	0.816916	0.67401	1	0.747823	0.870954	0.979663	0.491009	galectin	0.776989	18C	1.88757	2.03662	1.88757
CG11375-RA	1	1	24	21	CG11375-RA	0.588059	0.480818	0.645992	1	0.371444	0.571747	0.648248	1	0.328471	0.864906	0.878276	0.961839	polybromo	0.694983	18C	2.6922	3.04441	2.6922
CG11376-RA	1	1	24	13	CG11376-RA	0.850726	0.968848	0.667525	1	0.921181	0.472644	0.252975	1	0.761672	0.413564	0.807113	0.577104	Zir	0.724446	18C	3.95296	2.418	2.418
CG11377-RA	0.300911	1	24	3	CG11377-RA	1	0.953908	0.566694	0.777114	0.421096	0.648174	0.838349	0.649797	0.356351	0.581393	0.568945	1	CG11377	0.696818	18C	2.37476	2.80622	2.37476
CG11378-RA	0.0931041	1	24	11	CG11378-RA	0.734605	1	0.801251	0.475846	0.760185	0.395105	0.593407	0.583512	1	0.655739	0.457924	0.280622	CG11378	0.64485	18C	2.53097	3.56351	2.53097
CG11380-RA	1	1	24	15	CG11380-RA	0.376945	0.739689	0.41408	0.248129	1	0.146596	0	0.108058	1	0.618768	0.350417	0.259835	CG11380	0.438543	18C	Inf	9.25432	9.25432
CG11387-RA	1	1	24	15	CG11387-RA	0.671648	0.617809	0.903447	0.71055	1	0.839594	0.235615	0.931379	0.851287	1	0.604068	0.895837	ct	0.771769	18C	4.24421	1.65544	1.65544
CG11387-RC	1	1	24	15	CG11387-RC	0.671648	0.617809	0.903447	0.71055	1	0.839594	0.235615	0.931379	0.851287	1	0.604068	0.895837	ct	0.771769	18C	4.24421	1.65544	1.65544
CG11388-RA	1	1	24	3	CG11388-RA	0.526808	0.815324	0.610201	0.701812	0.689279	1	0.6492	1	0.627691	0.698537	0.546989	0.845955	CG11388	0.725983	18C	1.89822	1.82819	1.82819
CG11390-RA	1	1	24	3	CG11390-RA	0.845107	1	0.898154	0.895352	0.919979	0.897823	0.923709	0.860027	0.784367	0.889047	0.82657	1	PebIII	0.895011	18C	1.18328	1.27491	1.18328
CG11395-RA	1	1	24	21	CG11395-RA	0.989289	0.815632	0.867001	0.96866	0.911879	1	0.58836	1	0.648156	0.784844	0.942308	0.933454	CG11395	0.870799	18C	1.69964	1.54284	1.54284
CG11396-RA	0.00325557	0.744181	24	17	CG11396-RA	0.369881	0.583253	0.829223	1	0.901155	0.719241	0.682584	0.308369	0.757476	0.827722	1	0.716787	CG11396	0.724641	18C	2.70357	3.24287	2.70357
CG11397-RA	0.772187	1	24	1	CG11397-RA	0.678502	0.508536	0.473234	0.186096	1	0.732978	0.171529	0.316423	0.185922	0.0970673	0.175906	1	glu	0.460516	18C	5.82991	10.3021	5.82991
CG11398-RA	0.421631	1	24	15	CG11398-RA	0.743428	0.130254	1	0.873875	0.804997	0.413032	0.771105	0.254013	0.696507	1	0.988474	0	CG11398	0.63964	18C	7.6773	Inf	7.6773
CG11399-RB	1	1	24	13	CG11399-RB	0.615677	0.862971	0.782151	0.940821	1	0.456076	1	0.891355	0.571178	0.748977	0.502703	0.503221	CG11399	0.739594	18C	2.19262	1.98924	1.98924
CG1140-RA	0.576952	1	24	23	CG1140-RA	0.933054	0.913554	0.849018	1	0.958326	0.975782	0.64109	0.794918	0.7617	0.671315	0.870978	1	SCOT	0.864145	18C	1.55984	1.48961	1.48961
CG1140-RB	0.576952	1	24	23	CG1140-RB	0.933054	0.913554	0.849018	1	0.958326	0.975782	0.64109	0.794918	0.7617	0.671315	0.870978	1	SCOT	0.864145	18C	1.55984	1.48961	1.48961
CG11400-RA	1	1	24	1	CG11400-RA	1	0.906792	0.85978	0.884101	0.907148	0.951574	0.681129	0.52162	0.657303	0.587504	1	0.582874	CG11400	0.794985	18C	1.46815	1.91711	1.46815
CG11405-RA	0.576952	1	24	11	CG11405-RA	1	0.783567	0.948123	0.754258	0.315822	0.648174	0.587442	0.664886	1	0.53274	0.772347	0.601333	Atf3	0.717391	18C	3.16634	1.87709	1.87709
CG11406-RA	1	1	24	3	CG11406-RA	0.171422	0.946083	0.80704	0.14105	0.324832	1	0.295888	0.389878	0.668158	0	0.252864	1	CG11406	0.499768	18C	7.08966	Inf	7.08966
CG11406-RB	1	1	24	3	CG11406-RB	0.171422	0.946083	0.80704	0.14105	0.324832	1	0.295888	0.389878	0.668158	0	0.252864	1	CG11406	0.499768	18C	7.08966	Inf	7.08966
CG11407-RA	0.209359	1	24	23	CG11407-RA	1	0.696095	0.551378	0.711634	0.870644	0.840874	0.679949	0.68758	0.52133	0.477245	1	0.821667	CG11407	0.7382	18C	1.81364	2.09536	1.81364
CG11413-RA	1	1	24	15	CG11413-RA	0.207144	0.728888	0.588226	0.304363	1	0.661736	0.520989	0.292765	1	0.438985	0.361754	0.041268	CG11413	0.512177	18C	4.82756	24.2319	4.82756
CG11414-RA	1	1	24	1	CG11414-RA	0.767598	0.804132	0.690133	0.855292	1	0.466441	1	0.579314	0.685231	0.756151	0.530439	0.764793	CG11414	0.741627	18C	2.14389	1.88523	1.88523
CG11416-RA	0.880418	1	24	1	CG11416-RA	0.428554	0.525602	0.470773	0.705252	0.487249	1	0.578625	0.83174	0.332594	0.545734	0.359629	1	uri	0.605479	18C	2.33343	3.00667	2.33343
CG11417-RA	0.576952	1	24	7	CG11417-RA	0.364128	0.74431	1	0.299614	0.229999	0.590046	1	0.416101	0.808179	0.546038	0.494766	0.600334	CG11417	0.591126	18C	4.34784	2.40326	2.40326
CG11418-RA	1	1	24	3	CG11418-RA	0.385699	0.748982	0.30264	0.211576	0.730873	1	0.394517	0.404318	0.791891	0.454778	0.112384	1	CG11418	0.544805	18C	4.72644	8.89805	4.72644
CG11418-RB	1	1	24	3	CG11418-RB	0.385699	0.748982	0.30264	0.211576	0.730873	1	0.394517	0.404318	0.791891	0.454778	0.112384	1	CG11418	0.544805	18C	4.72644	8.89805	4.72644
CG11419-RA	1	1	24	9	CG11419-RA	0.97139	0.630722	0.80704	0.869811	0.703804	1	0.505949	1	0.94665	0.306765	0.525035	0.549622	APC10	0.734732	18C	1.97648	3.25983	1.97648
CG1142-RA	1	1	24	13	CG1142-RA	0.173617	0.638801	0.408689	1	0.219329	0.675206	0.851014	0.841007	0.864771	0.802639	1	0.539276	CG1142	0.667862	18C	5.75979	1.85434	1.85434
CG11425-RA	0.353312	1	24	1	CG11425-RA	0.933124	0.38671	0.478381	0.382942	0.943631	1	0.296543	0.774578	0.213905	0.374562	0.358197	1	CG11425	0.595214	18C	3.37219	4.67497	3.37219
CG11426-RA	1	1	24	21	CG11426-RA	0.877733	0.372634	0.503292	1	0.767651	0.853385	0.527389	0.95551	0.625234	0.823836	1	0.584848	CG11426	0.740959	18C	2.6836	1.70985	1.70985
CG11427-RA	0.663955	1	24	13	CG11427-RA	0.897024	0.709779	0.908197	1	0.603154	0.337603	0.676768	0.445873	0.489037	1	0.289181	0.343087	rb	0.641642	18C	2.96206	3.45804	2.96206
CG1143-RA	1	1	24	21	CG1143-RA	0.669741	0.762734	0.741351	0.925028	0.951835	1	1	0.635711	0.689329	0.893517	0.937057	0.5781	CG1143	0.815367	18C	1.49311	1.72981	1.49311
CG11430-RA	1	1	24	9	CG11430-RA	0.992612	1	0.611958	0.64173	0.671761	0.551473	0.787188	0.812973	0.845554	0.782573	1	0.835877	olf186-F	0.794475	18C	1.81333	1.27784	1.27784
CG11430-RB	1	1	24	9	CG11430-RB	0.992612	1	0.611958	0.64173	0.671761	0.551473	0.787188	0.812973	0.845554	0.782573	1	0.835877	olf186-F	0.794475	18C	1.81333	1.27784	1.27784
CG11430-RD	1	1	24	9	CG11430-RD	0.992612	1	0.611958	0.64173	0.671761	0.551473	0.787188	0.812973	0.845554	0.782573	1	0.835877	olf186-F	0.794475	18C	1.81333	1.27784	1.27784
CG11430-RE	1	1	24	9	CG11430-RE	0.992612	1	0.611958	0.64173	0.671761	0.551473	0.787188	0.812973	0.845554	0.782573	1	0.835877	olf186-F	0.794475	18C	1.81333	1.27784	1.27784
CG11436-RA	1	1	24	21	CG11436-RA	1	0.849083	0.241432	0.949416	0.291528	0.747893	0.263011	0	0.712702	0.44651	0.85412	1	CG11436	0.612975	18C	4.14196	Inf	4.14196
CG11437-RA	0.880418	1	24	3	CG11437-RA	1	0.490581	0.627723	0.822827	0	0.388904	1	0.310036	0.0531329	0.221919	0.100541	0.59641	CG11437	0.467673	18C	Inf	18.8207	18.8207
CG11438-RA	0.0214013	1	24	11	CG11438-RA	0.702115	1	0.835261	0.521811	0.600853	0.396371	0.521149	0.899807	0.900885	1	0.422335	0.284694	CG11438	0.673774	18C	2.52289	3.51254	2.52289
CG11440-RA	1	1	24	1	CG11440-RA	0.726865	0.732711	0.789096	0.647241	1	0.890638	1	0.752224	0.654084	0.787771	0.52389	0.937175	laza	0.786808	18C	1.54502	1.9088	1.54502
CG11444-RA	1	1	24	5	CG11444-RA	0.940307	0.98261	0.843218	0.88424	1	0.858251	0.656212	0.908695	0.658588	1	0.615318	0.908671	CG11444	0.854676	18C	1.5239	1.62518	1.5239
CG11447-RA	0.576952	1	24	1	CG11447-RA	1	0.585352	0.677655	0.878929	0.990532	0.751292	0.539173	0.41587	0.308838	0.471316	0.460775	1	CG11447	0.673311	18C	1.85469	3.23795	1.85469
CG11448-RA	0.421631	1	24	5	CG11448-RA	0.776073	0.819939	0.85106	0.738591	0.691007	1	0.820697	1	0.836954	0.615907	0.739072	0.905918	CG11448	0.816268	18C	1.44716	1.62362	1.44716
CG11454-RA	0.209359	1	24	15	CG11454-RA	0.631968	0.924132	0.839174	1	0.644827	0.708966	0.610865	0.821678	0.977092	0.948233	0.79394	1	CG11454	0.825073	18C	1.63702	1.25954	1.25954
CG11455-RA	1	1	24	21	CG11455-RA	0.976898	0.950801	1	0.998504	0.893309	0.996854	0.693579	0.831248	0.760634	0.848632	1	0.889074	CG11455	0.903294	18C	1.4418	1.31469	1.31469
CG11455-RB	1	1	24	21	CG11455-RB	0.976898	0.950801	1	0.998504	0.893309	0.996854	0.693579	0.831248	0.760634	0.848632	1	0.889074	CG11455	0.903294	18C	1.4418	1.31469	1.31469
CG11456-RA	0.353312	1	24	9	CG11456-RA	1	0.836218	0.784653	0.448815	0.172267	0.176775	1	0.790593	0.301086	0.44014	0.56973	0.168983	CG11456	0.557438	18C	5.80496	5.91776	5.80496
CG11458-RA	1	1	24	13	CG11458-RA	0.484715	0.744364	0.561753	0.409792	1	0.60925	0.596323	0.720678	1	0.680805	0.408148	0.580476	CG11458	0.649692	18C	2.44026	2.45009	2.44026
CG11459-RA	0.421631	1	24	21	CG11459-RA	0.431774	0.500131	0.715229	0.572388	1	0.932882	0.854545	0.750664	0.664671	1	0.818196	0.892494	CG11459	0.761081	18C	2.31603	1.5045	1.5045
CG1146-RA	1	1	24	9	CG1146-RA	0.744385	0.652109	0.679445	1	0.431804	0.561265	1	0.816946	0.668411	0.622483	0.84605	0.519623	CG1146	0.711877	18C	2.31587	1.92447	1.92447
CG1146-RB	1	1	24	9	CG1146-RB	0.744385	0.652109	0.679445	1	0.431804	0.561265	1	0.816946	0.668411	0.622483	0.84605	0.519623	CG1146	0.711877	18C	2.31587	1.92447	1.92447
CG1146-RC	1	1	24	9	CG1146-RC	0.744385	0.652109	0.679445	1	0.431804	0.561265	1	0.816946	0.668411	0.622483	0.84605	0.519623	CG1146	0.711877	18C	2.31587	1.92447	1.92447
CG11466-RA	1	1	24	9	CG11466-RA	1	0.971964	0.902351	0.880425	0.757973	0.884757	0.85953	0.868371	0.886229	0.926925	1	0.801907	Cyp9f2	0.895036	18C	1.31931	1.24703	1.24703
CG11466-RB	1	1	24	9	CG11466-RB	1	0.971964	0.902351	0.880425	0.757973	0.884757	0.85953	0.868371	0.886229	0.926925	1	0.801907	Cyp9f2	0.895036	18C	1.31931	1.24703	1.24703
CG11471-RA	1	1	24	13	CG11471-RA	0.580761	0.732062	1	0.730073	0.550251	0.784238	0.823591	0.576754	0.795937	0.956031	0.708759	1	Aats-ile	0.769871	18C	1.81735	1.73384	1.73384
CG11471-RC	1	1	24	13	CG11471-RC	0.580761	0.732062	1	0.730073	0.550251	0.784238	0.823591	0.576754	0.795937	0.956031	0.708759	1	Aats-ile	0.769871	18C	1.81735	1.73384	1.73384
CG11471-RD	1	1	24	13	CG11471-RD	0.580761	0.732062	1	0.730073	0.550251	0.784238	0.823591	0.576754	0.795937	0.956031	0.708759	1	Aats-ile	0.769871	18C	1.81735	1.73384	1.73384
CG11474-RA	1	1	24	1	CG11474-RA	0.514265	0.729835	0.622574	0.713312	0.807441	1	1	0.831377	0.951648	0.578245	0.890204	0.87509	CG11474	0.792833	18C	1.94452	1.72937	1.72937
CG11474-RB	1	1	24	1	CG11474-RB	0.514265	0.729835	0.622574	0.713312	0.807441	1	1	0.837098	0.945765	0.571442	0.919947	0.87225	CG11474	0.794494	18C	1.94452	1.74996	1.74996
CG11475-RA	0.353312	1	24	21	CG11475-RA	0	0.258891	0.165632	0.260535	1	0.615702	0.624077	0.616738	0.704629	0.441452	1	0.790938	CG11475	0.539883	18C	Inf	2.26525	2.26525
CG1148-RA	0.576952	1	24	3	CG1148-RA	1	0.613226	0.896747	0.587733	0.360939	0.833366	0.704906	0.724482	0.611244	0.465386	1	0.643232	Osi2	0.703439	18C	2.77055	2.14875	2.14875
CG1148-RB	0.576952	1	24	3	CG1148-RB	1	0.613226	0.896747	0.587733	0.360939	0.833366	0.704906	0.724482	0.611244	0.465386	1	0.643232	Osi2	0.703439	18C	2.77055	2.14875	2.14875
CG11482-RA	1	1	24	13	CG11482-RA	0.869717	1	0.76773	0.80508	0.515017	0.634194	0.318081	0.139707	0.239424	1	0.135915	0.0671878	Mlh1	0.541004	18C	3.14386	14.8837	3.14386
CG11486-RA	0.576952	1	24	21	CG11486-RA	0.496681	0.533011	0.255755	0.625795	1	0.995988	0.887785	0.72193	0.879799	1	0.858412	0.649375	CG11486	0.742044	18C	3.90999	1.53994	1.53994
CG11486-RB	0.576952	1	24	21	CG11486-RB	0.496681	0.533011	0.255755	0.625795	1	0.995988	0.887785	0.72193	0.879799	1	0.858412	0.649375	CG11486	0.742044	18C	3.90999	1.53994	1.53994
CG11486-RC	0.421631	1	24	21	CG11486-RC	0.496681	0.533011	0.255755	0.625795	1	0.995988	0.864119	0.635666	0.828408	1	0.824552	0.718909	CG11486	0.731574	18C	3.90999	1.57315	1.57315
CG11486-RD	0.300911	1	24	21	CG11486-RD	0.496681	0.533011	0.255755	0.625795	1	0.995988	0.887785	0.728615	0.856887	1	0.910437	0.642945	CG11486	0.744492	18C	3.90999	1.55534	1.55534
CG11486-RF	0.576952	1	24	21	CG11486-RF	0.496681	0.533011	0.255755	0.625795	1	0.995988	0.887785	0.72193	0.879799	1	0.858412	0.649375	CG11486	0.742044	18C	3.90999	1.53994	1.53994
CG11486-RG	0.576952	1	24	21	CG11486-RG	0.496681	0.533011	0.255755	0.625795	1	0.995988	0.887785	0.72193	0.879799	1	0.858412	0.649375	CG11486	0.742044	18C	3.90999	1.53994	1.53994
CG11486-RH	0.576952	1	24	21	CG11486-RH	0.496681	0.533011	0.255755	0.625795	1	0.995988	0.887785	0.72193	0.879799	1	0.858412	0.649375	CG11486	0.742044	18C	3.90999	1.53994	1.53994
CG11486-RJ	0.576952	1	24	21	CG11486-RJ	0.496681	0.533011	0.255755	0.625795	1	0.995988	0.887785	0.72193	0.879799	1	0.858412	0.649375	CG11486	0.742044	18C	3.90999	1.53994	1.53994
CG11486-RK	0.576952	1	24	21	CG11486-RK	0.496681	0.533011	0.255755	0.625795	1	0.995988	0.887785	0.72193	0.879799	1	0.858412	0.649375	CG11486	0.742044	18C	3.90999	1.53994	1.53994
CG11486-RL	0.576952	1	24	21	CG11486-RL	0.496681	0.533011	0.255755	0.625795	1	0.995988	0.887785	0.72193	0.879799	1	0.858412	0.649375	CG11486	0.742044	18C	3.90999	1.53994	1.53994
CG11486-RM	0.576952	1	24	21	CG11486-RM	0.496681	0.533011	0.255755	0.625795	1	0.995988	0.887785	0.72193	0.879799	1	0.858412	0.649375	CG11486	0.742044	18C	3.90999	1.53994	1.53994
CG11486-RN	0.576952	1	24	21	CG11486-RN	0.496681	0.533011	0.255755	0.625795	1	0.995988	0.887785	0.72193	0.879799	1	0.858412	0.649375	CG11486	0.742044	18C	3.90999	1.53994	1.53994
CG11486-RO	0.576952	1	24	21	CG11486-RO	0.496681	0.533011	0.255755	0.625795	1	0.995988	0.887785	0.72193	0.879799	1	0.858412	0.649375	CG11486	0.742044	18C	3.90999	1.53994	1.53994
CG11486-RP	0.576952	1	24	21	CG11486-RP	0.496681	0.533011	0.255755	0.625795	1	0.995988	0.887785	0.72193	0.879799	1	0.858412	0.649375	CG11486	0.742044	18C	3.90999	1.53994	1.53994
CG11486-RQ	0.576952	1	24	21	CG11486-RQ	0.496681	0.533011	0.255755	0.625795	1	0.995988	0.887785	0.72193	0.879799	1	0.858412	0.649375	CG11486	0.742044	18C	3.90999	1.53994	1.53994
CG11488-RA	0.0454225	1	24	15	CG11488-RA	0.642815	0.603605	0.890558	1	0.85647	0.683576	0.462408	0.750848	0.548461	1	0.718495	0.449892	mRpL10	0.717261	18C	2.16259	2.22276	2.16259
CG11489-RB	1	1	24	9	CG11489-RB	0.637224	0.568382	1	0.524325	0.329317	0.337935	0.574321	1	0.685505	0.73513	0.823863	0.753874	srpk79D	0.664156	18C	3.03659	1.45878	1.45878
CG11489-RD	1	1	24	9	CG11489-RD	0.637224	0.603906	1	0.524325	0.329317	0.337935	0.574321	1	0.685505	0.73513	0.823863	0.753874	srpk79D	0.667117	18C	3.03659	1.45878	1.45878
CG11490-RA	1	1	24	13	CG11490-RA	1	0.761246	0.703482	0.907947	0.457397	0.80463	0.755724	0.401286	0.438096	1	0.626559	0.214429	Tbc1d15-17	0.672566	18C	2.18628	4.66355	2.18628
CG11491-RB	0.0592039	1	24	23	CG11491-RB	0.642832	0.236521	0.7566	0.317363	0.852685	1	0.568356	0.572686	0.0905951	0.252258	1	0.76269	br	0.587715	18C	4.22796	11.0381	4.22796
CG11491-RC	0.0592039	1	24	23	CG11491-RC	0.642832	0.236521	0.7566	0.317363	0.852685	1	0.568356	0.572686	0.0905951	0.252258	1	0.76269	br	0.587715	18C	4.22796	11.0381	4.22796
CG11491-RH	0.0592039	1	24	23	CG11491-RH	0.642832	0.236521	0.7566	0.317363	0.852685	1	0.568356	0.572686	0.0905951	0.252258	1	0.76269	br	0.587715	18C	4.22796	11.0381	4.22796
CG11491-RI	0.0592039	1	24	23	CG11491-RI	0.642832	0.236521	0.7566	0.317363	0.852685	1	0.568356	0.572686	0.0905951	0.252258	1	0.76269	br	0.587715	18C	4.22796	11.0381	4.22796
CG11494-RA	1	1	24	3	CG11494-RA	0.810215	0.922712	0.771967	1	0.767651	0.78774	1	0.891355	0.292231	0.527058	0.804325	0.410032	BtbVII	0.748774	18C	1.30268	3.42195	1.30268
CG11494-RB	1	1	24	3	CG11494-RB	0.810215	0.922712	0.771967	1	0.767651	0.78774	1	0.891355	0.292231	0.527058	0.804325	0.410032	BtbVII	0.748774	18C	1.30268	3.42195	1.30268
CG11495-RA	1	1	24	3	CG11495-RA	0.385699	0.709562	0.30264	0.423151	0.487249	1	0	1	0.249274	0.0650713	0.0589612	0.61208	rasp	0.441141	18C	Inf	16.9603	16.9603
CG11500-RA	1	1	24	21	CG11500-RA	0.411412	0.52823	0.585104	0.708778	0.487249	1	0.58614	0.71292	0.447984	0.722921	0.597242	1	Spase12	0.648998	18C	2.43065	2.23222	2.23222
CG11501-RA	0.772187	1	24	21	CG11501-RA	0.637224	0.530321	1	0.561777	0.948747	0.531041	0.0220782	0.494554	0.219365	0.270702	1	0.643569	Diedel	0.571615	18C	45.2936	4.5586	4.5586
CG11502-RC	1	1	24	9	CG11502-RC	1	0.760401	0.847426	0.757001	0.454784	0.622247	0.648514	0.445835	0.725852	0.53187	1	0.6611	svp	0.704586	18C	2.19885	2.24298	2.19885
CG11504-RA	1	1	24	3	CG11504-RA	1	0.788434	0.411009	0.979556	0.721879	0.462981	0.708521	0.360703	0.610888	0.379685	0.467885	1	CG11504	0.657628	18C	2.43304	2.77236	2.43304
CG11504-RB	1	1	24	3	CG11504-RB	1	0.788434	0.411009	0.979556	0.721879	0.462981	0.708521	0.360703	0.610888	0.379685	0.467885	1	CG11504	0.657628	18C	2.43304	2.77236	2.43304
CG11504-RC	1	1	24	3	CG11504-RC	1	0.752596	0.499325	0.972432	0.689066	0.441937	0.708521	0.360703	0.610888	0.379685	0.467885	1	CG11504	0.65692	18C	2.26277	2.77236	2.26277
CG11516-RA	0.353312	1	24	1	CG11516-RA	0.839064	0.879691	0.722088	0.868574	0.820629	1	0.60777	0.646284	0.414138	0.472657	0.546734	1	Ptp99A	0.734802	18C	1.64536	2.41466	1.64536
CG11516-RC	0.353312	1	24	1	CG11516-RC	0.839064	0.879691	0.722088	0.868574	0.820629	1	0.60777	0.646284	0.414138	0.472657	0.546734	1	Ptp99A	0.734802	18C	1.64536	2.41466	1.64536
CG11516-RD	0.353312	1	24	1	CG11516-RD	0.839064	0.879691	0.722088	0.868574	0.820629	1	0.60777	0.646284	0.414138	0.472657	0.546734	1	Ptp99A	0.734802	18C	1.64536	2.41466	1.64536
CG11516-RE	0.353312	1	24	1	CG11516-RE	0.839064	0.879691	0.722088	0.868574	0.820629	1	0.60777	0.646284	0.414138	0.472657	0.546734	1	Ptp99A	0.734802	18C	1.64536	2.41466	1.64536
CG11518-RA	1	1	24	1	CG11518-RA	1	0.45992	0.326939	0.205707	0.631644	0	0.334327	0.330396	0.226488	0.630645	1	0.741504	pygo	0.490631	18C	Inf	4.41525	4.41525
CG1152-RA	1	1	24	9	CG1152-RA	0.527724	0.719142	0.41408	0.578967	1	0.456076	0.881993	1	0.592869	0.444947	0.70116	0.18197	Gld	0.624911	18C	2.41499	5.49542	2.41499
CG11522-RA	1	1	24	13	CG11522-RA	0.86882	0.968411	0.945558	1	0.819128	0.813413	0.738007	0.936005	0.760382	0.84494	0.857758	1	RpL6	0.879369	18C	1.355	1.31513	1.31513
CG11522-RB	1	1	24	13	CG11522-RB	0.86882	0.968411	0.945558	1	0.819128	0.813413	0.738007	0.936005	0.760382	0.84494	0.857758	1	RpL6	0.879369	18C	1.355	1.31513	1.31513
CG11523-RA	1	1	24	21	CG11523-RA	0.667112	1	0.610694	0.579413	0.912984	0.86481	0.557766	0.143403	0.700414	0.718521	0.37203	1	CG11523	0.677262	18C	1.79287	6.97333	1.79287
CG11525-RA	1	1	24	21	CG11525-RA	0.860103	0.833159	0.907479	0.946085	0.897899	1	0.695331	0.810046	0.787848	0.768962	0.762616	1	CycG	0.855794	18C	1.43816	1.31128	1.31128
CG11525-RB	1	1	24	21	CG11525-RB	0.860103	0.833159	0.907479	0.946085	0.897899	1	0.695331	0.810046	0.787848	0.768962	0.762616	1	CycG	0.855794	18C	1.43816	1.31128	1.31128
CG11525-RC	1	1	24	21	CG11525-RC	0.860103	0.833159	0.907479	0.946085	0.897899	1	0.695331	0.810046	0.787848	0.768962	0.762616	1	CycG	0.855794	18C	1.43816	1.31128	1.31128
CG11525-RD	1	1	24	21	CG11525-RD	0.860103	0.833159	0.907479	0.946085	0.897899	1	0.69456	0.809148	0.786975	0.768109	0.761771	1	CycG	0.855441	18C	1.43976	1.31273	1.31273
CG11525-RE	1	1	24	21	CG11525-RE	0.860103	0.833159	0.907479	0.946085	0.897899	1	0.695331	0.810046	0.787848	0.768962	0.762616	1	CycG	0.855794	18C	1.43816	1.31128	1.31128
CG11526-RA	1	1	24	15	CG11526-RA	0.603113	0.924611	0.887314	0.806418	1	0.732978	1	0.658827	0.855719	0.769417	0.967042	0.600334	CG11526	0.817148	18C	1.65807	1.66574	1.65807
CG11526-RB	1	1	24	15	CG11526-RB	0.603113	0.924611	0.887314	0.806418	1	0.732978	1	0.658827	0.855719	0.769417	0.967042	0.600334	CG11526	0.817148	18C	1.65807	1.66574	1.65807
CG11527-RA	1	1	24	3	CG11527-RA	0.97685	0.881332	0.599095	0.86845	1	0.807836	0.628185	1	0.455083	0.715784	0.651298	0.678945	Tig	0.771905	18C	1.66919	2.1974	1.66919
CG11529-RA	1	1	24	13	CG11529-RA	0.339853	0.31261	1	0.62919	0.160999	0	0.0876705	0.173279	0.118784	0.082687	0.187307	1	CG11529	0.341032	18C	Inf	12.0938	12.0938
CG11533-RD	1	1	24	1	CG11533-RD	0.775751	0.50969	1	0.638309	0.944997	0.969727	0.865392	0.603682	0.689712	0.816201	0.522043	1	Asator	0.777959	18C	1.96198	1.91555	1.91555
CG11533-RE	1	1	24	13	CG11533-RE	0.318612	0.879216	1	0.524325	0.603748	0.309774	0.865392	0.603682	0.689712	0.816201	0.522043	1	Asator	0.677725	18C	3.22816	1.91555	1.91555
CG11533-RF	0.421631	1	24	23	CG11533-RF	0.775751	0.50969	1	0.638309	0.944997	0.969727	0.835448	0.550416	0.670778	0.809846	0.71397	1	Asator	0.784911	18C	1.96198	1.81681	1.81681
CG11534-RA	1	1	24	1	CG11534-RA	0.674973	0.512462	0.78182	0.661174	0.852685	1	1	0.2958	0.976994	0.577443	0.610425	0.750077	CG11534	0.724488	18C	1.95137	3.38066	1.95137
CG11537-RA	1	1	24	9	CG11537-RA	1	0.569424	0.616513	0.235093	0	0.138894	0.992215	0.646817	1	0.689547	0.901496	0.860398	CG11537	0.637533	18C	Inf	1.54603	1.54603
CG11537-RB	1	1	24	9	CG11537-RB	1	0.569424	0.616513	0.235093	0	0.138894	0.992215	0.646817	1	0.689547	0.901496	0.860398	CG11537	0.637533	18C	Inf	1.54603	1.54603
CG11537-RC	1	1	24	9	CG11537-RC	1	0.569424	0.616513	0.235093	0	0.138894	0.992215	0.646817	1	0.689547	0.901496	0.860398	CG11537	0.637533	18C	Inf	1.54603	1.54603
CG11537-RD	1	1	24	3	CG11537-RD	0.833464	0.967832	0.598323	0.496108	0.50405	1	0.992215	0.646817	1	0.689547	0.901496	0.860398	CG11537	0.790854	18C	2.01569	1.54603	1.54603
CG11537-RE	0.772187	1	24	7	CG11537-RE	0.81536	1	0.924119	0.521811	0.343345	0.880825	0.992215	0.646817	1	0.689547	0.901496	0.860398	CG11537	0.797994	18C	2.91253	1.54603	1.54603
CG11539-RA	1	1	24	9	CG11539-RA	0.791585	0.647228	0.966187	0.434225	1	0	0.0631227	0.914914	0.798226	0.44651	0.350639	1	CG11539	0.61772	18C	Inf	2.85194	2.85194
CG11546-RA	1	1	24	9	CG11546-RA	0.764669	0.93783	1	0.41946	0.965997	0.991277	0.335486	0.176822	1	0.221491	0.229364	0.127556	kermit	0.597496	18C	2.98075	7.83972	2.98075
CG11546-RB	1	1	24	9	CG11546-RB	0.764669	0.93783	1	0.41946	0.965997	0.991277	0.335486	0.176822	1	0.221491	0.229364	0.127556	kermit	0.597496	18C	2.98075	7.83972	2.98075
CG11546-RC	1	1	24	9	CG11546-RC	0.764669	0.93783	1	0.41946	0.965997	0.991277	0.335486	0.176822	1	0.221491	0.229364	0.127556	kermit	0.597496	18C	2.98075	7.83972	2.98075
CG11546-RD	1	1	24	9	CG11546-RD	0.764669	0.93783	1	0.41946	0.965997	0.991277	0.335486	0.176822	1	0.221491	0.229364	0.127556	kermit	0.597496	18C	2.98075	7.83972	2.98075
CG11550-RA	1	1	24	21	CG11550-RA	0.442357	0.647228	0.529779	0.466153	1	0.648902	0.608904	1	0.502172	0.815661	0.656115	0.964635	CG11550	0.690159	18C	2.26062	1.99135	1.99135
CG11555-RA	0.772187	1	24	9	CG11555-RA	1	0.969293	0.885899	0.982084	0.794649	0.501812	0.540446	1	0.768596	0.802546	0.668227	0.947266	CG11555	0.821735	18C	1.99278	1.4965	1.4965
CG11556-RA	0.772187	1	24	7	CG11556-RA	1	0.70083	0.298916	0.70528	0.631644	0.833366	0.823975	1	0.646333	0.777137	0.537389	0.274811	Rph	0.685807	18C	3.34543	3.63886	3.34543
CG11561-RA	0.576952	1	24	15	CG11561-RA	0.510435	0.998659	0.667525	1	0.736945	0.898024	0.184517	0.145878	1	0.73092	0.473062	0.420933	smo	0.647242	18C	5.41955	6.85505	5.41955
CG11562-RA	1	1	24	13	CG11562-RA	0.380109	0.603299	0.596508	0.625528	0.466064	1	0.739711	1	0.98921	0.96042	0.878447	0.669635	CG11562	0.742411	18C	2.63082	1.49335	1.49335
CG11563-RA	1	1	24	23	CG11563-RA	0.175908	0.37755	0.345067	0.26536	1	0.228038	1	0.568987	0.513215	0.643061	0.330185	0.633686	CG11563	0.506755	18C	5.68479	3.02861	3.02861
CG11567-RA	0.576952	1	24	1	CG11567-RA	1	0.815651	0.906541	0.567191	0.956664	0.849548	0.727284	0.83626	0.808762	0.747419	0.941096	1	Cpr	0.846368	18C	1.76307	1.33794	1.33794
CG11567-RB	0.576952	1	24	1	CG11567-RB	1	0.815651	0.906541	0.567191	0.956664	0.849548	0.727284	0.83626	0.808762	0.747419	0.941096	1	Cpr	0.846368	18C	1.76307	1.33794	1.33794
CG11576-RA	1	1	24	21	CG11576-RA	0.414269	0.359161	0.571653	0.505431	0.785012	1	0.819977	0.958132	0.866422	0.992244	0.766857	1	CG11576	0.753263	18C	2.78427	1.30402	1.30402
CG11577-RA	1	1	24	15	CG11577-RA	1	0.531463	0.836964	0.987392	0.378986	0.777809	0.941037	0.583512	1	0.91365	0.993431	0.3157	CG11577	0.771662	18C	2.63862	3.16756	2.63862
CG11579-RA	1	1	24	9	CG11579-RA	1	0.943982	0.877329	0.829306	0.977307	0.734937	0.959291	0.878712	0.801882	1	0.88273	0.765194	arm	0.887556	18C	1.36066	1.30686	1.30686
CG11579-RB	1	1	24	9	CG11579-RB	1	0.943982	0.877329	0.829306	0.977307	0.734937	0.959291	0.878712	0.801882	1	0.88273	0.765194	arm	0.887556	18C	1.36066	1.30686	1.30686
CG11579-RC	1	1	24	9	CG11579-RC	1	0.943982	0.877329	0.829306	0.977307	0.734937	0.959291	0.878712	0.801882	1	0.88273	0.765194	arm	0.887556	18C	1.36066	1.30686	1.30686
CG11579-RD	1	1	24	9	CG11579-RD	1	0.943982	0.877329	0.829306	0.977307	0.734937	0.959291	0.878712	0.801882	1	0.88273	0.765194	arm	0.887556	18C	1.36066	1.30686	1.30686
CG11579-RE	1	1	24	9	CG11579-RE	1	0.943982	0.877329	0.829306	0.977307	0.734937	0.959291	0.878712	0.801882	1	0.88273	0.765194	arm	0.887556	18C	1.36066	1.30686	1.30686
CG11583-RA	0.421631	1	24	23	CG11583-RA	0.603113	0.901496	0.384503	0.589306	1	0.806276	1	0.423532	0.580666	0.943157	0.732511	0.633686	CG11583	0.71652	18C	2.60076	2.3611	2.3611
CG11585-RB	1	1	24	21	CG11585-RB	0	0.310528	0.476803	1	0.575738	0.196935	0.736432	0.346558	0.190054	0.545734	0.314676	1	CG11585	0.474455	18C	Inf	5.26167	5.26167
CG11586-RA	0.421631	1	24	15	CG11586-RA	0.735931	0.668783	0.827912	0.787937	0.722472	1	0.566163	0.379786	0.920505	1	0.826928	0.639262	CG11586	0.756307	18C	1.76628	2.63306	1.76628
CG11589-RA	1	1	24	11	CG11589-RA	0.869717	1	0.392395	0.894533	0.700423	0.591914	0.548112	1	0.51032	0.827129	0.598129	0.641226	VhaM9.7-c	0.714491	18C	2.54845	1.95955	1.95955
CG11590-RA	0.300911	1	24	11	CG11590-RA	0.523524	0.745268	0.67486	1	0.496021	0.363572	0.538307	1	0.621737	0.599261	0.527908	0.715787	CG11590	0.65052	18C	2.75048	1.89427	1.89427
CG11593-RB	1	1	24	13	CG11593-RB	0.857875	0.811027	0.757276	1	0.677339	0.208519	0.835817	0.948828	0.882722	0.873201	1	0.81484	CG11593	0.80562	18C	4.79571	1.22724	1.22724
CG11594-RA	1	1	24	3	CG11594-RA	0.740246	0.96352	0.816918	0.752526	1	0.817221	0.618383	1	0.652236	0.720355	0.704071	0.821801	CG11594	0.800606	18C	1.61712	1.53319	1.53319
CG11594-RB	1	1	24	5	CG11594-RB	0.724421	0.950248	0.816867	0.74213	1	0.811607	0.618383	1	0.652236	0.720355	0.704071	0.821801	CG11594	0.796843	18C	1.61712	1.53319	1.53319
CG11594-RC	1	1	24	3	CG11594-RC	0.740246	0.96352	0.816918	0.752526	1	0.817221	0.618383	1	0.652236	0.720355	0.704071	0.821801	CG11594	0.800606	18C	1.61712	1.53319	1.53319
CG11596-RA	0.489949	1	24	9	CG11596-RA	0.81536	1	0.799718	0.503175	0.386263	0.792742	0.151785	1	0.191941	0.171788	0.207543	0	CG11596	0.501693	18C	6.58827	Inf	6.58827
CG11596-RB	0.489949	1	24	9	CG11596-RB	0.81536	1	0.799718	0.503175	0.386263	0.792742	0.151785	1	0.191941	0.171788	0.207543	0	CG11596	0.501693	18C	6.58827	Inf	6.58827
CG11596-RC	0.489949	1	24	9	CG11596-RC	0.81536	1	0.799718	0.503175	0.386263	0.792742	0.151785	1	0.191941	0.171788	0.207543	0	CG11596	0.501693	18C	6.58827	Inf	6.58827
CG11597-RA	1	1	24	3	CG11597-RA	1	0.122645	0.313861	0.822827	0	0.388904	0.591776	0.259919	0.356351	0.595346	0.269722	1	CG11597	0.476779	18C	Inf	3.84736	3.84736
CG11597-RB	1	1	24	3	CG11597-RB	1	0.122645	0.313861	0.822827	0	0.388904	0.591776	0.259919	0.356351	0.595346	0.269722	1	CG11597	0.476779	18C	Inf	3.84736	3.84736
CG11601-RA	1	1	24	13	CG11601-RA	0.607661	0.931585	0.544918	1	0.575738	0.675206	0.652129	0.859281	1	0.529237	0.557306	0.672724	CG11601	0.717149	18C	1.83514	1.88951	1.83514
CG11604-RA	0.0931041	1	24	17	CG11604-RA	0.257133	0.346897	0.645632	0.380836	0.682148	1	0.301973	0.397896	0.613709	0.712019	1	0.47839	mbm	0.568053	18C	3.88904	2.51322	2.51322
CG11606-RA	1	1	24	13	CG11606-RA	0.911492	0.186317	0.794672	1	0.191913	0.39387	0.350273	1	0.843698	0.495543	0.349232	0.517913	Rpp30	0.586244	18C	5.3672	2.86343	2.86343
CG1161-RA	0.880418	1	24	13	CG1161-RA	0.827454	0.95537	0.796363	1	0.685986	0.666227	0.699283	0.983928	0.663308	1	0.770362	0.695407	CG1161	0.811974	18C	1.50099	1.5076	1.50099
CG1161-RB	1	1	24	13	CG1161-RB	0.827454	0.95537	0.796363	1	0.685986	0.666227	0.71049	0.962105	0.655578	1	0.803348	0.706511	CG1161	0.814119	18C	1.50099	1.52537	1.50099
CG11614-RA	0.170207	1	24	7	CG11614-RA	1	0.70083	0.784653	0.117547	0	0.277789	1	0.101358	0.555852	0.0725505	0.131476	0.0974902	nkd	0.403295	18C	Inf	13.7835	13.7835
CG11617-RA	0.0592039	1	24	13	CG11617-RA	0.422179	0.485421	0.82816	0.738183	1	0.410468	0.579911	0.625191	1	0.646392	0.270321	0.467704	CG11617	0.622827	18C	2.43624	3.6993	2.43624
CG11621-RA	1	1	24	9	CG11621-RA	0.469088	0.467442	0.460089	0.337731	1	0.342057	0.984536	0.74843	0.410442	1	0.258886	0.287948	Pi3K68D	0.563887	18C	2.96094	3.8627	2.96094
CG11621-RB	1	1	24	13	CG11621-RB	0.257133	0.788403	0.40352	0.846303	0.243624	1	0	0.502945	0.689542	1	0.18122	0.430002	Pi3K68D	0.528558	18C	Inf	5.51815	5.51815
CG11621-RC	1	1	24	9	CG11621-RC	0.469088	0.467442	0.460089	0.337731	1	0.342057	0.984536	0.74843	0.410442	1	0.258886	0.287948	Pi3K68D	0.563887	18C	2.96094	3.8627	2.96094
CG11622-RA	1	1	24	9	CG11622-RA	0.489216	1	0.682426	0.357813	0.257508	0.739893	0.835975	0.59542	1	0.809765	0.926816	0.515428	Rlip	0.684188	18C	3.88337	1.94013	1.94013
CG11624-RA	1	1	24	15	CG11624-RA	0.949194	0.918716	0.875404	0.891764	1	0.826446	0.777331	0.786467	1	0.796506	0.967959	0.77567	Ubi-p63E	0.880455	18C	1.28645	1.28921	1.28645
CG11624-RB	0.576952	1	24	13	CG11624-RB	0.935712	0.891978	0.911672	0.857503	1	0.776095	0.777331	0.786467	1	0.796506	0.967777	0.77567	Ubi-p63E	0.873059	18C	1.2885	1.28921	1.2885
CG11624-RC	0.576952	1	24	13	CG11624-RC	0.935712	0.891978	0.911672	0.857503	1	0.776095	0.777331	0.786467	1	0.796506	0.967777	0.77567	Ubi-p63E	0.873059	18C	1.2885	1.28921	1.2885
CG1163-RA	0.576952	1	24	19	CG1163-RA	0.901997	0.675399	0.640705	1	0.881599	0.867745	0.60627	0.694657	1	0.863927	0.940493	0.826833	RpII18	0.824969	18C	1.64943	1.43956	1.43956
CG11638-RA	1	1	24	13	CG11638-RA	1	0.637755	0.439406	0.822827	0.227392	0.233343	0.686404	0.641863	1	0.918871	0.60552	0.897991	CG11638	0.675948	18C	4.3977	1.65147	1.65147
CG11641-RA	1	1	24	1	CG11641-RA	0.94282	0.341641	0.90792	0.387889	0.568457	1	1	0.164707	0.413994	0.86456	0.249257	0.528072	pdm3	0.61411	18C	2.92705	6.07139	2.92705
CG11641-RB	1	1	24	1	CG11641-RB	0.94282	0.341641	0.90792	0.387889	0.568457	1	1	0.164707	0.413994	0.86456	0.249257	0.528072	pdm3	0.61411	18C	2.92705	6.07139	2.92705
CG11642-RA	1	1	24	3	CG11642-RA	0.922652	0.964634	0.878249	0.883639	0.917174	1	0.621533	1	0.655957	0.974948	0.928131	0.970131	TRAM	0.893087	18C	1.60893	1.52449	1.52449
CG11642-RB	1	1	24	3	CG11642-RB	0.922652	0.964634	0.878249	0.883639	0.917174	1	0.621533	1	0.655957	0.974948	0.928131	0.970131	TRAM	0.893087	18C	1.60893	1.52449	1.52449
CG11642-RC	1	1	24	3	CG11642-RC	0.922652	0.964634	0.878249	0.883639	0.917174	1	0.621533	1	0.655957	0.974948	0.928131	0.970131	TRAM	0.893087	18C	1.60893	1.52449	1.52449
CG11652-RA	0.248511	1	24	21	CG11652-RA	0.226167	0.231153	0.354926	0.434225	1	0.879574	0.8101	0.474414	0.24391	0.169789	1	0.684465	CG11652	0.542394	18C	4.42151	5.88966	4.42151
CG11652-RB	0.248511	1	24	21	CG11652-RB	0.226167	0.231153	0.354926	0.434225	1	0.879574	0.8101	0.474414	0.24391	0.169789	1	0.684465	CG11652	0.542394	18C	4.42151	5.88966	4.42151
CG11654-RA	0.421631	1	24	19	CG11654-RA	0.576957	0.542502	0.598786	0.61779	1	0.643226	0.514588	0.806328	0.685902	0.771292	0.721055	1	Ahcy13	0.706535	18C	1.9433	1.45793	1.45793
CG11655-RA	0.421631	1	24	5	CG11655-RA	0.734665	0.765877	0.787825	0.382851	0.556856	1	0.733198	1	0.743598	0.606597	0.703537	0.798816	CG11655	0.734485	18C	2.61198	1.64854	1.64854
CG11658-RA	1	1	24	9	CG11658-RA	1	0.784359	0.620424	0.55493	0.749159	0.542657	0.593914	0.531846	1	0.690676	0.482918	0.672324	CG11658	0.685267	18C	1.84278	2.07075	1.84278
CG11658-RB	1	1	24	9	CG11658-RB	1	0.784359	0.620424	0.55493	0.749159	0.542657	0.593914	0.531846	1	0.690676	0.482918	0.672324	CG11658	0.685267	18C	1.84278	2.07075	1.84278
CG11658-RC	1	1	24	9	CG11658-RC	1	0.784359	0.620424	0.55493	0.749159	0.542657	0.593914	0.531846	1	0.690676	0.482918	0.672324	CG11658	0.685267	18C	1.84278	2.07075	1.84278
CG11658-RD	1	1	24	9	CG11658-RD	1	0.784359	0.620424	0.55493	0.749159	0.542657	0.593914	0.531846	1	0.690676	0.482918	0.672324	CG11658	0.685267	18C	1.84278	2.07075	1.84278
CG11658-RE	1	1	24	9	CG11658-RE	1	0.784359	0.620424	0.55493	0.749159	0.542657	0.593914	0.531846	1	0.690676	0.482918	0.672324	CG11658	0.685267	18C	1.84278	2.07075	1.84278
CG11660-RA	1	1	24	5	CG11660-RA	1	0.306613	0.784653	0.822827	0.473733	0.972261	0.159774	1	0.577267	0.79113	0.307219	0.860593	RIOK1	0.671339	18C	6.25886	3.25501	3.25501
CG11660-RB	1	1	24	5	CG11660-RB	1	0.306613	0.784653	0.822827	0.473733	0.972261	0.159774	1	0.577267	0.79113	0.307219	0.860593	RIOK1	0.671339	18C	6.25886	3.25501	3.25501
CG11661-RA	1	1	24	21	CG11661-RA	0.797252	0.843643	0.694226	1	0.783004	0.9831	0.709013	0.816554	0.60091	0.6137	1	0.739194	Nc73EF	0.798383	18C	1.44045	1.66414	1.44045
CG11661-RB	1	1	24	21	CG11661-RB	0.797252	0.843643	0.694226	1	0.783004	0.9831	0.709013	0.816554	0.602556	0.6137	1	0.762294	Nc73EF	0.800445	18C	1.44045	1.6596	1.44045
CG11661-RC	1	1	24	21	CG11661-RC	0.797252	0.843643	0.694226	1	0.783004	0.9831	0.709013	0.816554	0.60091	0.6137	1	0.739194	Nc73EF	0.798383	18C	1.44045	1.66414	1.44045
CG11661-RE	1	1	24	21	CG11661-RE	0.797252	0.843643	0.694226	1	0.783004	0.9831	0.709013	0.816554	0.602556	0.6137	1	0.762294	Nc73EF	0.800445	18C	1.44045	1.6596	1.44045
CG11661-RF	1	1	24	21	CG11661-RF	0.797252	0.843643	0.694226	1	0.783004	0.9831	0.709013	0.816554	0.602556	0.6137	1	0.762294	Nc73EF	0.800445	18C	1.44045	1.6596	1.44045
CG11661-RG	1	1	24	21	CG11661-RG	0.797252	0.843643	0.694226	1	0.783004	0.9831	0.709013	0.816554	0.60091	0.6137	1	0.739194	Nc73EF	0.798383	18C	1.44045	1.66414	1.44045
CG11661-RH	1	1	24	21	CG11661-RH	0.797252	0.843643	0.694226	1	0.783004	0.9831	0.709013	0.816554	0.602556	0.6137	1	0.762294	Nc73EF	0.800445	18C	1.44045	1.6596	1.44045
CG11661-RI	1	1	24	21	CG11661-RI	0.803852	0.826674	0.701263	0.9942	0.775814	1	0.709013	0.816554	0.602556	0.6137	1	0.762294	Nc73EF	0.800493	18C	1.426	1.6596	1.426
CG11665-RA	1	1	24	1	CG11665-RA	1	0.597503	0.724295	0.654042	0.825996	0.747893	0.566731	0.607825	1	0.720975	0.720857	0.885296	CG11665	0.754284	18C	1.76451	1.64521	1.64521
CG11668-RA	1	1	24	1	CG11668-RA	0.514265	0.126144	0.564928	0.338521	0.389799	1	0.536316	0.449705	0.176157	0.597799	1	0.061792	CG11668	0.479619	18C	7.92742	16.1833	7.92742
CG1167-RA	0.576952	1	24	21	CG1167-RA	1	0.554824	0.597831	0.783645	0.992583	0.74077	0.438352	0.577597	0.633513	0.992244	0.599382	1	Ras64B	0.742562	18C	2.28127	1.73131	1.73131
CG11678-RA	1	1	24	3	CG11678-RA	0.795946	1	0.913964	0.830638	0.919673	0.98149	0.809519	1	0.658085	0.62989	0.88206	0.666875	Arp6	0.840678	18C	1.25637	1.58758	1.25637
CG11679-RA	1	1	24	3	CG11679-RA	0.666068	1	0.865047	0.699248	0.870451	0.759246	0.846157	1	0.701264	0.872105	0.849855	0.98395	CG11679	0.842783	18C	1.50135	1.426	1.426
CG1168-RA	0.772187	1	24	13	CG1168-RA	0.886301	0.999995	0.964902	1	0.98197	0.811732	0.870756	1	0.804648	0.979921	0.945904	0.823741	7B2	0.922489	18C	1.23193	1.24278	1.23193
CG1168-RB	0.772187	1	24	13	CG1168-RB	0.886301	0.999995	0.964902	1	0.98197	0.811732	0.870756	1	0.804648	0.979921	0.945904	0.823741	7B2	0.922489	18C	1.23193	1.24278	1.23193
CG11680-RC	1	1	24	9	CG11680-RC	1	0.613226	0.448373	0.822827	0.541409	0.555578	1	0.47522	0.769991	0.633925	0.518361	0.602521	mle	0.665119	18C	2.23028	2.10429	2.10429
CG11686-RA	1	1	24	11	CG11686-RA	0.795473	1	0.7334	0.932714	0.866736	0.966759	0.465147	1	0.375922	0.507976	0.397513	0.434379	CG11686	0.706335	18C	2.14986	2.66013	2.14986
CG11695-RA	1	1	24	9	CG11695-RA	1	0.53324	0.95523	0.733389	0.288359	0.591811	0.63263	0.875267	1	0.68617	0.567675	0.881955	CG11695	0.728811	18C	3.4679	1.76157	1.76157
CG11696-RA	1	1	24	15	CG11696-RA	0.499949	0.834583	0.893541	0.799888	1	0.324054	1	0.539041	0.492687	0.943157	0.854596	0.51847	CG11696	0.724997	18C	3.08591	2.02969	2.02969
CG11699-RA	1	1	24	15	CG11699-RA	0.796246	0.774638	0.746914	1	0.952946	0.791621	0.888443	0.97793	0.844086	0.889035	1	0.738071	CG11699	0.866661	18C	1.33884	1.35488	1.33884
CG11709-RA	0.489949	1	24	17	CG11709-RA	0.752774	0.739706	0.910908	1	0.687449	0.617259	0.672863	0.82839	0.561726	1	0.987418	0.969054	PGRP-SA	0.810629	18C	1.62006	1.78023	1.62006
CG11710-RA	1	1	24	1	CG11710-RA	0.316634	0.517782	0.41408	0.52107	1	0.615702	1	0.439218	0.258074	0.179649	0.32556	0.482808	CG11710	0.505882	18C	3.15822	5.56641	3.15822
CG11710-RB	1	1	24	1	CG11710-RB	0.316634	0.517782	0.41408	0.52107	1	0.615702	1	0.439218	0.258074	0.179649	0.32556	0.482808	CG11710	0.505882	18C	3.15822	5.56641	3.15822
CG11711-RA	0.0729854	1	24	1	CG11711-RA	0.799347	0.658145	0.548261	0.459947	0.561395	1	0.91804	0.695752	0.76148	0.684762	0.994793	1	Mob2	0.756827	18C	2.17416	1.46036	1.46036
CG11711-RB	0.0729854	1	24	1	CG11711-RB	0.799347	0.658145	0.548261	0.459947	0.561395	1	0.91804	0.695752	0.76148	0.684762	0.994793	1	Mob2	0.756827	18C	2.17416	1.46036	1.46036
CG11711-RC	0.0729854	1	24	1	CG11711-RC	0.799347	0.658145	0.548261	0.459947	0.561395	1	0.91804	0.695752	0.76148	0.684762	0.994793	1	Mob2	0.756827	18C	2.17416	1.46036	1.46036
CG11711-RD	0.0729854	1	24	1	CG11711-RD	0.799347	0.658145	0.548261	0.459947	0.561395	1	0.91804	0.695752	0.76148	0.684762	0.994793	1	Mob2	0.756827	18C	2.17416	1.46036	1.46036
CG11715-RA	0.576952	1	24	17	CG11715-RA	0.773995	0.949268	0.93168	0.810554	1	0.769627	0.724741	0.74864	0.739488	1	0.772289	0.78244	Cyp4g15	0.83356	18C	1.3798	1.35229	1.35229
CG11715-RB	0.576952	1	24	17	CG11715-RB	0.773995	0.949268	0.93168	0.810554	1	0.769627	0.724741	0.74864	0.739488	1	0.772289	0.78244	Cyp4g15	0.83356	18C	1.3798	1.35229	1.35229
CG1172-RA	0.0120563	1	24	9	CG1172-RA	0.51922	0.839416	1	0.427228	0.178888	0	0.48788	1	0.489646	0.613529	0.231633	0.446568	CG1172	0.519501	18C	Inf	4.31717	4.31717
CG11722-RA	0.300911	1	24	17	CG11722-RA	0.504826	0.894321	0.630848	1	0.921181	0.618073	0.719004	0.89167	0.744954	0.831046	1	0.902312	CG11722	0.804853	18C	1.98088	1.34237	1.34237
CG11723-RA	1	1	24	3	CG11723-RA	0.514265	0.630722	0.739787	0.528939	0.243624	1	0.620893	0.881055	0.496116	0.698214	1	0.847433	CG11723	0.683421	18C	4.10468	2.01566	2.01566
CG11727-RB	1	1	24	1	CG11727-RB	0.289647	0.426286	1	0.333661	0.878179	0.675871	0.83287	0.173279	0.752297	0.289404	0.561921	1	Evi5	0.601118	18C	3.45247	5.77104	3.45247
CG11734-RB	1	1	24	21	CG11734-RB	0.954896	0.83399	0.749262	1	0.932148	0.956542	0.720983	0.745103	0.753389	1	0.434929	0.322501	HERC2	0.783645	18C	1.387	3.10076	1.387
CG11737-RA	1	1	24	13	CG11737-RA	0.550999	0.698299	0.922331	0.574277	0.835284	1	0.439831	1	0.4596	0.52057	0.442209	0.52464	CG11737	0.664003	18C	2.2736	2.26137	2.26137
CG11738-RA	1	1	24	13	CG11738-RA	0.628242	0.631818	0.808442	0.992515	1	0.439787	0.938599	0.893208	0.408199	1	0.297082	0.660863	l(1)G0004	0.724896	18C	2.27383	3.36607	2.27383
CG11739-RA	0.421631	1	24	21	CG11739-RA	0.735797	0.909818	0.750076	0.746867	1	0.908893	0.748077	0.736502	0.755138	0.897564	0.917261	1	CG11739	0.842166	18C	1.35907	1.35777	1.35777
CG11739-RB	0.141715	1	24	21	CG11739-RB	0.74786	0.926461	0.761907	0.77168	1	0.926485	0.748077	0.736502	0.755138	0.897564	0.917261	1	CG11739	0.849078	18C	1.33715	1.35777	1.33715
CG11739-RC	0.421631	1	24	21	CG11739-RC	0.735797	0.909818	0.750076	0.746867	1	0.908893	0.748077	0.736502	0.755138	0.897564	0.917261	1	CG11739	0.842166	18C	1.35907	1.35777	1.35777
CG11739-RD	0.421631	1	24	21	CG11739-RD	0.735797	0.909818	0.750076	0.746867	1	0.908893	0.748077	0.736502	0.755138	0.897564	0.917261	1	CG11739	0.842166	18C	1.35907	1.35777	1.35777
CG11741-RA	1	1	24	21	CG11741-RA	0.312511	0.638801	0.926361	1	0.263195	0.607685	0.815157	0.554372	0.332521	0.868023	1	0.599868	CG11741	0.659875	18C	3.79947	3.00733	3.00733
CG11750-RA	0.489949	1	24	9	CG11750-RA	1	0.817635	0.813715	0.883777	0.491279	0.216058	1	0.805233	0.677444	0.812163	0.261126	0.492867	Pa1	0.689275	18C	4.62839	3.82956	3.82956
CG11752-RA	1	1	24	13	CG11752-RA	0.957927	1	0.991714	0.981965	0.962242	0.862828	0.903908	0.941823	0.884589	0.932417	0.977743	1	CG11752	0.949763	18C	1.15898	1.13047	1.13047
CG11753-RA	1	1	24	13	CG11753-RA	0.525147	1	0.672306	0.682271	0.628495	0.349344	0.542461	0.682287	0.69043	0.662788	0.748057	1	CG11753	0.681965	18C	2.86251	1.50878	1.50878
CG11755-RA	1	1	24	15	CG11755-RA	0.226167	0.508536	0.295771	0.248129	1	0.293191	0.990565	0.0767778	1	0.769389	0.49796	0.221544	CG11755	0.510669	18C	4.42151	13.0246	4.42151
CG11759-RF	1	1	24	1	CG11759-RF	0.788181	1	0.789055	0.93926	0.92703	0.898441	1	0.390416	0.535264	0.710278	0.738539	0.187759	Kap3	0.742019	18C	1.26874	5.32598	1.26874
CG11759-RG	1	1	24	1	CG11759-RG	0.788181	1	0.789055	0.93926	0.92703	0.898441	1	0.390416	0.535264	0.710278	0.738539	0.187759	Kap3	0.742019	18C	1.26874	5.32598	1.26874
CG11759-RH	1	1	24	1	CG11759-RH	0.788181	1	0.789055	0.93926	0.92703	0.898441	1	0.390416	0.535264	0.710278	0.738539	0.187759	Kap3	0.742019	18C	1.26874	5.32598	1.26874
CG11760-RB	0.170207	1	24	15	CG11760-RB	0.765203	0.88328	0.953607	1	0.852945	0.700214	0.381697	0.391179	0.498003	1	0.519498	0.483752	CG11760	0.702448	18C	2.61988	2.55637	2.55637
CG11761-RA	1	1	24	15	CG11761-RA	0.819288	0.614055	1	0.749036	0.603748	0.177014	0.760854	0.519837	0.534527	0.823917	0.842882	1	trsn	0.703763	18C	5.64928	1.92368	1.92368
CG11765-RA	0.663955	1	24	11	CG11765-RA	0.418875	0.661291	1	0.61599	0.624858	0.623881	0.749554	0.814888	1	0.55585	0.647832	0.66696	Prx2540-2	0.698331	18C	2.38735	1.79905	1.79905
CG11770-RA	0.0931041	1	24	13	CG11770-RA	0.841377	0.573283	0.806898	1	0.531451	0.363572	0.624003	0.530465	1	0.683457	0.481664	0.2296	lin	0.638814	18C	2.75048	4.3554	2.75048
CG11771-RA	0.0931041	1	24	21	CG11771-RA	0.514265	0.441505	0.5044	0.930933	0.828323	1	0.791568	0.634878	0.746077	0.497715	1	0.756043	CG11771	0.720476	18C	2.26498	2.00918	2.00918
CG11777-RA	1	1	24	15	CG11777-RA	0.748022	0.923148	0.711662	0.746285	0.779598	1	0.0460987	0.121484	0.957697	1	0.748519	0.175272	CG11777	0.663149	18C	21.6926	8.23152	8.23152
CG11779-RA	1	1	24	9	CG11779-RA	1	0.817635	0.523102	0.548551	0.421096	0.648174	0.584884	0.688103	1	0.985067	0.803314	0.370633	CG11779	0.699213	18C	2.37476	2.69809	2.37476
CG11779-RB	1	1	24	13	CG11779-RB	0.771398	0.788403	0.524576	0.550097	0.584698	1	0.563616	0.663081	1	0.949246	0.774102	0.357155	CG11779	0.710531	18C	1.9063	2.7999	1.9063
CG11780-RA	0.141715	1	24	11	CG11780-RA	0.710826	1	0.754606	0.653697	0.2377	0.325228	0.689175	0.663608	0.861928	1	0.679576	0.571096	beta4GalT7	0.678953	18C	4.20698	1.75102	1.75102
CG11781-RA	0.576952	1	24	17	CG11781-RA	0.682522	0.668802	0.712218	0.851081	1	0.697796	0.828614	0.933336	0.740405	1	0.818537	0.886427	CG11781	0.818311	18C	1.49521	1.35061	1.35061
CG11783-RA	0.772187	1	24	1	CG11783-RA	0.771398	0.270309	0.172937	0.664952	0.278428	1	0.872763	1	0.754055	0.966309	0.745859	0.817563	Hr96	0.692881	18C	5.78245	1.34074	1.34074
CG11784-RA	0.170207	1	24	17	CG11784-RA	0.716729	0.697494	0.721318	1	0.797176	0.454466	0.790904	0.898655	0.719567	1	0.852225	0.719091	GstE13	0.780635	18C	2.20039	1.39064	1.39064
CG11785-RA	1	1	24	3	CG11785-RA	0.850826	0.840412	0.845068	0.846303	0.795925	1	0.837864	0.965784	0.803556	1	0.788954	0.861564	bai	0.869688	18C	1.2564	1.2675	1.2564
CG11788-RA	1	1	24	1	CG11788-RA	0.399984	0.595682	0.40352	0.658235	0.974497	1	1	0.0627455	0.215062	0.269473	0.0813901	0.120702	CG11788	0.481774	18C	2.5001	15.9374	2.5001
CG11790-RA	0.0931041	1	24	13	CG11790-RA	0.789799	0.858577	1	0.738486	0.986405	0.663178	0.706846	0.721819	0.837985	1	0.739983	0.582294	CG11790	0.802114	18C	1.50789	1.71735	1.50789
CG11790-RB	0.0931041	1	24	13	CG11790-RB	0.789799	0.858577	1	0.738486	0.986405	0.663178	0.706846	0.721819	0.837985	1	0.739983	0.582294	CG11790	0.802114	18C	1.50789	1.71735	1.50789
CG11791-RA	1	1	24	9	CG11791-RA	0.704734	0.665762	0.911656	0.658235	0.685757	1	0.927317	0.710687	1	0.705039	0.85313	0.629601	CG11791	0.78766	18C	1.51921	1.58831	1.51921
CG11791-RB	1	1	24	9	CG11791-RB	0.704734	0.665762	0.896711	0.611219	0.685757	1	0.927317	0.710687	1	0.705039	0.85313	0.629601	CG11791	0.782496	18C	1.63608	1.58831	1.58831
CG11791-RC	1	1	24	9	CG11791-RC	0.704734	0.665762	0.896711	0.611219	0.685757	1	0.927317	0.710687	1	0.705039	0.85313	0.629601	CG11791	0.782496	18C	1.63608	1.58831	1.58831
CG11793-RA	1	1	24	13	CG11793-RA	0.858096	1	0.983822	0.966339	0.997301	0.882061	0.774351	0.892193	0.80229	0.885546	0.800501	1	Sod	0.903542	18C	1.2914	1.24922	1.24922
CG11796-RA	1	1	24	3	CG11796-RA	0.711627	0.82211	0.66922	0.673268	1	0.792949	0.807619	1	0.728416	0.716905	0.670903	0.924209	CG11796	0.793102	18C	1.49428	1.49053	1.49053
CG11796-RB	1	1	24	3	CG11796-RB	0.711627	0.82211	0.66922	0.673268	1	0.792949	0.807619	1	0.728416	0.716905	0.670903	0.924209	CG11796	0.793102	18C	1.49428	1.49053	1.49053
CG11797-RA	1	1	24	21	CG11797-RA	0.868087	0.89166	0.732234	1	0.884169	0.886208	0.578643	0.909294	0.650426	0.630645	1	0.706194	Obp56a	0.811463	18C	1.72818	1.58568	1.58568
CG11798-RA	0.576952	1	24	3	CG11798-RA	1	0.651553	0.686572	0.46284	0.3553	0.607663	0.92054	0.0577597	0.316756	0.372091	0.449537	1	chn	0.573384	18C	2.81453	17.3131	2.81453
CG11798-RB	0.576952	1	24	3	CG11798-RB	1	0.651553	0.686572	0.46284	0.3553	0.607663	0.92054	0.0577597	0.316756	0.372091	0.449537	1	chn	0.573384	18C	2.81453	17.3131	2.81453
CG11798-RC	0.576952	1	24	3	CG11798-RC	1	0.651553	0.686572	0.46284	0.3553	0.607663	0.92054	0.0577597	0.316756	0.372091	0.449537	1	chn	0.573384	18C	2.81453	17.3131	2.81453
CG11798-RD	1	1	24	9	CG11798-RD	0.999265	0.745268	0.423825	1	0.30706	0.472644	1	0.553797	0.523628	0.587764	0.359178	0.293883	chn	0.605526	18C	3.25669	3.40271	3.25669
CG11799-RA	0.772187	1	24	21	CG11799-RA	0.6901	0.697015	0.700751	0.601235	1	0.710425	0.931752	0.211677	0.551402	1	0.658983	0.814397	fd68A	0.713978	18C	1.66324	4.72418	1.66324
CG11799-RB	0.772187	1	24	21	CG11799-RB	0.6901	0.697015	0.700751	0.601235	1	0.710425	0.931752	0.211677	0.551402	1	0.658983	0.814397	fd68A	0.713978	18C	1.66324	4.72418	1.66324
CG11799-RC	0.772187	1	24	21	CG11799-RC	0.6901	0.697015	0.700751	0.601235	1	0.710425	0.931752	0.211677	0.551402	1	0.658983	0.814397	fd68A	0.713978	18C	1.66324	4.72418	1.66324
CG11799-RD	0.772187	1	24	21	CG11799-RD	0.6901	0.697015	0.700751	0.601235	1	0.710425	0.931752	0.211677	0.551402	1	0.658983	0.814397	fd68A	0.713978	18C	1.66324	4.72418	1.66324
CG11799-RE	0.772187	1	24	21	CG11799-RE	0.6901	0.697015	0.700751	0.601235	1	0.710425	0.931752	0.211677	0.551402	1	0.658983	0.814397	fd68A	0.713978	18C	1.66324	4.72418	1.66324
CG11799-RF	0.772187	1	24	21	CG11799-RF	0.6901	0.697015	0.700751	0.601235	1	0.710425	0.931752	0.211677	0.551402	1	0.658983	0.814397	fd68A	0.713978	18C	1.66324	4.72418	1.66324
CG11802-RA	1	1	24	1	CG11802-RA	1	0.557478	0.689544	0.72309	0.976177	0.824949	1	0.512421	0.669081	0.768498	0.617208	0.692361	CG11802	0.752567	18C	1.79379	1.95152	1.79379
CG11804-RA	1	1	24	13	CG11804-RA	0.909367	0.745268	0.873584	1	0.708601	0.859353	0.835448	0.987254	0.910342	0.919285	0.7933	1	ced-6	0.878484	18C	1.41123	1.26056	1.26056
CG11804-RB	1	1	24	13	CG11804-RB	0.909367	0.745268	0.873584	1	0.708601	0.859353	0.835448	0.987254	0.910342	0.919285	0.7933	1	ced-6	0.878484	18C	1.41123	1.26056	1.26056
CG11804-RC	1	1	24	13	CG11804-RC	0.909367	0.745268	0.873584	1	0.708601	0.859353	0.835448	0.987254	0.910342	0.919285	0.7933	1	ced-6	0.878484	18C	1.41123	1.26056	1.26056
CG11807-RA	1	1	24	1	CG11807-RA	1	0.454242	0.69747	0.853302	0.280731	0.360097	0.876489	0.745103	0.868312	1	0.869857	0.87792	CG11807	0.740294	18C	3.56213	1.3421	1.3421
CG11808-RA	1	1	24	13	CG11808-RA	0.97139	0.876003	0.986382	0.987353	0.43311	1	0.91699	0.528621	0.491791	1	0.832634	0.326859	CG11808	0.779261	18C	2.30888	3.05942	2.30888
CG11811-RA	1	1	24	1	CG11811-RA	0.940502	0.865111	1	0.829948	0.96858	0.874656	0.487767	0.378064	0.842284	0.432979	0.576224	1	CG11811	0.766343	18C	2.05016	2.64506	2.05016
CG11814-RA	1	1	24	3	CG11814-RA	0.652288	1	0.418762	0.927062	0.337102	0.86481	0.969548	0.506607	0.762509	0.536048	1	0.889805	mv	0.738712	18C	2.96646	1.97392	1.97392
CG11820-RA	0.576952	1	24	9	CG11820-RA	1	0.752596	0.463659	0.785426	0.430666	0.618711	0.572639	0.704238	1	0.972159	0.440437	0.532214	PQBP1	0.689396	18C	2.32198	2.27047	2.27047
CG11822-RA	0.880418	1	24	13	CG11822-RA	0.721563	0.735553	1	0.740224	0.781321	0.72888	0.866428	0.989433	1	0.835337	0.880308	0.927273	nAChRbeta3	0.850527	18C	1.38588	1.19712	1.19712
CG11825-RA	1	1	24	21	CG11825-RA	0.46592	1	0.913964	0.575057	0	0.905991	0.407796	0.3224	0.221007	1	0.766701	0.723561	CG11825	0.608533	18C	Inf	4.52474	4.52474
CG11835-RA	1	1	24	15	CG11835-RA	0.510133	0.399124	0.441685	0.332906	1	0.0342057	0.33534	0.545829	0.712702	0.744183	0.674305	1	CG11835	0.560868	18C	29.2349	1.83207	1.83207
CG11837-RA	0.421631	1	24	15	CG11837-RA	0.540143	0.786671	0.794672	1	0.895593	0.26258	0.31913	0.770923	0.720643	0.40132	1	0.674095	CG11837	0.680481	18C	3.80836	2.49178	2.49178
CG11839-RA	0.209359	1	24	3	CG11839-RA	0.527724	0.24271	0.5176	0.108556	1	0.513085	1	0.292812	0.250905	0.20959	0.0949551	0.492867	CG11839	0.437567	18C	9.21181	10.5313	9.21181
CG11840-RA	1	1	24	1	CG11840-RA	0.959974	0.883022	1	0.544753	0.97227	0.804608	0.781336	0.644091	0.702272	0.722402	0.664437	1	Spp	0.806597	18C	1.83569	1.55258	1.55258
CG11841-RA	1	1	24	3	CG11841-RA	0.787469	0.962508	0.786023	0.925643	0.659816	1	0.821309	0.948381	0.763791	0.712153	1	0.691138	CG11841	0.838186	18C	1.51557	1.44689	1.44689
CG11842-RA	1	1	24	13	CG11842-RA	0.776456	0.755619	0.754939	1	0.831622	0.91903	0.764307	1	0.831357	0.893461	0.436982	0.491152	CG11842	0.78791	18C	1.32461	2.28842	1.32461
CG11843-RA	1	1	24	13	CG11843-RA	0.301985	1	0.521298	0.447267	0.228896	0.35233	1	0.0693502	0.380319	0.794237	0.314851	0.200111	CG11843	0.467554	18C	4.36879	14.4196	4.36879
CG11844-RA	0.576952	1	24	15	CG11844-RA	0.573427	0.734771	0.664839	1	0.908207	0.615769	1	0.62389	0.999059	0.889568	0.857833	0.820911	vig2	0.807356	18C	1.7439	1.60285	1.60285
CG11844-RB	0.421631	1	24	15	CG11844-RB	0.538331	0.655235	0.710405	1	0.803715	0.602701	1	0.62389	0.999059	0.889568	0.857833	0.820911	vig2	0.791804	18C	1.85759	1.60285	1.60285
CG11844-RC	0.576952	1	24	15	CG11844-RC	0.573427	0.734771	0.664839	1	0.908207	0.615769	1	0.62389	0.999059	0.889568	0.857833	0.820911	vig2	0.807356	18C	1.7439	1.60285	1.60285
CG11844-RD	0.576952	1	24	15	CG11844-RD	0.573427	0.734771	0.664839	1	0.908207	0.615769	1	0.62389	0.999059	0.889568	0.857833	0.820911	vig2	0.807356	18C	1.7439	1.60285	1.60285
CG11847-RA	1	1	24	13	CG11847-RA	0.40768	1	0.639775	0.701395	0.561837	0.360337	0.97144	0.756377	0.977174	0.812105	1	0.951364	Clbn	0.761624	18C	2.77518	1.32209	1.32209
CG11848-RA	0.772187	1	24	21	CG11848-RA	0.385699	0.236521	0.30264	0.95209	0.487249	1	1	0.101358	0.555852	0.580404	0.525905	0.487451	Bili	0.551264	18C	4.22796	9.86601	4.22796
CG11851-RA	1	1	24	3	CG11851-RA	0.274275	0.546626	0.699435	0.479571	0.194899	1	1	0.494121	0.383885	0.730946	0.598217	0.697055	CG11851	0.591586	18C	5.13085	2.60495	2.60495
CG11852-RA	0.300911	1	24	11	CG11852-RA	0.451753	1	0.821332	0.498642	0.960437	0.428509	0.330989	0.443649	1	0.274499	0.312124	0.253139	CG11852	0.564589	18C	3.02124	3.95041	3.02124
CG11853-RA	0.209359	1	24	23	CG11853-RA	0.701148	0.601947	0.146709	1	0.708601	0.454466	0.444526	0.453943	0.120457	0.262036	0.6933	1	to	0.548928	18C	6.81623	8.30174	6.81623
CG11856-RA	0.248511	1	24	15	CG11856-RA	0.829976	0.59985	0.976866	1	0.954883	0.864593	0.375686	0.40702	0.580651	1	0.342464	0.338584	Nup358	0.689214	18C	2.6618	2.95348	2.6618
CG11857-RA	1	1	24	1	CG11857-RA	0.707115	0.522317	0.76921	0.621503	0.822232	1	0.819638	1	0.658085	0.572628	0.648573	0.615577	CG11857	0.72974	18C	1.91455	1.74634	1.74634
CG11857-RB	1	1	24	3	CG11857-RB	0.707115	0.532172	0.76921	0.661174	0.822232	1	0.819638	1	0.658085	0.572628	0.648573	0.615577	CG11857	0.733867	18C	1.87909	1.74634	1.74634
CG11858-RA	0.209359	1	24	11	CG11858-RA	0.888818	0.912119	0.853976	1	0.618704	0.529079	0.549009	1	0.969916	0.784317	0.710671	0.78789	CG11858	0.800375	18C	1.89008	1.40712	1.40712
CG11859-RA	0.170207	1	24	7	CG11859-RA	0.25088	1	0.639775	0.464469	0	0.975683	0.885412	1	0.53317	0.556721	0.504446	0.801533	RIOK2	0.634341	18C	Inf	1.98237	1.98237
CG11861-RA	1	1	24	9	CG11861-RA	0.871591	1	0.904509	0.532093	0.586054	0.601391	0.752449	0.630934	0.617869	1	0.954817	0.664653	Cul3	0.759697	18C	1.87937	1.61847	1.61847
CG11861-RB	1	1	24	9	CG11861-RB	0.871591	1	0.904509	0.532093	0.586054	0.601391	0.752449	0.630934	0.617869	1	0.954817	0.664653	Cul3	0.759697	18C	1.87937	1.61847	1.61847
CG11861-RC	1	1	24	9	CG11861-RC	0.871591	1	0.904509	0.532093	0.586054	0.601391	0.752449	0.630934	0.607571	1	0.96456	0.664653	Cul3	0.75965	18C	1.87937	1.6459	1.6459
CG11866-RA	1	1	24	3	CG11866-RA	0.652288	1	0.383865	0.6709	0.721024	0.634194	0.263011	0.450526	0.760216	0.347285	0.404583	1	dmpd	0.607324	18C	3.80212	2.87948	2.87948
CG11870-RA	1	1	24	13	CG11870-RA	0.633268	0.647228	0.579712	0.651338	1	0.410468	0.738068	0.972519	1	0.722888	0.388154	0.719544	CG43143	0.705266	18C	2.43624	2.5763	2.43624
CG11870-RB	1	1	24	13	CG11870-RB	0.633268	0.647228	0.579712	0.651338	1	0.410468	0.738068	0.972519	1	0.722888	0.388154	0.719544	CG43143	0.705266	18C	2.43624	2.5763	2.43624
CG11870-RC	1	1	24	13	CG11870-RC	0.633268	0.647228	0.579712	0.651338	1	0.410468	0.738068	0.972519	1	0.722888	0.388154	0.719544	CG43143	0.705266	18C	2.43624	2.5763	2.43624
CG11870-RD	1	1	24	13	CG11870-RD	0.633268	0.647228	0.496896	0.651338	1	0.410468	0.738068	0.972519	1	0.722888	0.388154	0.719544	CG43143	0.698364	18C	2.43624	2.5763	2.43624
CG11872-RA	0.0931041	1	24	7	CG11872-RA	0.767397	1	0.677408	0.789294	0.181771	0.373055	0.948945	0.937786	1	0.372918	0.743384	0.801778	CG43143	0.716145	18C	5.50144	2.68155	2.68155
CG11874-RA	0.141715	1	24	15	CG11874-RA	0.472174	0.88568	0.632017	0.845596	1	0.756125	0.45933	0.605238	1	0.799791	0.684431	0.522435	alpha-Man-Ib	0.721901	18C	2.17709	1.91411	1.91411
CG11876-RA	1	1	24	1	CG11876-RA	0.837755	1	0.853901	0.813543	0.858187	0.751613	0.831289	0.809454	0.737158	0.772246	1	0.875886	CG11876	0.845086	18C	1.33047	1.35656	1.33047
CG11876-RB	1	1	24	1	CG11876-RB	0.791585	0.809035	0.807456	0.796079	1	0.701216	0.831983	0.811002	0.735335	0.772456	1	0.87756	CG11876	0.827809	18C	1.42609	1.35992	1.35992
CG11876-RC	1	1	24	1	CG11876-RC	0.791585	0.809035	0.807456	0.796079	1	0.701216	0.831983	0.811002	0.735335	0.772456	1	0.87756	CG11876	0.827809	18C	1.42609	1.35992	1.35992
CG11876-RD	1	1	24	1	CG11876-RD	0.837755	1	0.853901	0.813543	0.858187	0.751613	0.831289	0.809454	0.737158	0.772246	1	0.875886	CG11876	0.845086	18C	1.33047	1.35656	1.33047
CG11877-RA	1	1	24	15	CG11877-RA	1	0.589641	0.30179	0.886121	0.510174	0.523525	0.437692	0.305326	1	0.849907	0.660087	0.554718	Atg14	0.634915	18C	3.31357	3.27519	3.27519
CG11880-RA	1	1	24	9	CG11880-RA	0.894825	0.598615	1	0.557793	0.770742	0.685457	1	0.36529	0.563419	0.550953	0.575371	0.263513	CG11880	0.652165	18C	1.79278	3.79488	1.79278
CG11880-RB	1	1	24	9	CG11880-RB	0.894825	0.598615	1	0.557793	0.770742	0.685457	1	0.36529	0.563419	0.550953	0.575371	0.263513	CG11880	0.652165	18C	1.79278	3.79488	1.79278
CG11880-RC	1	1	24	9	CG11880-RC	0.894825	0.598615	1	0.557793	0.770742	0.685457	1	0.36529	0.563419	0.550953	0.575371	0.263513	CG11880	0.652165	18C	1.79278	3.79488	1.79278
CG11882-RA	0.209359	1	24	13	CG11882-RA	0.648172	0.944006	0.953607	1	0.614121	0.472644	0.415163	0.227934	1	0.326303	0.709594	0.0438472	CG11882	0.612949	18C	2.40869	22.8065	2.40869
CG11883-RA	1	1	24	13	CG11883-RA	0.729193	0.983753	0.53402	1	0.644827	0.945288	0.321968	1	0.540095	0.845927	0.648573	0.291466	CG11883	0.707093	18C	3.1059	3.43093	3.1059
CG11883-RB	1	1	24	13	CG11883-RB	0.729193	0.983753	0.53402	1	0.644827	0.945288	0.321968	1	0.540095	0.845927	0.648573	0.291466	CG11883	0.707093	18C	3.1059	3.43093	3.1059
CG11883-RC	1	1	24	13	CG11883-RC	0.729193	0.983753	0.53402	1	0.644827	0.945288	0.321968	1	0.540095	0.845927	0.648573	0.291466	CG11883	0.707093	18C	3.1059	3.43093	3.1059
CG11885-RA	0.0931041	1	24	9	CG11885-RA	0.783757	1	0.872871	0.60329	0.598857	0.442461	0.838388	0.793123	1	0.557567	0.753226	0.830969	CG11885	0.756209	18C	2.26009	1.79351	1.79351
CG11886-RA	1	1	24	21	CG11886-RA	0.514265	0.537969	0.80704	0.672064	0.286617	1	0.984536	0.474005	0.906392	1	0.889921	0.911834	Slbp	0.74872	18C	3.48898	2.10968	2.10968
CG11887-RA	1	1	24	3	CG11887-RA	0.428554	0.683282	0.470773	0.387889	0.812081	1	0.430057	1	0.479853	0.739644	0.259429	0.416797	Elp2	0.592363	18C	2.57806	3.85461	2.57806
CG11891-RD	0.00438993	0.831714	24	21	CG11891-RD	0.734224	0.267333	0.630122	0.698536	1	0.713857	0.566977	0.460964	0.130756	0.603014	1	0.85617	CG11891	0.638496	18C	3.74065	7.64784	3.74065
CG11891-RE	0.00438993	0.831714	24	21	CG11891-RE	0.734224	0.267333	0.630122	0.698536	1	0.713857	0.566977	0.460964	0.130756	0.603014	1	0.85617	CG11891	0.638496	18C	3.74065	7.64784	3.74065
CG11892-RA	1	1	24	21	CG11892-RA	0.151915	0.652109	0.119201	1	0.575738	0.886208	0.473421	0.138623	0.997783	0.0992244	0.539444	1	CG11892	0.552806	18C	8.3892	10.0782	8.3892
CG11892-RB	1	1	24	21	CG11892-RB	0.151915	0.652109	0.119201	1	0.575738	0.886208	0.473421	0.138623	0.997783	0.0992244	0.539444	1	CG11892	0.552806	18C	8.3892	10.0782	8.3892
CG11893-RA	0.421631	1	24	1	CG11893-RA	0.61152	1	0.159944	0.33545	0.386263	0.792742	0.315614	0	0.14254	0.744183	0.539444	1	CG11893	0.502308	18C	6.2522	Inf	6.2522
CG11895-RA	1	1	24	21	CG11895-RA	0.489216	1	0.25591	0.33545	0.30901	0.317097	0.445769	0.440527	0.100661	0.893414	1	0.847433	stan	0.536207	18C	3.90763	9.93431	3.90763
CG11896-RA	0.772187	1	24	1	CG11896-RA	0.642832	0.262801	0.571653	0.493677	0.568457	1	1	0.847064	0.580666	0.628771	0.935986	0.573335	m-cup	0.675437	18C	3.80516	1.74418	1.74418
CG11897-RA	0.300911	1	24	9	CG11897-RA	0.553829	1	0.675988	0.607607	0.932861	0.598296	1	0.823534	0.693574	0.538947	0.47308	0.339475	CG11897	0.686433	18C	1.80561	2.94573	1.80561
CG11897-RB	0.300911	1	24	9	CG11897-RB	0.553829	1	0.675988	0.607607	0.932861	0.598296	1	0.823534	0.693574	0.538947	0.47308	0.339475	CG11897	0.686433	18C	1.80561	2.94573	1.80561
CG11899-RA	0.0931041	1	24	21	CG11899-RA	0.815805	0.883294	0.812157	0.830692	1	0.941895	0.575075	0.751372	0.655861	0.899411	0.896867	1	CG11899	0.838536	18C	1.7389	1.52471	1.52471
CG11900-RA	1	1	24	21	CG11900-RA	0.555927	1	0.523452	0.609909	0.772525	0.648607	1	0	0.548407	0.774736	0.610425	0.452633	Mesh1	0.624718	18C	1.91039	Inf	1.91039
CG11901-RA	1	1	24	21	CG11901-RA	0.86966	0.843827	0.876731	1	0.886553	0.860521	0.750752	1	0.667386	0.80898	0.837145	0.920409	Ef1gamma	0.860164	18C	1.332	1.49838	1.332
CG11901-RB	1	1	24	21	CG11901-RB	0.86966	0.843827	0.876731	1	0.886553	0.860521	0.750752	1	0.667386	0.80898	0.837145	0.920409	Ef1gamma	0.860164	18C	1.332	1.49838	1.332
CG11902-RA	0.353312	1	24	1	CG11902-RA	0.440799	0.315361	0.230583	0.241801	0.278428	1	0.315614	0.103967	0.380108	0.372091	0.337153	1	CG11902	0.417992	18C	4.33684	9.61839	4.33684
CG11906-RA	1	1	24	15	CG11906-RA	0.238959	0.341917	1	0.327703	0.754685	0.309774	0.771105	0.0635031	0.52238	1	0.494237	0.549718	CG11906	0.531165	18C	4.18482	15.7473	4.18482
CG11907-RA	0.772187	1	24	11	CG11907-RA	0.669085	0.703373	1	0.83892	0.543373	0.619548	1	0.896389	0.863689	0.77674	0.985788	0.721648	Ent1	0.801546	18C	1.84036	1.38572	1.38572
CG11907-RB	0.772187	1	24	11	CG11907-RB	0.669085	0.703373	1	0.83892	0.543373	0.619548	1	0.896389	0.863689	0.77674	0.985788	0.721648	Ent1	0.801546	18C	1.84036	1.38572	1.38572
CG11909-RA	1	1	24	3	CG11909-RA	0.790142	1	0.945371	0.751592	0.658372	0.533943	0.356161	0.657017	0.57907	0.480618	0.842882	1	tobi	0.716264	18C	2.80772	2.08065	2.08065
CG11910-RA	0.421631	1	24	3	CG11910-RA	0.905554	0.877526	0.877217	0.873899	0.974497	1	1	0.595352	0.66319	0.535813	0.550802	0.648423	alrm	0.791856	18C	1.1443	1.86632	1.1443
CG11915-RA	1	1	24	9	CG11915-RA	1	0.520313	0.475547	0.448815	0.459377	0.412474	0.656156	0.734899	0.553166	0.546657	1	0.318777	Lmpt	0.593849	18C	2.42439	3.13699	2.42439
CG11920-RA	0.576952	1	24	15	CG11920-RA	0.43977	0.647228	0.690133	0.796079	1	0.684113	0.725447	0.808829	0.856887	1	0.286137	0.565792	CG11920	0.708368	18C	2.27392	3.49483	2.27392
CG11924-RA	1	1	24	15	CG11924-RA	0.633268	0.345188	0.358869	0.665812	1	0.410468	0.350273	1	0.421849	0.495543	0.498902	0.258957	Cf2	0.536594	18C	2.89697	3.86165	2.89697
CG11924-RB	1	1	24	15	CG11924-RB	0.633268	0.345188	0.358869	0.665812	1	0.410468	0.350273	1	0.421849	0.495543	0.498902	0.258957	Cf2	0.536594	18C	2.89697	3.86165	2.89697
CG11924-RC	1	1	24	15	CG11924-RC	0.633268	0.345188	0.358869	0.665812	1	0.410468	0.350273	1	0.421849	0.495543	0.498902	0.258957	Cf2	0.536594	18C	2.89697	3.86165	2.89697
CG11926-RA	1	1	24	15	CG11926-RA	0.461758	0.768583	0.647	0.542781	1	0.384814	0.61286	0.70334	1	0.540731	0.760279	0.801778	Mon1	0.685327	18C	2.59866	1.84935	1.84935
CG11927-RA	0.300911	1	24	3	CG11927-RA	0.816774	0.834779	0.688358	0.672064	0.802527	1	1	0.858008	0.882253	0.877355	0.73535	0.884213	CG11927	0.83764	18C	1.48795	1.3599	1.3599
CG1193-RA	1	1	24	5	CG1193-RA	0.701271	0.68806	0.40352	0.46162	0.354363	1	0.530135	0.232845	0.478849	1	0.151017	0	kat-60L1	0.50014	18C	2.82197	Inf	2.82197
CG1193-RB	1	1	24	5	CG1193-RB	0.701271	0.68806	0.40352	0.46162	0.354363	1	0.530135	0.232845	0.478849	1	0.151017	0	kat-60L1	0.50014	18C	2.82197	Inf	2.82197
CG11943-RA	1	1	24	5	CG11943-RA	0.584122	0.781525	1	0.961263	0.402499	0.929322	0.264741	1	0.334781	0.299631	0.0904986	0.738156	Nup205	0.615545	18C	3.77728	11.0499	3.77728
CG11943-RB	1	1	24	5	CG11943-RB	0.584122	0.781525	1	0.961263	0.402499	0.929322	0.264741	1	0.334781	0.299631	0.0904986	0.738156	Nup205	0.615545	18C	3.77728	11.0499	3.77728
CG11949-RA	1	1	24	15	CG11949-RA	0.894798	0.712509	0.764981	1	0.708601	0.753114	0.91699	0.755172	0.90593	1	0.838756	0.826228	cora	0.839757	18C	1.41123	1.3242	1.3242
CG11949-RB	1	1	24	15	CG11949-RB	0.894798	0.720698	0.77546	1	0.708601	0.753114	0.91699	0.755172	0.90593	1	0.838756	0.826228	cora	0.841312	18C	1.41123	1.3242	1.3242
CG11949-RC	1	1	24	15	CG11949-RC	0.894798	0.720698	0.77546	1	0.708601	0.753114	0.91699	0.755172	0.90593	1	0.838756	0.826228	cora	0.841312	18C	1.41123	1.3242	1.3242
CG11949-RD	1	1	24	15	CG11949-RD	0.894798	0.720698	0.77546	1	0.708601	0.753114	0.91699	0.755172	0.90593	1	0.838756	0.826228	cora	0.841312	18C	1.41123	1.3242	1.3242
CG11951-RA	0.421631	1	24	9	CG11951-RA	1	0.823014	0.474922	0.51968	0.398933	0.409373	0.855488	0.48626	1	0.648652	0.458727	0.616518	CG11951	0.640964	18C	2.50669	2.17994	2.17994
CG11956-RA	1	1	24	9	CG11956-RA	1	0.919839	0.797731	0.932537	0.947466	0.550948	1	0.31703	0.95759	0.872243	0.616851	0.686096	SP1029	0.799861	18C	1.81505	3.15428	1.81505
CG11956-RB	1	1	24	9	CG11956-RB	1	0.889178	0.797731	0.932537	0.947466	0.550948	1	0.31703	0.95759	0.872243	0.616851	0.686096	SP1029	0.797306	18C	1.81505	3.15428	1.81505
CG11956-RC	1	1	24	9	CG11956-RC	1	0.919839	0.797731	0.932537	0.947466	0.550948	1	0.31703	0.95759	0.872243	0.616851	0.686096	SP1029	0.799861	18C	1.81505	3.15428	1.81505
CG11958-RA	1	1	24	21	CG11958-RA	0.728542	0.696422	0.638907	0.758146	0.548155	1	0.776709	0.877229	0.668161	1	0.958782	0.609378	Cnx99A	0.771703	18C	1.8243	1.64102	1.64102
CG11958-RB	1	1	24	21	CG11958-RB	0.728542	0.696422	0.638907	0.758146	0.548155	1	0.776709	0.877229	0.668161	1	0.958782	0.609378	Cnx99A	0.771703	18C	1.8243	1.64102	1.64102
CG11958-RC	1	1	24	21	CG11958-RC	0.728542	0.696422	0.638907	0.758146	0.548155	1	0.776709	0.877229	0.668161	1	0.958782	0.609378	Cnx99A	0.771703	18C	1.8243	1.64102	1.64102
CG11958-RD	1	1	24	21	CG11958-RD	0.675892	0.549629	0.66869	0.725402	0.529013	1	0.776709	0.877229	0.668161	1	0.958782	0.609378	Cnx99A	0.75324	18C	1.89031	1.64102	1.64102
CG11961-RA	0.0931041	1	24	13	CG11961-RA	0.520852	0.766561	0.790131	1	0.789584	0.607685	0.648991	0.880298	1	0.684112	0.530156	0.665268	CG11961	0.740303	18C	1.91993	1.88624	1.88624
CG11961-RB	0.0931041	1	24	13	CG11961-RB	0.520852	0.766561	0.790131	1	0.789584	0.607685	0.648991	0.880298	1	0.684112	0.530156	0.665268	CG11961	0.740303	18C	1.91993	1.88624	1.88624
CG11963-RA	1	1	24	13	CG11963-RA	0.675179	0.828075	0.423825	1	0.255884	0.26258	0.642167	1	0.909612	0.605664	0.773299	0.684386	skap	0.671723	18C	3.90803	1.65108	1.65108
CG11963-RB	1	1	24	13	CG11963-RB	0.675179	0.828075	0.423825	1	0.255884	0.26258	0.642167	1	0.909612	0.605664	0.773299	0.684386	skap	0.671723	18C	3.90803	1.65108	1.65108
CG11964-RA	0.663955	1	24	13	CG11964-RA	0.675179	0.745268	0.741694	1	0.255884	0.26258	0.954242	0.523901	0.7901	1	0.339788	0.571096	CG11964	0.654978	18C	3.90803	2.94301	2.94301
CG11967-RA	0.576952	1	24	1	CG11967-RA	0.808131	0.540619	0.360286	0.664952	0.243624	1	0.665135	0.957567	0.3894	0.383366	1	0.608814	CAHbeta	0.635158	18C	4.10468	2.60847	2.60847
CG11968-RA	0.0214013	1	24	23	CG11968-RA	0.699401	0.693794	0.532646	0.55856	0.857558	1	0.859325	0.505918	0.644075	0.741501	1	0.834192	RagA-B	0.743914	18C	1.87742	1.9766	1.87742
CG11971-RA	0.248511	1	24	15	CG11971-RA	0.552419	0.745268	0.606841	1	0.209359	0.214838	0.111607	0.882359	0.957697	1	0.429206	0.919412	E(var)3-9	0.635751	18C	8.95999	2.32988	2.32988
CG11975-RA	1	1	24	13	CG11975-RA	0.828629	0.609765	0.780224	1	0.314039	0.429677	0.445916	0.769911	1	0.623602	0.670172	0.974382	CG11975	0.70386	18C	3.18432	1.60359	1.60359
CG11979-RA	0.880418	1	24	17	CG11979-RA	0.402075	0.662638	0.72957	0.765063	1	0.488652	0.576832	0.977226	0.967624	0.652851	1	0.793723	Rpb5	0.751354	18C	2.4871	1.53174	1.53174
CG11980-RA	1	1	24	13	CG11980-RA	0.613801	0.681587	0.885141	0.955503	0.785885	1	0.589496	0.966204	1	0.81364	0.663516	0.892889	CG11980	0.820638	18C	1.69636	1.50712	1.50712
CG11980-RB	1	1	24	13	CG11980-RB	0.613801	0.681587	0.885141	0.955503	0.785885	1	0.589496	0.966204	1	0.81364	0.663516	0.892889	CG11980	0.820638	18C	1.69636	1.50712	1.50712
CG11980-RC	1	1	24	13	CG11980-RC	0.613801	0.681587	0.885141	0.955503	0.785885	1	0.589496	0.966204	1	0.81364	0.663516	0.892889	CG11980	0.820638	18C	1.69636	1.50712	1.50712
CG11981-RA	1	1	24	15	CG11981-RA	0.753437	0.871418	0.962861	0.816134	1	0.760355	0.639458	0.604278	1	0.693271	0.73195	0.857911	Prosbeta3	0.807589	18C	1.56382	1.65487	1.56382
CG11982-RA	1	1	24	13	CG11982-RA	0.518182	0.781525	1	0.875796	0.716536	0.544658	0.814694	0.718474	0.556255	0.726032	0.756538	1	CG11982	0.750724	18C	1.92982	1.79774	1.79774
CG11984-RA	1	1	24	9	CG11984-RA	0.654519	0.645057	0.623622	0.500088	0.708725	1	0.255485	0.392748	1	0.481925	0.436673	0.215863	CG11984	0.576225	18C	3.91412	4.63256	3.91412
CG11984-RB	1	1	24	9	CG11984-RB	0.654519	0.645057	0.623622	0.500088	0.708725	1	0.255485	0.392748	1	0.481925	0.436673	0.215863	CG11984	0.576225	18C	3.91412	4.63256	3.91412
CG11984-RC	1	1	24	9	CG11984-RC	0.654519	0.645057	0.623622	0.500088	0.708725	1	0.255485	0.392748	1	0.481925	0.436673	0.215863	CG11984	0.576225	18C	3.91412	4.63256	3.91412
CG11985-RA	1	1	24	13	CG11985-RA	0.432115	0.761829	0.826459	1	0.562944	0.682708	0.838467	0.536316	1	0.50673	0.535674	0.577752	CG11985	0.688416	18C	2.3142	1.97344	1.97344
CG11986-RA	1	1	24	21	CG11986-RA	0.527724	0.593292	0.276053	0.434225	1	0.855142	0.151467	0.698534	0.205221	1	0.453051	0.959825	CG11986	0.596211	18C	6.6021	4.8728	4.8728
CG11987-RA	1	1	24	3	CG11987-RA	0.514265	0.516045	0.440204	0.673195	0.531544	1	1	0.872946	0.835514	0.837052	0.52344	0.506949	tgo	0.687596	18C	2.27168	1.97259	1.97259
CG11988-RA	0.353312	1	24	7	CG11988-RA	1	0.858517	0.549257	0.822827	0.378986	0.972261	1	0.802051	0.824714	0.574095	0.483032	0.220413	neur	0.707179	18C	2.63862	4.53695	2.63862
CG11988-RB	0.353312	1	24	7	CG11988-RB	1	0.858517	0.549257	0.822827	0.378986	0.972261	1	0.802051	0.824714	0.574095	0.483032	0.220413	neur	0.707179	18C	2.63862	4.53695	2.63862
CG11988-RC	0.353312	1	24	7	CG11988-RC	1	0.858517	0.549257	0.822827	0.378986	0.972261	1	0.802051	0.824714	0.574095	0.483032	0.220413	neur	0.707179	18C	2.63862	4.53695	2.63862
CG11988-RD	0.353312	1	24	7	CG11988-RD	1	0.858517	0.549257	0.822827	0.378986	0.972261	1	0.802051	0.824714	0.574095	0.483032	0.220413	neur	0.707179	18C	2.63862	4.53695	2.63862
CG11989-RD	1	1	24	21	CG11989-RD	0.699972	0.709562	0.582862	0.611219	0.839151	1	0.618928	1	0.805302	0.847822	0.680057	0.961839	vnc	0.779726	18C	1.71567	1.47046	1.47046
CG11989-RE	1	1	24	21	CG11989-RE	0.699972	0.709562	0.582862	0.611219	0.839151	1	0.618928	1	0.805302	0.847822	0.680057	0.961839	vnc	0.779726	18C	1.71567	1.47046	1.47046
CG11990-RA	0.421631	1	24	3	CG11990-RA	0.837495	0.870842	1	0.62919	0.482998	0.991277	0.841637	0.785532	0.681026	0.611884	0.779197	1	hyx	0.79259	18C	2.0704	1.6343	1.6343
CG11990-RB	0.421631	1	24	3	CG11990-RB	0.837495	0.870842	1	0.62919	0.482998	0.991277	0.841637	0.785532	0.681026	0.611884	0.779197	1	hyx	0.79259	18C	2.0704	1.6343	1.6343
CG11992-RA	1	1	24	1	CG11992-RA	0.845629	0.736904	0.728382	0.983546	1	0.593448	0.971311	0.671182	0.683382	0.536942	0.58895	1	Rel	0.778306	18C	1.68507	1.8624	1.68507
CG11992-RB	1	1	24	1	CG11992-RB	0.871062	0.744702	0.733371	0.988778	1	0.593448	0.971311	0.671182	0.683382	0.536942	0.58895	1	Rel	0.781927	18C	1.68507	1.8624	1.68507
CG11992-RC	1	1	24	1	CG11992-RC	0.871062	0.744702	0.733371	0.988778	1	0.593448	0.971311	0.671182	0.683382	0.536942	0.58895	1	Rel	0.781927	18C	1.68507	1.8624	1.68507
CG11992-RD	1	1	24	1	CG11992-RD	0.871062	0.744702	0.733371	0.988778	1	0.593448	0.971311	0.671182	0.683382	0.536942	0.58895	1	Rel	0.781927	18C	1.68507	1.8624	1.68507
CG11993-RA	0.141715	1	24	11	CG11993-RA	0.892114	0.703373	1	0.314595	0.482998	0.247819	0.653518	1	0.609338	0.89473	0.324287	0.427484	Mst85C	0.629188	18C	4.0352	3.08369	3.08369
CG11999-RA	1	1	24	15	CG11999-RA	0.911492	0.882554	0.815585	1	0.90906	0.777375	0.752235	0.612608	0.990884	0.778453	1	0.609093	CG11999	0.836612	18C	1.32937	1.64179	1.32937
CG1200-RA	0.209359	1	24	21	CG1200-RA	0.36189	0.560642	0.687478	0.564202	0.902312	1	0.956136	0.474005	0.666968	1	0.978913	0.791856	Aplip1	0.745367	18C	2.76327	2.10968	2.10968
CG1200-RB	0.209359	1	24	21	CG1200-RB	0.36189	0.560642	0.687478	0.564202	0.902312	1	0.956136	0.474005	0.666968	1	0.978913	0.791856	Aplip1	0.745367	18C	2.76327	2.10968	2.10968
CG12000-RA	1	1	24	15	CG12000-RA	0.851398	1	0.883667	0.689433	0.973126	0.83216	0.708463	0.650463	1	0.736374	0.841981	0.766999	Prosbeta7	0.827839	18C	1.45047	1.53737	1.45047
CG12000-RB	1	1	24	15	CG12000-RB	0.851398	1	0.883667	0.689433	0.973126	0.83216	0.708463	0.650463	1	0.736374	0.841981	0.766999	Prosbeta7	0.827839	18C	1.45047	1.53737	1.45047
CG12002-RA	1	1	24	21	CG12002-RA	0.599976	0.657002	0.829458	0.95209	0.86622	1	0.729508	1	0.680191	0.549323	0.693823	0.879822	Pxn	0.786451	18C	1.66673	1.82042	1.66673
CG12002-RC	1	1	24	21	CG12002-RC	0.599976	0.657002	0.829458	0.95209	0.86622	1	0.729508	1	0.680191	0.549323	0.693823	0.879822	Pxn	0.786451	18C	1.66673	1.82042	1.66673
CG12002-RD	1	1	24	21	CG12002-RD	0.599976	0.657002	0.829458	0.95209	0.86622	1	0.729508	1	0.680191	0.549323	0.693823	0.879822	Pxn	0.786451	18C	1.66673	1.82042	1.66673
CG12002-RE	1	1	24	21	CG12002-RE	0.599976	0.657002	0.829458	0.95209	0.86622	1	0.729508	1	0.680191	0.549323	0.693823	0.879822	Pxn	0.786451	18C	1.66673	1.82042	1.66673
CG12004-RA	0.421631	1	24	3	CG12004-RA	0.428554	0.700802	0.40352	0.340872	0.676734	1	1	0.749255	0.726149	0.536305	0.56973	0.583985	CG12004	0.642992	18C	2.93365	1.86461	1.86461
CG12004-RB	0.421631	1	24	3	CG12004-RB	0.428554	0.700802	0.40352	0.340872	0.676734	1	1	0.749255	0.726149	0.536305	0.56973	0.583985	CG12004	0.642992	18C	2.93365	1.86461	1.86461
CG12004-RC	1	1	24	13	CG12004-RC	0.527724	0.83215	0.946469	0.651338	1	0.732979	0.667577	0.638167	0.82764	1	0.335593	0.464508	CG12004	0.718679	18C	1.89493	2.9798	1.89493
CG12005-RB	1	1	24	13	CG12005-RB	0.746016	0.891944	0.730839	0.784555	0.886667	1	0.277068	1	0.968412	0.329488	0.648573	0.687028	Mms19	0.745882	18C	3.60923	3.03501	3.03501
CG12006-RA	1	1	24	13	CG12006-RA	0.690326	0.439608	1	0.742794	0.352186	0.929322	0.382214	0.538359	1	0.571808	0.66454	0.952111	CG12006	0.688606	18C	2.83941	1.8575	1.8575
CG12006-RB	1	1	24	13	CG12006-RB	0.690326	0.439608	1	0.742794	0.352186	0.929322	0.382214	0.538359	1	0.571808	0.66454	0.952111	CG12006	0.688606	18C	2.83941	1.8575	1.8575
CG12007-RA	1	1	24	21	CG12007-RA	1	0.678929	0.728607	0.822827	0.338381	0.48613	0.376585	0.567095	0.210571	0.811836	0.750931	1	CG12007	0.647658	18C	2.95525	4.74899	2.95525
CG12008-RA	0.489949	1	24	5	CG12008-RA	1	0.391783	0.370531	0.685689	0.315822	0.648174	1	0.533336	0.387111	0.516491	0.305213	0.422457	kst	0.548051	18C	3.16634	3.2764	3.16634
CG12008-RB	0.489949	1	24	5	CG12008-RB	1	0.391783	0.370531	0.685689	0.315822	0.648174	1	0.533336	0.387111	0.516491	0.305213	0.422457	kst	0.548051	18C	3.16634	3.2764	3.16634
CG12008-RC	0.489949	1	24	5	CG12008-RC	1	0.391783	0.370531	0.685689	0.315822	0.648174	1	0.533336	0.387111	0.516491	0.305213	0.422457	kst	0.548051	18C	3.16634	3.2764	3.16634
CG12008-RE	0.489949	1	24	5	CG12008-RE	1	0.391783	0.370531	0.685689	0.315822	0.648174	1	0.533336	0.387111	0.516491	0.305213	0.422457	kst	0.548051	18C	3.16634	3.2764	3.16634
CG12012-RA	0.576952	1	24	3	CG12012-RA	1	0.662284	0.627723	0.42787	0.909567	0.85559	0.522798	0.688868	1	0.319052	0.63075	0.974382	CG12012	0.71824	18C	2.33716	3.13428	2.33716
CG12014-RA	0.772187	1	24	3	CG12014-RA	1	0.363393	0.116245	0.152375	0.631644	0.216058	0.456809	0.766076	0.675191	0.391675	0.425877	1	CG12014	0.516279	18C	8.60253	2.55314	2.55314
CG12016-RB	1	1	24	21	CG12016-RB	0.917225	0.703083	0.953607	1	0.673505	0.758014	0.762997	0.861743	0.626531	1	0.872228	0.948164	CG12016	0.839758	18C	1.48477	1.59609	1.48477
CG12018-RA	0.880418	1	24	15	CG12018-RA	0.579295	0.994668	1	0.571991	0.878179	0.675871	0.307528	0.648346	1	0.928152	0.893562	0.935407	CG12018	0.784417	18C	3.25173	1.54239	1.54239
CG12019-RA	0.576952	1	24	11	CG12019-RA	0.689242	0.701778	1	0.984447	0.566784	0.809206	0.846734	1	0.94611	0.7217	0.841537	0.77901	Cdc37	0.823879	18C	1.76434	1.38562	1.38562
CG12021-RA	1	1	24	15	CG12021-RA	0.527724	0.672121	0.41408	0.601235	1	0.789361	0.636558	0.912773	0.837099	0.891732	1	0.498291	Patj	0.731748	18C	2.41499	2.00686	2.00686
CG12021-RB	1	1	24	15	CG12021-RB	0.527724	0.672121	0.41408	0.601235	1	0.789361	0.636558	0.912773	0.837099	0.891732	1	0.498291	Patj	0.731748	18C	2.41499	2.00686	2.00686
CG12021-RC	1	1	24	15	CG12021-RC	0.527724	0.672121	0.41408	0.601235	1	0.789361	0.636558	0.912773	0.837099	0.891732	1	0.498291	Patj	0.731748	18C	2.41499	2.00686	2.00686
CG12023-RA	1	1	24	9	CG12023-RA	0.610673	0.830371	1	0.262163	0.804997	0.567919	1	0.726982	0.985373	0.549928	0.610808	0.711159	GV1	0.721698	18C	3.81443	1.81842	1.81842
CG12023-RB	0.300911	1	24	5	CG12023-RB	0.676378	1	0.625234	0.648028	0.684738	0.774725	1	0.825344	0.976049	0.680593	0.719989	0.765994	GV1	0.781423	18C	1.5994	1.46931	1.46931
CG12024-RA	0.0214013	1	24	11	CG12024-RA	0.79653	0.805948	1	0.622636	0.377343	0.232331	0.3373	1	0.639805	0.349939	0.417969	0.267178	CG12024	0.570581	18C	4.30421	3.74283	3.74283
CG12024-RB	0.0214013	1	24	11	CG12024-RB	0.79653	0.805948	1	0.622636	0.377343	0.232331	0.3373	1	0.639805	0.349939	0.417969	0.267178	CG12024	0.570581	18C	4.30421	3.74283	3.74283
CG12025-RA	0.576952	1	24	7	CG12025-RA	0.872245	1	0.833195	0.967344	0.8384	0.393298	1	0.943093	0.65108	0.536211	0.767835	0.643336	CG12025	0.78717	18C	2.5426	1.86494	1.86494
CG12029-RB	1	1	24	15	CG12029-RB	0.659654	0.323614	0.5176	0.325669	1	0.256542	1	0	0.985373	0.771674	0.310762	0.0576078	dar1	0.517375	18C	3.89799	Inf	3.89799
CG12030-RA	0.421631	1	24	1	CG12030-RA	0.817532	0.813686	0.660273	0.641155	1	0.888002	0.55543	0.858559	0.62645	0.597715	0.661598	1	Gale	0.760033	18C	1.80041	1.67304	1.67304
CG12031-RA	1	1	24	3	CG12031-RA	0.67883	0.580264	0.59721	0.524708	0.467759	1	0.221353	1	0.257064	0.835082	0.243215	0.60115	MED14	0.583886	18C	4.51767	4.11159	4.11159
CG12031-RB	1	1	24	3	CG12031-RB	0.67883	0.580264	0.59721	0.524708	0.467759	1	0.221353	1	0.257064	0.835082	0.243215	0.60115	MED14	0.583886	18C	4.51767	4.11159	4.11159
CG12034-RA	1	1	24	5	CG12034-RA	0.670159	1	0.876404	0.863898	0.804273	0.651569	0.526023	0.693117	0.475135	0.606371	0.391264	1	CG12034	0.713184	18C	1.90106	2.55582	1.90106
CG12038-RA	0.300911	1	24	9	CG12038-RA	0.59793	1	0.810381	0.715626	0.515017	0.528495	1	0.4492	0.697973	0.342966	0.330185	0.172823	CG12038	0.596716	18C	1.94168	5.78625	1.94168
CG12042-RA	1	1	24	9	CG12042-RA	0.799554	0.706043	0.978702	1	0.242416	0.43533	1	0.368943	0.578086	0.578469	0.603914	0.642135	CG12042	0.661133	18C	4.12514	2.71044	2.71044
CG12045-RA	1	1	24	9	CG12045-RA	0.502562	1	0.754312	0.428964	0.84958	0.685286	0.526151	0.413375	1	0.519182	0.263368	0.29381	Cpr100A	0.603049	18C	2.3312	3.79697	2.3312
CG12050-RB	0.489949	1	24	3	CG12050-RB	1	0.817635	0.915429	0.411413	0.947466	0.324087	1	0.501964	0.387111	0.314386	0.56973	0.60351	CG12050	0.649394	18C	3.08559	3.18081	3.08559
CG12051-RA	0.209359	1	24	13	CG12051-RA	0.413588	1	0.853033	0.42782	0.582193	0.482539	0.440173	0.500906	1	0.635309	0.815035	0.414171	Act42A	0.630397	18C	2.41786	2.41446	2.41446
CG12052-RA	0.300911	1	24	7	CG12052-RA	0.672995	1	0.284344	0.276879	0.784788	0.402663	1	0.988241	0.301086	0.451929	0.178041	0.237632	lola	0.548217	18C	3.61168	5.61669	3.61168
CG12052-RB	1	1	24	1	CG12052-RB	1	0.889178	0.863119	0.493696	0.947466	0.48613	0.560351	0.412607	0.357276	0.326426	1	0.187987	lola	0.62702	18C	2.05706	5.31952	2.05706
CG12052-RC	1	1	24	1	CG12052-RC	1	0.889178	0.863119	0.493696	0.947466	0.48613	0.560351	0.412607	0.357276	0.326426	1	0.187987	lola	0.62702	18C	2.05706	5.31952	2.05706
CG12052-RD	1	1	24	3	CG12052-RD	1	0.613226	0.33628	0.117547	0.541409	0.277789	0.569193	1	0.171376	0.715784	0.97286	0.24046	lola	0.546327	18C	8.50726	5.83512	5.83512
CG12052-RE	1	1	24	3	CG12052-RE	1	0.613226	0.33628	0.117547	0.541409	0.277789	0.569193	1	0.171376	0.715784	0.97286	0.24046	lola	0.546327	18C	8.50726	5.83512	5.83512
CG12052-RF	1	1	24	21	CG12052-RF	0.493695	0.731638	0.548787	0.440077	0.896538	1	0.543796	1	0.448007	0.631243	0.720069	0.780074	lola	0.68616	18C	2.27233	2.23211	2.23211
CG12052-RG	1	1	24	1	CG12052-RG	0.514265	0.236521	0.5044	0.528939	0.487249	1	1	0.073203	0.100362	0.314386	0.0949551	0	lola	0.404523	18C	4.22796	Inf	4.22796
CG12052-RH	1	1	24	1	CG12052-RH	0.659654	0.485421	0.31056	0.108556	1	0.513085	0	0.342632	0.352314	0.122625	1	0.329557	lola	0.435367	18C	Inf	8.15491	8.15491
CG12052-RI	1	1	24	3	CG12052-RI	0.467514	0.229353	0.513571	0.307746	0.531544	1	0.607139	1	0.434153	0.715784	0.367525	0.384736	lola	0.546589	18C	4.36008	2.7209	2.7209
CG12052-RJ	1	1	24	21	CG12052-RJ	0.620851	0.799517	0.365365	0.715194	1	0.482903	0.309106	0.578788	0.551058	0.805559	0.618692	1	lola	0.65392	18C	3.23513	1.81469	1.81469
CG12052-RK	1	1	24	3	CG12052-RK	0.257133	0.630722	0.65572	0.370257	0.365437	1	0.847171	1	0.653621	0.898892	0.527908	0.827629	lola	0.669541	18C	3.88904	1.89427	1.89427
CG12052-RL	1	1	24	21	CG12052-RL	0.0857109	0.735842	0.941547	0.705252	0.649665	1	0.502113	0.708869	0.356351	0.57505	0.337153	1	lola	0.633129	18C	11.6671	2.96602	2.96602
CG12052-RM	0.421631	1	24	1	CG12052-RM	1	0.70521	0.156931	0.411413	0.663226	0.777809	0	0.0433198	0.356351	0.589145	0.421441	1	lola	0.510404	18C	Inf	23.0841	23.0841
CG12052-RN	0.300911	1	24	9	CG12052-RN	0.362382	1	0.710861	0.149089	0.343345	0	1	0.479147	0.821144	0.600191	0.543834	0.345647	lola	0.529637	18C	Inf	2.89313	2.89313
CG12052-RO	0.170207	1	24	23	CG12052-RO	0.514265	0.157681	0.35308	0.26447	0.609061	1	0.143461	0.189032	0.345553	0.202959	0.551704	1	lola	0.444272	18C	6.97055	5.29012	5.29012
CG12052-RP	1	1	24	21	CG12052-RP	0.771398	0.763506	0.976943	0.846303	0.666761	1	1	0.547162	0.773128	0.983121	0.811142	0.794793	lola	0.827855	18C	1.49979	1.82761	1.49979
CG12052-RQ	1	1	24	21	CG12052-RQ	0.43977	0.269678	0.20704	0.723709	1	0.342057	0.526023	0.742625	0.37332	0.425247	0.353208	1	lola	0.533556	18C	4.82998	2.8312	2.8312
CG12052-RR	1	1	24	1	CG12052-RR	0.514265	0.236521	0.5044	0.528939	0.487249	1	1	0.073203	0.100362	0.314386	0.0949551	0	lola	0.404523	18C	4.22796	Inf	4.22796
CG12052-RW	1	1	24	3	CG12052-RW	0.318612	0.781525	1	0.655406	0.603748	0.929322	1	0.465055	0.159399	0.1387	0.452433	0.223654	lola	0.560654	18C	3.13861	7.20983	3.13861
CG12052-RY	0.300911	1	24	9	CG12052-RY	0.362382	1	0.710861	0.149089	0.343345	0	1	0.479147	0.821144	0.600191	0.543834	0.345647	lola	0.529637	18C	Inf	2.89313	2.89313
CG12052-RZ	1	1	24	3	CG12052-RZ	0.642832	0.473042	0.60528	0.740515	0.487249	1	1	0.988241	0.301086	0.451929	0.178041	0.237632	lola	0.592154	18C	2.11398	5.61669	2.11398
CG12054-RA	1	1	24	19	CG12054-RA	0.303831	0.931585	0.596004	1	0.575738	0.590805	0.299633	0.355332	0.414991	0.197821	0.367027	1	CG12054	0.552731	18C	3.33741	5.05508	3.33741
CG12054-RB	1	1	24	3	CG12054-RB	1	0.881513	0.956296	0.61712	0.651383	0.972261	0.299633	0.368492	0.414991	0.197821	0.367027	1	CG12054	0.643878	18C	3.33741	5.05508	3.33741
CG12055-RA	1	1	24	1	CG12055-RA	0.959314	0.965483	0.908075	0.886981	1	0.883029	0.645316	0.931981	0.671713	0.733057	1	0.863588	Gapdh1	0.870711	18C	1.54963	1.48873	1.48873
CG12055-RB	1	1	24	1	CG12055-RB	0.959314	0.965483	0.908075	0.886981	1	0.883029	0.645316	0.931981	0.671713	0.733057	1	0.863588	Gapdh1	0.870711	18C	1.54963	1.48873	1.48873
CG12056-RA	1	1	24	21	CG12056-RA	0.438866	0.558951	0.397336	1	0.767651	0.623628	0.659066	1	0.478049	0.819385	0.614438	0.56951	CG12056	0.660573	18C	2.51676	2.09183	2.09183
CG12058-RA	1	1	24	15	CG12058-RA	0.128566	0.394201	0.60528	0.423151	0.243624	1	0.968715	0.364695	1	0.456825	0.768727	0.175389	Larp7	0.544098	18C	7.77809	5.70162	5.70162
CG12065-RA	1	1	24	3	CG12065-RA	0.94485	0.875847	1	0.632806	0.832756	0.726367	1	0.505612	0.63018	0.734785	0.496858	0.913687	CG12065	0.774479	18C	1.58026	2.01265	1.58026
CG12065-RB	1	1	24	3	CG12065-RB	0.94485	0.875847	1	0.632806	0.832756	0.726367	1	0.505612	0.63018	0.734785	0.496858	0.913687	CG12065	0.774479	18C	1.58026	2.01265	1.58026
CG12065-RC	1	1	24	3	CG12065-RC	0.94485	0.875847	1	0.632806	0.832756	0.726367	1	0.505612	0.63018	0.734785	0.496858	0.913687	CG12065	0.774479	18C	1.58026	2.01265	1.58026
CG12065-RD	1	1	24	3	CG12065-RD	0.94485	0.875847	1	0.632806	0.832756	0.726367	1	0.505612	0.63018	0.734785	0.496858	0.913687	CG12065	0.774479	18C	1.58026	2.01265	1.58026
CG12070-RA	0.248511	1	24	23	CG12070-RA	0.828126	0.797181	0.834496	0.870732	0.932303	1	0.916955	0.930785	0.976003	0.876043	0.976146	1	Sap-r	0.911564	18C	1.25442	1.1415	1.1415
CG12070-RB	0.248511	1	24	23	CG12070-RB	0.828126	0.797181	0.834496	0.870732	0.932303	1	0.916955	0.930785	0.976003	0.876043	0.976146	1	Sap-r	0.911564	18C	1.25442	1.1415	1.1415
CG12071-RA	1	1	24	21	CG12071-RA	0.634081	0.583253	0.37315	1	0.100128	0.719241	0.696207	0.91736	0.880397	0.700407	0.832965	1	CG12071	0.703099	18C	9.98718	1.42774	1.42774
CG12071-RB	1	1	24	21	CG12071-RB	0.634081	0.583253	0.37315	1	0.100128	0.719241	0.696207	0.91736	0.880397	0.700407	0.832965	1	CG12071	0.703099	18C	9.98718	1.42774	1.42774
CG12072-RA	1	1	24	15	CG12072-RA	0.926871	0.554172	1	0.648257	0.746452	0.856103	0.427757	1	0.710432	0.97607	0.837249	0.891887	wts	0.797938	18C	2.33777	1.40759	1.40759
CG12073-RA	0.576952	1	24	13	CG12073-RA	0.392138	0.420821	1	0.806654	0.743074	0	0.497226	1	0.11819	0.493644	0.134188	0.132667	5-HT7	0.478217	18C	Inf	8.46092	8.46092
CG12075-RA	0.880418	1	24	3	CG12075-RA	1	0.693914	0.681409	0.77952	0.598399	0.767574	1	0.628881	0.390044	0.428708	0.407875	0.403255	CG12075	0.648298	18C	1.67112	2.56382	1.67112
CG12075-RB	0.880418	1	24	3	CG12075-RB	1	0.693914	0.681409	0.77952	0.598399	0.767574	1	0.628881	0.390044	0.428708	0.407875	0.403255	CG12075	0.648298	18C	1.67112	2.56382	1.67112
CG12076-RA	1	1	24	13	CG12076-RA	0.354504	1	0.500693	0.291696	0.671761	0.413605	0.378035	0.64044	1	0.993236	0.66921	0.889778	YT521-B	0.650246	18C	3.42823	1.56143	1.56143
CG12076-RB	1	1	24	13	CG12076-RB	0.354504	1	0.500693	0.291696	0.671761	0.413605	0.378035	0.64044	1	0.993236	0.66921	0.889778	YT521-B	0.650246	18C	3.42823	1.56143	1.56143
CG12079-RA	0.880418	1	24	15	CG12079-RA	0.742815	0.841243	0.87624	0.77893	1	0.773275	0.71084	0.846653	0.682908	0.874103	1	0.809468	NDUFS3	0.828039	18C	1.40679	1.46433	1.40679
CG1208-RB	1	1	24	13	CG1208-RB	0.395793	0.62026	0.552107	0.651338	1	0.256542	0.932012	1	0.974138	0.753457	0.568924	0.658101	CG1208	0.696889	18C	3.89799	1.7577	1.7577
CG1208-RC	1	1	24	13	CG1208-RC	0.395793	0.62026	0.552107	0.651338	1	0.256542	0.932012	1	0.974138	0.753457	0.568924	0.658101	CG1208	0.696889	18C	3.89799	1.7577	1.7577
CG12081-RA	0.141715	1	24	5	CG12081-RA	1	0.69499	0.575412	0.521124	0.694808	0.583357	0.80446	1	0.233072	0.415155	0.376172	0.403972	CG12081	0.608543	18C	1.91893	4.29053	1.91893
CG12082-RA	0.141715	1	24	5	CG12082-RA	1	0.97662	0.726531	0.746639	0.52637	0.612164	0.959394	0.8152	0.842284	0.60042	0.65898	1	CG12082	0.788717	18C	1.8998	1.6655	1.6655
CG12084-RA	1	1	24	1	CG12084-RA	0.565692	0.315361	0.342992	0.444309	0.438524	1	0.729681	0.828852	1	0.711935	0.924622	0.733444	CG12084	0.669618	18C	3.17097	1.40462	1.40462
CG12085-RA	1	1	24	13	CG12085-RA	0.897024	0.904968	0.930902	1	0.712819	0.844007	0.740291	0.720602	1	0.616438	0.866331	0.862152	pUf68	0.841295	18C	1.40288	1.62222	1.40288
CG12085-RB	1	1	24	13	CG12085-RB	0.897024	0.904968	0.930902	1	0.712819	0.844007	0.740291	0.720602	1	0.616438	0.866331	0.862152	pUf68	0.841295	18C	1.40288	1.62222	1.40288
CG12085-RC	1	1	24	13	CG12085-RC	0.897024	0.904968	0.930902	1	0.712819	0.844007	0.740291	0.720602	1	0.616438	0.866331	0.862152	pUf68	0.841295	18C	1.40288	1.62222	1.40288
CG12085-RD	1	1	24	13	CG12085-RD	0.897024	0.904968	0.930902	1	0.712819	0.844007	0.740291	0.720602	1	0.616438	0.866331	0.862152	pUf68	0.841295	18C	1.40288	1.62222	1.40288
CG12085-RE	1	1	24	13	CG12085-RE	0.897024	0.904968	0.930902	1	0.712819	0.844007	0.740291	0.720602	1	0.616438	0.866331	0.862152	pUf68	0.841295	18C	1.40288	1.62222	1.40288
CG12085-RF	1	1	24	13	CG12085-RF	0.897024	0.904968	0.930902	1	0.712819	0.844007	0.740291	0.720602	1	0.616438	0.866331	0.862152	pUf68	0.841295	18C	1.40288	1.62222	1.40288
CG12085-RG	1	1	24	13	CG12085-RG	0.897024	0.904968	0.930902	1	0.712819	0.844007	0.740291	0.720602	1	0.616438	0.866331	0.862152	pUf68	0.841295	18C	1.40288	1.62222	1.40288
CG12085-RH	1	1	24	13	CG12085-RH	0.897024	0.904968	0.930902	1	0.712819	0.844007	0.740291	0.720602	1	0.616438	0.866331	0.862152	pUf68	0.841295	18C	1.40288	1.62222	1.40288
CG12085-RI	1	1	24	13	CG12085-RI	0.897024	0.904968	0.930902	1	0.712819	0.844007	0.740291	0.720602	1	0.616438	0.866331	0.862152	pUf68	0.841295	18C	1.40288	1.62222	1.40288
CG12086-RA	1	1	24	9	CG12086-RA	0.81712	0.678545	0.641156	0.700363	1	0.595841	0.964734	1	0.883023	0.691521	0.857436	0.570583	cue	0.78336	18C	1.6783	1.75259	1.6783
CG12090-RA	0.772187	1	24	1	CG12090-RA	0.839151	0.550079	0.635738	1	0.603154	0.900275	0.623337	0.509441	0.634305	0.409301	0.721507	1	CG12090	0.702191	18C	1.81792	2.44319	1.81792
CG12090-RB	0.772187	1	24	1	CG12090-RB	0.839151	0.550079	0.635738	1	0.603154	0.900275	0.623337	0.509441	0.634305	0.409301	0.721507	1	CG12090	0.702191	18C	1.81792	2.44319	1.81792
CG12090-RC	0.772187	1	24	1	CG12090-RC	0.839151	0.550079	0.635738	1	0.603154	0.900275	0.623337	0.509441	0.634305	0.409301	0.721507	1	CG12090	0.702191	18C	1.81792	2.44319	1.81792
CG12091-RA	1	1	24	15	CG12091-RA	0.857109	0.75051	0.869601	0.898786	0.770533	1	0.886484	0.848312	1	0.928783	0.886135	0.749851	CG12091	0.870509	18C	1.33243	1.3336	1.33243
CG12093-RA	1	1	24	15	CG12093-RA	0.64881	0.767316	1	0.810321	0.658634	0.788516	0.98879	0.631701	0.974327	0.800703	0.913299	1	CG12093	0.831868	18C	1.54128	1.58303	1.54128
CG12096-RA	1	1	24	3	CG12096-RA	0.599976	0.840963	0.437147	0.387889	0.730873	1	0.328867	1	0.799756	0.811222	0.648573	0.73741	CG12096	0.693556	18C	3.04074	1.54185	1.54185
CG12099-RA	0.576952	1	24	1	CG12099-RA	0.928995	0.895218	0.898157	0.709802	0.911627	1	0.563132	0.770923	0.891796	0.731154	1	0.954686	CG12099	0.854624	18C	1.77578	1.3677	1.3677
CG12099-RB	0.576952	1	24	1	CG12099-RB	0.928995	0.895218	0.898157	0.709802	0.911627	1	0.563132	0.770923	0.891796	0.731154	1	0.954686	CG12099	0.854624	18C	1.77578	1.3677	1.3677
CG1210-RA	0.0931041	1	24	11	CG1210-RA	0.71548	0.884357	1	0.542722	0.783813	0.391293	0.837055	0.992654	0.995501	1	0.560352	0.795645	Pdk1	0.791573	18C	2.55563	1.78459	1.78459
CG1210-RB	0.0931041	1	24	11	CG1210-RB	0.71548	0.884357	1	0.542722	0.783813	0.391293	0.837055	0.992654	0.995501	1	0.560352	0.795645	Pdk1	0.791573	18C	2.55563	1.78459	1.78459
CG1210-RC	0.0931041	1	24	11	CG1210-RC	0.71548	0.884357	1	0.542722	0.783813	0.391293	0.837055	0.992654	0.995501	1	0.560352	0.795645	Pdk1	0.791573	18C	2.55563	1.78459	1.78459
CG1210-RD	0.0931041	1	24	11	CG1210-RD	0.71548	0.884357	1	0.542722	0.783813	0.391293	0.837055	0.992654	0.995501	1	0.560352	0.795645	Pdk1	0.791573	18C	2.55563	1.78459	1.78459
CG1210-RE	0.0931041	1	24	11	CG1210-RE	0.71548	0.884357	1	0.542722	0.783813	0.391293	0.837055	0.992654	0.995501	1	0.560352	0.795645	Pdk1	0.791573	18C	2.55563	1.78459	1.78459
CG1210-RF	0.0931041	1	24	11	CG1210-RF	0.71548	0.884357	1	0.542722	0.783813	0.391293	0.837055	0.992654	0.995501	1	0.560352	0.795645	Pdk1	0.791573	18C	2.55563	1.78459	1.78459
CG1210-RG	0.0931041	1	24	11	CG1210-RG	0.71548	0.884357	1	0.542722	0.783813	0.391293	0.837055	0.992654	0.995501	1	0.560352	0.795645	Pdk1	0.791573	18C	2.55563	1.78459	1.78459
CG1210-RH	0.0931041	1	24	11	CG1210-RH	0.71548	0.884357	1	0.542722	0.783813	0.391293	0.837055	0.992654	0.995501	1	0.560352	0.795645	Pdk1	0.791573	18C	2.55563	1.78459	1.78459
CG12101-RA	1	1	24	3	CG12101-RA	0.933578	1	0.798013	0.698079	0.945479	0.902611	0.722041	0.807955	0.916091	0.949535	0.700546	1	Hsp60	0.864494	18C	1.4325	1.42746	1.42746
CG12101-RB	1	1	24	3	CG12101-RB	0.933578	1	0.798013	0.698079	0.945479	0.902611	0.722041	0.807955	0.916091	0.949535	0.700546	1	Hsp60	0.864494	18C	1.4325	1.42746	1.42746
CG12104-RA	1	1	24	21	CG12104-RA	1	0.81523	0.738497	0.968032	0.891732	0.937946	0.61849	0.46569	0.518753	1	0.679576	0.671878	CG12104	0.775485	18C	1.61684	2.14735	1.61684
CG12105-RA	0.880418	1	24	17	CG12105-RA	0.395793	0.566324	0.5176	0.651338	1	0	0.137664	0.0604645	0.103622	0.411156	1	0.0872358	CG12105	0.410933	18C	Inf	16.5386	16.5386
CG12106-RA	1	1	24	13	CG12106-RA	0.803983	0.894321	0.704202	1	0.28344	0.290858	0.787629	0.239498	0.383079	1	0.232998	0.575895	CG12106	0.599658	18C	3.52808	4.29189	3.52808
CG12107-RA	0.663955	1	24	1	CG12107-RA	0.840385	0.726869	0.723383	0.691491	0.915077	1	0.650953	0.70178	0.677067	0.748834	0.64059	1	CG12107	0.776369	18C	1.53621	1.56106	1.53621
CG12108-RA	1	1	24	11	CG12108-RA	0.23999	0.693794	0.322816	0.310311	0.324832	1	0.437692	0.746352	1	0.679925	0.83611	0.587349	Ppt1	0.598264	18C	4.16683	1.70257	1.70257
CG12109-RB	0.353312	1	24	17	CG12109-RB	0.364597	0.521687	0.762885	1	0.690886	0.590805	0.254465	0.335297	0.153232	1	0.217464	0.483752	Caf1-180	0.531256	18C	3.92982	6.52607	3.92982
CG12112-RA	1	1	24	21	CG12112-RA	0.285703	0.560642	0.179342	0.470168	0.216555	1	0.273618	0.450667	0.339828	1	0.379978	0.346776	CG12112	0.458606	18C	5.57593	2.94266	2.94266
CG12113-RA	1	1	24	1	CG12113-RA	1	0.34494	0.58849	0.15428	0.829033	0.729196	1	0.85934	0.314177	0.861143	0.520189	0.275516	IntS4	0.623025	18C	6.48172	3.62956	3.62956
CG12117-RA	0.772187	1	24	15	CG12117-RA	0.719599	0.735462	0.464256	1	0.878758	0.590805	0.630491	1	0.917522	0.842423	0.773299	0.799066	Sptr	0.779307	18C	2.15398	1.29316	1.29316
CG12118-RA	1	1	24	15	CG12118-RA	0.906818	0.79113	0.762885	1	0.620026	0.727145	0.545629	0.692964	0.688794	0.74402	1	0.549879	CG12118	0.752441	18C	1.83275	1.81858	1.81858
CG12118-RB	1	1	24	15	CG12118-RB	0.906818	0.79113	0.762885	1	0.620026	0.727145	0.545629	0.692964	0.688794	0.74402	1	0.549879	CG12118	0.752441	18C	1.83275	1.81858	1.81858
CG12119-RA	1	1	24	15	CG12119-RA	1	0.728206	0.686572	0.565693	0.947466	0.364598	0.73122	0.674447	0.825601	1	0.718632	0.64871	CG12119	0.740929	18C	2.74275	1.54152	1.54152
CG1212-RB	1	1	24	13	CG1212-RB	0.411412	0.883011	0.322816	0.380836	0.0974497	1	0.387895	1	0.44177	0.890754	0.63416	0.213742	p130CAS	0.55532	18C	10.2617	4.67854	4.67854
CG1212-RD	1	1	24	13	CG1212-RD	0.411412	0.883011	0.322816	0.380836	0.0974497	1	0.387895	1	0.44177	0.890754	0.63416	0.213742	p130CAS	0.55532	18C	10.2617	4.67854	4.67854
CG1212-RE	1	1	24	13	CG1212-RE	0.411412	0.883011	0.322816	0.380836	0.0974497	1	0.387895	1	0.44177	0.890754	0.63416	0.213742	p130CAS	0.55532	18C	10.2617	4.67854	4.67854
CG1212-RF	1	1	24	13	CG1212-RF	0.411412	0.883011	0.322816	0.380836	0.0974497	1	0.387895	1	0.44177	0.890754	0.63416	0.213742	p130CAS	0.55532	18C	10.2617	4.67854	4.67854
CG12121-RA	1	1	24	13	CG12121-RA	1	0.829659	0.646185	0.968032	0.557333	0.514726	0.76646	0.807943	0.542311	1	0.818766	0.631403	CG12121	0.756902	18C	1.94278	1.84396	1.84396
CG12123-RA	0.772187	1	24	15	CG12123-RA	0.679466	1	0.710861	0.894533	0.515017	0.528495	0.263596	0.48626	1	0.82042	0.653277	0.868592	CG12123	0.70171	18C	3.79369	2.05651	2.05651
CG12125-RA	1	1	24	1	CG12125-RA	0.642832	0.748982	0.70616	0.793409	0.852685	1	1	0.527062	0.825837	0.700631	0.927847	0.651791	CG12125	0.781436	18C	1.55562	1.89731	1.55562
CG12125-RB	0.772187	1	24	3	CG12125-RB	0.771398	0.367921	0.60528	0.211576	0.324832	1	1	0.527062	0.825837	0.700631	0.927847	0.651791	CG12125	0.659515	18C	4.72644	1.89731	1.89731
CG12127-RA	1	1	24	21	CG12127-RA	0.383799	0.382453	0.41408	0.355275	1	0.559729	0.144405	0.602539	1	0.431288	0.514198	0.518541	amx	0.525526	18C	6.92498	2.31864	2.31864
CG12128-RA	1	1	24	21	CG12128-RA	0.405107	0.621056	0.43707	1	0.671695	0.689273	1	0.683228	0.869805	0.663703	0.917899	0.844915	CG12128	0.733646	18C	2.46848	1.5067	1.5067
CG12129-RA	1	1	24	15	CG12129-RA	0.578548	0.729272	0.7566	0.60828	0.548155	1	0.453729	0.188797	0.711819	0.653168	1	0.484247	CG12129	0.642718	18C	2.20396	5.29668	2.20396
CG1213-RA	1	1	24	21	CG1213-RA	0.827802	0.862971	0.941829	0.915278	1	0.995988	0.551467	1	0.545557	0.705877	0.63062	0.72554	CG1213	0.808577	18C	1.81334	1.83299	1.81334
CG1213-RB	1	1	24	21	CG1213-RB	0.827802	0.862971	0.941829	0.915278	1	0.995988	0.551467	1	0.545557	0.705877	0.63062	0.72554	CG1213	0.808577	18C	1.81334	1.83299	1.81334
CG1213-RC	1	1	24	21	CG1213-RC	0.827802	0.862971	0.941829	0.915278	1	0.995988	0.551467	1	0.545557	0.705877	0.63062	0.72554	CG1213	0.808577	18C	1.81334	1.83299	1.81334
CG12130-RA	1	1	24	21	CG12130-RA	0.484014	0.834779	0.569675	0.871194	0.630557	1	0.402694	1	0.419697	0.306765	0.900061	0.785175	Pal1	0.683718	18C	2.48327	3.25983	2.48327
CG12130-RB	1	1	24	21	CG12130-RB	0.484014	0.834779	0.569675	0.871194	0.630557	1	0.402694	1	0.419697	0.306765	0.900061	0.785175	Pal1	0.683718	18C	2.48327	3.25983	2.48327
CG12131-RA	1	1	24	3	CG12131-RA	0.908939	0.663852	0.905526	1	0.832159	0.99295	0.810831	0.982234	0.795391	0.797633	0.767441	1	Adam	0.871413	18C	1.50636	1.30303	1.30303
CG12132-RA	1	1	24	15	CG12132-RA	0.82928	0.809035	0.82816	0.558289	1	0.513085	0.611666	0.683318	0.540482	0.965676	1	0.471866	c11.1	0.734238	18C	1.94899	2.11925	1.94899
CG12134-RA	0.300911	1	24	15	CG12134-RA	0.102853	0.252289	0.968448	0.507782	0.584698	1	0.0883558	0.232845	0.997601	1	0.755085	0.671878	CG12134	0.59682	18C	11.3179	4.29471	4.29471
CG12134-RB	0.300911	1	24	15	CG12134-RB	0.102853	0.252289	0.968448	0.507782	0.584698	1	0.0883558	0.232845	0.997601	1	0.755085	0.671878	CG12134	0.59682	18C	11.3179	4.29471	4.29471
CG12135-RA	0.141715	1	24	1	CG12135-RA	0.642832	0.525602	0.369893	0.352626	0.649665	1	1	0.336422	0.499675	0.401343	0.709133	0.593238	c12.1	0.590036	18C	2.83587	2.97245	2.83587
CG12140-RA	1	1	24	21	CG12140-RA	0.652711	0.932519	0.730088	0.857023	1	0.90465	0.765827	0.883724	0.700125	0.798902	0.759585	1	Etf-QO	0.832096	18C	1.53207	1.42832	1.42832
CG12141-RA	1	1	24	21	CG12141-RA	0.634026	0.838083	0.707542	0.788337	0.867703	1	0.702086	0.897074	0.557297	0.927049	1	0.771164	Aats-lys	0.80753	18C	1.57722	1.79437	1.57722
CG12141-RB	1	1	24	21	CG12141-RB	0.634026	0.838083	0.707542	0.788337	0.867703	1	0.702086	0.897074	0.557297	0.927049	1	0.771164	Aats-lys	0.80753	18C	1.57722	1.79437	1.57722
CG12142-RA	0.421631	1	24	3	CG12142-RA	0.985084	0.884545	0.855765	0.86845	1	0.889347	1	0.484655	0.529496	0.433635	0.638491	0.742942	Tsp42Eg	0.776034	18C	1.16854	2.30609	1.16854
CG12143-RA	0.663955	1	24	9	CG12143-RA	0.89581	0.984475	0.881317	1	0.742888	0.800446	0.930301	0.894575	0.866562	1	0.793569	0.847433	Tsp42Ej	0.886448	18C	1.3461	1.26013	1.26013
CG12149-RA	0.300911	1	24	15	CG12149-RA	0.315272	1	0.588593	0.53672	0.61802	0.380516	0.387903	0.59631	0.694915	1	0.663001	0.548973	c12.2	0.610852	18C	3.17186	1.82158	1.82158
CG12151-RA	1	1	24	21	CG12151-RA	0.413621	0.472301	0.481228	0.457697	1	0.443749	0.672756	0.77702	0.697698	0.861686	0.979517	1	Pdp	0.688106	18C	2.41767	1.43329	1.43329
CG12153-RA	1	1	24	21	CG12153-RA	0.293866	0.540619	0.518811	0.725402	0.556856	1	0.398557	0.0583512	1	0.375902	0.7569	0.954115	Hira	0.598282	18C	3.40291	17.1376	3.40291
CG12154-RC	1	1	24	1	CG12154-RC	0.257133	0.473042	0.40352	0	0.974497	1	0.807957	0.58737	0.931116	0.210215	1	0.564955	oc	0.600817	18C	Inf	4.75703	4.75703
CG12155-RA	0.0155956	1	24	11	CG12155-RA	0.231718	0.781525	1	0.857987	0	0.45058	0.738068	0.928314	1	0.601189	0.430057	0.595259	CG12155	0.634558	18C	Inf	2.32527	2.32527
CG12156-RA	0.300911	1	24	23	CG12156-RA	0.835681	0.788403	0.85748	0.95209	0.852685	1	0.798969	0.862107	0.733041	0.445012	1	0.972726	Rab39	0.841516	18C	1.26839	2.24713	1.26839
CG12157-RA	1	1	24	3	CG12157-RA	0.751618	0.460912	0.1552	0.455701	0.449768	1	0.890626	0.950007	0.702311	1	0.761125	0.842087	Tom40	0.701613	18C	6.4433	1.42387	1.42387
CG12157-RB	1	1	24	3	CG12157-RB	0.751618	0.460912	0.1552	0.455701	0.449768	1	0.890626	0.950007	0.702311	1	0.761125	0.842087	Tom40	0.701613	18C	6.4433	1.42387	1.42387
CG12158-RA	1	1	24	21	CG12158-RA	0.78848	0.899664	0.850206	1	0.765228	0.939215	0.980718	0.971305	0.686169	0.993322	0.981957	1	CG12158	0.904689	18C	1.3068	1.45737	1.3068
CG12159-RA	0.0729854	1	24	7	CG12159-RA	0.737706	1	0.517913	0.383371	0.515017	0.754993	0.965903	1	0.897388	0.871956	0.636781	0.961839	CG12159	0.770239	18C	2.60844	1.5704	1.5704
CG12159-RB	0.170207	1	24	7	CG12159-RB	0.50176	1	0.836628	0.645096	0.7131	0.670782	0.965903	1	0.897388	0.871956	0.636781	0.961839	CG12159	0.808436	18C	1.99299	1.5704	1.5704
CG1216-RA	0.772187	1	24	3	CG1216-RA	1	0.698034	0.609358	0.533962	0.725718	0.51716	0.881259	0.945159	0.712702	0.773177	0.718091	1	mri	0.759552	18C	1.93364	1.40311	1.40311
CG1216-RB	0.772187	1	24	3	CG1216-RB	1	0.698034	0.609358	0.533962	0.725718	0.51716	0.881259	0.945159	0.712702	0.773177	0.718091	1	mri	0.759552	18C	1.93364	1.40311	1.40311
CG12162-RA	0.209359	1	24	11	CG12162-RA	0.910774	1	0.952856	0.827919	0.854709	0.809609	0.858559	0.858686	0.967041	1	0.950301	0.832473	CG12162	0.901911	18C	1.23516	1.20124	1.20124
CG12162-RB	0.576952	1	24	13	CG12162-RB	0.819584	1	0.888392	0.688281	0.832566	0.821495	0.858559	0.858686	0.967041	1	0.950301	0.832473	CG12162	0.876448	18C	1.4529	1.20124	1.20124
CG12163-RA	1	1	24	21	CG12163-RA	0.744043	0.767155	0.764112	0.888318	0.601286	1	0.95865	0.850402	1	0.905344	0.98483	0.838678	CG12163	0.858568	18C	1.6631	1.19235	1.19235
CG12163-RB	1	1	24	21	CG12163-RB	0.744043	0.767155	0.764112	0.888318	0.601286	1	0.95865	0.850402	1	0.905344	0.98483	0.838678	CG12163	0.858568	18C	1.6631	1.19235	1.19235
CG12164-RA	1	1	24	3	CG12164-RA	0.257133	0.630722	0.20176	0.846303	0	1	1	0.0878436	0.0602172	0.125754	0.056973	0.59144	CG12164	0.404845	18C	Inf	17.5522	17.5522
CG12170-RA	0.300911	1	24	9	CG12170-RA	0.962577	1	0.968548	0.913169	0.622312	0.72668	0.772295	0.822143	0.76064	1	0.712203	0.840538	CG12170	0.841759	18C	1.60691	1.40409	1.40409
CG12171-RA	0.421631	1	24	13	CG12171-RA	0.785889	1	0.786229	0.792147	0.632912	0.611271	0.420452	0.674447	0.627457	1	0.656142	0.463364	CG12171	0.704193	18C	2.3784	2.15813	2.15813
CG12173-RA	0.880418	1	24	19	CG12173-RA	0.58636	0.979831	0.667129	0.832265	1	0.798132	0.854277	0.681061	0.888351	0.873424	1	0.873428	CG12173	0.836188	18C	1.70544	1.4683	1.4683
CG12175-RB	1	1	24	21	CG12175-RB	0.716729	0.707049	0.684641	1	0.708601	0.908931	0.399434	1	0.108238	0.602766	0.75098	0.101246	tth	0.640718	18C	2.50354	9.87691	2.50354
CG12176-RA	0.576952	1	24	9	CG12176-RA	1	0.70083	0.627723	0.822827	0.541409	0.555578	0.758924	1	0.447068	0.746905	0.422983	0	Lig4	0.635354	18C	1.84703	Inf	1.84703
CG12177-RA	1	1	24	15	CG12177-RA	0.925678	0.56765	0.80704	0.677042	0.194899	1	0.660829	0.441026	1	0.858001	0.73343	0.630856	CG12177	0.708038	18C	5.13085	2.26744	2.26744
CG12178-RA	1	1	24	3	CG12178-RA	1	0.749499	0.523102	0.518076	0.491279	0.576155	0.495964	0.23764	0.386895	0.871757	0.500912	1	Nhe1	0.612607	18C	2.03551	4.20805	2.03551
CG1218-RA	1	1	24	9	CG1218-RA	1	0.726787	0.566694	0.518076	0.666735	0.648174	0.669411	0.491914	1	0.667784	0.792105	0.424196	CG1218	0.68099	18C	1.93022	2.3574	1.93022
CG12187-RA	1	1	24	9	CG12187-RA	0.494741	0.566324	0.85404	0.217113	1	0.448949	1	0.289241	0.704982	0.690115	0.291813	0.556407	Fife	0.59281	18C	4.60591	3.45732	3.45732
CG12190-RA	0.141715	1	24	5	CG12190-RA	0.87808	1	0.836628	0.825723	0.83195	0.487841	1	0.761312	0.341231	0.104795	0.322847	0.36613	RYBP	0.646378	18C	2.04985	9.54242	2.04985
CG12191-RA	1	1	24	21	CG12191-RA	0.308559	0.56765	0.726336	0.761672	0.487249	1	1	0.683228	0.33454	0.593839	0.791292	0.516337	dpr20	0.647559	18C	3.24087	2.98918	2.98918
CG12194-RA	0.576952	1	24	19	CG12194-RA	0.989482	0.920277	0.78934	0.800603	1	0.833763	0.664125	0.260991	0.799835	1	0.886187	0.782627	CG12194	0.810602	18C	1.50574	3.83155	1.50574
CG12196-RA	1	1	24	13	CG12196-RA	0.69447	0.585568	0.658443	1	0.164497	0.112534	0.643735	0.299372	0.478849	1	0.614855	0.863843	egg	0.593014	18C	8.88618	3.34033	3.34033
CG12199-RA	0.576952	1	24	23	CG12199-RA	0.561017	0.358365	0.348495	0.384683	0.487249	1	0.765203	0.686484	1	0.813839	0.876557	0.969797	kek5	0.687641	18C	2.86949	1.4567	1.4567
CG12199-RB	0.576952	1	24	23	CG12199-RB	0.536625	0.342784	0.333343	0.367958	0.466064	1	0.765203	0.686484	1	0.813839	0.876557	0.969797	kek5	0.679888	18C	2.99992	1.4567	1.4567
CG1220-RA	1	1	24	21	CG1220-RA	0.731395	0.756501	1	0.986661	0.74948	0.885069	0.616042	0.950695	0.583662	0.821012	1	0.903807	Kaz1-ORFB	0.832027	18C	1.62327	1.71332	1.62327
CG12202-RA	1	1	24	15	CG12202-RA	0.839677	0.677516	0.936268	1	0.879309	0.429677	0.379146	0.648109	0.499817	0.695859	0.586733	1	Nat1	0.714343	18C	2.6375	2.00073	2.00073
CG12203-RA	1	1	24	17	CG12203-RA	0.897261	1	0.926711	0.863628	0.911412	0.746588	0.710998	0.707105	0.701275	0.701645	1	0.783858	CG12203	0.829207	18C	1.40647	1.42597	1.40647
CG12204-RA	1	1	24	3	CG12204-RA	0.707115	0.611012	0.70616	0.775777	0.548155	1	0.526023	0.940658	0.509073	0.496122	0.288988	1	CG12204	0.675757	18C	1.90106	3.46035	1.90106
CG12207-RA	1	1	24	13	CG12207-RA	0.613623	0.694689	1	0.841509	0.447221	0.887254	0.641565	1	0.607767	0.782197	0.588396	0.704027	CG12207	0.734021	18C	2.23603	1.69953	1.69953
CG12207-RB	1	1	24	13	CG12207-RB	0.613623	0.694689	1	0.841509	0.447221	0.887254	0.641565	1	0.607767	0.782197	0.588396	0.704027	CG12207	0.734021	18C	2.23603	1.69953	1.69953
CG12207-RC	1	1	24	13	CG12207-RC	0.613623	0.694689	1	0.841509	0.447221	0.887254	0.641565	1	0.607767	0.782197	0.588396	0.704027	CG12207	0.734021	18C	2.23603	1.69953	1.69953
CG1221-RA	0.170207	1	24	17	CG1221-RA	0.819475	0.96246	0.904564	1	0.908021	0.85076	0.90963	0.656546	0.926297	1	0.93581	0.910523	miple	0.898674	18C	1.22029	1.52312	1.22029
CG1221-RB	0.170207	1	24	17	CG1221-RB	0.819475	0.96246	0.904564	1	0.908021	0.85076	0.90963	0.656546	0.926297	1	0.93581	0.910523	miple	0.898674	18C	1.22029	1.52312	1.22029
CG12210-RA	1	1	24	13	CG12210-RA	0.819015	0.893523	0.926601	0.861975	0.812081	1	0.85985	0.671038	1	0.901468	0.851512	0.879283	Syb	0.873029	18C	1.2314	1.49023	1.2314
CG12210-RB	1	1	24	13	CG12210-RB	0.819015	0.893523	0.926601	0.861975	0.812081	1	0.85985	0.671038	1	0.901468	0.851512	0.879283	Syb	0.873029	18C	1.2314	1.49023	1.2314
CG12210-RC	1	1	24	13	CG12210-RC	0.819015	0.893523	0.926601	0.861975	0.812081	1	0.85985	0.671038	1	0.901468	0.851512	0.879283	Syb	0.873029	18C	1.2314	1.49023	1.2314
CG12210-RD	1	1	24	13	CG12210-RD	0.819015	0.893523	0.926601	0.861975	0.812081	1	0.85985	0.671038	1	0.901468	0.851512	0.879283	Syb	0.873029	18C	1.2314	1.49023	1.2314
CG12212-RA	0.772187	1	24	21	CG12212-RA	1	0.136273	0.348735	0.914252	0.631644	0	0.299289	0.107553	0.196607	0.307938	0.441786	1	peb	0.448673	18C	Inf	9.29778	9.29778
CG12212-RB	0.772187	1	24	21	CG12212-RB	1	0.136273	0.348735	0.914252	0.631644	0	0.299289	0.107553	0.196607	0.307938	0.441786	1	peb	0.448673	18C	Inf	9.29778	9.29778
CG12214-RA	1	1	24	13	CG12214-RA	1	0.927908	0.863807	0.927485	0.747999	0.759046	0.729868	0.653749	1	0.862408	0.781429	0.88344	mlt	0.844762	18C	1.37011	1.52964	1.37011
CG12214-RB	1	1	24	13	CG12214-RB	1	0.927908	0.863807	0.927485	0.747999	0.759046	0.729868	0.653749	1	0.862408	0.781429	0.88344	mlt	0.844762	18C	1.37011	1.52964	1.37011
CG12217-RA	0.353312	1	24	19	CG12217-RA	0.527724	0.733525	0.82816	0.723709	1	0.957759	0.385762	0.372754	0.964025	0.509367	1	0.668168	PpV	0.722579	18C	2.59227	2.68273	2.59227
CG12218-RA	1	1	24	3	CG12218-RA	0.99828	0.890431	0.996932	0.79652	0.687881	1	0.789034	0.346558	0.831486	0.682168	0.730497	1	mei-P26	0.812482	18C	1.45374	2.88552	1.45374
CG12219-RA	1	1	24	1	CG12219-RA	0.904669	0.554767	0.82816	0.248129	1	0.146596	0.166112	0.930235	0.675191	0.47001	0.745285	1	CG12219	0.639096	18C	6.82148	2.12761	2.12761
CG12220-RA	1	1	24	3	CG12220-RA	0.794011	0.735331	0.813744	1	0.644827	0.78774	0.740156	0.947668	0.700088	0.71784	0.722044	1	mRpL32	0.800287	18C	1.5508	1.42839	1.42839
CG12223-RA	1	1	24	9	CG12223-RA	1	0.836218	0.820319	0.860228	0.775199	0.353549	1	0.68008	0.446773	0.851883	0.615676	0.749521	Dsp1	0.749121	18C	2.82846	2.23827	2.23827
CG12223-RB	1	1	24	9	CG12223-RB	1	0.836218	0.820319	0.860228	0.775199	0.353549	1	0.68008	0.446773	0.851883	0.615676	0.749521	Dsp1	0.749121	18C	2.82846	2.23827	2.23827
CG12223-RC	1	1	24	9	CG12223-RC	1	0.836218	0.820319	0.860228	0.775199	0.353549	1	0.68008	0.446773	0.851883	0.615676	0.749521	Dsp1	0.749121	18C	2.82846	2.23827	2.23827
CG12223-RD	1	1	24	9	CG12223-RD	1	0.836218	0.820319	0.860228	0.775199	0.353549	1	0.564709	0.456592	0.860242	0.535296	0.571014	Dsp1	0.719447	18C	2.82846	2.19014	2.19014
CG12223-RE	1	1	24	9	CG12223-RE	1	0.836218	0.820319	0.860228	0.775199	0.353549	1	0.68008	0.446773	0.851883	0.615676	0.749521	Dsp1	0.749121	18C	2.82846	2.23827	2.23827
CG12223-RF	1	1	24	9	CG12223-RF	1	0.836218	0.820319	0.860228	0.775199	0.353549	1	0.68008	0.446773	0.851883	0.615676	0.749521	Dsp1	0.749121	18C	2.82846	2.23827	2.23827
CG12225-RA	0.248511	1	24	15	CG12225-RA	0.764669	0.872703	1	0.97874	0.804997	0.90867	0.650203	0.567303	1	0.861856	0.795946	0.790642	Spt6	0.832977	18C	1.53798	1.76273	1.53798
CG12230-RA	0.300911	1	24	7	CG12230-RA	0.91728	1	0.559803	0.712831	0.289697	0.792742	1	0.9996	0.809818	0.910634	0.972471	0.305917	car	0.772566	18C	3.45188	3.26886	3.26886
CG12230-RB	0.300911	1	24	7	CG12230-RB	0.91728	1	0.559803	0.712831	0.289697	0.792742	1	0.9996	0.809818	0.910634	0.972471	0.305917	car	0.772566	18C	3.45188	3.26886	3.26886
CG12233-RA	1	1	24	21	CG12233-RA	0.907501	1	0.856671	0.99276	0.902652	0.851902	0.606118	0.598991	0.557937	0.586551	1	0.605473	l(1)G0156	0.78888	18C	1.64984	1.79232	1.64984
CG12233-RB	1	1	24	21	CG12233-RB	0.907501	1	0.856671	0.99276	0.902652	0.851902	0.607091	0.598225	0.556884	0.587416	1	0.603303	l(1)G0156	0.7887	18C	1.6472	1.79571	1.6472
CG12234-RA	1	1	24	1	CG12234-RA	0.316471	0.533688	0.37248	0.292951	0.149923	1	0.252491	0.166348	0.399113	0.238139	0.566416	1	Ranbp21	0.440668	18C	6.6701	6.0115	6.0115
CG12235-RA	0.300911	1	24	7	CG12235-RA	0.800535	1	0.76773	0.853873	0.61802	0.749502	1	0.626949	0.735719	0.646519	0.516892	0.562141	Arp10	0.739823	18C	1.61807	1.93464	1.61807
CG12236-RA	0.576952	1	24	23	CG12236-RA	0.888798	0.698325	0.653811	0.75418	1	0.918152	0.272081	0.215105	0.319487	0.487568	0.232519	1	CG12236	0.620002	18C	3.67538	4.64889	3.67538
CG12236-RB	0.772187	1	24	15	CG12236-RB	0.578725	0.603312	0.499508	1	0.328993	0.450137	0.427025	0.125038	1	0.68617	0.459546	0.5412	CG12236	0.558305	18C	3.03958	7.99756	3.03958
CG12237-RA	1	1	24	1	CG12237-RA	1	0.863627	0.941584	0.891396	0.742182	0.891239	0.88215	0.684506	0.752543	0.90134	0.988423	1	CG12237	0.878249	18C	1.34738	1.46091	1.34738
CG12238-RA	0.00851692	1	24	21	CG12238-RA	0.407786	0.485421	0.338793	0.651338	1	0.746305	0.671112	0.317439	0.341952	0.340827	1	0.959593	e(y)3	0.605047	18C	2.95166	3.15021	2.95166
CG12239-RA	1	1	24	21	CG12239-RA	0.697931	0.709562	0.583663	0.808521	0.852685	1	0.928591	0.997239	0.950269	0.941619	0.802744	1	CG12239	0.856069	18C	1.71332	1.24573	1.24573
CG12240-RA	1	1	24	1	CG12240-RA	0.973682	1	0.857174	0.846767	0.540018	0.738867	0.573864	0.496226	0.660083	0.625813	1	0.892078	DnaJ-60	0.767048	18C	1.85179	2.01521	1.85179
CG12241-RA	1	1	24	3	CG12241-RA	0.514265	0.525602	0.538027	0.846303	0.812081	1	0.789034	0.808636	0.791891	0.496122	0.0749228	1	CG12241	0.683074	18C	1.94452	13.3471	1.94452
CG12244-RA	0.170207	1	24	23	CG12244-RA	0.822824	0.599186	0.685984	0.761672	0.877048	1	0.578625	0.242591	0.451378	0.272867	0.494491	1	lic	0.648889	18C	1.72823	4.12217	1.72823
CG12251-RA	1	1	24	9	CG12251-RA	0.849632	0.636798	1	0.854456	0.894441	0.458924	0.886473	0.981175	0.576514	0.267546	1	0.539276	AQP	0.745436	18C	2.17901	3.73767	2.17901
CG12251-RB	1	1	24	9	CG12251-RB	0.849632	0.636798	1	0.854456	0.894441	0.458924	0.886473	0.981175	0.576514	0.267546	1	0.539276	AQP	0.745436	18C	2.17901	3.73767	2.17901
CG12252-RA	1	1	24	15	CG12252-RA	0.351816	0.862971	0.644125	0.337731	1	0.570094	0.650423	0.419399	1	0.626503	0.614981	0.438472	Fcp1	0.626376	18C	2.96094	2.38436	2.38436
CG12253-RA	1	1	24	1	CG12253-RA	0.102853	0.504578	0.40352	0.507782	0	1	1	0.470591	0.387111	0.80842	0.732511	0.27158	CG12253	0.515745	18C	Inf	3.68216	3.68216
CG12254-RA	1	1	24	9	CG12254-RA	0.724764	1	0.568689	0.447267	0.228896	0.822103	0.830327	0.24313	1	0.739621	0.591328	0.292315	MED25	0.624037	18C	4.36879	4.11303	4.11303
CG12259-RA	0.576952	1	24	13	CG12259-RA	0.371714	0.846652	1	0.655406	0.301874	0.619548	0.828852	0.289096	0.858766	0.735753	1	0.216272	CG12259	0.643661	18C	3.31264	4.62381	3.31264
CG12261-RA	1	1	24	3	CG12261-RA	0.549579	1	0.834181	0.555994	0.631678	0.735805	1	0.942234	0.60049	0.985309	0.639753	0.856715	mRpS22	0.777645	18C	1.81957	1.66531	1.66531
CG12262-RA	0.0931041	1	24	13	CG12262-RA	0.798768	1	0.836915	0.904935	0.826422	0.62221	0.764204	0.820994	1	0.877538	0.808539	0.847961	CG12262	0.842374	18C	1.60717	1.2368	1.2368
CG12263-RA	1	1	24	1	CG12263-RA	0.59014	0.661741	0.747504	0.679817	0.686941	1	1	0.48314	0.632281	0.66021	0.854596	0.549195	CG12263	0.71213	18C	1.69451	2.06979	1.69451
CG12264-RA	1	1	24	21	CG12264-RA	0.736205	0.86709	0.843575	1	0.863607	0.863485	0.53934	0.473776	0.663084	0.810123	0.401169	1	CG12264	0.755121	18C	1.85412	2.49272	1.85412
CG12265-RA	1	1	24	13	CG12265-RA	0.308559	0.378433	0	0.592412	0.389799	1	0.265067	0.548848	0.307831	1	0.129443	0.0959825	Det	0.418031	18C	Inf	10.4186	10.4186
CG12267-RA	1	1	24	13	CG12267-RA	0.467432	0.917253	0.513481	1	0.3543	0.181786	0.728339	0.719775	0.16447	0.858673	0.622436	1	CG12267	0.627329	18C	5.50097	6.08015	5.50097
CG12268-RA	0.421631	1	24	5	CG12268-RA	0.914721	0.589697	0.607317	0.385978	1	0.114019	1	0.841835	0.802897	0.270721	0.530166	0.774505	CG12268	0.652655	18C	8.77048	3.69384	3.69384
CG12268-RB	0.421631	1	24	5	CG12268-RB	0.914721	0.589697	0.607317	0.385978	1	0.114019	1	0.841835	0.802897	0.270721	0.530166	0.774505	CG12268	0.652655	18C	8.77048	3.69384	3.69384
CG12269-RA	1	1	24	9	CG12269-RA	0.951903	0.902131	1	0.783251	0.924256	0.657792	1	0.774834	0.828237	0.889889	0.83756	0.816844	CG12269	0.863891	18C	1.52024	1.2906	1.2906
CG1227-RA	1	1	24	15	CG1227-RA	0.695154	0.521017	1	0.889764	0.439089	0.22529	0.730587	0.385065	0.554324	0.565028	0.736741	1	CG1227	0.645172	18C	4.43872	2.59697	2.59697
CG12272-RA	1	1	24	9	CG12272-RA	0.710476	0.873254	0.866023	0.822409	1	0.714725	1	0.617651	0.606877	0.60421	0.413945	0.435659	CG12272	0.722102	18C	1.40751	2.41578	1.40751
CG12273-RA	0.772187	1	24	21	CG12273-RA	0.654377	0.983786	0.612838	0.851081	1	0.985123	0.619483	0.580804	0.591835	1	0.722845	0.452951	angel	0.754594	18C	1.63175	2.20774	1.63175
CG12276-RA	1	1	24	19	CG12276-RA	0.440031	0.719569	0.608335	1	0.357355	0.570433	0.585072	0.735066	0.602212	0.680144	1	0.948435	Aos1	0.687221	18C	2.79834	1.66055	1.66055
CG12279-RA	1	1	24	21	CG12279-RA	0.930901	0.93783	1	0.975701	0.944997	0.926628	0.737124	0.622437	0.80179	0.768663	0.709795	1	CG12279	0.862989	18C	1.35662	1.60659	1.35662
CG1228-RA	0.027207	1	24	19	CG1228-RA	0.706583	0.537286	0.665307	1	0.91047	0.824379	0.772599	0.53067	0.734977	1	0.758597	0.79167	Ptpmeg	0.769378	18C	1.86121	1.88441	1.86121
CG1228-RC	0.0155956	1	24	19	CG1228-RC	0.706583	0.537286	0.665307	1	0.91047	0.824379	0.756161	0.53067	0.734977	1	0.772645	0.79167	Ptpmeg	0.769179	18C	1.86121	1.88441	1.86121
CG1228-RD	0.027207	1	24	19	CG1228-RD	0.706583	0.537286	0.665307	1	0.91047	0.824379	0.772599	0.53067	0.734977	1	0.758597	0.79167	Ptpmeg	0.769378	18C	1.86121	1.88441	1.86121
CG12283-RA	1	1	24	13	CG12283-RA	1	0.484126	0.33038	0.822827	0.797866	0.511716	0.233515	1	0.896429	0.936026	0.349232	0.665889	kek1	0.669001	18C	4.28238	2.86343	2.86343
CG12284-RA	0.0155956	1	24	23	CG12284-RA	0.926808	0.790135	0.749394	0.837003	0.813866	1	0.984008	0.686426	0.8668	0.910834	0.999742	1	th	0.880418	18C	1.33441	1.45682	1.33441
CG12284-RB	0.0155956	1	24	23	CG12284-RB	0.926808	0.790135	0.749394	0.837003	0.813866	1	0.984008	0.686426	0.8668	0.910834	0.999742	1	th	0.880418	18C	1.33441	1.45682	1.33441
CG12284-RC	0.0155956	1	24	23	CG12284-RC	0.926808	0.790135	0.749394	0.837003	0.813866	1	0.984008	0.686426	0.8668	0.910834	0.999742	1	th	0.880418	18C	1.33441	1.45682	1.33441
CG12286-RA	1	1	24	3	CG12286-RA	0.75264	1	0.516741	0.774115	0.59425	0.670782	0.574729	0.628939	0.51033	0.716621	0.366289	1	kar	0.675453	18C	1.93521	2.73008	1.93521
CG12290-RA	1	1	24	1	CG12290-RA	0.444742	1	0.465291	0.487927	0.842755	0	0.950887	0.3199	0.657879	0.648775	0.622436	1	CG12290	0.620049	18C	Inf	3.12598	3.12598
CG12295-RB	1	1	24	21	CG12295-RB	0.671648	0.500131	0.790516	0.6316	1	0.559729	0.439605	0.698067	0.610888	0.510297	0.703204	1	stj	0.676307	18C	2.27477	1.95964	1.95964
CG12296-RA	0.576952	1	24	3	CG12296-RA	0.69888	1	0.365586	0.191686	0.441443	0.452996	0.789034	0.909715	0.267263	0.930229	0.590017	1	klu	0.636404	18C	5.21687	3.74163	3.74163
CG12297-RA	0.0214013	1	24	13	CG12297-RA	0.214469	0.350714	0.61704	1	0.406403	0.139013	0.149608	0.157706	1	0.253988	0.460277	0.0758438	Fadd	0.402088	18C	7.19357	13.185	7.19357
CG12299-RA	0.421631	1	24	3	CG12299-RA	0.850221	0.791056	0.805156	0.554843	1	0.798132	1	0.668661	0.754962	0.774233	0.727044	0.85122	CG12299	0.797961	18C	1.80231	1.49553	1.49553
CG12304-RA	0.489949	1	24	7	CG12304-RA	0.924074	1	0.781947	0.879624	0.858361	0.634194	0.648851	1	0.418629	0.387944	0.608966	0.491933	CG12304	0.719544	18C	1.57681	2.57769	1.57681
CG12304-RB	0.489949	1	24	7	CG12304-RB	0.934457	1	0.80511	0.889508	0.868006	0.64132	0.648851	1	0.418629	0.387944	0.608966	0.491933	CG12304	0.72456	18C	1.55929	2.57769	1.55929
CG1231-RA	1	1	24	9	CG1231-RA	0.695154	0.284191	1	0.571991	0	0.45058	1	0.608148	0.416889	0.652955	0.591643	0.0974902	CG1231	0.530753	18C	Inf	10.2574	10.2574
CG12311-RA	1	1	24	3	CG12311-RA	0.754985	0.577044	0.48079	0.918328	0.684222	1	0.157807	0.914914	0.484637	0.178604	0.107889	1	tw	0.604935	18C	6.33686	9.2688	6.33686
CG12316-RA	0.300911	1	24	9	CG12316-RA	0.283211	0.521017	1	0.233033	0.268332	0	0.510552	0.672731	0.46116	0.393979	0.23799	1	CG12316	0.465167	18C	Inf	4.20186	4.20186
CG12316-RB	0.300911	1	24	9	CG12316-RB	0.283211	0.521017	1	0.233033	0.268332	0	0.510552	0.672731	0.46116	0.393979	0.23799	1	CG12316	0.465167	18C	Inf	4.20186	4.20186
CG12317-RA	1	1	24	5	CG12317-RA	0.655105	0.608171	0.685374	0.696258	1	0.937707	0.452125	1	0.612579	0.380736	0.607175	0.450223	JhI-21	0.673788	18C	2.21178	2.62649	2.21178
CG12317-RB	1	1	24	5	CG12317-RB	0.655105	0.608171	0.685374	0.696258	1	0.937707	0.452125	1	0.612579	0.380736	0.607175	0.450223	JhI-21	0.673788	18C	2.21178	2.62649	2.21178
CG12320-RA	1	1	24	1	CG12320-RA	0.632942	0.679239	0.86912	0.520802	0.899536	1	1	0	0.522939	0.0496398	0.449787	0.400223	CG12320	0.585352	18C	1.92012	Inf	1.92012
CG12321-RA	0.772187	1	24	11	CG12321-RA	0.896161	1	0.899143	0.562105	0.89084	0.599913	0.419311	0.48891	1	0.46376	0.358342	0.546716	CG12321	0.6771	18C	2.38486	2.79063	2.38486
CG12323-RA	0.248511	1	24	11	CG12323-RA	0.742397	0.97501	1	0.57014	0.890968	0.781954	0.629831	0.949774	1	0.764317	0.714079	0.709538	Prosbeta5	0.810667	18C	1.75396	1.40937	1.40937
CG12323-RB	0.248511	1	24	11	CG12323-RB	0.742397	0.97501	1	0.57014	0.890968	0.781954	0.629831	0.949774	1	0.764317	0.714079	0.709538	Prosbeta5	0.810667	18C	1.75396	1.40937	1.40937
CG12324-RA	1	1	24	13	CG12324-RA	0.691189	0.884845	0.968353	1	0.724124	0.641562	0.895345	1	0.763267	0.9219	0.827412	0.923231	RpS15Ab	0.853436	18C	1.5587	1.31016	1.31016
CG12325-RA	1	1	24	1	CG12325-RA	0.420763	0.487376	0.440204	0.115405	0.354363	1	0	0.259919	0.534527	0.248061	0.674305	1	CG12325	0.461243	18C	Inf	4.03127	4.03127
CG1233-RA	1	1	24	9	CG1233-RA	1	0.919839	0.941584	0.575979	0.189493	0.972261	0.372319	0.911091	0.912814	0	1	0.269638	CG1233	0.672085	18C	5.27724	Inf	5.27724
CG1233-RB	1	1	24	9	CG1233-RB	1	0.919839	0.941584	0.575979	0.189493	0.972261	0.372319	0.911091	0.912814	0	1	0.269638	CG1233	0.672085	18C	5.27724	Inf	5.27724
CG12333-RA	1	1	24	1	CG12333-RA	0.80214	0.763729	0.728781	0.434225	1	0.574655	0.969619	0.619743	1	0.716588	0.810081	0.862042	CG12333	0.773467	18C	2.30295	1.61357	1.61357
CG12338-RA	0.0729854	1	24	23	CG12338-RA	0.92304	0.792446	0.8536	0.965653	0.980744	1	0.655274	0.871346	0.586452	0.656298	0.893936	1	CG12338	0.848233	18C	1.52608	1.70517	1.52608
CG1234-RA	1	1	24	21	CG1234-RA	0.405107	0.558951	0.238402	1	0.767651	0.196935	0.789034	0.179254	0.516095	0.461907	0.162763	1	CG1234	0.523008	18C	5.07782	6.14389	5.07782
CG12340-RA	1	1	24	3	CG12340-RA	0.79653	0.537299	1	0.393244	0	0.929322	0.240141	0.27122	0.0619741	0.711827	0.557035	1	wde	0.541549	18C	Inf	16.1358	16.1358
CG12341-RA	1	1	24	13	CG12341-RA	0.678502	0.878381	0.709851	0.992515	1	0.732978	0.260495	0.858105	1	0.460664	0.723507	0.701555	CG12341	0.749713	18C	3.83885	2.17078	2.17078
CG12343-RA	0.300911	1	24	19	CG12343-RA	0.611094	0.888427	0.87818	1	0.806684	0.907904	0.552203	0.433103	0.760049	0.855623	1	0.833151	CG12343	0.793868	18C	1.81093	2.30892	1.81093
CG12344-RA	1	1	24	3	CG12344-RA	0.420763	0.487376	0.550254	0.115405	0.354363	1	0.290697	0.492478	0.937766	0.195838	0.425877	1	CG12344	0.522568	18C	8.66514	5.10627	5.10627
CG12345-RA	0.663955	1	24	17	CG12345-RA	0.676714	0.914647	0.769387	1	0.837437	0.859353	0.87114	0.838241	0.916283	1	0.896306	0.929734	Cha	0.87577	18C	1.47773	1.19297	1.19297
CG12345-RB	1	1	24	1	CG12345-RB	0.96446	0.915046	0.571145	0.778611	1	0.530778	0.87114	0.838241	0.916283	1	0.896306	0.929734	Cha	0.850979	18C	1.88403	1.19297	1.19297
CG12346-RA	1	1	24	9	CG12346-RA	0.879539	0.862971	0.460089	0.482472	1	0.570094	0.902084	0.48626	1	0.618768	0.490583	0.207868	cag	0.663394	18C	2.17349	4.81074	2.17349
CG12348-RA	0.170207	1	24	21	CG12348-RA	0.527724	0.399758	0.560226	0.600252	1	0.845081	0.754932	0.630002	0.704629	0.783221	1	0.494336	Sh	0.69168	18C	2.50151	2.02292	2.02292
CG12348-RB	1	1	24	3	CG12348-RB	0.499572	0.459526	0.230583	0.217621	0.334113	1	0.646846	0.868711	1	0.715668	0.712251	0.362602	Sh	0.587291	18C	4.59515	2.75785	2.75785
CG12348-RC	1	1	24	1	CG12348-RC	0.45736	0.30204	0.082816	0.0578967	1	0.478879	1	0.564709	0.365605	0.943157	0.895291	0.512984	Sh	0.555061	18C	17.2721	2.73519	2.73519
CG12348-RD	1	1	24	21	CG12348-RD	0.529849	0.58294	0.733673	0.551379	0.826846	1	0.932435	0.663855	0.991658	1	0.674756	0.829126	Sh	0.776377	18C	1.88733	1.50635	1.50635
CG12348-RE	1	1	24	1	CG12348-RE	0.45736	0.30204	0.082816	0.0578967	1	0.478879	1	0.564709	0.365605	0.943157	0.895291	0.512984	Sh	0.555061	18C	17.2721	2.73519	2.73519
CG12348-RF	0.170207	1	24	21	CG12348-RF	0.527724	0.399758	0.560226	0.600252	1	0.845081	0.754932	0.630002	0.704629	0.783221	1	0.494336	Sh	0.69168	18C	2.50151	2.02292	2.02292
CG12348-RG	1	1	24	15	CG12348-RG	0.529849	0.58294	0.733673	0.551379	0.826846	1	0.646846	0.868711	1	0.715668	0.712251	0.362602	Sh	0.710897	18C	1.88733	2.75785	1.88733
CG12352-RA	1	1	24	3	CG12352-RA	0.61069	0.581447	0.66833	0.621503	0.274077	1	0.777717	0.892146	1	0.638584	0.609899	0.997252	san	0.722637	18C	3.6486	1.63962	1.63962
CG12355-RA	0.0155956	1	24	21	CG12355-RA	0.675486	0.647228	0.712218	0.677391	1	0.985123	0.700314	0.584033	0.880786	0.735753	1	0.775209	CG12355	0.781128	18C	1.54505	1.71223	1.54505
CG12355-RB	0.0155956	1	24	21	CG12355-RB	0.675486	0.647228	0.712218	0.677391	1	0.985123	0.700314	0.584033	0.880786	0.735753	1	0.775209	CG12355	0.781128	18C	1.54505	1.71223	1.54505
CG12357-RA	1	1	24	21	CG12357-RA	0.334272	0.741098	0.726336	0.803987	0.974497	1	0.610439	1	0.551384	0.669103	0.704971	0.439101	Cbp20	0.712932	18C	2.99157	2.27738	2.27738
CG12358-RA	0.772187	1	24	9	CG12358-RA	1	0.639507	0.728607	0.470187	0.541409	0.694472	0.598924	0.89679	1	0.958583	0.612655	0.402532	Paip2	0.711972	18C	2.12681	2.48428	2.12681
CG12359-RA	1	1	24	7	CG12359-RA	0.385699	0.315361	0.30264	0.581833	0.243624	1	1	0.279503	0.903259	0.771674	0.388453	0.192026	Ulp1	0.530339	18C	4.10468	5.20763	4.10468
CG1236-RA	0.300911	1	24	15	CG1236-RA	0.546192	0.558232	1	0.599229	0	0.708055	0.546964	0.56548	0.554856	1	0.812615	0.554566	CG1236	0.620516	18C	Inf	1.80321	1.80321
CG12360-RA	1	1	24	21	CG12360-RA	0.841525	0.709562	0.843724	0.836686	0.753021	1	0.677378	0.529646	0.867345	0.807368	0.795171	1	CG12360	0.805119	18C	1.47628	1.88805	1.47628
CG12360-RB	1	1	24	21	CG12360-RB	0.841525	0.709562	0.843724	0.836686	0.753021	1	0.677378	0.529646	0.867345	0.807368	0.795171	1	CG12360	0.805119	18C	1.47628	1.88805	1.47628
CG12363-RA	0.421631	1	24	11	CG12363-RA	0.674193	0.810547	0.6543	1	0.672395	0.603743	0.818293	0.935521	1	0.794478	0.57933	0.737142	Dlc90F	0.773328	18C	1.65634	1.72613	1.65634
CG12366-RA	0.300911	1	24	23	CG12366-RA	0.844358	0.45306	0.041408	0.738183	1	0.410468	0.151737	0.15995	0.191881	0.343469	0.311218	1	O-fut1	0.470478	18C	24.1499	6.25196	6.25196
CG12367-RA	0.353312	1	24	11	CG12367-RA	0.326144	1	0.127955	0.6709	0.61802	0	0.17857	1	0.241943	0.50526	0.114454	0.113158	Hen1	0.408034	18C	Inf	8.83724	8.83724
CG12369-RA	0.0592039	1	24	13	CG12369-RA	0.252237	0.871823	0.755688	1	0.782135	0.49048	0.733777	0.576727	1	0.898473	0.495065	0.717871	Lac	0.714523	18C	3.96453	2.01994	2.01994
CG12369-RB	0.0592039	1	24	13	CG12369-RB	0.252237	0.871823	0.755688	1	0.782135	0.49048	0.733777	0.576727	1	0.898473	0.495065	0.717871	Lac	0.714523	18C	3.96453	2.01994	2.01994
CG12370-RB	1	1	24	13	CG12370-RB	0.557878	1	0.976498	0.600279	0.406592	0.667572	0.289164	0	0.130595	1	0.453051	0.549718	Dh44-R2	0.552612	18C	3.45824	Inf	3.45824
CG12373-RA	1	1	24	21	CG12373-RA	0.923516	0.950616	0.948933	0.913682	1	0.983413	0.443424	0.945159	0.795163	0.965593	0.735606	1	mRpL18	0.883759	18C	2.25518	1.35942	1.35942
CG12375-RA	0.353312	1	24	13	CG12375-RA	0.356096	0.60913	1	0.539746	0.497204	0.473772	0.926597	0.887952	1	0.896625	0.771298	0.854067	CG12375	0.734374	18C	2.80823	1.29652	1.29652
CG12379-RB	1	1	24	21	CG12379-RB	0.811998	0.946083	0.552185	0.467694	0.820629	1	0.586935	0.474005	0.68407	1	0.776658	0.671878	CG12379	0.732678	18C	2.13815	2.10968	2.10968
CG12384-RA	1	1	24	3	CG12384-RA	0.992612	1	0.971252	0.999057	0.906878	0.827209	0.834221	0.901128	0.667962	0.849909	0.878528	1	CG12384	0.902396	18C	1.20888	1.49709	1.20888
CG12389-RA	0.209359	1	24	17	CG12389-RA	0.487129	0.622335	0.41408	0.768244	1	0.394681	0.23594	0.334802	1	0.77029	0.558369	0.598047	Fpps	0.59866	18C	4.23837	2.98684	2.98684
CG1239-RA	1	1	24	23	CG1239-RA	1	0.536573	0.882735	0.822827	0.473733	0.243065	0.394517	0.462078	0.158378	0.537465	0.711767	1	CG1239	0.601928	18C	4.11412	6.314	4.11412
CG12390-RA	1	1	24	1	CG12390-RA	0.967493	0.701164	0.552107	0.361854	1	0.684113	0.994002	0.611218	0.598561	1	0.698453	0.671878	dare	0.736737	18C	2.76354	1.67067	1.67067
CG12391-RA	1	1	24	1	CG12391-RA	0.822824	0.126144	0.242112	0.423151	0.389799	1	0.569259	0.625073	0.42849	0.328106	1	0	CG12391	0.496247	18C	7.92742	Inf	7.92742
CG12393-RA	1	1	24	3	CG12393-RA	0.735812	1	0.780213	0.801807	0.640631	0.502715	0.874007	0.303905	0.61402	0.652591	0.674305	1	CG12393	0.715001	18C	1.9892	3.2905	1.9892
CG12393-RB	1	1	24	3	CG12393-RB	0.735812	1	0.780213	0.801807	0.640631	0.502715	0.874007	0.303905	0.61402	0.652591	0.674305	1	CG12393	0.715001	18C	1.9892	3.2905	1.9892
CG12393-RC	1	1	24	3	CG12393-RC	0.75264	1	0.754606	0.73971	0.59425	0.365881	0.874007	0.303905	0.61402	0.652591	0.674305	1	CG12393	0.693826	18C	2.73313	3.2905	2.73313
CG12396-RA	1	1	24	15	CG12396-RA	0	0.315361	0.70616	0.317363	0.243624	1	0.324496	0.477876	1	0.774127	0.636187	0.435448	Nnp-1	0.51922	18C	Inf	2.29648	2.29648
CG12399-RA	1	1	24	13	CG12399-RA	0.370618	1	0.930581	0.731891	0.140459	0.57654	0.455354	1	0.329042	0.959151	0.700459	0.500156	Mad	0.641188	18C	7.11951	3.03912	3.03912
CG1240-RA	0.0729854	1	24	11	CG1240-RA	0.898382	0.973704	1	0.87674	0.989751	0.446887	0.738068	0.810433	1	0.64455	0.712514	0.640927	Non2	0.810996	18C	2.2377	1.56024	1.56024
CG12400-RA	1	1	24	21	CG12400-RA	0.854366	0.9259	0.936166	0.943345	0.815979	1	0.692325	0.831852	0.788356	0.79471	1	0.801736	CG12400	0.865395	18C	1.44441	1.26846	1.26846
CG12403-RA	1	1	24	9	CG12403-RA	0.728118	0.702537	0.799049	0.728993	0.617503	1	1	0.670386	0.925048	0.783896	0.695296	0.669817	Vha68-1	0.77672	18C	1.61942	1.49294	1.49294
CG12404-RA	0.421631	1	24	23	CG12404-RA	0.339251	0.670343	0.561966	0.666846	1	0.69633	0.620386	0.507933	0.495083	0.528313	0.591947	1	CG12404	0.639866	18C	2.94767	2.01986	2.01986
CG12405-RA	1	1	24	21	CG12405-RA	0.585085	0.710544	0.715638	0.599419	1	0.736165	0.599426	0.85221	1	0.757733	0.841126	0.954506	Prx2540-1	0.779321	18C	1.70915	1.31973	1.31973
CG1241-RA	0.772187	1	24	1	CG1241-RA	0.694258	0.946083	0.665808	0.930933	0.633423	1	1	0.907238	0.599705	0.927695	0.88962	0.945335	Atg2	0.845008	18C	1.57872	1.66749	1.57872
CG12410-RA	1	1	24	3	CG12410-RA	0.662903	0.636865	0.745547	1	0.628078	0.988256	0.691163	1	0.893605	0.34511	0.440103	0.824434	cv	0.738005	18C	1.59216	2.89762	1.59216
CG12413-RA	1	1	24	1	CG12413-RA	1	0.426592	0.341154	0.465076	0.823883	0.591811	0.516648	0.048626	1	0.97456	0.662287	0.935407	CG12413	0.648837	18C	2.93123	20.5651	2.93123
CG1242-RA	1	1	24	13	CG1242-RA	0.621575	1	0.634993	0.728062	0.706705	0.7015	0.642012	0.771775	1	0.614367	0.673513	0.793284	Hsp83	0.740649	18C	1.60882	1.62769	1.60882
CG12424-RA	1	1	24	21	CG12424-RA	0.570752	1	0.383865	0.53672	0.463515	0.792742	0.753969	0.248368	0.872569	1	0.966508	0.686808	ckn	0.689651	18C	2.60508	4.02629	2.60508
CG12424-RB	1	1	24	21	CG12424-RB	0.570752	1	0.383865	0.53672	0.463515	0.792742	0.753969	0.248368	0.872569	1	0.966508	0.686808	ckn	0.689651	18C	2.60508	4.02629	2.60508
CG12424-RC	1	1	24	21	CG12424-RC	0.570752	1	0.383865	0.53672	0.463515	0.792742	0.753969	0.248368	0.872569	1	0.966508	0.686808	ckn	0.689651	18C	2.60508	4.02629	2.60508
CG12428-RA	1	1	24	13	CG12428-RA	0.55234	1	0.330206	0.389555	0.149521	0.460302	0.673888	0.697677	1	0.930674	0.822717	0.579546	CG12428	0.632202	18C	6.68802	1.72549	1.72549
CG12428-RB	1	1	24	13	CG12428-RB	0.55234	1	0.330206	0.389555	0.149521	0.460302	0.673888	0.697677	1	0.930674	0.822717	0.579546	CG12428	0.632202	18C	6.68802	1.72549	1.72549
CG12428-RD	1	1	24	13	CG12428-RD	0.55234	1	0.330206	0.389555	0.149521	0.460302	0.673888	0.697677	1	0.930674	0.822717	0.579546	CG12428	0.632202	18C	6.68802	1.72549	1.72549
CG12428-RE	1	1	24	13	CG12428-RE	0.55234	1	0.330206	0.389555	0.149521	0.460302	0.673888	0.697677	1	0.930674	0.822717	0.579546	CG12428	0.632202	18C	6.68802	1.72549	1.72549
CG12437-RA	1	1	24	9	CG12437-RA	0.649598	0.597526	0.722088	0.668134	0.666761	1	0.910709	1	0.920535	0.654431	0.796819	0.384736	raw	0.747611	18C	1.67357	2.59919	1.67357
CG12437-RB	1	1	24	9	CG12437-RB	0.649598	0.597526	0.722088	0.668134	0.666761	1	0.910709	1	0.920535	0.654431	0.796819	0.384736	raw	0.747611	18C	1.67357	2.59919	1.67357
CG1244-RB	1	1	24	3	CG1244-RB	0.782578	0.795258	0.561419	0.8647	0.423695	1	0.450877	0.29705	0.780578	0.354373	0.288988	1	MEP-1	0.633293	18C	2.36019	3.46035	2.36019
CG1244-RD	1	1	24	3	CG1244-RD	0.782578	0.795258	0.561419	0.8647	0.423695	1	0.450877	0.29705	0.780578	0.354373	0.288988	1	MEP-1	0.633293	18C	2.36019	3.46035	2.36019
CG1244-RE	1	1	24	3	CG1244-RE	0.782578	0.795258	0.561419	0.8647	0.423695	1	0.450877	0.29705	0.780578	0.354373	0.288988	1	MEP-1	0.633293	18C	2.36019	3.46035	2.36019
CG1244-RF	1	1	24	3	CG1244-RF	0.782578	0.795258	0.561419	0.8647	0.423695	1	0.450877	0.29705	0.780578	0.354373	0.288988	1	MEP-1	0.633293	18C	2.36019	3.46035	2.36019
CG12449-RA	0.141715	1	24	13	CG12449-RA	0.791021	1	0.954888	0.911222	0.830176	0.615263	0.444848	0.617006	1	0.776031	0.600261	0.720631	Gfat1	0.771779	18C	2.24796	1.66594	1.66594
CG12449-RB	0.141715	1	24	13	CG12449-RB	0.791021	1	0.954888	0.911222	0.830176	0.615263	0.444848	0.617006	1	0.776031	0.600261	0.720631	Gfat1	0.771779	18C	2.24796	1.66594	1.66594
CG12449-RC	0.141715	1	24	13	CG12449-RC	0.791021	1	0.954888	0.911222	0.830176	0.615263	0.444848	0.617006	1	0.776031	0.600261	0.720631	Gfat1	0.771779	18C	2.24796	1.66594	1.66594
CG12449-RD	0.141715	1	24	13	CG12449-RD	0.791021	1	0.954888	0.911222	0.830176	0.615263	0.444848	0.617006	1	0.776031	0.600261	0.720631	Gfat1	0.771779	18C	2.24796	1.66594	1.66594
CG12449-RE	0.141715	1	24	13	CG12449-RE	0.791021	1	0.954888	0.911222	0.830176	0.615263	0.444848	0.617006	1	0.776031	0.600261	0.720631	Gfat1	0.771779	18C	2.24796	1.66594	1.66594
CG12449-RF	0.141715	1	24	13	CG12449-RF	0.791021	1	0.954888	0.911222	0.830176	0.615263	0.444848	0.617006	1	0.776031	0.600261	0.720631	Gfat1	0.771779	18C	2.24796	1.66594	1.66594
CG12449-RH	0.141715	1	24	13	CG12449-RH	0.791021	1	0.954888	0.911222	0.830176	0.615263	0.444848	0.617006	1	0.776031	0.600261	0.720631	Gfat1	0.771779	18C	2.24796	1.66594	1.66594
CG1245-RA	1	1	24	1	CG1245-RA	0.874251	0.56765	0.968448	0.423151	0.779598	1	0.715088	0.856581	0.763348	0.797066	1	0.576725	MED27	0.776825	18C	2.36322	1.73393	1.73393
CG12473-RB	0.353312	1	24	15	CG12473-RB	0.789516	0.696309	0.856158	1	0.806874	0.689991	0.74397	0.686794	0.77662	1	0.711937	0.728338	stnB	0.790542	18C	1.44929	1.45604	1.44929
CG12478-RA	0.170207	1	24	23	CG12478-RA	0.293866	0.270309	0.288229	0.302251	0.556856	1	0.69435	0.47825	0.698448	0.431626	0.822652	1	bru-3	0.569736	18C	3.69946	2.31682	2.31682
CG12478-RB	0.170207	1	24	23	CG12478-RB	0.293866	0.270309	0.288229	0.302251	0.556856	1	0.69435	0.47825	0.698448	0.431626	0.822652	1	bru-3	0.569736	18C	3.69946	2.31682	2.31682
CG12483-RA	1	1	24	9	CG12483-RA	0.762267	0.359571	0.322062	0.385978	1	0.114019	1	0.861543	0.903259	0.181376	0.164345	0.29247	CG12483	0.528908	18C	8.77048	6.08475	6.08475
CG12484-RA	1	1	24	1	CG12484-RA	0.820903	0.827014	0.644125	0.241236	1	0.456076	0.526023	0.373217	0.7858	0.305306	0.518696	1	CG12484	0.624866	18C	4.14532	3.2754	3.2754
CG12484-RB	1	1	24	21	CG12484-RB	0.171422	0.315361	0.134507	0.705252	0	1	0.553551	0.683803	1	0.636292	0.443496	0.701555	CG12484	0.52877	18C	Inf	2.25481	2.25481
CG12484-RC	0.489949	1	24	9	CG12484-RC	0.831162	0.815505	1	0.455935	0.524998	0.646485	0.520989	0.643579	1	0.598863	0.445235	0.701555	CG12484	0.682026	18C	2.1933	2.246	2.1933
CG12484-RD	1	1	24	21	CG12484-RD	0.171422	0.315361	0.134507	0.705252	0	1	0.553551	0.683803	1	0.636292	0.443496	0.701555	CG12484	0.52877	18C	Inf	2.25481	2.25481
CG12488-RA	0.353312	1	24	5	CG12488-RA	1	0.613226	0.495571	0.952747	0.2992	0.921089	1	0.512421	0.585445	0.454112	0.332343	0.422457	CG42663	0.632384	18C	3.34225	3.00894	3.00894
CG1249-RA	1	1	24	15	CG1249-RA	0.710028	0.888467	0.722758	0.72634	1	0.820936	0.906256	0.645477	1	0.961007	0.862397	0.84435	SmD2	0.840668	18C	1.4084	1.54924	1.4084
CG12499-RA	1	1	24	13	CG12499-RA	0.37632	1	0.656179	0.481672	0.4754	0.650455	0.615865	0.933223	0.639729	0.8132	1	0.468318	CG12499	0.675863	18C	2.65731	2.1353	2.1353
CG1250-RA	1	1	24	13	CG1250-RA	0.781288	0.903631	0.77212	0.744584	0.646542	1	0.628442	1	0.798553	0.868987	0.771461	0.634476	Sec23	0.79584	18C	1.59124	1.5761	1.5761
CG1250-RB	1	1	24	13	CG1250-RB	0.781288	0.903631	0.77212	0.744584	0.646542	1	0.628442	1	0.798553	0.868987	0.771461	0.634476	Sec23	0.79584	18C	1.59124	1.5761	1.5761
CG12500-RA	0.353312	1	24	15	CG12500-RA	0.789516	0.696309	0.863119	1	0.806874	0.689991	0.74397	0.686794	0.77662	1	0.711937	0.728338	stnB	0.791122	18C	1.44929	1.45604	1.44929
CG12502-RB	0.300911	1	24	1	CG12502-RB	0.959497	0.676647	0.527011	0.355275	1	0.746305	0.705094	0.619381	0.697538	0.712516	0.55953	1	CG12502	0.713233	18C	2.81472	1.78721	1.78721
CG12505-RA	1	1	24	13	CG12505-RA	0.850424	0.798897	0.939409	1	0.851464	0.94998	0.758924	1	0.879939	0.835516	0.811306	0.891887	Arc1	0.880646	18C	1.31765	1.23258	1.23258
CG12512-RA	1	1	24	21	CG12512-RA	0.909854	0.715627	0.74496	0.667277	0.674652	1	0.466476	0.854266	0.592745	0.984318	1	0.541097	CG12512	0.762606	18C	2.14373	1.8481	1.8481
CG1252-RA	1	1	24	9	CG1252-RA	0.292133	0.861044	0.628514	0.139572	1	0.403138	0.438815	0.180358	1	0.369826	0.262851	0.107147	Ccp84Ab	0.473617	18C	7.16474	9.333	7.16474
CG12529-RA	0.880418	1	24	7	CG12529-RA	0.67181	1	0.657796	0.694523	0.816048	0.703419	0.795353	1	0.82809	0.718648	0.596687	0.865655	Zw	0.779002	18C	1.52023	1.67592	1.52023
CG12529-RB	0.880418	1	24	7	CG12529-RB	0.67181	1	0.657796	0.694523	0.816048	0.703419	0.795353	1	0.82809	0.718648	0.596687	0.865655	Zw	0.779002	18C	1.52023	1.67592	1.52023
CG12530-RA	0.209359	1	24	15	CG12530-RA	0.580496	0.970842	0.93168	0.933584	1	0.66701	0.604453	0.378645	0.662333	1	0.7198	0.276286	Cdc42	0.727094	18C	1.72267	3.61944	1.72267
CG12532-RA	1	1	24	23	CG12532-RA	0.750991	0.886014	0.922331	0.839586	0.773411	1	0.886998	0.612931	0.871652	0.724853	1	0.717703	AP-1-2beta	0.832206	18C	1.33157	1.6315	1.33157
CG12534-RA	1	1	24	3	CG12534-RA	1	0.828991	0.595755	0.502839	0.456187	0.792213	0.641748	0.471319	0.646183	0.793795	0.602379	1	Alr	0.694284	18C	2.19208	2.1217	2.1217
CG12537-RA	0.300911	1	24	23	CG12537-RA	0.988972	0.606463	0.83808	0.846303	0.599691	1	0.949362	0.640012	0.358962	0.937044	1	0.727513	rdx	0.791033	18C	1.66753	2.78581	1.66753
CG12537-RB	0.421631	1	24	23	CG12537-RB	0.988972	0.606463	0.83808	0.846303	0.599691	1	0.949362	0.640012	0.358962	0.957867	1	0.727513	rdx	0.792769	18C	1.66753	2.78581	1.66753
CG12537-RC	0.300911	1	24	23	CG12537-RC	0.988972	0.606463	0.83808	0.846303	0.599691	1	0.949362	0.640012	0.358962	0.937044	1	0.727513	rdx	0.791033	18C	1.66753	2.78581	1.66753
CG12537-RD	0.300911	1	24	23	CG12537-RD	0.988972	0.606463	0.83808	0.846303	0.599691	1	0.986592	0.695342	0.373039	0.952151	1	0.785122	rdx	0.80598	18C	1.66753	2.68069	1.66753
CG12537-RE	0.300911	1	24	23	CG12537-RE	0.988972	0.606463	0.83808	0.846303	0.599691	1	0.949362	0.640012	0.358962	0.937044	1	0.727513	rdx	0.791033	18C	1.66753	2.78581	1.66753
CG12547-RA	0.772187	1	24	1	CG12547-RA	0.794774	0.573384	0.440204	0.307746	0.708725	1	0.940239	0.790794	0.650511	1	0.786428	0.608493	CG12547	0.716775	18C	3.24943	1.6434	1.6434
CG12559-RB	1	1	24	1	CG12559-RB	1	0.306613	0.653878	0.685689	0.947466	0.324087	0.781922	1	0.664732	0.455499	0.805803	0.699519	rl	0.693767	18C	3.26144	2.19539	2.19539
CG12559-RC	1	1	24	1	CG12559-RC	1	0.306613	0.653878	0.685689	0.947466	0.324087	0.781922	1	0.664732	0.455499	0.805803	0.699519	rl	0.693767	18C	3.26144	2.19539	2.19539
CG12559-RD	1	1	24	1	CG12559-RD	1	0.306613	0.653878	0.685689	0.947466	0.324087	0.781922	1	0.664732	0.455499	0.805803	0.699519	rl	0.693767	18C	3.26144	2.19539	2.19539
CG12559-RE	1	1	24	1	CG12559-RE	1	0.306613	0.653878	0.685689	0.947466	0.324087	0.781922	1	0.664732	0.455499	0.805803	0.699519	rl	0.693767	18C	3.26144	2.19539	2.19539
CG12559-RF	1	1	24	1	CG12559-RF	1	0.306613	0.653878	0.685689	0.947466	0.324087	0.781922	1	0.664732	0.455499	0.805803	0.699519	rl	0.693767	18C	3.26144	2.19539	2.19539
CG12560-RA	1	1	24	13	CG12560-RA	0.151915	0.931585	0.953607	1	0.575738	0.886208	1	0.658827	0.200724	0.576374	0.18991	0.492867	CG12560	0.634813	18C	6.58262	5.26565	5.26565
CG12567-RA	0.421631	1	24	13	CG12567-RA	0.679466	1	0.853033	0.559083	0.515017	0	0.176712	0.116422	0.359137	1	0.226525	0.167969	CG12567	0.471114	18C	Inf	8.58941	8.58941
CG12567-RB	0.421631	1	24	13	CG12567-RB	0.679466	1	0.853033	0.559083	0.515017	0	0.176712	0.116422	0.359137	1	0.226525	0.167969	CG12567	0.471114	18C	Inf	8.58941	8.58941
CG1257-RA	0.772187	1	24	7	CG1257-RA	0.794774	0.888745	0.953774	0.961708	0.354363	1	1	0.97177	0.587118	0.719157	0.341838	0.903003	alpha-Est3	0.789687	18C	2.82197	2.92536	2.82197
CG12576-RA	0.772187	1	24	11	CG12576-RA	0.865917	0.912953	0.965527	1	0.806033	0.945288	0.736399	0.699686	1	0.699264	0.607917	0.692032	CG12576	0.827585	18C	1.35796	1.64496	1.35796
CG12576-RB	0.772187	1	24	11	CG12576-RB	0.865917	0.912953	0.965527	1	0.806033	0.945288	0.736399	0.699686	1	0.699264	0.607917	0.692032	CG12576	0.827585	18C	1.35796	1.64496	1.35796
CG12581-RA	1	1	24	9	CG12581-RA	0.806146	0.997223	0.839758	0.834866	0.579431	1	0.843507	0.729389	1	0.640176	0.703962	0.818481	CG12581	0.816078	18C	1.72583	1.56207	1.56207
CG12581-RB	0.772187	1	24	9	CG12581-RB	0.806146	0.997223	0.839758	0.834866	0.579431	1	0.569193	1	0.571254	0.357892	0.48643	0.801533	CG12581	0.736977	18C	1.75687	2.79414	1.75687
CG12582-RA	1	1	24	21	CG12582-RA	0.810215	0.919835	0.970789	1	0.684662	0.532257	0.623158	0.590724	0.425192	0.706128	0.7471	1	CG12582	0.750838	18C	1.87879	2.35188	1.87879
CG12582-RB	1	1	24	21	CG12582-RB	0.810215	0.919835	0.970789	1	0.684662	0.532257	0.623158	0.590724	0.425192	0.706128	0.7471	1	CG12582	0.750838	18C	1.87879	2.35188	1.87879
CG12592-RA	0.141715	1	24	5	CG12592-RA	0.91032	0.781525	1	0.599229	0.689998	0.708055	0.875682	1	0.290021	0.302832	0.399122	0.628895	CG12592	0.68214	18C	1.66881	3.44802	1.66881
CG12594-RA	1	1	24	13	CG12594-RA	0.945251	0.828075	0.84765	1	0.767651	0	0.563596	0.222787	0.610888	0.850495	0.240823	1	CG12594	0.656435	18C	Inf	4.48858	4.48858
CG12605-RA	1	1	24	21	CG12605-RA	0.654519	0.387034	0.40352	0.365449	0.66443	1	0.630793	0.645481	0.988004	1	0.539073	0.773935	CG12605	0.67102	18C	2.73636	1.85504	1.85504
CG12605-RB	1	1	24	1	CG12605-RB	0.654519	0.387034	0.40352	0.365449	0.66443	1	1	0.467555	0.291374	0.608488	0.330811	0.0817659	CG12605	0.521246	18C	2.73636	12.23	2.73636
CG12605-RC	1	1	24	21	CG12605-RC	0.654519	0.387034	0.40352	0.365449	0.66443	1	0.630793	0.645481	0.988004	1	0.539073	0.773935	CG12605	0.67102	18C	2.73636	1.85504	1.85504
CG12608-RA	1	1	24	3	CG12608-RA	0.91032	0.893172	1	0.848907	0.919997	0.944073	0.62541	1	0.450656	0.589859	0.552488	0.534355	CG12608	0.772436	18C	1.59895	2.21899	1.59895
CG1263-RA	1	1	24	21	CG1263-RA	0.861155	0.865615	0.953186	1	0.816423	0.973336	0.860159	0.994964	0.802108	0.971561	0.884764	1	RpL8	0.915273	18C	1.22486	1.24672	1.22486
CG1263-RB	1	1	24	21	CG1263-RB	0.861155	0.865615	0.953186	1	0.816423	0.973336	0.860159	0.994964	0.802108	0.971561	0.884764	1	RpL8	0.915273	18C	1.22486	1.24672	1.22486
CG1264-RA	1	1	24	3	CG1264-RA	0.61152	1	0.159944	0.33545	0	0.396371	0.493146	0.259919	0.267263	0.558137	0.505729	1	lab	0.465623	18C	Inf	3.84736	3.84736
CG12643-RA	0.421631	1	24	13	CG12643-RA	0.379788	0.861716	0.685405	1	0.719673	0.812357	0.281808	0.716128	1	0.455638	0.292439	0.153067	CG12643	0.613168	18C	3.54852	6.5331	3.54852
CG1265-RB	1	1	24	21	CG1265-RB	0.755699	1	0.711554	0.975259	0.633094	0.897152	0.779233	0.949268	0.951745	0.795028	0.988423	1	CG1265	0.869705	18C	1.57954	1.25782	1.25782
CG12655-RA	0.772187	1	24	17	CG12655-RA	0.552419	0.948523	0.606841	1	0.837437	0.429677	0.828102	0.450693	0.666687	0.848946	1	0.91262	CG12655	0.756829	18C	2.32733	2.2188	2.2188
CG12664-RB	0.0363147	1	24	3	CG12664-RB	1	0.681363	0.523102	0.609501	0.842192	0.936251	0.941751	0.939061	0.931111	0.73218	0.859195	1	fend	0.832976	18C	1.91167	1.36578	1.36578
CG12665-RA	1	1	24	13	CG12665-RA	0.61152	1	0.58646	0.614992	0.515017	0	0.324896	0.489259	0.167695	0.656632	0.47598	1	Obp8a	0.536871	18C	Inf	5.96322	5.96322
CG12672-RA	1	1	24	3	CG12672-RA	0.205706	0.189217	0.322816	0.169261	0.584698	1	1	0.930109	0.956392	0.388359	0.402163	0.820064	CG12672	0.580732	18C	5.90805	2.57494	2.57494
CG12676-RA	0.772187	1	24	11	CG12676-RA	0.529016	0.575085	1	0.47486	0.592357	0.5611	0.881331	1	0.928748	0.985166	0.850817	0.610199	ed	0.749057	18C	2.10588	1.63881	1.63881
CG1268-RB	1	1	24	13	CG1268-RB	0.904081	0.845243	0.941977	1	0.898713	0.979872	1	0.979338	0.960221	0.981393	0.916188	0.930548	VhaM9.7-a	0.944798	18C	1.18309	1.09148	1.09148
CG1268-RC	1	1	24	13	CG1268-RC	0.904081	0.845243	0.941977	1	0.898713	0.979872	1	0.979338	0.960221	0.981393	0.916188	0.930548	VhaM9.7-a	0.944798	18C	1.18309	1.09148	1.09148
CG12690-RA	1	1	24	9	CG12690-RA	0.966352	1	0.91622	0.778575	0.762988	0.665512	1	0.811888	0.638668	0.75262	0.932286	0.691294	CHES-1-like	0.826367	18C	1.5026	1.56576	1.5026
CG12690-RB	1	1	24	9	CG12690-RB	0.966352	1	0.91622	0.778575	0.762988	0.665512	1	0.811888	0.638668	0.771674	0.932286	0.691294	CHES-1-like	0.827955	18C	1.5026	1.56576	1.5026
CG12703-RA	1	1	24	13	CG12703-RA	0.730798	0.88799	0.849516	0.935387	0.615472	1	0.674681	0.783523	0.950269	0.900569	0.596125	1	Pmp70	0.827028	18C	1.62477	1.6775	1.62477
CG1271-RA	0.772187	1	24	9	CG1271-RA	0.990263	0.910883	0.812332	1	0.852945	0.612687	0.624004	1	0.472237	0.60444	0.259429	0.299239	CG1271	0.703205	18C	1.63216	3.85461	1.63216
CG1271-RB	0.772187	1	24	9	CG1271-RB	0.990263	0.910883	0.812332	1	0.852945	0.612687	0.624004	1	0.472237	0.60444	0.259429	0.299239	CG1271	0.703205	18C	1.63216	3.85461	1.63216
CG1271-RC	0.772187	1	24	9	CG1271-RC	0.990263	0.910883	0.812332	1	0.852945	0.612687	0.624004	1	0.472237	0.60444	0.259429	0.299239	CG1271	0.703205	18C	1.63216	3.85461	1.63216
CG1271-RD	0.772187	1	24	9	CG1271-RD	0.990263	0.910883	0.812332	1	0.852945	0.612687	0.624004	1	0.472237	0.60444	0.259429	0.299239	CG1271	0.703205	18C	1.63216	3.85461	1.63216
CG12717-RA	0.880418	1	24	7	CG12717-RA	1	0.735872	0.470792	0.658262	0.378986	0	1	0.423532	0.0645185	0.370526	0.24417	0.452633	CG12717	0.483274	18C	Inf	15.4994	15.4994
CG12728-RA	0.209359	1	24	19	CG12728-RA	0.428775	0.424743	0.54348	0.434225	1	0.384814	0.489185	0.339251	1	0.631359	0.638084	0.881023	CG12728	0.599578	18C	2.59866	2.94767	2.59866
CG12730-RA	1	1	24	3	CG12730-RA	0.889483	1	0.775484	0.813212	0.842755	0.67263	1	0.707034	0.198276	0.736122	0.708689	0.772788	CG12730	0.759706	18C	1.4867	5.04347	1.4867
CG12734-RA	1	1	24	1	CG12734-RA	0.514265	0.286692	0.586938	0.730898	0.531544	1	1	0.800005	0.532277	0.555789	0.747771	0.543159	Girdin	0.652445	18C	3.48807	1.87872	1.87872
CG12734-RB	1	1	24	1	CG12734-RB	0.514265	0.286692	0.586938	0.730898	0.531544	1	1	0.800005	0.532277	0.555789	0.747771	0.543159	Girdin	0.652445	18C	3.48807	1.87872	1.87872
CG12736-RA	0.772187	1	24	5	CG12736-RA	0.771398	0.591302	0.823853	0.74933	0.751175	1	0.87479	1	0.826792	0.797744	0.821856	0.859047	CG12736	0.822274	18C	1.69118	1.25353	1.25353
CG12737-RA	0.421631	1	24	15	CG12737-RA	0.364597	0.484424	0.762885	1	0.690886	0.590805	0.531247	1	0.731205	0.668065	0.929622	0.705349	Crag	0.704924	18C	2.74276	1.49686	1.49686
CG12737-RB	0.421631	1	24	15	CG12737-RB	0.364597	0.484424	0.762885	1	0.690886	0.590805	0.531247	1	0.731205	0.668065	0.929622	0.705349	Crag	0.704924	18C	2.74276	1.49686	1.49686
CG1274-RA	0.772187	1	24	13	CG1274-RA	0.490029	0.924611	0.798583	0.434225	1	0.366489	0.459876	0.85844	0.946159	1	0.818766	0.696163	Jafrac2	0.732778	18C	2.72859	1.43645	1.43645
CG1274-RB	0.772187	1	24	13	CG1274-RB	0.490029	0.924611	0.798583	0.434225	1	0.366489	0.459876	0.85844	0.946159	1	0.818766	0.696163	Jafrac2	0.732778	18C	2.72859	1.43645	1.43645
CG12740-RA	1	1	24	21	CG12740-RA	0.755358	0.693317	0.861961	0.860701	0.694491	1	0.852389	1	0.822584	0.914801	0.956966	0.981179	RpL28	0.866146	18C	1.44234	1.21568	1.21568
CG12740-RB	1	1	24	21	CG12740-RB	0.755358	0.693317	0.861961	0.860701	0.694491	1	0.852389	1	0.822584	0.914801	0.956966	0.981179	RpL28	0.866146	18C	1.44234	1.21568	1.21568
CG12740-RC	1	1	24	21	CG12740-RC	0.755358	0.693317	0.861961	0.860701	0.694491	1	0.852389	1	0.822584	0.914801	0.956966	0.981179	RpL28	0.866146	18C	1.44234	1.21568	1.21568
CG12740-RD	1	1	24	21	CG12740-RD	0.755358	0.693317	0.861961	0.860701	0.694491	1	0.852389	1	0.822584	0.914801	0.956966	0.981179	RpL28	0.866146	18C	1.44234	1.21568	1.21568
CG12746-RB	1	1	24	21	CG12746-RB	0.757943	0.969649	0.758784	1	0.767651	0.991028	0.852157	0.781835	0.695597	0.904926	0.685094	1	CG12746	0.847055	18C	1.31936	1.45965	1.31936
CG12746-RD	1	1	24	21	CG12746-RD	0.757943	0.969649	0.758784	1	0.767651	0.991028	0.852157	0.781835	0.695597	0.904926	0.685094	1	CG12746	0.847055	18C	1.31936	1.45965	1.31936
CG12746-RE	1	1	24	21	CG12746-RE	0.757943	0.969649	0.758784	1	0.767651	0.991028	0.852157	0.781835	0.695597	0.904926	0.685094	1	CG12746	0.847055	18C	1.31936	1.45965	1.31936
CG12749-RA	0.421631	1	24	9	CG12749-RA	0.579916	0.785048	0.712599	0.603216	0.580552	1	0.459485	1	0.648198	0.525882	0.441206	0.569252	Hrb87F	0.658779	18C	2.17635	2.26651	2.17635
CG12749-RB	0.421631	1	24	9	CG12749-RB	0.579916	0.785048	0.712599	0.603216	0.580552	1	0.459485	1	0.648198	0.525882	0.441206	0.569252	Hrb87F	0.658779	18C	2.17635	2.26651	2.17635
CG12750-RA	1	1	24	9	CG12750-RA	0.72562	0.991068	0.67288	0.59706	1	0.384814	0.892852	1	0.463724	0.968414	0.438741	0.48092	ncm	0.718008	18C	2.59866	2.27925	2.27925
CG12752-RA	1	1	24	21	CG12752-RA	0.832179	0.933502	0.748529	0.818347	1	0.82883	0.600662	0.419011	1	0.921981	0.704561	0.925456	Nxt1	0.811088	18C	1.66483	2.38657	1.66483
CG12753-RA	1	1	24	21	CG12753-RA	0.675486	0.673117	0.679091	0.712129	1	0.533608	0.523339	0.657753	0.603615	0.622684	0.591737	1	ema	0.68938	18C	1.91081	1.68994	1.68994
CG12753-RB	1	1	24	21	CG12753-RB	0.675486	0.673117	0.679091	0.712129	1	0.533608	0.539866	0.678525	0.607672	0.642347	0.610424	1	ema	0.696022	18C	1.87403	1.64562	1.64562
CG12755-RB	0.0363147	1	24	11	CG12755-RB	0.45864	1	0.919676	0.545106	0.289697	0	0.253609	0.1221	1	0.0459987	0.0625193	0.0370866	l(3)mbn	0.394536	18C	Inf	26.9639	26.9639
CG12755-RC	0.0363147	1	24	11	CG12755-RC	0.45864	1	0.919676	0.545106	0.289697	0	0.253609	0.1221	1	0.0459987	0.0625193	0.0370866	l(3)mbn	0.394536	18C	Inf	26.9639	26.9639
CG12756-RA	1	1	24	3	CG12756-RA	0.771398	0.788403	0.739787	0.634727	0.812081	1	0.399434	1	0.45099	0.621602	0.238948	0.734035	Eaf6	0.682617	18C	2.50354	4.18501	2.50354
CG12758-RA	0.300911	1	24	7	CG12758-RA	0.921711	1	0.97357	0.758409	0.470233	0.827209	0.670679	0.710444	0.902756	0.669765	0.573159	1	sano	0.789828	18C	2.12661	1.74472	1.74472
CG12758-RB	0.300911	1	24	7	CG12758-RB	0.921711	1	0.97357	0.758409	0.470233	0.827209	0.670679	0.710444	0.902756	0.669765	0.573159	1	sano	0.789828	18C	2.12661	1.74472	1.74472
CG12758-RC	0.300911	1	24	7	CG12758-RC	0.921711	1	0.97357	0.758409	0.470233	0.827209	0.670679	0.710444	0.902756	0.669765	0.573159	1	sano	0.789828	18C	2.12661	1.74472	1.74472
CG12758-RD	0.300911	1	24	7	CG12758-RD	0.921711	1	0.97357	0.758409	0.470233	0.827209	0.670679	0.710444	0.902756	0.669765	0.573159	1	sano	0.789828	18C	2.12661	1.74472	1.74472
CG12758-RE	0.300911	1	24	7	CG12758-RE	0.921711	1	0.97357	0.758409	0.470233	0.827209	0.670679	0.710444	0.902756	0.669765	0.573159	1	sano	0.789828	18C	2.12661	1.74472	1.74472
CG12759-RA	1	1	24	15	CG12759-RA	0.395793	0.728131	0.41408	0.86845	1	0.256542	0.249991	0.235287	1	0.168415	0.335722	0.452616	Dbp45A	0.508752	18C	4.00015	5.93772	4.00015
CG1276-RA	0.300911	1	24	15	CG1276-RA	1	0.594063	0.809174	0.719974	0.710599	0.48613	0.372319	0.677478	0.800714	0.869526	1	0.584215	TfIIEbeta	0.718683	18C	2.68587	1.7117	1.7117
CG1276-RB	0.300911	1	24	15	CG1276-RB	1	0.594063	0.809174	0.719974	0.710599	0.48613	0.372319	0.677478	0.800714	0.869526	1	0.584215	TfIIEbeta	0.718683	18C	2.68587	1.7117	1.7117
CG12765-RA	1	1	24	3	CG12765-RA	0.81536	1	0.731171	0.575057	0.551804	0.905991	0.690405	0.83174	0.80179	0.799997	0.859739	1	fsd	0.796921	18C	1.81224	1.25001	1.25001
CG12767-RA	1	1	24	3	CG12767-RA	1	0.817635	0.871837	0.792352	0.631644	0.144039	0.927115	0.727772	0.516709	0.85581	0.421441	1	Dip3	0.72553	18C	6.94258	2.37281	2.37281
CG12770-RA	0.209359	1	24	11	CG12770-RA	0.907273	1	0.963152	0.980734	0.910175	0.507355	1	0.92445	0.943404	0.850338	0.879013	0.800657	Vps28	0.888879	18C	1.97101	1.24897	1.24897
CG12772-RA	0.772187	1	24	17	CG12772-RA	0.514265	0.270309	0.461166	0.846303	0.835284	1	0.257903	0.26431	0.155302	1	0.465295	0.181589	CG12772	0.520977	18C	3.87742	6.43906	3.87742
CG12773-RA	1	1	24	21	CG12773-RA	0.56715	0.695583	0.699312	1	0.921181	0.472644	0.340101	0.43021	0.294911	0.115477	0.569672	1	CG12773	0.592187	18C	2.9403	8.65976	2.9403
CG12775-RA	1	1	24	21	CG12775-RA	0.855009	0.859607	0.852447	1	0.888077	0.912135	0.80178	1	0.772161	0.915189	0.927304	0.982231	RpL21	0.897162	18C	1.24722	1.29507	1.24722
CG12781-RA	0.0214013	1	24	13	CG12781-RA	0.655105	0.725342	0.856717	0.748664	1	0.566163	0.651237	0.829502	1	0.900854	0.810081	0.504386	nahoda	0.770671	18C	1.76628	1.98261	1.76628
CG12781-RB	0.0214013	1	24	13	CG12781-RB	0.655105	0.725342	0.856717	0.748664	1	0.566163	0.651237	0.829502	1	0.900854	0.810081	0.504386	nahoda	0.770671	18C	1.76628	1.98261	1.76628
CG12787-RA	1	1	24	13	CG12787-RA	0.529016	0.987966	1	0.929935	0.546791	0.84165	0.621155	0.774226	0.864341	0.77585	0.631264	1	hoe1	0.79185	18C	1.8903	1.58412	1.58412
CG12787-RB	1	1	24	13	CG12787-RB	0.529016	0.987966	1	0.929935	0.546791	0.84165	0.621155	0.774226	0.864341	0.77585	0.631264	1	hoe1	0.79185	18C	1.8903	1.58412	1.58412
CG12787-RC	1	1	24	13	CG12787-RC	0.529016	0.987966	1	0.929935	0.546791	0.84165	0.621155	0.774226	0.864341	0.77585	0.631264	1	hoe1	0.79185	18C	1.8903	1.58412	1.58412
CG12787-RD	1	1	24	13	CG12787-RD	0.529016	0.987966	1	0.929935	0.546791	0.84165	0.621155	0.774226	0.864341	0.77585	0.631264	1	hoe1	0.79185	18C	1.8903	1.58412	1.58412
CG12787-RE	1	1	24	13	CG12787-RE	0.529016	0.987966	1	0.929935	0.546791	0.84165	0.621155	0.774226	0.864341	0.77585	0.631264	1	hoe1	0.79185	18C	1.8903	1.58412	1.58412
CG12787-RF	1	1	24	13	CG12787-RF	0.529016	0.987966	1	0.929935	0.546791	0.84165	0.621155	0.774226	0.864341	0.77585	0.631264	1	hoe1	0.79185	18C	1.8903	1.58412	1.58412
CG12789-RA	0.000663781	0.3972	24	9	CG12789-RA	0.774711	1	0.83302	0.806654	0.598084	0.716025	0.870775	0.84796	1	0.744122	0.534429	0.65202	santa-maria	0.781483	18C	1.67201	1.87116	1.67201
CG12792-RA	0.300911	1	24	17	CG12792-RA	0.413001	0.717579	0.882171	0.58526	1	0.803089	0.447872	0.505835	0.264192	1	0.507729	0.567621	l(2)09851	0.641196	18C	2.4213	3.78512	2.4213
CG12794-RA	1	1	24	15	CG12794-RA	0.678829	0.597557	0.644329	1	0.560178	0.510967	0.81738	0.668889	0.839337	0.584274	1	0.915975	lcs	0.73481	18C	1.95707	1.71152	1.71152
CG12795-RB	0.141715	1	24	11	CG12795-RB	1	0.972188	0.535861	0.742551	0.693268	0.379419	0.411945	0.55411	1	0.518038	0.396052	0.304551	CG12795	0.625665	18C	2.63561	3.28352	2.63561
CG12797-RA	0.353312	1	24	7	CG12797-RA	0.87917	1	0.845615	0.735073	0.859854	0.799636	0.806357	1	0.805468	0.773942	0.826931	0.823575	Ciao1	0.846302	18C	1.36041	1.29209	1.29209
CG12800-RA	0.489949	1	24	11	CG12800-RA	0.849632	0.303926	1	0.640842	0.536665	0.137677	0.51097	0.89771	1	0.401604	0.400284	0.64759	Cyp6d4	0.610575	18C	7.26336	2.49823	2.49823
CG12811-RA	1	1	24	9	CG12811-RA	1	0.86714	0.888865	0.687832	0.680991	0.622855	0.806122	0.873822	0.695855	1	0.977368	0.885771	CG12811	0.832218	18C	1.60551	1.43708	1.43708
CG12814-RA	1	1	24	9	CG12814-RA	0.395326	1	0.348968	0.569248	0.842755	0.67263	1	0.610025	0.652354	0.768498	0.601382	0.258168	CG12814	0.64328	18C	2.86559	3.87344	2.86559
CG12814-RB	1	1	24	9	CG12814-RB	0.395326	1	0.348968	0.569248	0.842755	0.67263	1	0.610025	0.652354	0.768498	0.601382	0.258168	CG12814	0.64328	18C	2.86559	3.87344	2.86559
CG12817-RB	1	1	24	3	CG12817-RB	0.146933	0.360413	0.345874	0.0604502	0.139214	1	1	0.536822	0.836351	0.698635	0.664685	0.938794	CG12817	0.560681	18C	16.5425	1.86281	1.86281
CG12818-RA	1	1	24	3	CG12818-RA	0.925678	0.630722	0.40352	0.930933	0.194899	1	1	0	0.590592	0.76178	0.36156	0.0974902	CG12818	0.574765	18C	5.13085	Inf	5.13085
CG12819-RA	1	1	24	3	CG12819-RA	0	0.809035	0.20704	0.217113	1	0.513085	0.93406	1	0.342752	0.357892	0.399122	0.702883	sle	0.540249	18C	Inf	2.91756	2.91756
CG12819-RB	1	1	24	3	CG12819-RB	0	0.809035	0.20704	0.217113	1	0.513085	0.93406	1	0.342752	0.357892	0.399122	0.702883	sle	0.540249	18C	Inf	2.91756	2.91756
CG12821-RB	0.772187	1	24	3	CG12821-RB	1	0.438019	0.560467	0.117547	0.541409	0.277789	0.425507	0.841007	0.288257	0.20066	1	0.943732	Atg10	0.552866	18C	8.50726	4.98356	4.98356
CG12822-RA	1	1	24	21	CG12822-RA	0.81622	0.763963	1	0.860129	0.624099	0.779656	0.802366	0.689095	0.621209	1	0.912224	0.862546	CG12822	0.810959	18C	1.60231	1.60976	1.60231
CG12822-RB	1	1	24	21	CG12822-RB	0.81622	0.763963	1	0.860129	0.624099	0.779656	0.802366	0.689095	0.621209	1	0.912224	0.862546	CG12822	0.810959	18C	1.60231	1.60976	1.60231
CG12833-RB	0.027207	1	24	15	CG12833-RB	0.434044	0.425867	0.885492	1	0.822483	0.675206	0.326237	0.268667	0.663021	1	0.522751	0.155049	esn	0.598235	18C	3.06526	6.44959	3.06526
CG12836-RA	0.772187	1	24	19	CG12836-RA	0	0.107871	0.0690133	0.144742	1	0.342057	0.706846	0.46569	0.957697	1	0.906101	0.447919	CG12836	0.512328	18C	Inf	2.23255	2.23255
CG12838-RA	1	1	24	1	CG12838-RA	0.849632	0.521017	1	0.174775	0.603748	0.619548	0.468058	0.822318	0.422777	0.809328	1	0.494336	Tsp42Eo	0.648795	18C	5.72164	2.36531	2.36531
CG12839-RA	1	1	24	17	CG12839-RA	0.580496	0.744312	0.745344	0.477648	1	0.513085	0.498395	0.199869	0.508898	0.408752	1	0.494336	Tsp42En	0.597595	18C	2.09359	5.00328	2.09359
CG12840-RA	0.0454225	1	24	1	CG12840-RA	0.863231	0.484304	0.40352	0.604502	0.80048	1	0.561428	0.859731	0.500262	0.772805	0.758593	1	Tsp42El	0.717405	18C	2.47819	1.99895	1.99895
CG12841-RA	0.248511	1	24	21	CG12841-RA	0.659654	0.202259	0.31056	0.108556	1	0.256542	0.153966	0.1623	0.417214	0.435643	1	0.702477	Tsp42Ek	0.450764	18C	9.21181	6.16145	6.16145
CG12843-RA	1	1	24	3	CG12843-RA	0.843285	0.882154	0.739532	1	0.704986	0.723435	0.954584	1	0.712282	0.782889	0.901922	0.976868	Tsp42Ei	0.851828	18C	1.41847	1.40394	1.40394
CG12844-RB	1	1	24	15	CG12844-RB	0.257482	1	0.740792	0.6709	0.894503	0.417233	0.829469	0.839233	0.588677	0.894079	1	0.675801	Tsp42Eh	0.734014	18C	3.88377	1.69872	1.69872
CG12844-RC	1	1	24	15	CG12844-RC	0.257482	1	0.740792	0.6709	0.894503	0.417233	0.829469	0.839233	0.588677	0.894079	1	0.675801	Tsp42Eh	0.734014	18C	3.88377	1.69872	1.69872
CG12845-RA	1	1	24	9	CG12845-RA	0.75794	1	0.810982	0.850436	0.565793	0.803908	1	0.46296	0.634722	0.414224	0.594752	0.445293	Tsp42Ef	0.695084	18C	1.76743	2.41415	1.76743
CG12846-RA	1	1	24	13	CG12846-RA	0.541168	1	0.685068	0.914324	0.533248	0.477048	1	0.730052	0.903259	0.930411	0.756433	0.804953	Tsp42Ed	0.772997	18C	2.09622	1.36977	1.36977
CG12848-RA	1	1	24	3	CG12848-RA	0.98745	0.898314	0.766291	1	0.98698	0.865108	0.586259	1	0.511408	0.556721	0.74809	0.651404	CG12848	0.796502	18C	1.70573	1.95538	1.70573
CG12851-RA	0.170207	1	24	9	CG12851-RA	0.634169	1	0.710861	0.447267	0.858361	0.176165	0.482952	1	0.519322	0.238595	0.334113	0.495493	CG12851	0.574775	18C	5.6765	4.19121	4.19121
CG12855-RA	1	1	24	21	CG12855-RA	0.514265	0.57507	0.545939	0.821411	0.745204	1	1	0.696119	0.903259	0.871975	0.644978	0.836944	HPS1	0.76293	18C	1.94452	1.55044	1.55044
CG12858-RA	0.576952	1	24	21	CG12858-RA	0.560319	0.456567	0.523974	0.473677	0.756326	1	0.840305	0.651921	0.978914	0.651808	1	0.74648	CG12858	0.720024	18C	2.19026	1.53419	1.53419
CG12859-RA	1	1	24	13	CG12859-RA	0.915401	1	0.922447	0.933203	0.832933	0.762	0.743522	0.854885	0.741768	0.798315	1	0.825717	CG12859	0.860849	18C	1.34495	1.34813	1.34495
CG12863-RA	1	1	24	9	CG12863-RA	0.741236	1	0.697936	0.731891	0.842755	0.57654	1	0.603925	0.790351	0.275087	0.712163	0.211229	CG12863	0.681926	18C	1.73449	4.73421	1.73449
CG12868-RA	0.0729854	1	24	13	CG12868-RA	0.737874	0.718651	0.681148	1	0.575738	0.422004	0.664646	0.750664	0.757582	1	0.459813	0.300841	CG12868	0.672413	18C	2.36965	3.32402	2.36965
CG12876-RA	1	1	24	23	CG12876-RA	0.986741	1	0.929099	0.948661	0.90538	0.80789	0.828165	0.711204	0.792707	0.718913	1	0.809388	ALiX	0.869846	18C	1.23779	1.40607	1.23779
[truncated: 10,837 more rows]

## Sheet: 25C
CycID	JTK_pvalue	JTK_BH.Q	JTK_period	JTK_adjphase	zt3	zt7	zt11	zt15	zt19	zt23	zt3	zt7	zt11	zt15	zt19	zt23	gene.name	mean.exp	temp	AMP_1	AMP_2	AMP_min
CG10002-RB	0.0931041	1	24	13	0.59556	0.602855	1	0.73684	0.379316	0.430657	0.196903	0.537575	0.498666	1	0.250324	0.200091	fkh	0.535732	25C	5.07865	4.99772	4.99772
CG10006-RB	1	1	24	9	1	0.155389	0.675496	0.22398	0.185764	0.878782	1	0.676039	0.771824	0.902871	0.678031	0.474224	Zip71B	0.6352	25C	6.43546	2.10871	2.10871
CG10007-RA	1	1	24	13	0.712059	0.892251	0.940823	0.786801	1	0.744886	0.763224	1	0.811128	0.753695	0.803524	0.857383	Tango9	0.838814	25C	1.40438	1.3268	1.3268
CG10009-RA	0.576952	1	24	13	0.430946	1	0.685708	0.495724	0.480326	0.350094	0.389067	0.402453	0.881289	0.801828	1	0.618836	Noa36	0.628023	25C	2.85638	2.48476	2.48476
CG10011-RA	1	1	24	1	0.579506	0.471529	0.469745	0.597856	0.557831	1	1	0.498362	0.643187	0.188098	0.459083	0.366959	CG10011	0.569346	25C	2.12881	5.31637	2.12881
CG10016-RA	1	1	24	21	0.207045	0.411808	0.391602	0.577097	1	0	0.436995	0.818102	0.316203	0.39455	1	0.79933	drm	0.529394	25C	Inf	3.16252	3.16252
CG10016-RB	1	1	24	21	0.207045	0.411808	0.391602	0.577097	1	0	0.436995	0.818102	0.316203	0.39455	1	0.79933	drm	0.529394	25C	Inf	3.16252	3.16252
CG10018-RA	0.209359	1	24	19	0.538316	0.490738	0.630294	0.321525	1	0.30276	0	0.345584	0.641142	1	0.844844	0.675309	Snm1	0.565876	25C	Inf	2.89365	2.89365
CG10021-RA	1	1	24	9	0.804432	1	0.652069	0.640627	0.697362	0.678643	0.44712	0.887788	1	0.275244	0.878479	0.495666	bowl	0.704786	25C	2.23654	3.63314	2.23654
CG10021-RB	1	1	24	9	0.804432	1	0.652069	0.640627	0.697362	0.678643	0.44712	0.887788	1	0.275244	0.878479	0.495666	bowl	0.704786	25C	2.23654	3.63314	2.23654
CG10021-RC	1	1	24	9	0.804432	1	0.652069	0.640627	0.697362	0.678643	0.44712	0.887788	1	0.275244	0.878479	0.495666	bowl	0.704786	25C	2.23654	3.63314	2.23654
CG10021-RD	1	1	24	9	0.804432	1	0.652069	0.640627	0.697362	0.678643	0.44712	0.887788	1	0.275244	0.878479	0.495666	bowl	0.704786	25C	2.23654	3.63314	2.23654
CG10023-RA	0.300911	1	24	1	0.663798	0.919482	0.653373	0.509751	0.951248	1	0.606799	0.823946	0.471595	0.507279	1	0.68514	Fak	0.732701	25C	1.96174	2.12047	1.96174
CG10023-RB	0.300911	1	24	1	0.663798	0.919482	0.653373	0.509751	0.951248	1	0.606799	0.823946	0.471595	0.507279	1	0.68514	Fak	0.732701	25C	1.96174	2.12047	1.96174
CG10023-RC	0.300911	1	24	1	0.663798	0.919482	0.653373	0.509751	0.951248	1	0.606799	0.823946	0.471595	0.507279	1	0.68514	Fak	0.732701	25C	1.96174	2.12047	1.96174
CG10023-RD	0.300911	1	24	1	0.663798	0.919482	0.653373	0.509751	0.951248	1	0.606799	0.823946	0.471595	0.507279	1	0.68514	Fak	0.732701	25C	1.96174	2.12047	1.96174
CG10023-RE	0.300911	1	24	1	0.663798	0.919482	0.653373	0.509751	0.951248	1	0.606799	0.823946	0.471595	0.507279	1	0.68514	Fak	0.732701	25C	1.96174	2.12047	1.96174
CG10026-RA	1	1	24	21	0.299065	0.57359	0.207789	0.740018	1	0.468557	0.557636	0.89555	0.92567	0.666362	0.708927	1	CG10026	0.670264	25C	4.81257	1.50069	1.50069
CG10026-RB	1	1	24	21	0.299065	0.57359	0.207789	0.740018	1	0.468557	0.557636	0.89555	0.92567	0.666362	0.708927	1	CG10026	0.670264	25C	4.81257	1.50069	1.50069
CG10026-RC	1	1	24	21	0.299065	0.57359	0.207789	0.740018	1	0.468557	0.557636	0.89555	0.92567	0.666362	0.708927	1	CG10026	0.670264	25C	4.81257	1.50069	1.50069
CG10031-RA	1	1	24	21	0.519892	0.677306	0.724846	0.794933	0.718536	1	0.77201	0.736599	0.798364	0.800233	0.724513	1	CG10031	0.772269	25C	1.92348	1.38024	1.38024
CG10033-RA	0.113223	1	24	19	0.710279	0.76399	0.854533	0.924385	1	0.794745	0.823921	0.700933	0.920312	0.680098	1	0.959196	for	0.844366	25C	1.4079	1.47038	1.4079
CG10033-RC	0.113223	1	24	19	0.710279	0.76399	0.854533	0.924385	1	0.794745	0.823921	0.700933	0.920312	0.680098	1	0.959196	for	0.844366	25C	1.4079	1.47038	1.4079
CG10033-RD	0.113223	1	24	19	0.710279	0.76399	0.854533	0.924385	1	0.794745	0.823921	0.700933	0.920312	0.680098	1	0.959196	for	0.844366	25C	1.4079	1.47038	1.4079
CG10033-RE	0.113223	1	24	19	0.710279	0.76399	0.854533	0.924385	1	0.794745	0.823921	0.700933	0.920312	0.680098	1	0.959196	for	0.844366	25C	1.4079	1.47038	1.4079
CG10033-RF	0.113223	1	24	19	0.710279	0.76399	0.854533	0.924385	1	0.794745	0.823921	0.700933	0.920312	0.680098	1	0.959196	for	0.844366	25C	1.4079	1.47038	1.4079
CG10033-RG	0.113223	1	24	19	0.710279	0.76399	0.854533	0.924385	1	0.794745	0.823921	0.700933	0.920312	0.680098	1	0.959196	for	0.844366	25C	1.4079	1.47038	1.4079
CG10033-RH	0.113223	1	24	19	0.710279	0.76399	0.854533	0.924385	1	0.794745	0.823921	0.700933	0.920312	0.680098	1	0.959196	for	0.844366	25C	1.4079	1.47038	1.4079
CG10033-RI	0.113223	1	24	19	0.710279	0.76399	0.854533	0.924385	1	0.794745	0.823921	0.700933	0.920312	0.680098	1	0.959196	for	0.844366	25C	1.4079	1.47038	1.4079
CG10033-RJ	0.113223	1	24	19	0.710279	0.76399	0.854533	0.924385	1	0.794745	0.823921	0.700933	0.920312	0.680098	1	0.959196	for	0.844366	25C	1.4079	1.47038	1.4079
CG10038-RA	1	1	24	1	0.31523	0.633016	0.432426	0.521392	1	0.511419	0.769187	1	0.834858	0.57873	0.86146	0.856085	CG10038	0.692817	25C	3.17228	1.72792	1.72792
CG10038-RB	1	1	24	1	0.31523	0.633016	0.432426	0.521392	1	0.511419	0.769187	1	0.834858	0.57873	0.86146	0.856085	CG10038	0.692817	25C	3.17228	1.72792	1.72792
CG1004-RA	1	1	24	21	1	0.430946	0.594437	0.902555	0.34676	0.862378	0.565247	0.399209	0.552708	1	0.57294	0.504541	rho	0.64431	25C	2.88384	2.50495	2.50495
CG10042-RA	0.421631	1	24	23	0.858186	0.872854	0.442681	0.885359	1	0.888535	1	0.604933	0.546381	0.414584	0.959967	0.746592	MBD-R2	0.768339	25C	2.25896	2.41206	2.25896
CG10042-RB	0.421631	1	24	23	0.858186	0.872854	0.442681	0.885359	1	0.888535	1	0.604933	0.546381	0.414584	0.959967	0.746592	MBD-R2	0.768339	25C	2.25896	2.41206	2.25896
CG10043-RA	0.772187	1	24	23	0.725512	0.49951	0.180953	1	0.808646	0.847473	0.420735	0.570769	0.37062	0.371611	1	0.316014	RtGEF	0.592654	25C	5.5263	3.16442	3.16442
CG10043-RB	0.772187	1	24	23	0.725512	0.49951	0.180953	1	0.808646	0.847473	0.420735	0.570769	0.37062	0.371611	1	0.316014	RtGEF	0.592654	25C	5.5263	3.16442	3.16442
CG10043-RD	0.772187	1	24	23	0.725512	0.49951	0.180953	1	0.808646	0.847473	0.420735	0.570769	0.37062	0.371611	1	0.316014	RtGEF	0.592654	25C	5.5263	3.16442	3.16442
CG10045-RA	0.027207	1	24	9	0.922897	1	0.926404	0.916021	0.83552	0.899881	0.911735	1	0.791353	0.867011	0.750123	0.795847	GstD1	0.884733	25C	1.19686	1.33311	1.19686
CG10045-RB	0.113223	1	24	7	0.851752	1	0.664855	0.725416	0.527417	0.678643	0.911735	1	0.791353	0.867011	0.750123	0.795847	GstD1	0.797013	25C	1.89603	1.33311	1.33311
CG10047-RA	0.421631	1	24	7	0.915583	0.713391	0.881324	0.63963	0.783595	1	0.981441	1	0.886845	0.847956	0.710421	0.658527	Syt4	0.834893	25C	1.5634	1.51854	1.51854
CG10053-RA	1	1	24	1	0.820629	0.68009	0.886931	0.816908	0.304887	1	0.407862	0.499951	0.527005	0.39455	1	0.888144	CG10053	0.68558	25C	3.2799	2.53453	2.53453
CG10055-RA	0.141715	1	24	3	0.726223	1	0.407543	0.50049	0.684909	0.518408	0.756972	0.826661	0.547734	0	0.481172	1	CG10055	0.620843	25C	2.45373	Inf	2.45373
CG10059-RA	1	1	24	15	0.217705	0.866021	1	0.73684	0.647069	0.673429	0.973875	0.467487	0.677578	0.676372	1	0.532886	MAGE	0.705772	25C	4.59338	2.1391	2.1391
CG10060-RA	1	1	24	9	0.785939	1	0.861931	0.745558	0.257646	0.351022	0.908649	0.645313	0.578979	0.673457	1	0.509917	Galphai	0.693201	25C	3.88129	1.9611	1.9611
CG10062-RA	1	1	24	13	0.489379	0.973365	0.429746	0.682023	1	0.550473	0.544427	0.762242	1	0.787736	0.390435	0.567429	CG10062	0.681438	25C	2.32696	2.56125	2.32696
CG10067-RA	1	1	24	15	1	0.615355	0.708592	0.871236	0.892997	0.814735	0.853507	0.845064	1	0.859167	0.893368	0.7498	Act57B	0.841985	25C	1.62508	1.33369	1.33369
CG10068-RA	1	1	24	1	0.570942	0.182506	0.793376	0.292296	1	0.206427	0.600294	0.59743	0.46432	0.233615	1	0.988645	CG10068	0.577487	25C	5.47928	4.28054	4.28054
CG10069-RA	1	1	24	9	0.942128	1	0.293725	0.519428	0.969307	0.519682	0.888433	0.91119	1	0.705587	0.606569	0.367816	MFS16	0.726989	25C	3.40455	2.71875	2.71875
CG10069-RB	1	1	24	9	0.942128	1	0.293725	0.519428	0.969307	0.519682	0.888433	0.91119	1	0.705587	0.606569	0.367816	MFS16	0.726989	25C	3.40455	2.71875	2.71875
CG10069-RC	1	1	24	9	0.942128	1	0.293725	0.519428	0.969307	0.519682	0.888433	0.91119	1	0.705587	0.606569	0.367816	MFS16	0.726989	25C	3.40455	2.71875	2.71875
CG1007-RA	1	1	24	21	0.918815	1	0.923385	0.921182	0.997974	0.937287	0.764097	0.665265	0.890766	0.801377	0.927248	1	emc	0.895616	25C	1.30873	1.50316	1.30873
CG10071-RA	0.772187	1	24	23	0.744287	1	0.888323	0.95629	0.953901	0.962812	0.910507	0.938869	0.830347	0.894348	0.918355	1	RpL29	0.916503	25C	1.34357	1.20432	1.20432
CG10071-RB	0.772187	1	24	23	0.744287	1	0.888323	0.95629	0.953901	0.962812	0.910507	0.938869	0.830347	0.894348	0.918355	1	RpL29	0.916503	25C	1.34357	1.20432	1.20432
CG10071-RC	0.772187	1	24	23	0.744287	1	0.888323	0.95629	0.953901	0.962812	0.910382	0.939162	0.830606	0.893934	0.91786	1	RpL29	0.916463	25C	1.34357	1.20394	1.20394
CG10072-RA	0.489949	1	24	13	0.745337	0.555923	1	0.644735	0.401048	0.607106	0.566397	0.689231	1	0.664798	0.77767	0.460455	sgl	0.676058	25C	2.49347	2.17176	2.17176
CG10075-RA	1	1	24	9	0.820629	0.625683	0.960842	0.533713	0.569123	1	0.840573	0.697793	0.837009	0.696265	1	0.579906	CG10075	0.763461	25C	1.87367	1.72442	1.72442
CG10076-RA	1	1	24	9	1	0.580119	0.825607	0.564097	0.577933	0.84363	0.832034	0.876604	0.578591	1	0.851712	0.52707	spir	0.754783	25C	1.77274	1.89728	1.77274
CG10076-RB	1	1	24	9	1	0.580119	0.825607	0.564097	0.577933	0.84363	0.832034	0.876604	0.578591	1	0.851712	0.52707	spir	0.754783	25C	1.77274	1.89728	1.77274
CG10076-RC	1	1	24	9	1	0.580119	0.825607	0.564097	0.577933	0.84363	0.832034	0.876604	0.578591	1	0.851712	0.52707	spir	0.754783	25C	1.77274	1.89728	1.77274
CG10076-RD	0.489949	1	24	3	1	0.716033	0.551205	0.955647	0.401251	0.84363	1	0.549577	0.888036	0.410396	0.577867	0.923813	spir	0.734788	25C	2.49221	2.43667	2.43667
CG10077-RA	0.300911	1	24	11	0.768234	0.84068	1	0.793778	0.731261	0.539299	0.899019	1	0.836379	0.901301	0.804504	0.896967	CG10077	0.834285	25C	1.85426	1.243	1.243
CG10077-RB	1	1	24	1	1	0.472989	0.494266	0.371479	0.394183	0.56585	0.449481	0.189917	0.298134	0.634099	1	0.133222	CG10077	0.500302	25C	2.69195	7.50629	2.69195
CG10078-RA	0.0363147	1	24	5	0.915365	1	0.835774	0.689	0.671319	0.809549	1	0.825754	0.523562	0.451435	0.489089	0.565703	Prat2	0.731379	25C	1.48961	2.21516	1.48961
CG10078-RB	0.0363147	1	24	5	0.915365	1	0.835774	0.689	0.671319	0.809549	1	0.825754	0.523562	0.451435	0.489089	0.565703	Prat2	0.731379	25C	1.48961	2.21516	1.48961
CG10079-RA	1	1	24	21	0.943204	0.978044	0.615375	0.728241	1	0.737492	0.443031	0.500501	0.309517	1	0.369012	0.388108	Egfr	0.667711	25C	2.25718	3.23084	2.25718
CG10079-RB	1	1	24	21	0.943204	0.978044	0.615375	0.728241	1	0.737492	0.443031	0.500501	0.309517	1	0.369012	0.388108	Egfr	0.667711	25C	2.25718	3.23084	2.25718
CG10080-RA	1	1	24	9	0.94897	0.849367	1	0.17004	0.846167	0.560406	0.413496	0.276467	0.747998	1	0.450583	0.210096	mahj	0.622799	25C	5.88097	4.75973	4.75973
CG10082-RA	1	1	24	21	1	0.745868	0.543952	0.636574	0.73328	0.810329	0.464128	0.718596	0.915916	1	0.724152	0.714612	CG10082	0.750617	25C	2.15458	1.39936	1.39936
CG10082-RB	1	1	24	21	1	0.745868	0.543952	0.636574	0.73328	0.810329	0.464128	0.718596	0.915916	1	0.724152	0.714612	CG10082	0.750617	25C	2.15458	1.39936	1.39936
CG10083-RA	0.880418	1	24	19	0.933082	0.669188	0.989076	0.878836	1	0.7569	0.449481	0.674934	0.69113	0.507279	1	0.593788	Abp1	0.761974	25C	2.22479	1.9713	1.9713
CG10084-RA	1	1	24	21	0.700376	1	0.794811	0.788832	0.780629	0.962255	0.604133	0.628335	0.721284	1	0.844844	0.552525	swm	0.781502	25C	1.65526	1.80987	1.65526
CG10084-RB	1	1	24	21	0.700376	1	0.794811	0.788832	0.780629	0.962255	0.590708	0.614372	0.705256	1	0.826069	0.540247	swm	0.775296	25C	1.69288	1.85101	1.69288
CG10089-RD	1	1	24	21	0.692797	0.172245	0.467982	1	0.193045	0.389643	1	0.795646	0.477566	0.722297	0.966194	0.670688	CG10089	0.629009	25C	5.80569	2.09395	2.09395
CG1009-RA	0.576952	1	24	15	1	0.504895	0.997656	0.817813	0.891669	0.493199	0.350733	0.698368	0.644481	1	0.410688	0.459585	Psa	0.689091	25C	2.85117	2.43494	2.43494
CG1009-RB	0.576952	1	24	15	1	0.504895	0.997656	0.817813	0.891669	0.493199	0.350733	0.698368	0.644481	1	0.410688	0.459585	Psa	0.689091	25C	2.85117	2.43494	2.43494
CG1009-RC	0.576952	1	24	15	1	0.504895	0.997656	0.817813	0.891669	0.493199	0.350733	0.698368	0.644481	1	0.410688	0.459585	Psa	0.689091	25C	2.85117	2.43494	2.43494
CG1009-RD	0.576952	1	24	15	1	0.504895	0.997656	0.817813	0.891669	0.493199	0.350733	0.698368	0.644481	1	0.410688	0.459585	Psa	0.689091	25C	2.85117	2.43494	2.43494
CG1009-RE	0.576952	1	24	15	1	0.504895	0.997656	0.817813	0.891669	0.493199	0.350733	0.698368	0.644481	1	0.410688	0.459585	Psa	0.689091	25C	2.85117	2.43494	2.43494
CG1009-RF	0.576952	1	24	15	1	0.504895	0.997656	0.817813	0.891669	0.493199	0.350733	0.698368	0.644481	1	0.410688	0.459585	Psa	0.689091	25C	2.85117	2.43494	2.43494
CG10091-RA	0.576952	1	24	9	0.387012	1	0.504177	0.520097	0.385141	0.466421	1	0.980628	0.692574	0.902871	0.690139	0.812955	GstD9	0.695168	25C	2.59645	1.44898	1.44898
CG10092-RA	1	1	24	1	0.976173	0.936124	0.734762	0.666341	0.777164	1	0.691004	0.359343	1	0.693208	0.878479	0.624172	CG10092	0.778064	25C	1.50073	2.78286	1.50073
CG10095-RA	1	1	24	1	1	0.580119	0.72053	0.530915	0.743057	0.937367	0.460669	0.359343	1	0.148545	0.669317	0.735632	dpr15	0.657124	25C	2.17076	6.73199	2.17076
CG10098-RA	1	1	24	3	0.830833	0.751141	1	0.73684	0.813788	0.870834	0.421742	0.531425	0.625982	0.317315	0.343695	1	CG10098	0.686966	25C	2.37112	3.15144	2.37112
CG10103-RA	0.772187	1	24	13	0.901521	0.707806	1	0.93522	0.608182	0.98071	0.484053	0.723167	0.884538	1	0.63624	0.675309	CG10103	0.794729	25C	2.06589	1.57173	1.57173
CG10105-RA	1	1	24	9	0.82244	0.479244	1	0.73684	0.45834	0.433647	1	0.52003	0.836143	0.351116	0.480272	0.632299	Sin1	0.645864	25C	2.30602	2.84806	2.30602
CG10106-RA	1	1	24	13	0.833653	1	0.822053	0.800784	0.708857	0.819302	0.766075	0.643171	0.756903	1	0.727504	0.606527	Tsp42Ee	0.790402	25C	1.41072	1.64873	1.41072
CG10107-RA	0.300911	1	24	15	1	0.650244	0.852165	0.704483	0.628741	0.497526	0.406717	0.385241	0.672673	1	0.627862	0.501869	velo	0.660627	25C	2.45871	2.59578	2.45871
CG10107-RB	0.300911	1	24	15	1	0.650244	0.852165	0.704483	0.628741	0.497526	0.406717	0.385241	0.672673	1	0.627862	0.501869	velo	0.660627	25C	2.45871	2.59578	2.45871
CG10107-RC	0.300911	1	24	15	1	0.650244	0.852165	0.704483	0.628741	0.497526	0.406717	0.385241	0.672673	1	0.627862	0.501869	velo	0.660627	25C	2.45871	2.59578	2.45871
CG10108-RA	0.663955	1	24	3	1	0.764515	0.790331	0.701803	0.696616	0.590541	1	0.547691	0.692794	0.1921	0.59508	0.929709	phyl	0.708432	25C	1.69336	5.20562	1.69336
CG10109-RA	1	1	24	21	0.584219	0.902626	0.997871	0.623111	1	0.915321	0.347317	0.699883	0.356027	0.783955	0.478342	1	L	0.724056	25C	2.87922	2.80878	2.80878
CG10110-RA	0.772187	1	24	3	1	0.596694	0.378278	0.438005	0.52014	0.224968	0.89147	0.572672	0.986554	0.23673	1	0.746041	Cpsf160	0.632629	25C	4.44508	4.22422	4.22422
CG10110-RB	0.772187	1	24	3	1	0.596694	0.378278	0.438005	0.52014	0.224968	0.89147	0.572672	0.986554	0.23673	1	0.746041	Cpsf160	0.632629	25C	4.44508	4.22422	4.22422
CG10112-RA	0.209359	1	24	15	0.334852	0.0832517	0.361906	1	0.746442	0.282491	0	0.898357	1	0.519906	0.878479	0.234065	Cpr51A	0.528312	25C	Inf	4.27232	4.27232
CG10117-RA	1	1	24	21	0.508009	0.50521	0.480421	0.859699	0.754959	1	1	0.32844	0.856877	0.653393	0.702565	0.401129	ttv	0.670892	25C	2.08151	3.0447	2.08151
CG10118-RA	1	1	24	13	0.148969	1	0.724521	0.088976	0.332077	0.754048	0.536301	0.67298	0.401557	1	0.409082	0.587637	ple	0.554679	25C	11.239	2.49031	2.49031
CG10118-RB	1	1	24	13	0.148969	1	0.724521	0.088976	0.332077	0.754048	0.536301	0.67298	0.401557	1	0.409082	0.587637	ple	0.554679	25C	11.239	2.49031	2.49031
CG10119-RA	1	1	24	9	0.989579	1	0.646894	0.915182	0.978442	0.700187	0.831283	0.709229	1	0.867813	0.462357	0.802507	LamC	0.825289	25C	1.54585	2.16283	1.54585
CG10120-RA	1	1	24	1	0.791393	0.697597	0.795871	0.677427	1	0.867579	1	0.912349	0.657107	0.646047	0.750206	0.617616	Men	0.784433	25C	1.47617	1.61913	1.47617
CG10120-RB	1	1	24	1	0.791393	0.697597	0.795871	0.677427	1	0.867579	1	0.912349	0.657107	0.646047	0.750206	0.617616	Men	0.784433	25C	1.47617	1.61913	1.47617
CG10121-RA	1	1	24	3	0.904612	0.837585	0.960842	0.819774	0.625821	1	0.926731	1	0.49175	0.488086	0.628352	0.455174	SP1173	0.761561	25C	1.5979	2.19696	1.5979
CG10121-RB	1	1	24	3	0.904612	0.837585	0.960842	0.819774	0.625821	1	0.926731	1	0.49175	0.488086	0.628352	0.455174	SP1173	0.761561	25C	1.5979	2.19696	1.5979
CG10121-RC	1	1	24	3	0.904612	0.837585	0.960842	0.819774	0.625821	1	0.926731	1	0.49175	0.488086	0.628352	0.455174	SP1173	0.761561	25C	1.5979	2.19696	1.5979
CG10121-RD	1	1	24	3	0.904612	0.837585	0.960842	0.819774	0.625821	1	0.926731	1	0.49175	0.488086	0.628352	0.455174	SP1173	0.761561	25C	1.5979	2.19696	1.5979
CG10122-RA	1	1	24	15	0.638267	0.544072	0.591288	0.707987	0.440393	1	0.54823	0.762322	0.776135	0.69943	1	0.266443	RpI1	0.664547	25C	2.2707	3.75315	2.2707
CG10123-RA	1	1	24	1	0.493897	0.0736764	0.720632	0.412992	0.220196	1	0.33048	0.468708	1	0.271255	0.763894	0.824315	Top3alpha	0.548337	25C	13.5729	3.68656	3.68656
CG10126-RA	0.353312	1	24	17	0.707908	0.779437	0.564719	1	0.976887	0.673049	0.656343	0.639971	0.685665	1	0.823983	0.566926	CG10126	0.756241	25C	1.77079	1.7639	1.7639
CG10126-RB	0.353312	1	24	17	0.707908	0.779437	0.564719	1	0.976887	0.673049	0.656343	0.639971	0.685665	1	0.823983	0.566926	CG10126	0.756241	25C	1.77079	1.7639	1.7639
CG10128-RA	1	1	24	15	0.426772	0.563173	0.771711	1	0.365903	0.775466	0.968113	0.707973	0.831858	0.27315	1	0.430408	tra2	0.676211	25C	2.73296	3.66099	2.73296
CG10128-RB	1	1	24	15	0.426772	0.563173	0.771711	1	0.365903	0.775466	0.968113	0.707973	0.831858	0.27315	1	0.430408	tra2	0.676211	25C	2.73296	3.66099	2.73296
CG10128-RC	1	1	24	15	0.426772	0.563173	0.771711	1	0.365903	0.775466	0.968113	0.707973	0.831858	0.27315	1	0.430408	tra2	0.676211	25C	2.73296	3.66099	2.73296
CG10128-RD	1	1	24	15	0.426772	0.563173	0.771711	1	0.365903	0.775466	0.968113	0.707973	0.831858	0.27315	1	0.430408	tra2	0.676211	25C	2.73296	3.66099	2.73296
CG10128-RE	1	1	24	15	0.426772	0.563173	0.771711	1	0.365903	0.775466	0.968113	0.707973	0.831858	0.27315	1	0.430408	tra2	0.676211	25C	2.73296	3.66099	2.73296
CG10128-RF	1	1	24	15	0.426772	0.563173	0.771711	1	0.365903	0.775466	0.968113	0.707973	0.831858	0.27315	1	0.430408	tra2	0.676211	25C	2.73296	3.66099	2.73296
CG10128-RG	1	1	24	15	0.426772	0.563173	0.771711	1	0.365903	0.775466	0.968113	0.707973	0.831858	0.27315	1	0.430408	tra2	0.676211	25C	2.73296	3.66099	2.73296
CG10130-RA	0.663955	1	24	17	0.871532	0.872432	0.855188	1	0.869145	0.780398	0.804386	0.745226	0.804113	1	0.830684	0.794776	Sec61beta	0.852323	25C	1.2814	1.34187	1.2814
CG10131-RA	0.0729854	1	24	7	0.904207	1	0.88459	0.623867	0.590789	0.802272	0.755451	1	0.886208	0.697577	0.989514	0.849106	CG10131	0.831965	25C	1.69265	1.43353	1.43353
CG10132-RA	1	1	24	15	0.453223	0.676089	0.819542	0.874572	0.738305	1	1	0.581488	0.986707	0.656633	0.647211	0.480383	CG10132	0.742846	25C	2.20642	2.08167	2.08167
CG10133-RA	0.209359	1	24	21	0.621134	0.205904	0.559432	0.494654	1	0.873346	0.719926	0.820762	0.721284	1	0.985651	0.956687	CG10133	0.746565	25C	4.85663	1.38642	1.38642
CG10137-RA	0.353312	1	24	5	1	0.397796	0.756556	0.617189	0.78021	0.365573	1	0.788809	0.934969	0.405785	0.742787	0.959105	CG10137	0.729065	25C	2.73543	2.46436	2.46436
CG10139-RA	1	1	24	3	0.490491	0.640223	0.894577	0.7324	0.820042	1	0.614647	1	0.393921	0.158556	0.334888	0.553218	CG10139	0.63608	25C	2.03877	6.30691	2.03877
CG10142-RA	1	1	24	3	0.856413	0.922669	0.936625	0.746978	1	0.837177	0.656043	0.723329	0.565992	0.412917	0.34484	1	Ance-5	0.750248	25C	1.52429	2.89989	1.52429
CG10144-RA	1	1	24	1	0.669982	0.538158	0.960842	0.461731	0.172328	1	0.517928	0.56561	0.599624	0.0584528	0.98767	1	CG10144	0.627694	25C	5.8029	17.1078	5.8029
CG10145-RA	1	1	24	15	0.99007	1	0.58519	0.665267	0.620729	0.870055	0.647507	0.465209	0.739779	1	0.97482	0.450206	mspo	0.750736	25C	1.70885	2.22121	1.70885
CG10146-RA	1	1	24	9	0.33518	1	0.349323	0.0857983	0.0533696	0.121186	1	0.381355	0.514549	0.652073	0.734533	0.767791	AttA	0.499597	25C	18.7373	2.62223	2.62223
CG10147-RA	0.209359	1	24	3	1	0.149174	0.324238	0.334476	0.0891669	0.371197	0.902059	0.639678	0.237351	0.185101	0.417016	1	CG10147	0.470788	25C	11.2149	5.40247	5.40247
CG10149-RA	1	1	24	21	0.796268	0.816627	0.843488	0.821481	0.988362	1	0.48918	0.781164	0.677874	1	0.539761	0.628412	Rpn6	0.781885	25C	2.04424	1.85267	1.85267
CG10149-RB	1	1	24	21	0.796268	0.816627	0.843488	0.821481	0.988362	1	0.48918	0.781164	0.677874	1	0.539761	0.628412	Rpn6	0.781885	25C	2.04424	1.85267	1.85267
CG10151-RA	1	1	24	9	1	0.331497	0.495364	0.895919	0.495372	0.421815	0.699261	1	0.484892	0.657648	0.888975	0.236861	CG10151	0.633967	25C	3.01662	4.22188	3.01662
CG10151-RB	1	1	24	9	1	0.331497	0.495364	0.895919	0.495372	0.421815	0.699261	1	0.484892	0.657648	0.888975	0.236861	CG10151	0.633967	25C	3.01662	4.22188	3.01662
CG10151-RC	1	1	24	9	1	0.331497	0.495364	0.895919	0.495372	0.421815	0.699261	1	0.484892	0.657648	0.888975	0.236861	CG10151	0.633967	25C	3.01662	4.22188	3.01662
CG10151-RD	1	1	24	9	1	0.331497	0.495364	0.895919	0.495372	0.421815	0.699261	1	0.484892	0.657648	0.888975	0.236861	CG10151	0.633967	25C	3.01662	4.22188	3.01662
CG10152-RA	1	1	24	9	0.346967	0.37381	1	0.828945	0.644541	0.5529	0.807437	0.905391	0.74857	0.28477	0.641563	1	beat-IV	0.677908	25C	2.88212	3.5116	2.88212
CG10153-RA	0.772187	1	24	13	0.913809	0.879859	0.969682	0.903049	1	0.644767	0.683006	0.599973	0.725737	1	0.578874	0.562757	Trs31	0.788459	25C	1.55095	1.77697	1.55095
CG10155-RA	0.00325557	0.510342	24	9	0.82997	1	0.776273	0.305061	0.0711594	0.323163	0.620902	0.890545	1	0.678138	0.127316	0.65131	Spred	0.606153	25C	14.053	7.85449	7.85449
CG10157-RA	1	1	24	15	0.4601	0.606273	0.739694	0.719081	1	0.918631	0.631434	0.947921	1	0.847088	0.764882	0.792995	CG10157	0.785675	25C	2.17344	1.30739	1.30739
CG10158-RA	0.772187	1	24	3	1	0.889304	0.405298	0.781058	0.857374	0.681394	0.466174	1	0.783056	0.300639	0.783145	0.812096	CG10158	0.729961	25C	2.46732	3.32625	2.46732
CG10159-RA	1	1	24	1	0.869157	0.376418	0.477266	0.485637	1	0.591328	0.472308	1	0.549249	0.647264	0.965006	0.53138	BEAF-32	0.663751	25C	2.65662	1.88189	1.88189
CG10159-RB	1	1	24	1	0.869157	0.376418	0.477266	0.485637	1	0.591328	0.472308	1	0.549249	0.647264	0.965006	0.53138	BEAF-32	0.663751	25C	2.65662	1.88189	1.88189
CG10160-RA	1	1	24	1	1	0.497245	0.450331	0.464551	0.804979	0.538986	1	0.532412	0.826954	0.537423	0.787	0.225821	ImpL3	0.638808	25C	2.22059	4.42829	2.22059
CG10161-RB	0.576952	1	24	23	0.915984	0.788311	0.849107	0.934275	1	0.955042	0.899165	1	0.842266	0.723413	0.928074	0.983839	eIF-3p66	0.901623	25C	1.26854	1.38234	1.26854
CG10165-RA	0.489949	1	24	19	0.747662	0.736107	0.509083	0.821676	1	0.80736	0.611793	0.971496	0.94861	0.937057	1	0.86594	CG10165	0.829732	25C	1.96432	1.15481	1.15481
CG10165-RB	0.489949	1	24	19	0.747662	0.736107	0.509083	0.821676	1	0.80736	0.611793	0.971496	0.94861	0.937057	1	0.86594	CG10165	0.829732	25C	1.96432	1.15481	1.15481
CG10166-RA	1	1	24	13	0.565784	0.930123	0.552218	1	0.669224	0.662393	0.743769	0.816706	0.952165	0.697356	0.509148	1	CG10166	0.75824	25C	1.81088	1.96407	1.81088
CG1017-RA	1	1	24	7	0.672896	0.529774	0.484841	0.647516	1	0.189225	0.786592	0.951044	0.739916	0.177548	1	0.399665	Mfap1	0.631585	25C	5.28471	5.63229	5.28471
CG10171-RA	0.880418	1	24	5	0.804432	1	0.59773	0.440431	0.747174	0.735197	0.235465	1	0.946551	0.649595	0.66522	0.957114	CG10171	0.731576	25C	4.24691	1.53942	1.53942
CG10171-RB	0.880418	1	24	5	0.804432	1	0.59773	0.440431	0.747174	0.735197	0.235465	1	0.946551	0.649595	0.66522	0.957114	CG10171	0.731576	25C	4.24691	1.53942	1.53942
CG10173-RA	1	1	24	1	1	0.321747	0.476821	0.5153	0.961604	0.297752	1	0.508103	0.624009	0.579825	0.606496	0.568696	Best2	0.621696	25C	3.3585	1.96811	1.96811
CG10175-RA	0.421631	1	24	17	0.47836	0.428152	0.542859	1	0.746442	0.48427	0.340148	0.729659	0.492252	0.143958	1	0.540088	CG10175	0.577182	25C	2.9399	6.94649	2.9399
CG10175-RB	0.421631	1	24	17	0.47836	0.428152	0.542859	1	0.746442	0.48427	0.340148	0.729659	0.492252	0.143958	1	0.540088	CG10175	0.577182	25C	2.9399	6.94649	2.9399
CG10175-RC	0.421631	1	24	17	0.47836	0.428152	0.542859	1	0.746442	0.48427	0.340148	0.729659	0.492252	0.143958	1	0.540088	CG10175	0.577182	25C	2.9399	6.94649	2.9399
CG10176-RA	0.576952	1	24	5	1	0.745868	0.72053	0.663644	0.247686	0.937367	0.331298	1	0.42733	0.487694	0.604304	0.76115	CG10176	0.660572	25C	4.03737	2.34011	2.34011
CG10178-RA	0.421631	1	24	3	0.886022	0.741229	0.766733	0.72229	0.680607	1	0.772583	1	0.632747	0.76653	0.733944	0.974897	CG10178	0.806465	25C	1.46928	1.58041	1.46928
CG10181-RA	1	1	24	1	0.84025	0.481228	0.778404	0.609407	0.88636	1	0.777896	0.74881	1	0.76585	0.978425	0.639123	Mdr65	0.792146	25C	2.07802	1.56465	1.56465
CG10184-RA	1	1	24	3	0.377939	0.627851	0.55701	0.60538	0.84249	1	0.774314	1	0.441547	0.324089	0.391149	0.458564	CG10184	0.616695	25C	2.64593	3.08557	2.64593
CG10186-RA	0.421631	1	24	21	1	0.802042	0.878428	0.997132	0.876745	0.977764	0.907769	0.75785	0.841442	0.820558	1	0.898706	CG10186	0.896536	25C	1.24682	1.31952	1.24682
CG10186-RC	0.421631	1	24	21	1	0.802042	0.878428	0.997132	0.876745	0.977764	0.907769	0.75785	0.841442	0.820558	1	0.898706	CG10186	0.896536	25C	1.24682	1.31952	1.24682
CG10186-RD	1	1	24	23	0.910009	0.93144	0.983532	1	0.917685	0.99038	0.907769	0.75785	0.841442	0.820558	1	0.898706	CG10186	0.913281	25C	1.1016	1.31952	1.1016
CG10186-RE	0.421631	1	24	21	1	0.802042	0.878428	0.997132	0.876745	0.977764	0.907769	0.75785	0.841442	0.820558	1	0.898706	CG10186	0.896536	25C	1.24682	1.31952	1.24682
CG10186-RF	0.421631	1	24	21	1	0.802042	0.878428	0.997132	0.876745	0.977764	0.907769	0.75785	0.841442	0.820558	1	0.898706	CG10186	0.896536	25C	1.24682	1.31952	1.24682
CG10188-RA	1	1	24	21	1	0.333678	0.639944	0.927355	0.821274	0.732626	0.756814	0.680184	1	0.854131	0.460155	0.835945	CG10188	0.753509	25C	2.9969	2.17318	2.17318
CG10188-RB	1	1	24	21	1	0.333678	0.639944	0.927355	0.821274	0.732626	0.756814	0.680184	1	0.854131	0.460155	0.835945	CG10188	0.753509	25C	2.9969	2.17318	2.17318
CG10189-RA	0.772187	1	24	1	0.755532	0.422645	0.727262	0.676895	1	0.398368	0.913774	0.877273	0.203444	0.158658	0.804245	1	CG10189	0.661508	25C	2.51024	6.30288	2.51024
CG1019-RA	0.353312	1	24	21	0.897194	0.820703	0.75928	0.94368	1	0.837827	0.55637	0.725816	0.635106	0.692869	1	0.79933	Mlp84B	0.805681	25C	1.79737	1.57454	1.57454
CG1019-RB	0.353312	1	24	21	0.897194	0.820703	0.75928	0.94368	1	0.837827	0.55637	0.725816	0.635106	0.692869	1	0.79933	Mlp84B	0.805681	25C	1.79737	1.57454	1.57454
CG10192-RA	1	1	24	1	1	0.392562	0.469292	0.345793	0.23465	0.133205	0.531637	0.483818	0.512913	1	0.642081	0.738337	eIF4G2	0.540357	25C	7.50724	2.06689	2.06689
CG10194-RA	1	1	24	1	0.725512	0.666014	0.316668	1	0.746442	0.329573	0.533282	0.405585	0.405169	0.270835	1	0.514822	CG10194	0.576159	25C	3.15789	3.69228	3.15789
CG10197-RA	0.170207	1	24	19	0.418565	0.312194	0.339287	1	0.699789	0.353114	0.221516	0.0575974	0	1	0.563229	0.225103	kn	0.432533	25C	4.51435	Inf	4.51435
CG10197-RB	0.170207	1	24	19	0.418565	0.312194	0.339287	1	0.699789	0.353114	0.221516	0.0575974	0	1	0.563229	0.225103	kn	0.432533	25C	4.51435	Inf	4.51435
CG10197-RC	0.170207	1	24	19	0.418565	0.312194	0.339287	1	0.699789	0.353114	0.221516	0.0575974	0	1	0.563229	0.225103	kn	0.432533	25C	4.51435	Inf	4.51435
CG10198-RA	1	1	24	3	1	0.532763	0.318448	0.554616	0.199033	0.542334	0.487334	0.691168	0.384685	1	0.760359	0.83288	Nup98-96	0.608635	25C	5.02429	2.59953	2.59953
CG10200-RA	0.248511	1	24	9	0.8655	0.891243	1	0.740698	0.669513	0.572142	0.893753	0.997337	1	0.653774	0.815354	0.93766	hui	0.836415	25C	1.74782	1.52958	1.52958
CG10200-RB	0.248511	1	24	9	0.8655	0.891243	1	0.740698	0.669513	0.572142	0.893753	0.997337	1	0.653774	0.815354	0.93766	hui	0.836415	25C	1.74782	1.52958	1.52958
CG10203-RA	1	1	24	9	1	0.943303	0.810596	0.632413	0.688421	0.421815	0.834997	0.802369	0.455333	0.628246	1	0.332029	x16	0.71246	25C	2.37071	3.01178	2.37071
CG10205-RA	0.141715	1	24	9	0.743169	0.781571	1	0.954341	0.629528	0.764891	0.818896	1	0.901116	0.614163	0.718437	0.632758	CG10205	0.796573	25C	1.58849	1.62823	1.58849
CG10205-RB	0.141715	1	24	9	0.743169	0.781571	1	0.954341	0.629528	0.764891	0.818896	1	0.901116	0.614163	0.718437	0.632758	CG10205	0.796573	25C	1.58849	1.62823	1.58849
CG10206-RA	1	1	24	21	0.308415	0.966155	1	0.663156	0.893763	0.858622	0.647372	0.684165	0.750493	0.879882	1	0.919583	nop5	0.797634	25C	3.24238	1.46164	1.46164
CG10208-RA	0.489949	1	24	23	0.495693	0.755518	0.419277	0.707987	0.720643	1	0.712152	0.56561	0.683947	0.613755	0.526757	1	CG10208	0.683445	25C	2.38506	1.89841	1.89841
CG1021-RD	1	1	24	13	0.74638	1	0.784276	0.709974	0.847311	0.594687	0.541279	1	0.721482	0.835944	0.796785	0.752693	Dmtn	0.777568	25C	1.84747	1.38604	1.38604
CG1021-RE	1	1	24	13	0.74638	1	0.784276	0.709974	0.847311	0.594687	0.541279	1	0.721482	0.835944	0.796785	0.752693	Dmtn	0.777568	25C	1.84747	1.38604	1.38604
CG1021-RF	1	1	24	13	0.74638	1	0.784276	0.709974	0.847311	0.594687	0.541279	1	0.721482	0.835944	0.796785	0.752693	Dmtn	0.777568	25C	1.84747	1.38604	1.38604
CG1021-RG	1	1	24	13	0.74638	1	0.784276	0.709974	0.847311	0.594687	0.541279	1	0.721482	0.835944	0.796785	0.752693	Dmtn	0.777568	25C	1.84747	1.38604	1.38604
CG1021-RH	1	1	24	13	0.74638	1	0.784276	0.709974	0.847311	0.594687	0.541279	1	0.721482	0.835944	0.796785	0.752693	Dmtn	0.777568	25C	1.84747	1.38604	1.38604
CG10210-RA	1	1	24	9	0.398753	0.768327	0.673391	0.416792	1	0.364433	0.471905	0.683627	1	0	0.17141	0.890587	tst	0.569936	25C	2.74399	Inf	2.74399
CG10211-RA	1	1	24	15	1	0.559401	0.550047	0.799928	0.736423	0.557399	0.527418	0.148108	0.519019	1	0.375486	0.235822	CG10211	0.584088	25C	1.89603	6.75185	1.89603
CG10212-RA	1	1	24	3	1	0.596694	0.648477	0.119456	0.668752	0.674904	0.110758	0.86396	0.400713	1	0.704036	0.900411	SMC2	0.64068	25C	9.02871	2.49555	2.49555
CG10214-RA	1	1	24	13	0.738886	1	0.67139	0.718926	0.850118	0.804318	0.467644	0.268788	0.783617	1	0.250324	0.375171	CG10214	0.660765	25C	2.13838	3.99482	2.13838
CG10215-RA	0.300911	1	24	9	0.544668	1	0.781125	0.625613	0.56038	0.812958	0.959901	0.979155	0.69457	1	0.469358	0	Ercc1	0.702311	25C	1.83598	Inf	1.83598
CG10217-RA	0.421631	1	24	17	0.574204	0.910096	0.581809	0.814531	1	0.635796	0.738385	0.755165	0.890474	1	0.959575	0.967108	CG10217	0.818929	25C	1.74154	1.32421	1.32421
CG10217-RB	0.421631	1	24	17	0.574204	0.910096	0.581809	0.814531	1	0.635796	0.738385	0.755165	0.890474	1	0.959575	0.967108	CG10217	0.818929	25C	1.74154	1.32421	1.32421
CG10219-RA	0.772187	1	24	7	0.986042	0.93358	0.972187	1	0.955482	0.930319	0.983892	1	0.916307	0.908089	0.911621	0.909798	CG10219	0.95061	25C	1.0749	1.10121	1.0749
CG10221-RA	1	1	24	3	0.425625	1	0.638269	0.610121	0.711594	0.700187	0.675114	0.624802	0.596138	0.697356	0.320036	1	Hrd3	0.666604	25C	2.34948	3.12465	2.34948
CG10222-RA	1	1	24	9	0.837129	0.737913	0.740262	1	0.254469	0.449418	0.861056	0.527735	0.756557	0.555302	0.156381	1	CG10222	0.656352	25C	3.92975	6.39464	3.92975
CG10223-RA	0.0931041	1	24	23	0.71156	0.468291	0.678573	1	0.746442	0.882785	0.786592	0.711749	0.421183	0.603662	1	0.975182	Top2	0.748835	25C	2.13542	2.37427	2.13542
CG10225-RA	0.576952	1	24	1	0.785045	0.250946	0.818169	0.267938	1	0.946125	0.421742	0.855341	0.305166	0.0634631	0.428931	1	RanBP3	0.595239	25C	3.98493	15.7572	3.98493
CG10226-RA	0.880418	1	24	15	0.72721	0.668318	1	0.713571	0.810539	0.920245	0.56502	0.863613	1	0.999598	0.747435	0.760387	CG10226	0.814661	25C	1.76985	1.33791	1.33791
CG10228-RA	1	1	24	9	1	0.536093	0.379967	0.615944	0.592124	0.474542	0.779735	0.483818	0.692433	1	0.180233	0.432197	Inr-a	0.597257	25C	2.63181	5.54836	2.63181
CG10229-RA	0.209359	1	24	9	1	0.848746	0.922402	0.813536	0.538076	0.421815	0.824355	0.832162	1	0.71145	0.524005	0.91162	Kat60	0.779014	25C	2.37071	1.90838	1.90838
CG10230-RA	0.576952	1	24	13	1	0.876395	0.957516	0.716735	0.564259	0.54836	0.507063	0.700618	0.753842	1	0.486225	0.608481	Rpn9	0.726625	25C	1.97214	2.05666	1.97214
CG10230-RB	0.576952	1	24	13	1	0.876395	0.957516	0.716735	0.564259	0.54836	0.507063	0.701968	0.755094	1	0.486225	0.608481	Rpn9	0.726841	25C	1.97214	2.05666	1.97214
CG10233-RA	0.0363147	1	24	7	1	0.817	0.863605	0.726663	0.643848	0.893053	0.921258	1	0.897836	0.863196	0.811564	0.897391	rtp	0.861284	25C	1.55316	1.23219	1.23219
CG10234-RA	1	1	24	21	0.740196	0.80973	1	0.825261	0.935014	0.874233	0.252665	0.373434	0.423383	0.390212	0.490276	1	Hs2st	0.6762	25C	3.95781	2.67785	2.67785
CG10236-RA	1	1	24	21	0.67036	1	0.493992	0.964581	0.611324	0.668361	0.498175	0.736292	0.550194	0.828556	1	0.98584	LanA	0.750639	25C	2.02433	1.81754	1.81754
CG10237-RA	0.0931041	1	24	19	0.644842	0.495454	0.601427	1	0.965525	0.684926	0.874673	0.808515	0.86116	0.952469	1	0.753535	CG10237	0.803544	25C	2.01835	1.32708	1.32708
CG10237-RB	0.0931041	1	24	19	0.644842	0.495454	0.601427	1	0.965525	0.684926	0.874673	0.808515	0.86116	0.952469	1	0.753535	CG10237	0.803544	25C	2.01835	1.32708	1.32708
CG10237-RC	0.0931041	1	24	19	0.652611	0.495454	0.598278	1	0.961196	0.694758	0.874673	0.808515	0.86116	0.952469	1	0.753535	CG10237	0.804387	25C	2.01835	1.32708	1.32708
CG10238-RA	0.00851692	0.738571	24	9	0.595876	1	0.724521	0.44488	0.332077	0.125675	0.915698	1	0.891479	0.450959	0.402156	0.812096	Mocs2	0.641285	25C	7.95705	2.4866	2.4866
CG1024-RC	1	1	24	9	1	0.372934	0.135099	0.199093	0.185764	0.140605	0.609168	0.086396	0.560999	1	0.0704036	0.0562757	CG1024	0.368061	25C	7.40196	17.7697	7.40196
CG10240-RA	1	1	24	21	0.472207	0.528307	0.0765539	0.310244	1	0.717063	0.553789	0.172792	0.377816	1	0.402306	0.369812	Cyp6a22	0.498407	25C	13.0627	5.7873	5.7873
CG10242-RA	0.027207	1	24	3	0.746334	0.867744	0.791805	0.504769	0.58719	1	0.814089	0.61758	0.527567	0.383663	0.562972	1	Cyp6a23	0.70031	25C	1.98111	2.60645	1.98111
CG10244-RA	0.663955	1	24	15	0.298975	0.222996	0.678573	1	0.19994	0.353114	0.747615	0.755965	0.661177	1	0.950449	0.478344	Cad96Ca	0.612262	25C	5.0015	2.09055	2.09055
CG10245-RB	0.0931041	1	24	23	0.531671	0.582442	0.767665	0.585494	1	0.826983	0.752187	0.472039	0.401042	0.599981	0.668664	1	Cyp6a20	0.682347	25C	1.88086	2.4935	1.88086
CG10246-RB	0.576952	1	24	5	0.67036	1	0.543391	0.355904	0.498116	0.188512	1	0.818096	0.317671	0.660637	0.759684	0.768342	Cyp6a9	0.631726	25C	5.3047	3.14791	3.14791
CG10247-RA	0.00438993	0.514885	24	1	0.459627	0.433037	0.313744	0.303423	0.539256	1	0.553992	0.562917	0.195156	0.411335	0.667226	1	Cyp6a21	0.536643	25C	3.29573	5.12412	3.29573
CG10248-RA	0.00325557	0.510342	24	5	1	0.745868	0.748242	0.183778	0.428687	0.908525	0.915698	1	0.761973	0.103345	0.465654	0.558316	Cyp6a8	0.651674	25C	5.44134	9.67636	5.44134
CG10249-RA	1	1	24	13	0.601687	0.780485	0.720984	1	0.787263	0.529671	0.636162	0.838466	1	0.396119	0.697205	0.891675	CG10249	0.739976	25C	1.88797	2.52449	1.88797
CG10249-RB	1	1	24	13	0.601687	0.780485	0.720984	1	0.787263	0.529671	0.636162	0.838466	1	0.396119	0.697205	0.891675	CG10249	0.739976	25C	1.88797	2.52449	1.88797
CG10249-RC	1	1	24	13	0.601687	0.780485	0.720984	1	0.787263	0.529671	0.636162	0.838466	1	0.396119	0.697205	0.891675	CG10249	0.739976	25C	1.88797	2.52449	1.88797
CG10249-RD	1	1	24	13	0.601687	0.780485	0.720984	1	0.787263	0.529671	0.636162	0.838466	1	0.396119	0.697205	0.891675	CG10249	0.739976	25C	1.88797	2.52449	1.88797
CG10251-RB	1	1	24	1	0.846681	0.715714	0.549053	0.539419	0.37748	1	0.685096	0.336478	0.899649	0.286367	1	0.721975	prt	0.663159	25C	2.64915	3.49202	2.64915
CG10253-RA	1	1	24	3	1	0.792485	0.68394	0.914584	0.557293	0.975448	0.830683	0.820762	0.721284	1	0.586697	0.91917	CG10253	0.816862	25C	1.79439	1.70446	1.70446
CG10254-RA	1	1	24	9	1	0.273992	0.760967	0.438817	0.523173	0.533725	0.632082	0.821754	0.975713	0.919443	1	0.756508	CG10254	0.719681	25C	3.64974	1.32186	1.32186
CG10254-RB	1	1	24	9	1	0.273992	0.760967	0.438817	0.523173	0.533725	0.632082	0.821754	0.975713	0.919443	1	0.756508	CG10254	0.719681	25C	3.64974	1.32186	1.32186
CG10255-RA	0.300911	1	24	5	0.837129	0.663412	0.296876	1	0.583158	0.353114	0.838216	1	0.606521	0.222589	0.313421	0.651369	Lap1	0.613817	25C	3.36841	4.49259	3.36841
CG10257-RA	0.0363147	1	24	3	1	0.334355	0.586983	0.391321	0.691812	0.698177	0.702903	0.694508	0.486005	0.423087	0.992896	1	CG10257	0.666837	25C	2.99084	2.36358	2.36358
CG10260-RB	0.772187	1	24	17	0.690582	0.635102	1	0.64073	0.822023	0.707034	0.588172	0.715839	0.656335	0.839752	1	0.698513	PI4KIIIalpha	0.749507	25C	1.70018	1.52361	1.52361
CG10261-RA	1	1	24	13	0.592677	0.795705	0.984863	0.831885	0.462412	1	0.384518	0.267339	0.544365	1	0.297555	0.68805	aPKC	0.654114	25C	2.60066	3.74057	2.60066
CG10263-RA	1	1	24	13	0.348804	0.884549	0.395835	1	0.388772	0.529671	0.60507	0.943964	0.612948	0.751163	1	0.707099	Hakai	0.680656	25C	2.86694	1.63146	1.63146
CG10263-RC	1	1	24	13	0.348804	0.884549	0.395835	1	0.388772	0.529671	0.60507	0.943964	0.612948	0.751163	1	0.707099	Hakai	0.680656	25C	2.86694	1.63146	1.63146
CG10263-RD	1	1	24	13	0.348804	0.884549	0.395835	1	0.388772	0.529671	0.60507	0.943964	0.612948	0.751163	1	0.707099	Hakai	0.680656	25C	2.86694	1.63146	1.63146
CG10267-RA	1	1	24	1	1	0.610256	0.552679	0.542981	0.759945	0.613549	0.664427	0.393895	1	0.959827	0.168938	0.756209	Zif	0.668559	25C	1.84168	5.91932	1.84168
CG10268-RA	1	1	24	3	0.236598	1	0.255713	0.47105	0.263708	0.798404	1	0.751154	0.723585	0.501595	0.470855	0.338731	CG10268	0.567616	25C	4.22658	2.95219	2.95219
CG10269-RA	0.0592039	1	24	19	0.448597	0.0836485	0.454539	0.468891	1	0.662288	0.443031	0.734366	0.480856	1	0.880045	0.619033	D19A	0.606275	25C	11.9548	2.07962	2.07962
CG10270-RA	1	1	24	13	0.608821	0.596007	0.863639	1	0.84823	0.674126	0.616801	1	0.455059	0.655166	0.676516	0.614499	D19B	0.717405	25C	1.67783	2.19752	1.67783
CG10275-RB	1	1	24	21	1	0.621557	0.743046	0.622166	0.789498	0.913933	0.12658	0.567745	0.251877	1	0.241384	0.643151	kon	0.626745	25C	7.90012	4.14278	4.14278
CG10277-RA	0.421631	1	24	13	0.755302	0.619691	1	0.601502	0.589295	0.509757	0.635653	0.535906	0.701539	1	0.661182	0.502403	godzilla	0.676019	25C	1.96172	1.99043	1.96172
CG10277-RB	1	1	24	21	0.990743	0.580614	0.674024	0.644585	0.887359	1	0.635653	0.535906	0.701539	1	0.661182	0.502403	godzilla	0.734501	25C	1.72231	1.99043	1.72231
CG10277-RC	1	1	24	21	0.990743	0.580614	0.674024	0.644585	0.887359	1	0.635653	0.535906	0.701539	1	0.661182	0.502403	godzilla	0.734501	25C	1.72231	1.99043	1.72231
CG10277-RD	1	1	24	21	0.990743	0.580614	0.674024	0.644585	0.887359	1	0.635653	0.535906	0.701539	1	0.661182	0.502403	godzilla	0.734501	25C	1.72231	1.99043	1.72231
CG10279-RA	1	1	24	3	0.731491	0.790483	0.81016	0.836319	0.788402	1	0.984267	1	0.814415	0.805697	0.839998	0.919943	Rm62	0.860098	25C	1.36707	1.24116	1.24116
CG10279-RB	1	1	24	3	0.731491	0.790483	0.81016	0.836319	0.788402	1	0.984267	1	0.814415	0.805697	0.839998	0.919943	Rm62	0.860098	25C	1.36707	1.24116	1.24116
CG10279-RC	1	1	24	3	0.731491	0.790483	0.81016	0.836319	0.788402	1	0.984267	1	0.814415	0.805697	0.839998	0.919943	Rm62	0.860098	25C	1.36707	1.24116	1.24116
CG10279-RD	1	1	24	3	0.731491	0.790483	0.81016	0.836319	0.788402	1	0.984267	1	0.814415	0.805697	0.839998	0.919943	Rm62	0.860098	25C	1.36707	1.24116	1.24116
CG10279-RE	1	1	24	3	0.727935	0.794238	0.80336	0.837246	0.781195	1	0.984267	1	0.814415	0.805697	0.839998	0.919943	Rm62	0.859024	25C	1.37375	1.24116	1.24116
CG10279-RF	1	1	24	3	0.731491	0.790483	0.81016	0.836319	0.788402	1	0.984267	1	0.814415	0.805697	0.839998	0.919943	Rm62	0.860098	25C	1.36707	1.24116	1.24116
CG10281-RA	1	1	24	13	1	0.813674	0.736905	0.977366	0.607956	0.715808	0.701511	0.737213	0.853055	0.967655	0.84229	1	TfIIFalpha	0.829453	25C	1.64486	1.35646	1.35646
CG10283-RA	1	1	24	13	0.203139	1	0.559857	0.485324	0.2717	0.479849	0.212249	0.707409	0.656207	0.783955	0.858563	1	CG10283	0.601521	25C	4.92273	1.52391	1.52391
CG10283-RB	1	1	24	13	0.203139	1	0.559857	0.485324	0.2717	0.479849	0.212249	0.707409	0.656207	0.783955	0.858563	1	CG10283	0.601521	25C	4.92273	1.52391	1.52391
CG10286-RA	0.576952	1	24	17	0.725683	0.703642	1	0.73684	0.485301	0.918312	0.465183	0.691168	0.737313	1	0.985651	0.922922	CG10286	0.781001	25C	2.14969	1.44683	1.44683
CG10287-RA	1	1	24	15	1	0.478384	0.771464	0.54373	0.253664	0.43636	0.443031	0.598451	0.633323	1	0.721208	0.538051	Gasp	0.618139	25C	3.94222	1.85856	1.85856
CG10287-RB	1	1	24	1	1	0.665234	0.65724	0.48428	0.512107	0.889232	0.60507	0.786637	0.861046	0.637351	1	0.778834	Gasp	0.739753	25C	2.06492	1.569	1.569
CG10289-RA	0.209359	1	24	13	1	0.248623	0.810596	0.796372	0.185764	0.28121	0.240349	0.374966	1	0.406883	0.458337	0.183181	CG10289	0.498857	25C	5.38316	5.45908	5.38316
CG10293-RA	1	1	24	15	0.663143	0.494617	0.442681	0.559174	1	0.460722	0.442865	1	0.32045	0.789178	0.740813	0.118431	how	0.586006	25C	2.25896	8.44375	2.25896
CG10293-RC	0.663955	1	24	13	0.79408	0.930724	1	0.542043	0.647998	0.622059	0.762487	0.297387	1	0.752967	0.908771	0.435845	how	0.72453	25C	1.84487	3.36262	1.84487
CG10295-RA	0.300911	1	24	9	0.740196	0.736118	1	0.294736	0.68751	0.104075	0.640989	1	0.537043	0.456892	0.471781	0.308543	Pak	0.58149	25C	9.60842	3.24104	3.24104
CG10295-RB	0.300911	1	24	9	0.740196	0.736118	1	0.294736	0.68751	0.104075	0.640989	1	0.537043	0.456892	0.471781	0.308543	Pak	0.58149	25C	9.60842	3.24104	3.24104
CG10295-RC	0.300911	1	24	9	0.740196	0.736118	1	0.294736	0.68751	0.104075	0.640989	1	0.537043	0.456892	0.471781	0.308543	Pak	0.58149	25C	9.60842	3.24104	3.24104
CG10295-RD	0.880418	1	24	9	0.297938	1	0.845275	0.177952	0.996232	0.377024	0.640989	1	0.537043	0.456892	0.471781	0.308543	Pak	0.592472	25C	5.61949	3.24104	3.24104
CG10297-RA	1	1	24	13	0.0103932	1	0.0115839	0.0100874	0.0130321	0.012056	0.314447	1	0.892615	0.655166	0.707267	0.22122	Acp65Aa	0.403989	25C	99.1336	4.52039	4.52039
CG1030-RA	0.772187	1	24	13	0.692199	0.96518	1	0.742225	0.863199	0.639254	0.213663	1	0.412275	0.482275	0.72435	0.144749	Scr	0.656614	25C	4.68027	6.90853	4.68027
CG1030-RB	0.772187	1	24	13	0.692199	0.96518	1	0.742225	0.863199	0.639254	0.213663	1	0.412275	0.482275	0.72435	0.144749	Scr	0.656614	25C	4.68027	6.90853	4.68027
CG10302-RA	0.300911	1	24	21	0.592677	0.73317	0.867102	0.777059	0.902268	1	0.754155	0.727436	0.833212	0.604028	1	0.931178	bsf	0.81019	25C	1.68726	1.65555	1.65555
CG10305-RA	1	1	24	3	0.69418	1	0.855934	0.919442	0.925661	0.870758	0.953794	0.99044	0.903514	0.914856	0.929284	1	RpS26	0.913155	25C	1.44055	1.10679	1.10679
CG10305-RB	1	1	24	3	0.69418	1	0.855934	0.919442	0.925661	0.870758	0.953794	0.99044	0.903514	0.914856	0.929284	1	RpS26	0.913155	25C	1.44055	1.10679	1.10679
CG10305-RC	1	1	24	3	0.69418	1	0.855934	0.919442	0.925661	0.870758	0.953834	0.990503	0.903665	0.914781	0.929132	1	RpS26	0.913158	25C	1.44055	1.10661	1.10661
CG10306-RA	1	1	24	21	0.637407	0.929991	0.899657	0.896672	0.984652	1	0.838323	0.875469	0.880604	0.910976	0.877317	1	CG10306	0.894256	25C	1.56886	1.14225	1.14225
CG10307-RA	1	1	24	15	0.681868	0.843177	0.785443	0.728791	1	0.726624	0.540035	0.748892	0.877042	0.595934	0.823861	1	CG10307	0.779305	25C	1.85173	1.67804	1.67804
CG10309-RA	0.141715	1	24	3	0.67036	1	0.362261	0.133464	0.498116	0.565536	1	0.0600034	0.333962	0	0.293379	0.312675	pad	0.435813	25C	7.49265	Inf	7.49265
CG1031-RA	1	1	24	3	0.921745	1	0.339619	0.725711	0.0933967	0.494844	0.747816	0.760489	0.589207	0.525141	1	0.748668	alpha-Est1	0.66222	25C	10.707	1.90425	1.90425
CG10311-RA	0.0155956	0.853207	24	11	0.872589	0.860301	1	0.826698	0.860785	0.753065	0.562501	0.896465	1	0.83185	0.807584	0.561755	CG10311	0.819466	25C	1.77777	1.78014	1.77777
CG10315-RA	0.772187	1	24	17	0.86329	0.936582	0.954244	1	0.962211	0.948993	0.833787	0.63812	0.933432	0.213057	1	0.575517	eIF2B-delta	0.821603	25C	1.19935	4.69358	1.19935
CG10315-RB	0.772187	1	24	17	0.86329	0.936582	0.954244	1	0.962211	0.948993	0.833787	0.63812	0.933432	0.213057	1	0.575517	eIF2B-delta	0.821603	25C	1.19935	4.69358	1.19935
CG10315-RC	0.772187	1	24	17	0.86329	0.936582	0.954244	1	0.962211	0.948993	0.833787	0.63812	0.933432	0.213057	1	0.575517	eIF2B-delta	0.821603	25C	1.19935	4.69358	1.19935
CG10318-RA	1	1	24	15	0.198625	1	0.563517	0.563515	0.830193	0.125675	0.466349	0.691168	0.742374	1	0.97824	0.805631	NC2alpha	0.663774	25C	7.95705	1.44683	1.44683
CG10320-RA	1	1	24	19	0.807763	0.977424	0.866985	0.933044	1	0.843299	1	0.924512	0.890485	0.952861	0.907375	0.917425	CG10320	0.918431	25C	1.23799	1.12298	1.12298
CG10320-RB	1	1	24	19	0.807763	0.977424	0.866985	0.933044	1	0.843299	1	0.924512	0.890485	0.952861	0.907989	0.917425	CG10320	0.918482	25C	1.23799	1.12298	1.12298
CG10320-RC	1	1	24	19	0.807763	0.977424	0.866985	0.933044	1	0.843299	1	0.924512	0.890485	0.952861	0.907989	0.917425	CG10320	0.918482	25C	1.23799	1.12298	1.12298
CG10324-RA	1	1	24	15	0.722132	0.701832	0.922381	0.771138	1	0.830744	0.631775	0.277207	1	0.26738	0.602385	0.321003	CG10324	0.670665	25C	1.58284	3.73999	1.58284
CG10326-RA	1	1	24	9	0.7263	0.716987	0.900419	0.791054	1	0.810964	0.825814	1	0.853638	0.390554	0.509934	0.775249	CG10326	0.775076	25C	1.39472	2.56046	1.39472
CG10327-RA	0.248511	1	24	1	0.73213	0.494065	0.395641	0.812103	0.582873	1	0.774345	0.616608	0.770419	0.546198	0.553743	1	TBPH	0.689844	25C	2.52754	1.83084	1.83084
CG10327-RB	0.248511	1	24	1	0.73213	0.494065	0.395641	0.812103	0.582873	1	0.774345	0.616608	0.770419	0.546198	0.553743	1	TBPH	0.689844	25C	2.52754	1.83084	1.83084
CG10327-RC	1	1	24	3	1	0.307122	0.858278	0.878352	0.196692	0.694754	0.774345	0.616608	0.770419	0.546198	0.553743	1	TBPH	0.683043	25C	5.0841	1.83084	1.83084
CG10327-RD	0.248511	1	24	1	0.73213	0.494065	0.395641	0.812103	0.582873	1	0.774345	0.616608	0.770419	0.546198	0.553743	1	TBPH	0.689844	25C	2.52754	1.83084	1.83084
CG10328-RA	0.772187	1	24	23	0.598129	0.446126	0.415578	0.586911	1	0.684814	1	0.471655	0.68993	0.577417	0.591306	0.519913	nonA-l	0.631815	25C	2.40629	2.12019	2.12019
CG10333-RA	1	1	24	3	0.561483	0.860851	0.707989	0.577568	0.695357	1	0.912446	0.859007	0.30735	0.390605	1	0.575517	CG10333	0.704014	25C	1.781	3.25362	1.781
CG10334-RA	0.576952	1	24	1	0.476585	0.838544	0.653769	0.583907	0.789983	1	0.851539	0.833113	0.788477	0.765572	1	0.835996	spi	0.784791	25C	2.09826	1.30621	1.30621
CG10334-RB	0.576952	1	24	1	0.476585	0.838544	0.653769	0.583907	0.789983	1	0.851539	0.833113	0.788477	0.765572	1	0.835996	spi	0.784791	25C	2.09826	1.30621	1.30621
CG10334-RE	0.576952	1	24	1	0.476585	0.838544	0.653769	0.583907	0.789983	1	0.851539	0.833113	0.788477	0.765572	1	0.835996	spi	0.784791	25C	2.09826	1.30621	1.30621
CG10334-RF	0.576952	1	24	1	0.476585	0.838544	0.653769	0.583907	0.789983	1	0.851539	0.833113	0.788477	0.765572	1	0.835996	spi	0.784791	25C	2.09826	1.30621	1.30621
CG10334-RG	0.576952	1	24	1	0.476585	0.838544	0.653769	0.583907	0.789983	1	0.851539	0.833113	0.788477	0.765572	1	0.835996	spi	0.784791	25C	2.09826	1.30621	1.30621
CG10335-RA	1	1	24	15	0.897194	0.669188	0.339389	0.821676	1	0.2523	0.921505	0.248821	0.333394	1	0.27035	0.648296	Pbgs	0.616843	25C	3.96353	4.01896	3.96353
CG10337-RA	1	1	24	13	0.825058	1	0.731488	0.731486	0.617855	0.674293	0.184596	0.0575974	0.133571	1	0.140807	0.225103	CG10337	0.526821	25C	5.41723	17.3619	5.41723
CG10338-RA	1	1	24	21	0.401822	0.399608	0.271429	1	0.298577	0.903971	0.243667	0.65661	0.2244	1	0.535068	0.337654	CG10338	0.522734	25C	4.10396	4.45634	4.10396
CG10339-RA	0.772187	1	24	5	0.61683	0.368059	1	0.331578	0.481257	0.104075	1	0.357521	0.422091	0.0940491	0.264856	0.973853	CG10339	0.501181	25C	9.60842	10.6327	9.60842
CG10340-RA	0.141715	1	24	21	0.737809	0.874849	0.713077	1	0.991039	0.877797	0.782846	0.590202	0.631503	0.718645	1	0.730816	CG10340	0.804049	25C	1.40237	1.69433	1.40237
CG10341-RA	1	1	24	9	0.68176	0.895933	1	0.73684	0.651326	0.821647	0.730117	0.691565	1	0.235429	0.596702	0.927426	CG10341	0.747395	25C	1.53533	4.24756	1.53533
CG10342-RA	0.300911	1	24	23	0.846681	0.732554	0.494148	0.869813	0.717211	1	0.914641	0.856153	0.569166	0.867093	1	0.817919	NPF	0.807115	25C	2.02369	1.75696	1.75696
CG10343-RA	1	1	24	7	1	0.717181	0.779419	0.781058	0.600162	0.616499	0.475065	0.595563	0.785715	0.382967	0.733373	1	CG10343	0.705583	25C	2.10497	2.61119	2.10497
CG10344-RA	0.0363147	1	24	3	1	0.42621	0.231599	0.255977	0	0.361556	0.852855	0.460568	0.379762	0.14808	0.417016	1	CG10344	0.461135	25C	Inf	6.75309	6.75309
CG10344-RB	0.0214013	0.940446	24	3	1	0.42621	0.347398	0.255977	0	0.361556	0.852855	0.460568	0.379762	0.14808	0.417016	1	CG10344	0.470785	25C	Inf	6.75309	6.75309
CG10345-RA	1	1	24	15	0.534324	0.539195	1	0.581963	0.59555	0.589981	0.783607	0.630202	0.857102	0.644424	0.82631	1	CG10345	0.715221	25C	1.87152	1.58679	1.58679
CG10348-RA	0.300911	1	24	9	1	0.372934	0.752696	0.469291	0.23884	0.180778	0.427326	1	0.334974	0.401896	0.226359	0.144749	CG10348	0.462487	25C	5.53165	6.90853	5.53165
CG10353-RC	0.209359	1	24	23	0.700933	0.752837	0.477266	0.653098	1	0.520369	0.661168	0.575711	0.556292	0.485889	0.821	1	CG10353	0.683714	25C	2.09527	2.05808	2.05808
CG10353-RD	0.209359	1	24	23	0.700933	0.752837	0.477266	0.653098	1	0.520369	0.661168	0.575711	0.556292	0.485889	0.821	1	CG10353	0.683714	25C	2.09527	2.05808	2.05808
CG10354-RA	1	1	24	21	0.511329	0.728096	0.866642	0.59693	0.544015	1	0.323891	0.541391	0.234362	0.469979	1	0.493704	Rat1	0.609195	25C	3.08746	4.2669	3.08746
CG10360-RA	1	1	24	13	0.77432	1	0.639284	0.779373	0.575364	0.635094	0.921505	0.874328	0.753341	1	0.805418	0.571761	ref(2)P	0.777482	25C	1.73803	1.74898	1.73803
CG10360-RB	1	1	24	13	0.77432	1	0.639284	0.779373	0.575364	0.635094	0.921505	0.874328	0.753341	1	0.805418	0.571761	ref(2)P	0.777482	25C	1.73803	1.74898	1.73803
CG10361-RA	1	1	24	9	1	0.845317	0.648477	0.796372	0.854516	0.731146	0.460669	0.854988	1	0.752967	0.827991	0.645696	CG10361	0.784845	25C	2.17076	1.54872	1.54872
CG10362-RA	0.576952	1	24	17	0.382688	0.285434	0.736737	1	0.853077	0.48427	0.801564	0.517453	1	0.561499	0.948757	0.954984	CG10362	0.710539	25C	3.50343	1.93254	1.93254
CG10363-RA	0.248511	1	24	5	0.741373	1	0.709171	0.790605	0.854818	0.90342	0.948162	1	0.840301	0.718107	0.667456	0.85522	Tep4	0.835719	25C	1.4101	1.49823	1.4101
CG10365-RA	0.113223	1	24	9	0.893813	1	0.941878	0.950264	0.518041	0.78421	0.509792	1	0.792003	0.643034	0.705288	0.426628	CG10365	0.763746	25C	1.96158	2.34396	1.96158
CG10365-RB	0.113223	1	24	9	0.893813	1	0.941878	0.950264	0.518041	0.78421	0.509792	1	0.792003	0.643034	0.705288	0.426628	CG10365	0.763746	25C	1.96158	2.34396	1.96158
CG10365-RC	0.113223	1	24	9	0.893813	1	0.941878	0.950264	0.518041	0.78421	0.509792	1	0.792003	0.643034	0.705288	0.426628	CG10365	0.763746	25C	1.96158	2.34396	1.96158
CG10365-RD	0.113223	1	24	9	0.893813	1	0.941878	0.950264	0.518041	0.78421	0.509792	1	0.792003	0.643034	0.705288	0.426628	CG10365	0.763746	25C	1.96158	2.34396	1.96158
CG10366-RA	0.0729854	1	24	3	0.86622	0.918121	0.849976	0.435684	0.508145	1	0.83267	0.708567	0.684667	0.427155	0.673641	1	CG10366	0.742071	25C	2.29524	2.34107	2.29524
CG10369-RA	1	1	24	13	0.579551	0.864537	0.417584	1	0.43064	0.760553	0.829205	0.239562	1	0.970491	0.468522	0.312086	Irk3	0.656061	25C	2.39473	4.17429	2.39473
CG10369-RB	1	1	24	13	0.579551	0.864537	0.417584	1	0.43064	0.760553	0.829205	0.239562	1	0.970491	0.468522	0.312086	Irk3	0.656061	25C	2.39473	4.17429	2.39473
CG10370-RA	1	1	24	13	0.672906	0.616917	1	0.594496	0.625009	0.685951	0.659834	0.613963	0.7264	1	0.593188	0.598678	Rpt5	0.698945	25C	1.6821	1.68581	1.6821
CG10371-RA	0.576952	1	24	1	0.77468	0.605655	0.907883	0.735861	0.665791	1	0.821812	0.796734	0.637126	0.582992	1	0.894772	Plip	0.785275	25C	1.65111	1.71529	1.65111
CG10371-RB	0.576952	1	24	1	0.77468	0.605655	0.907883	0.735861	0.665791	1	0.821812	0.796734	0.637126	0.582992	1	0.894772	Plip	0.785275	25C	1.65111	1.71529	1.65111
CG10372-RA	1	1	24	15	0.458566	0.43869	0.694939	0.506105	1	0.74008	0.807943	0.713157	1	0.731868	0.675753	0.610369	Faf	0.698122	25C	2.27951	1.63835	1.63835
CG10373-RA	0.0729854	1	24	17	0.656783	0.714733	0.81167	1	0.984055	0.949206	0.818515	0.866285	0.789208	1	0.873889	0.99126	Jwa	0.8713	25C	1.52257	1.26709	1.26709
CG10374-RA	1	1	24	21	0.819405	0.919719	0.74159	0.931312	0.962066	1	0.793919	0.770675	1	0.889371	0.863526	0.902394	Lsd-1	0.882831	25C	1.34845	1.29756	1.29756
CG10374-RB	1	1	24	21	0.819405	0.919719	0.74159	0.931312	0.962066	1	0.793919	0.770675	1	0.889371	0.863526	0.902394	Lsd-1	0.882831	25C	1.34845	1.29756	1.29756
CG10374-RC	1	1	24	21	0.819405	0.919719	0.74159	0.931312	0.962066	1	0.793919	0.770675	1	0.889371	0.863526	0.902394	Lsd-1	0.882831	25C	1.34845	1.29756	1.29756
CG10375-RA	0.0214013	0.940446	24	17	0.700249	0.636545	0.798214	0.823418	1	0.701517	0.367622	0.374996	0.784375	1	0.659098	0.402311	CG10375	0.687362	25C	2.72019	2.6667	2.6667
CG10376-RA	1	1	24	1	0.497793	0.193715	1	0.594643	0.699572	0.693836	0.65771	1	0.548506	0.503244	0.892841	0.951565	CG10376	0.686119	25C	5.16221	1.98711	1.98711
CG10377-RA	1	1	24	15	0.770531	0.629824	0.701594	0.573702	1	0.365093	0.851558	0.572744	0.679091	1	0.756236	0.575029	Hrb27C	0.706284	25C	2.73903	1.74598	1.74598
CG10377-RB	1	1	24	1	0.770531	0.629824	0.701594	0.573702	1	0.365093	1	0.780045	0.608055	0.758715	0.833294	0.580682	Hrb27C	0.716795	25C	2.73903	1.72211	1.72211
CG10377-RC	1	1	24	15	0.770531	0.629824	0.701594	0.573702	1	0.365093	0.851558	0.572744	0.679091	1	0.756236	0.575029	Hrb27C	0.706284	25C	2.73903	1.74598	1.74598
CG10379-RA	0.880418	1	24	21	0.53016	0.395429	0.727262	0.755097	1	0.963327	0.542477	0.550103	0.480847	0.36734	1	0.248068	mbc	0.630009	25C	2.5289	4.03116	2.5289
CG10382-RA	1	1	24	13	0.731302	1	0.691589	0.727986	0.543399	0.925423	0.45469	0.536565	0.691758	1	0.859665	0.592376	wrapper	0.729563	25C	2.1993	1.86371	1.86371
CG10383-RA	1	1	24	13	0.55121	0.352397	1	0.67413	0.614371	0.553592	0.712905	1	0.416298	0.76223	0.341858	0.546514	CG10383	0.627125	25C	2.83771	2.92519	2.83771
CG10384-RA	1	1	24	13	0.402216	1	0.380374	0.320314	0.971326	0.395875	0.721214	0.594726	0.574045	1	0.406049	0.439736	CG10384	0.60049	25C	3.12194	2.46276	2.46276
CG10385-RA	1	1	24	21	0.179439	0.267675	0.581809	0.178625	1	0.65598	0.393626	0.959518	0.427232	0.555302	0.500419	1	msl-1	0.558302	25C	5.59832	2.34065	2.34065
CG10392-RA	1	1	24	15	0.894606	0.733984	0.616389	0.868286	0.972188	1	0.676206	0.545659	0.911096	1	0.741091	0.473901	sxc	0.786117	25C	1.62235	2.11015	1.62235
CG10392-RB	1	1	24	15	0.894606	0.733984	0.616389	0.868286	0.972188	1	0.676206	0.545659	0.911096	1	0.741091	0.473901	sxc	0.786117	25C	1.62235	2.11015	1.62235
CG10392-RC	1	1	24	15	0.894606	0.733984	0.616389	0.868286	0.972188	1	0.676206	0.545659	0.911096	1	0.741091	0.473901	sxc	0.786117	25C	1.62235	2.11015	1.62235
CG10395-RA	1	1	24	1	1	0.268512	0.259391	0.62117	0.668752	0.438688	0.490008	0.794632	0.531844	0.261956	1	0.537254	CG10395	0.572684	25C	3.85519	3.81744	3.81744
CG10399-RA	1	1	24	13	0.731047	0.941821	0.565648	0.635112	1	0.448533	0.793764	0.935957	0.894927	1	0.563229	0.881653	CG10399	0.782641	25C	2.22949	1.77548	1.77548
CG10406-RA	1	1	24	3	1	0.774282	0.748836	0.750865	0.54137	0.56242	0.679541	0.798739	0.599476	0.756416	1	0.969601	mRpS33	0.765129	25C	1.84716	1.66812	1.66812
CG10407-RA	0.0931041	1	24	3	1	0.870179	0.439073	0.423073	0.603734	0.738176	0.870153	0.91832	1	0.115535	0.650725	0.936259	CG10407	0.713769	25C	2.36366	8.65541	2.36366
CG1041-RA	1	1	24	3	0.750724	0.884117	0.67259	0.707987	0.792707	1	0.74164	1	0.728297	0.980493	0.848567	0.645986	CG1041	0.812759	25C	1.48679	1.54802	1.48679
CG1041-RB	1	1	24	3	0.750724	0.884117	0.67259	0.707987	0.792707	1	0.74164	1	0.728297	0.980493	0.848567	0.645986	CG1041	0.812759	25C	1.48679	1.54802	1.48679
CG10413-RA	1	1	24	13	0.943997	0.743952	0.577509	1	0.297783	0.555966	0.667045	1	0.693829	0.893973	0.927522	0.900266	CG10413	0.76682	25C	3.35815	1.44128	1.44128
CG10414-RA	1	1	24	3	0.628036	0.602269	0.727262	0.321525	1	0.37845	0.880478	0.808015	0.449718	0.584528	0.197534	1	Atac2	0.631485	25C	3.11018	5.06242	3.11018
CG10415-RA	1	1	24	15	0.384439	0.430111	0.493406	0.822796	0.249953	1	0.467444	0.499381	1	0.504615	0.736372	0.351097	TfIIEalpha	0.578301	25C	4.00076	2.84822	2.84822
CG10417-RA	1	1	24	9	1	0.359615	0.564522	0.597279	0.617003	0.647788	1	0.89148	0.637444	0.913619	0.544846	0.459707	CG10417	0.686109	25C	2.78075	2.1753	2.1753
CG10417-RB	1	1	24	9	1	0.359615	0.564522	0.597279	0.617003	0.647788	1	0.89148	0.637444	0.913619	0.544846	0.459707	CG10417	0.686109	25C	2.78075	2.1753	2.1753
CG10418-RA	1	1	24	13	0.634189	0.813596	0.575759	1	0.650309	0.727628	0.619596	0.871858	0.817543	0.493602	0.772252	1	CG10418	0.748028	25C	1.73684	2.02593	1.73684
CG10419-RA	1	1	24	13	0.134072	1	0	0.800784	0.448304	0.452429	0.542932	0.423511	1	0.334225	0.627485	0.250784	Gem2	0.50121	25C	Inf	3.9875	3.9875
CG10420-RA	1	1	24	15	1	0.186467	0.337748	0.497733	0.928822	0.56242	0.483703	0.727669	1	0.545901	0.702783	0.315987	CG10420	0.607436	25C	5.36288	3.16468	3.16468
CG10423-RA	1	1	24	3	0.820293	1	0.803536	0.939182	0.823134	0.929319	0.941385	0.936734	0.858974	0.806551	0.938931	1	RpS27	0.899837	25C	1.2445	1.23985	1.23985
CG10424-RA	1	1	24	13	0.323278	0.857326	0.81526	0.557808	0.480428	1	0.527035	1	0.432889	0.868095	0.651915	0.53557	CG10424	0.6708	25C	3.09331	2.31006	2.31006
[truncated: 12,604 more rows]

## Sheet: 29C
CycID	JTK_pvalue	JTK_BH.Q	JTK_period	JTK_adjphase	X29LD_zt3	X29LD_zt7	X29LD_zt11	X29LD_zt15	X29LD_zt19	X29LD_zt23	X29C_zt3	X29C_zt7	X29C_zt11	X29C_zt15	X29C_zt19	X29C_zt23	gene.name	mean.exp	temp	AMP_1	AMP_2	AMP_min
[truncated: 13,170 more rows]
