# Supplementary material for: Thermosensitive alternative splicing senses and mediates temperature adaptation in Drosophila
Source: eLife journal article supplement (doi:10.7554/elife.44642), 2019-11-08
Supplement: supp [file elife-44642-supp-v1.zip › elife_poa_e44642_Supplementary_file_4.xlsx]

## Sheet: DeSeq2_18vs25
baseMean	log2FoldChange	lfcSE	stat	pvalue	padj	name	names	lfc	express
635362	-0.212457	0.107859	-1.96976	0.0488654	0.151832	dme-bantam,dme-bantam-3p	bantam-3p	no	674985
19158.1	0.4321	0.154091	2.80418	0.00504446	0.0280129	dme-bantam,dme-bantam-5p	bantam-5p	p<.05	20924.5
2323.36	0.115111	0.129723	0.887365	0.374882	0.607729	dme-let-7,dme-let-7-3p	let-7-3p	no	2435.33
140515	-0.208148	0.223426	-0.93162	0.351533	0.580697	dme-let-7,dme-let-7-5p	let-7-5p	no	151070
394126	-0.388492	0.33652	-1.15444	0.248319	0.46848	dme-mir-1,dme-miR-1-3p	miR-1-3p	no	423070
68922.2	-0.454248	0.168364	-2.698	0.0069757	0.0357174	dme-mir-10,dme-miR-10-3p	miR-10-3p	p<.05	73802.1
26390.9	-0.326615	0.113759	-2.87112	0.00409025	0.0232077	dme-mir-10,dme-miR-10-5p	miR-10-5p	p<.05	27509.9
100.6	-0.525745	0.227966	-2.30624	0.0210971	0.0821841	dme-mir-100,dme-miR-100-3p	miR-100-3p	no	107.583
58564.5	-0.260582	0.118043	-2.20752	0.0272781	0.0974113	dme-mir-100,dme-miR-100-5p	miR-100-5p	no	61841.6
404.896	0.52516	0.141902	3.70087	0.000214861	0.00226911	dme-mir-1000,dme-miR-1000-3p	miR-1000-3p	p<.05	437.25
2358.59	-0.244142	0.150604	-1.62109	0.104999	0.26745	dme-mir-1000,dme-miR-1000-5p	miR-1000-5p	no	2438.92
56.735	0.472333	0.259443	1.82056	0.0686731	0.20139	dme-mir-1001,dme-miR-1001-3p	miR-1001-3p	no	60
589.117	0.363972	0.171515	2.1221	0.0338296	0.113199	dme-mir-1001,dme-miR-1001-5p	miR-1001-5p	no	631.917
526.967	-0.348937	0.273394	-1.27631	0.201845	0.418106	dme-mir-1003,dme-miR-1003-3p	miR-1003-3p	no	578.75
37.4773	0.582864	0.31522	1.84907	0.064448	0.193344	dme-mir-1003,dme-miR-1003-5p	miR-1003-5p	no	40.75
1365.83	-0.791254	0.212819	-3.71796	0.000200836	0.00226911	dme-mir-1004,dme-miR-1004-3p	miR-1004-3p	p<.05	1410.5
1485.01	-0.928797	0.129976	-7.14592	8.94e-13	1.17e-10	dme-mir-1004,dme-miR-1004-5p	miR-1004-5p	p<.05	1576.83
947.126	-0.624314	0.247674	-2.52071	0.0117118	0.0545852	dme-mir-1006,dme-miR-1006-3p	miR-1006-3p	no	1026.58
31.2169	0.158351	0.313921	0.504429	0.61396	0.793285	dme-mir-1006,dme-miR-1006-5p	miR-1006-5p	no	31.8333
25.5369	-0.498176	0.339107	-1.46908	0.141811	0.33083	dme-mir-1007,dme-miR-1007-3p	miR-1007-3p	no	26.5
504.312	-0.317864	0.221015	-1.4382	0.150377	0.344284	dme-mir-1008,dme-miR-1008-5p	miR-1008-5p	no	554.417
154.358	-0.0485566	0.301468	-0.161067	0.872041	0.92899	dme-mir-1009,dme-miR-1009-3p	miR-1009-3p	no	170.667
24358.2	-0.215314	0.0998347	-2.1567	0.031029	0.10656	dme-mir-1010,dme-miR-1010-3p	miR-1010-3p	no	25790.1
367.364	0.105818	0.191669	0.552087	0.580889	0.754289	dme-mir-1010,dme-miR-1010-5p	miR-1010-5p	no	403.167
9.32512	-1.01732	0.572005	-1.77851	0.0753199	0.216027	dme-mir-1011,dme-miR-1011-3p	miR-1011-3p	FC>2	9.75
308.426	0.228989	0.198849	1.15157	0.249497	0.46848	dme-mir-1012,dme-miR-1012-3p	miR-1012-3p	no	338.917
1904.04	-0.177459	0.230807	-0.768865	0.441974	0.652933	dme-mir-1012,dme-miR-1012-5p	miR-1012-5p	no	2071.33
1191.42	0.0309137	0.116056	0.266368	0.789956	0.920931	dme-mir-1013,dme-miR-1013-3p	miR-1013-3p	no	1300.75
16.0478	0.0975512	0.519505	0.187777	0.851051	0.923945	dme-mir-1015,dme-miR-1015-3p	miR-1015-3p	no	14.8333
253.29	-0.23648	0.138947	-1.70194	0.0887666	0.241334	dme-mir-1016,dme-miR-1016-3p	miR-1016-3p	no	268
40.2222	-0.0897916	0.353048	-0.254333	0.799239	0.923014	dme-mir-1016,dme-miR-1016-5p	miR-1016-5p	no	39.5833
4158.82	-0.581039	0.12555	-4.62793	3.69e-06	7.42e-05	dme-mir-1017,dme-miR-1017-3p	miR-1017-3p	p<.05	4377.42
180366	0.216569	0.129584	1.67127	0.0946684	0.252127	dme-mir-11,dme-miR-11-3p	miR-11-3p	no	186987
7892.33	0.111614	0.160669	0.694684	0.487253	0.689125	dme-mir-11,dme-miR-11-5p	miR-11-5p	no	8159.83
9.60846	-0.523476	0.518445	-1.0097	0.312637	0.557739	dme-mir-12,dme-miR-12-3p	miR-12-3p	no	10.8333
997.845	-0.370962	0.1441	-2.57434	0.010043	0.0485413	dme-mir-12,dme-miR-12-5p	miR-12-5p	p<.05	1061.5
149.631	0.0774683	0.286776	0.270135	0.787056	0.920931	dme-mir-124,dme-miR-124-3p	miR-124-3p	no	158.333
884.522	-0.14736	0.12731	-1.15749	0.247074	0.46848	dme-mir-124,dme-miR-124-5p	miR-124-5p	no	956.083
4738.94	0.258646	0.172078	1.50308	0.13282	0.315841	dme-mir-125,dme-miR-125-3p	miR-125-3p	no	4886.42
53655.2	-0.0177113	0.0861383	-0.205615	0.837092	0.923945	dme-mir-125,dme-miR-125-5p	miR-125-5p	no	56242.6
16687.7	-0.0364601	0.16173	-0.225439	0.821638	0.923945	dme-mir-133,dme-miR-133-3p	miR-133-3p	no	17284.7
1500.17	0.48664	0.126906	3.83464	0.000125748	0.00156287	dme-mir-133,dme-miR-133-5p	miR-133-5p	p<.05	1620.33
3403.68	-0.519446	0.169814	-3.05891	0.00222145	0.014495	dme-mir-137,dme-miR-137-3p	miR-137-3p	p<.05	3753.75
162.266	-0.429928	0.178055	-2.41458	0.0157533	0.0632555	dme-mir-137,dme-miR-137-5p	miR-137-5p	no	174.5
780.897	-0.378976	0.138186	-2.74251	0.00609717	0.0331534	dme-mir-13a,dme-miR-13a-3p	miR-13a-3p	p<.05	825.083
127.417	0.108026	0.292228	0.369661	0.711635	0.876116	dme-mir-13a,dme-miR-13a-5p	miR-13a-5p	no	130.5
388.715	-0.29417	0.120658	-2.43806	0.0147664	0.0602574	dme-mir-13b-1,dme-miR-13b-1-5p	miR-13b-1-5p	no	409.667
16277.6	-0.0784034	0.0808282	-0.97	0.332046	0.566432	dme-mir-13b-1,dme-miR-13b-3p	miR-13b-3p	no	16977.5
249.322	0.11634	0.174164	0.667991	0.504139	0.696192	dme-mir-13b-2,dme-miR-13b-2-5p	miR-13b-2-5p	no	258.25
16277.6	-0.0784034	0.0808282	-0.97	0.332046	0.566432	dme-mir-13b-2,dme-miR-13b-3p	miR-13b-3p	no	16977.5
2.01911e+06	0.259155	0.097053	2.67024	0.0075796	0.0373259	dme-mir-14,dme-miR-14-3p	miR-14-3p	p<.05	2.11594e+06
55419.4	0.790785	0.219517	3.60238	0.000315317	0.00304807	dme-mir-14,dme-miR-14-5p	miR-14-5p	p<.05	58302.7
558185	-0.308735	0.180417	-1.71123	0.0870383	0.239343	dme-mir-184,dme-miR-184-3p	miR-184-3p	no	589518
2501.03	0.508733	0.232669	2.18651	0.0287783	0.100149	dme-mir-184,dme-miR-184-5p	miR-184-5p	no	2571.92
158.688	-0.200206	0.25699	-0.779042	0.435955	0.652933	dme-mir-190,dme-miR-190-3p	miR-190-3p	no	173.25
7846.68	-0.498912	0.226448	-2.20321	0.0275801	0.0974113	dme-mir-190,dme-miR-190-5p	miR-190-5p	no	8323
269.923	0.647159	0.135669	4.77014	1.84e-06	4e-05	dme-mir-193,dme-miR-193-3p	miR-193-3p	p<.05	286.833
10760.4	-0.0789182	0.128956	-0.611977	0.540553	0.719818	dme-mir-193,dme-miR-193-5p	miR-193-5p	no	11459.9
19372.2	0.150489	0.203606	0.739115	0.459837	0.666764	dme-mir-210,dme-miR-210-3p	miR-210-3p	no	20094.9
10759.5	1.34791	0.311682	4.32463	1.53e-05	0.000249236	dme-mir-210,dme-miR-210-5p	miR-210-5p	p<.05 FC>2	11033.9
1816.3	0.41192	0.143163	2.87727	0.00401126	0.0232077	dme-mir-219,dme-miR-219-3p	miR-219-3p	p<.05	1984.67
566.838	0.0321582	0.225359	0.142698	0.886529	0.936777	dme-mir-219,dme-miR-219-5p	miR-219-5p	no	584.333
138.783	-0.73054	0.235778	-3.09842	0.00194556	0.0141053	dme-mir-2279,dme-miR-2279-5p	miR-2279-5p	p<.05	146.25
14.7975	0.435273	0.476216	0.914023	0.360704	0.5921	dme-mir-2489,dme-miR-2489-3p	miR-2489-3p	no	16
10.8592	0.660616	0.50617	1.30513	0.19185	0.407473	dme-mir-2493,dme-miR-2493-3p	miR-2493-3p	no	11.8333
51.7095	0.391127	0.320612	1.21994	0.222489	0.441441	dme-mir-2500,dme-miR-2500-3p	miR-2500-3p	no	54.25
445.16	0.556437	0.228251	2.43783	0.0147758	0.0602574	dme-mir-252,dme-miR-252-3p	miR-252-3p	no	455.417
54000.5	0.0904916	0.132436	0.683285	0.494427	0.690082	dme-mir-252,dme-miR-252-5p	miR-252-5p	no	56671.7
2381.04	-0.504587	0.168698	-2.99107	0.00277999	0.0172757	dme-mir-2535b,dme-miR-2535b-3p	miR-2535b-3p	p<.05	2510.08
252.104	0.727072	0.195673	3.71575	0.000202601	0.00226911	dme-mir-263a,dme-miR-263a-3p	miR-263a-3p	p<.05	270.667
58269.2	0.0082609	0.161381	0.0511889	0.959175	0.983887	dme-mir-263a,dme-miR-263a-5p	miR-263a-5p	no	61316.8
60.2182	0.179907	0.219948	0.817956	0.413382	0.642057	dme-mir-263b,dme-miR-263b-3p	miR-263b-3p	no	62.5
14787.8	-0.158498	0.164748	-0.962062	0.336019	0.568967	dme-mir-263b,dme-miR-263b-5p	miR-263b-5p	no	15075.5
13.0817	1.56835	0.512126	3.06244	0.00219543	0.014495	dme-mir-274,dme-miR-274-3p	miR-274-3p	p<.05 FC>2	13.0833
13326.5	-0.141377	0.147523	-0.958338	0.337892	0.568967	dme-mir-274,dme-miR-274-5p	miR-274-5p	no	14197.8
26412.8	0.30192	0.132711	2.27501	0.0229055	0.0877083	dme-mir-275,dme-miR-275-3p	miR-275-3p	no	27416.6
4057.47	0.286266	0.180272	1.58796	0.112295	0.274666	dme-mir-275,dme-miR-275-5p	miR-275-5p	no	4118.42
2.79588e+06	-0.0524399	0.146139	-0.358837	0.719717	0.877786	dme-mir-276a,dme-miR-276a-3p	miR-276a-3p	no	2.89449e+06
1672.26	0.561393	0.191684	2.92874	0.00340338	0.0201882	dme-mir-276a,dme-miR-276a-5p	miR-276a-5p	p<.05	1701.5
376364	-0.340883	0.143135	-2.38155	0.01724	0.0681762	dme-mir-276b,dme-miR-276b-3p	miR-276b-3p	no	390555
1672.26	0.561393	0.191684	2.92874	0.00340338	0.0201882	dme-mir-276b,dme-miR-276b-5p	miR-276b-5p	p<.05	1701.5
251911	0.0233681	0.125723	0.18587	0.852547	0.923945	dme-mir-277,dme-miR-277-3p	miR-277-3p	no	259829
8444.38	0.84865	0.197469	4.29764	1.73e-05	0.000265036	dme-mir-277,dme-miR-277-5p	miR-277-5p	p<.05	9150.42
27227.1	-0.181619	0.139214	-1.3046	0.192028	0.407473	dme-mir-278,dme-miR-278-3p	miR-278-3p	no	27877.4
6601.41	-0.0399792	0.127284	-0.314093	0.75345	0.902066	dme-mir-278,dme-miR-278-5p	miR-278-5p	no	7048.17
21367	0.205945	0.15293	1.34666	0.178089	0.387343	dme-mir-279,dme-miR-279-3p	miR-279-3p	no	22856.8
19.4319	0.439612	0.406166	1.08235	0.279099	0.51663	dme-mir-279,dme-miR-279-5p	miR-279-5p	no	22
17.2748	0.716299	0.371946	1.92582	0.0541271	0.166202	dme-mir-281-1,dme-miR-281-1-5p	miR-281-1-5p	no	19.25
6369.25	0.526793	0.15635	3.36931	0.000753566	0.00564813	dme-mir-281-1,dme-miR-281-3p	miR-281-3p	p<.05	6824.5
6369.25	0.526793	0.15635	3.36931	0.000753566	0.00564813	dme-mir-281-1,dme-miR-281-3p	miR-281-3p	p<.05	6828.5
3286.12	0.659602	0.134182	4.91574	8.84e-07	2.31e-05	dme-mir-281-2,dme-miR-281-2-5p	miR-281-2-5p	p<.05	3544.42
6373.1	0.526712	0.156391	3.36791	0.000757411	0.00564813	dme-mir-281-2,dme-miR-281-3p	miR-281-3p	p<.05	6824.5
6373.1	0.526712	0.156391	3.36791	0.000757411	0.00564813	dme-mir-281-2,dme-miR-281-3p	miR-281-3p	p<.05	6828.5
20.7081	0.575822	0.392113	1.46851	0.141965	0.33083	dme-mir-282,dme-miR-282-3p	miR-282-3p	no	22.4167
21.348	-0.317043	0.335491	-0.945013	0.344652	0.57663	dme-mir-282,dme-miR-282-5p	miR-282-5p	no	22.0833
100.054	-0.173329	0.199374	-0.869362	0.384649	0.610078	dme-mir-283,dme-miR-283-3p	miR-283-3p	no	109.083
12237.4	-0.668731	0.135456	-4.93689	7.94e-07	2.3e-05	dme-mir-283,dme-miR-283-5p	miR-283-5p	p<.05	12903.7
1060.47	-0.192626	0.133896	-1.43863	0.150257	0.344284	dme-mir-284,dme-miR-284-3p	miR-284-3p	no	1126.17
24634.3	-0.894624	0.133805	-6.68604	2.29e-11	1.99e-09	dme-mir-284,dme-miR-284-5p	miR-284-5p	p<.05	25278.9
1890.6	-0.123042	0.150234	-0.819001	0.412786	0.642057	dme-mir-285,dme-miR-285-3p	miR-285-3p	no	2040.42
1897.3	1.06091	0.14206	7.46799	8.14e-14	2.13e-11	dme-mir-285,dme-miR-285-5p	miR-285-5p	p<.05 FC>2	2031.25
330.441	0.167666	1.14751	0.146113	0.883832	0.936777	dme-mir-286,dme-miR-286-3p	miR-286-3p	no	343.833
224.234	0.268535	0.306383	0.876469	0.380775	0.609707	dme-mir-2a-1,dme-miR-2a-1-5p	miR-2a-1-5p	no	229.917
8441.67	0.101552	0.157645	0.644182	0.519457	0.711259	dme-mir-2a-1,dme-miR-2a-3p	miR-2a-3p	no	8742.25
8441.67	0.101552	0.157645	0.644182	0.519457	0.711259	dme-mir-2a-1,dme-miR-2a-3p	miR-2a-3p	no	8739.5
193.084	1.04998	0.29308	3.58256	0.00034024	0.00317152	dme-mir-2a-2,dme-miR-2a-2-5p	miR-2a-2-5p	p<.05 FC>2	200.083
8438.71	0.100505	0.157488	0.638179	0.523357	0.711259	dme-mir-2a-2,dme-miR-2a-3p	miR-2a-3p	no	8742.25
8438.71	0.100505	0.157488	0.638179	0.523357	0.711259	dme-mir-2a-2,dme-miR-2a-3p	miR-2a-3p	no	8739.5
55.4129	-0.181932	0.224128	-0.811729	0.416947	0.642057	dme-mir-2b-1,dme-miR-2b-1-5p	miR-2b-1-5p	no	57.5833
7864.64	-0.0235191	0.117078	-0.200885	0.840789	0.923945	dme-mir-2b-1,dme-miR-2b-3p	miR-2b-3p	no	8351
7864.64	-0.0235191	0.117078	-0.200885	0.840789	0.923945	dme-mir-2b-1,dme-miR-2b-3p	miR-2b-3p	no	8321.08
6837.67	0.435519	0.21679	2.00894	0.0445435	0.141779	dme-mir-2b-2,dme-miR-2b-2-5p	miR-2b-2-5p	no	7012.08
7835.64	-0.02301	0.117002	-0.196663	0.844091	0.923945	dme-mir-2b-2,dme-miR-2b-3p	miR-2b-3p	no	8351
7835.64	-0.02301	0.117002	-0.196663	0.844091	0.923945	dme-mir-2b-2,dme-miR-2b-3p	miR-2b-3p	no	8321.08
1165.08	0.46041	0.227313	2.02544	0.042822	0.139707	dme-mir-2c,dme-miR-2c-3p	miR-2c-3p	no	1215.75
482.256	0.353943	0.187941	1.88327	0.0596643	0.181074	dme-mir-2c,dme-miR-2c-5p	miR-2c-5p	no	514.083
57.0062	0.742405	0.555653	1.33609	0.181519	0.39154	dme-mir-3,dme-miR-3-3p	miR-3-3p	no	60.6667
170.664	0.59206	0.163165	3.62861	0.000284955	0.00286051	dme-mir-304,dme-miR-304-3p	miR-304-3p	p<.05	179.333
900.408	-0.28818	0.191872	-1.50194	0.133113	0.315841	dme-mir-304,dme-miR-304-5p	miR-304-5p	no	966
6519.59	0.224513	0.139473	1.60973	0.107457	0.26745	dme-mir-305,dme-miR-305-3p	miR-305-3p	no	6722
53205.5	-0.168346	0.191309	-0.87997	0.378876	0.609707	dme-mir-305,dme-miR-305-5p	miR-305-5p	no	54612.2
10.002	0.644955	0.530551	1.21563	0.224125	0.441441	dme-mir-306,dme-miR-306-3p	miR-306-3p	no	10.9167
2333.37	0.273091	0.19695	1.3866	0.165562	0.372515	dme-mir-306,dme-miR-306-5p	miR-306-5p	no	2416.42
1383.84	0.0717216	0.169745	0.422526	0.672641	0.839997	dme-mir-307a,dme-miR-307a-3p	miR-307a-3p	no	1452.67
26.9059	-0.251452	0.402018	-0.625475	0.53166	0.711606	dme-mir-308,dme-miR-308-3p	miR-308-3p	no	28.25
16.4139	0.178743	0.701305	0.254873	0.798822	0.923014	dme-mir-310,dme-miR-310-3p	miR-310-3p	no	17.3333
23.76	-0.0342375	0.675974	-0.0506491	0.959605	0.983887	dme-mir-311,dme-miR-311-3p	miR-311-3p	no	24.5833
31.9269	0.017834	0.576528	0.0309334	0.975323	0.983887	dme-mir-312,dme-miR-312-3p	miR-312-3p	no	34.6667
9.61334	1.13851	1.12247	1.01429	0.310442	0.557739	dme-mir-314,dme-miR-314-3p	miR-314-3p	FC>2	9.41667
25.4836	0.111199	0.405891	0.273964	0.784113	0.920931	dme-mir-315,dme-miR-315-3p	miR-315-3p	no	26.3333
15711.8	-0.396327	0.0708316	-5.59534	2.2e-08	8.21e-07	dme-mir-315,dme-miR-315-5p	miR-315-5p	p<.05	16540.6
964.382	1.20602	0.729092	1.65414	0.0980988	0.258624	dme-mir-316,dme-miR-316-3p	miR-316-3p	FC>2	797.417
378.951	-0.363085	0.212231	-1.7108	0.0871173	0.239343	dme-mir-316,dme-miR-316-5p	miR-316-5p	no	397.5
35546.3	-0.0313629	0.173019	-0.181269	0.856157	0.923945	dme-mir-317,dme-miR-317-3p	miR-317-3p	no	37056.2
19410.7	0.564997	0.2289	2.46831	0.0135752	0.059052	dme-mir-317,dme-miR-317-5p	miR-317-5p	no	19650.2
144.818	0.48427	0.400648	1.20872	0.226771	0.441441	dme-mir-318,dme-miR-318-3p	miR-318-3p	no	148.417
217.171	0.626091	0.181415	3.45115	0.000558206	0.00455287	dme-mir-31a,dme-miR-31a-3p	miR-31a-3p	p<.05	224.583
31487.5	0.0172714	0.137631	0.125491	0.900135	0.939741	dme-mir-31a,dme-miR-31a-5p	miR-31a-5p	no	33438.9
242.528	-0.0267369	0.157539	-0.169716	0.865233	0.925516	dme-mir-31b,dme-miR-31b-5p	miR-31b-5p	no	254.917
245.969	0.0332703	0.179971	0.184865	0.853335	0.923945	dme-mir-33,dme-miR-33-3p	miR-33-3p	no	245.667
47967.2	-0.461952	0.104156	-4.43519	9.2e-06	0.000160063	dme-mir-33,dme-miR-33-5p	miR-33-5p	p<.05	48647.4
39259.4	0.938284	0.240501	3.90137	9.56e-05	0.00131392	dme-mir-34,dme-miR-34-3p	miR-34-3p	p<.05	41349.3
345094	0.654176	0.13086	4.99905	5.76e-07	1.88e-05	dme-mir-34,dme-miR-34-5p	miR-34-5p	p<.05	359728
10.0535	0.0647131	0.504695	0.128222	0.897973	0.939741	dme-mir-3642,dme-miR-3642-3p	miR-3642-3p	no	10.8333
8.6667	-0.933392	0.542302	-1.72117	0.0852208	0.239168	dme-mir-3645,dme-miR-3645-5p	miR-3645-5p	no	9.25
601.813	-0.0274667	0.142616	-0.192592	0.847278	0.923945	dme-mir-375,dme-miR-375-3p	miR-375-3p	no	623.75
55.1949	0.572898	0.234432	2.44377	0.0145348	0.0602574	dme-mir-375,dme-miR-375-5p	miR-375-5p	no	60.25
99.1527	0.393954	1.0928	0.360498	0.718475	0.877786	dme-mir-4,dme-miR-4-3p	miR-4-3p	no	103.5
7.55696	-1.90407	0.706522	-2.69499	0.00703912	0.0357174	dme-mir-4916,dme-miR-4916-3p	miR-4916-3p	p<.05 FC>2	7.66667
216.314	-0.873712	0.195922	-4.45948	8.22e-06	0.000153169	dme-mir-4919,dme-miR-4919-3p	miR-4919-3p	p<.05	213.333
9.41005	1.33154	0.531272	2.50633	0.0121993	0.0558601	dme-mir-4940,dme-miR-4940-5p	miR-4940-5p	FC>2	10.3333
5.64641	0.32771	0.663467	0.493935	0.621352	0.794965	dme-mir-4943,dme-miR-4943-3p	miR-4943-3p	no	6.5
8.82673	0.351626	0.518373	0.678325	0.497566	0.690769	dme-mir-4949,dme-miR-4949-3p	miR-4949-3p	no	9.58333
12.7384	-0.0138787	0.454995	-0.030503	0.975666	0.983887	dme-mir-4949,dme-miR-4949-5p	miR-4949-5p	no	13.25
13.0401	0.627001	0.462371	1.35606	0.175081	0.384001	dme-mir-4951,dme-miR-4951-3p	miR-4951-3p	no	13.8333
266.489	0.672776	0.189778	3.54506	0.00039252	0.00342638	dme-mir-4951,dme-miR-4951-5p	miR-4951-5p	p<.05	278.583
5.3776	0.307797	0.645986	0.476476	0.633735	0.802936	dme-mir-4952,dme-miR-4952-3p	miR-4952-3p	no	5.66667
47.8683	-0.00224907	0.2598	-0.00865692	0.993093	0.993093	dme-mir-4960,dme-miR-4960-3p	miR-4960-3p	no	49.5
16.052	0.158707	0.415173	0.382268	0.702263	0.868676	dme-mir-4961,dme-miR-4961-5p	miR-4961-5p	no	17.75
41.7927	0.168811	0.512984	0.329077	0.742098	0.893799	dme-mir-4962,dme-miR-4962-3p	miR-4962-3p	no	39.0833
76.6683	-0.0507798	0.530631	-0.0956969	0.923761	0.956753	dme-mir-4962,dme-miR-4962-5p	miR-4962-5p	no	73
14.2027	-1.10256	0.445538	-2.47467	0.0133358	0.0589941	dme-mir-4963,dme-miR-4963-3p	miR-4963-3p	FC>2	14.6667
6.63429	-0.62606	0.637335	-0.982309	0.325947	0.564656	dme-mir-4964,dme-miR-4964-3p	miR-4964-3p	no	6.58333
46.0485	-0.710405	0.322521	-2.20266	0.0276185	0.0974113	dme-mir-4969,dme-miR-4969-5p	miR-4969-5p	no	50.9167
9.28881	-0.802916	0.666504	-1.20467	0.228331	0.441441	dme-mir-4973,dme-miR-4973-5p	miR-4973-5p	no	10.5
45.0152	-0.69602	0.338042	-2.05897	0.0394968	0.13049	dme-mir-4975,dme-miR-4975-5p	miR-4975-5p	no	48.25
23.51	-1.23902	0.545744	-2.27034	0.0231873	0.0877083	dme-mir-4976,dme-miR-4976-5p	miR-4976-5p	FC>2	21.25
38.9448	-0.348921	0.296265	-1.17774	0.238902	0.458481	dme-mir-4984,dme-miR-4984-3p	miR-4984-3p	no	42.0833
6.05485	1.0897	0.686812	1.5866	0.112602	0.274666	dme-mir-4985,dme-miR-4985-5p	miR-4985-5p	FC>2	7
7.09989	0.645273	0.654608	0.985739	0.324261	0.564656	dme-mir-5,dme-miR-5-3p	miR-5-3p	no	7.41667
326.615	-0.0788814	0.81781	-0.0964543	0.92316	0.956753	dme-mir-5,dme-miR-5-5p	miR-5-5p	no	334.417
780.273	0.460738	0.730862	0.630403	0.528431	0.711259	dme-mir-6-1,dme-miR-6-3p	miR-6-3p	no	804.917
780.273	0.460738	0.730862	0.630403	0.528431	0.711259	dme-mir-6-1,dme-miR-6-3p	miR-6-3p	no	805
780.273	0.460738	0.730862	0.630403	0.528431	0.711259	dme-mir-6-2,dme-miR-6-3p	miR-6-3p	no	804.917
780.273	0.460738	0.730862	0.630403	0.528431	0.711259	dme-mir-6-2,dme-miR-6-3p	miR-6-3p	no	805
780.328	0.460397	0.730754	0.63003	0.528675	0.711259	dme-mir-6-3,dme-miR-6-3p	miR-6-3p	no	804.917
780.328	0.460397	0.730754	0.63003	0.528675	0.711259	dme-mir-6-3,dme-miR-6-3p	miR-6-3p	no	805
74.4986	0.0102156	0.277563	0.0368047	0.970641	0.983887	dme-mir-7,dme-miR-7-3p	miR-7-3p	no	82.8333
223255	-0.301459	0.184984	-1.62965	0.103176	0.266623	dme-mir-7,dme-miR-7-5p	miR-7-5p	no	236996
151.052	-0.289534	0.211955	-1.36602	0.171933	0.380294	dme-mir-79,dme-miR-79-3p	miR-79-3p	no	157.667
78.4487	0.350651	0.274616	1.27688	0.201645	0.418106	dme-mir-79,dme-miR-79-5p	miR-79-5p	no	79.25
843572	-0.568116	0.160971	-3.52931	0.000416641	0.00350785	dme-mir-8,dme-miR-8-3p	miR-8-3p	p<.05	907254
201906	0.529243	0.316226	1.67362	0.0942054	0.252127	dme-mir-8,dme-miR-8-5p	miR-8-5p	no	199850
672.23	0.286837	0.292445	0.980826	0.326679	0.564656	dme-mir-87,dme-miR-87-3p	miR-87-3p	no	749.583
141.291	1.35016	0.229417	5.88519	3.98e-09	2.08e-07	dme-mir-87,dme-miR-87-5p	miR-87-5p	p<.05 FC>2	153.083
3668.18	0.0887368	0.094691	0.93712	0.348697	0.579681	dme-mir-927,dme-miR-927-3p	miR-927-3p	no	3930.92
61184.6	-0.393861	0.128193	-3.0724	0.00212342	0.014495	dme-mir-927,dme-miR-927-5p	miR-927-5p	p<.05	63506.8
1663	-0.146722	0.201442	-0.728362	0.466392	0.672532	dme-mir-929,dme-miR-929-3p	miR-929-3p	no	1733.42
2162.71	-0.189312	0.137783	-1.37399	0.169444	0.377991	dme-mir-929,dme-miR-929-5p	miR-929-5p	no	2284
85.7702	0.317308	0.244631	1.29709	0.1946	0.409601	dme-mir-92a,dme-miR-92a-3p	miR-92a-3p	no	89.5833
43.7196	-0.322257	0.398693	-0.808283	0.418928	0.642057	dme-mir-92a,dme-miR-92a-5p	miR-92a-5p	no	47.8333
1071	-0.617262	0.16692	-3.69795	0.000217348	0.00226911	dme-mir-92b,dme-miR-92b-3p	miR-92b-3p	p<.05	1075
1838.21	0.0994433	0.139873	0.710956	0.477112	0.680471	dme-mir-932,dme-miR-932-3p	miR-932-3p	no	1924.75
15607.9	-0.0962534	0.140014	-0.687455	0.491796	0.690082	dme-mir-932,dme-miR-932-5p	miR-932-5p	no	16055.6
24.5608	-0.138174	0.346857	-0.398359	0.690365	0.858026	dme-mir-9369,dme-miR-9369-3p	miR-9369-3p	no	26.75
22.6244	1.49554	0.356907	4.19028	2.79e-05	0.000403985	dme-mir-9370,dme-miR-9370-5p	miR-9370-5p	p<.05 FC>2	24.9167
16.4159	1.4552	0.428967	3.39234	0.000692983	0.00548086	dme-mir-9371,dme-miR-9371-5p	miR-9371-5p	p<.05 FC>2	18.5833
25.9322	3.16492	0.523718	6.04317	1.51e-09	9.86e-08	dme-mir-9372,dme-miR-9372-3p	miR-9372-3p	p<.05 FC>2	30
8.51798	1.36123	0.505777	2.69136	0.00711611	0.0357174	dme-mir-9373,dme-miR-9373-3p	miR-9373-3p	p<.05 FC>2	9.08333
10.1389	0.391303	0.659444	0.593384	0.552924	0.725192	dme-mir-9375,dme-miR-9375-3p	miR-9375-3p	no	11.25
10.8596	-1.37648	0.559449	-2.46043	0.0138772	0.0593763	dme-mir-9378,dme-miR-9378-5p	miR-9378-5p	FC>2	11.25
13.8122	-0.59654	0.556483	-1.07198	0.283728	0.521499	dme-mir-9381,dme-miR-9381-3p	miR-9381-3p	no	13.25
6.35286	1.07814	0.657855	1.63888	0.101239	0.264233	dme-mir-9382,dme-miR-9382-3p	miR-9382-3p	FC>2	6.41667
31.3934	-0.382184	0.427623	-0.893742	0.37146	0.605944	dme-mir-9383,dme-miR-9383-3p	miR-9383-3p	no	30.1667
101.398	0.186956	0.238926	0.782486	0.433929	0.652933	dme-mir-954,dme-miR-954-3p	miR-954-3p	no	112.833
250.927	0.591257	0.233906	2.52776	0.0114793	0.0544744	dme-mir-954,dme-miR-954-5p	miR-954-5p	no	272.417
5.95678	0.914226	0.72714	1.25729	0.208648	0.424242	dme-mir-955,dme-miR-955-3p	miR-955-3p	no	6.75
100.757	0.299741	0.238944	1.25444	0.209683	0.424242	dme-mir-955,dme-miR-955-5p	miR-955-5p	no	110.083
461.541	0.348487	1.30504	0.267032	0.789444	0.920931	dme-mir-956,dme-miR-956-3p	miR-956-3p	no	462.75
66053.8	-0.672091	0.174358	-3.85467	0.000115887	0.00151232	dme-mir-957,dme-miR-957-3p	miR-957-3p	p<.05	71480.8
217.276	-0.0656033	0.135181	-0.4853	0.627463	0.798868	dme-mir-957,dme-miR-957-5p	miR-957-5p	no	230.667
9.21849	0.204136	0.62289	0.327724	0.74312	0.893799	dme-mir-960,dme-miR-960-3p	miR-960-3p	no	9
5.15879	-0.628056	0.779922	-0.80528	0.420658	0.642057	dme-mir-960,dme-miR-960-5p	miR-960-5p	no	5.66667
9.28436	-0.528769	0.609548	-0.867476	0.385681	0.610078	dme-mir-961,dme-miR-961-5p	miR-961-5p	no	9.5
7.02003	0.553253	0.729024	0.758895	0.447915	0.653106	dme-mir-962,dme-miR-962-5p	miR-962-5p	no	6.33333
11.5122	-0.0180961	0.610358	-0.0296483	0.976348	0.983887	dme-mir-963,dme-miR-963-3p	miR-963-3p	no	12.3333
32.008	-0.290704	0.377305	-0.770476	0.441018	0.652933	dme-mir-964,dme-miR-964-5p	miR-964-5p	no	33.25
20.6221	-0.067481	0.383222	-0.176088	0.860224	0.923945	dme-mir-965,dme-miR-965-3p	miR-965-3p	no	21.6667
3436.35	-0.0828371	0.139333	-0.594526	0.55216	0.725192	dme-mir-965,dme-miR-965-5p	miR-965-5p	no	3753.58
28.9895	0.381033	0.378536	1.0066	0.314129	0.557739	dme-mir-966,dme-miR-966-5p	miR-966-5p	no	30.5833
27.3379	-0.27832	0.388109	-0.717117	0.473302	0.678746	dme-mir-967,dme-miR-967-3p	miR-967-3p	no	27.6667
47.1466	-0.35573	0.253088	-1.40556	0.159855	0.362801	dme-mir-967,dme-miR-967-5p	miR-967-5p	no	50.8333
543.736	0.841762	0.33802	2.49027	0.0127646	0.0574407	dme-mir-969,dme-miR-969-3p	miR-969-3p	no	552.083
56.3338	-0.528478	0.265063	-1.99378	0.0461762	0.145205	dme-mir-969,dme-miR-969-5p	miR-969-5p	no	60.9167
10484.9	-0.34282	0.111139	-3.0846	0.00203828	0.0143781	dme-mir-970,dme-miR-970-3p	miR-970-3p	p<.05	11124.2
928.026	-0.0208738	0.164785	-0.126672	0.8992	0.939741	dme-mir-970,dme-miR-970-5p	miR-970-5p	no	985.25
51.3732	-0.0801828	0.340141	-0.235734	0.813639	0.923945	dme-mir-971,dme-miR-971-3p	miR-971-3p	no	55.1667
8.61267	-0.00526642	0.517653	-0.0101737	0.991883	0.993093	dme-mir-971,dme-miR-971-5p	miR-971-5p	no	9.66667
7.2716	-0.111629	0.556322	-0.200655	0.840969	0.923945	dme-mir-973,dme-miR-973-3p	miR-973-3p	no	7.25
8.72521	-0.712446	0.562869	-1.26574	0.205605	0.422543	dme-mir-974,dme-miR-974-5p	miR-974-5p	no	9.91667
9.88135	-0.246253	0.548386	-0.44905	0.653395	0.819886	dme-mir-975,dme-miR-975-5p	miR-975-5p	no	10.5
6.05933	-0.324302	0.718795	-0.451174	0.651864	0.819886	dme-mir-976,dme-miR-976-3p	miR-976-3p	no	6.41667
6.08394	-0.909101	0.754568	-1.2048	0.228282	0.441441	dme-mir-979,dme-miR-979-3p	miR-979-3p	no	6.33333
35.1563	-0.107355	0.403865	-0.26582	0.790378	0.920931	dme-mir-980,dme-miR-980-3p	miR-980-3p	no	36.25
390.852	-0.163708	0.159937	-1.02358	0.306035	0.557318	dme-mir-980,dme-miR-980-5p	miR-980-5p	no	416.333
5473.29	-0.275497	0.171212	-1.6091	0.107595	0.26745	dme-mir-981,dme-miR-981-3p	miR-981-3p	no	5870.58
57.9266	0.280476	0.23172	1.21041	0.226122	0.441441	dme-mir-981,dme-miR-981-5p	miR-981-5p	no	63.25
53.7605	0.0967125	0.294011	0.328942	0.742199	0.893799	dme-mir-982,dme-miR-982-5p	miR-982-5p	no	58.6667
6.94925	0.11721	0.615104	0.190552	0.848876	0.923945	dme-mir-983-1,dme-miR-983-3p	miR-983-3p	no	7.41667
138.683	-0.161817	0.211263	-0.765948	0.443707	0.652933	dme-mir-983-1,dme-miR-983-5p	miR-983-5p	no	149
6.94925	0.11721	0.615104	0.190552	0.848876	0.923945	dme-mir-983-2,dme-miR-983-3p	miR-983-3p	no	7.41667
138.683	-0.161817	0.211263	-0.765948	0.443707	0.652933	dme-mir-983-2,dme-miR-983-5p	miR-983-5p	no	149
32.0718	-0.379143	0.371522	-1.02051	0.307486	0.557318	dme-mir-984,dme-miR-984-5p	miR-984-5p	no	34.6667
38.843	-0.192279	0.321712	-0.597675	0.550057	0.725192	dme-mir-986,dme-miR-986-3p	miR-986-3p	no	41.1667
42.8769	-0.285963	0.255198	-1.12055	0.262478	0.489334	dme-mir-986,dme-miR-986-5p	miR-986-5p	no	46.4167
917.216	-0.293864	0.131494	-2.23481	0.0254299	0.0940179	dme-mir-987,dme-miR-987-3p	miR-987-3p	no	994.5
34323.4	-0.578535	0.192753	-3.00144	0.00268708	0.0171056	dme-mir-987,dme-miR-987-5p	miR-987-5p	p<.05	37379.2
7804.45	0.0224472	0.125779	0.178466	0.858357	0.923945	dme-mir-988,dme-miR-988-3p	miR-988-3p	no	8020
1196.07	-0.0913341	0.131841	-0.692759	0.488461	0.689125	dme-mir-988,dme-miR-988-5p	miR-988-5p	no	1283.17
3259.41	-0.632628	0.131354	-4.81619	1.46e-06	3.47e-05	dme-mir-990,dme-miR-990-5p	miR-990-5p	p<.05	3458
7869.1	-0.228354	0.145816	-1.56604	0.117338	0.283568	dme-mir-993,dme-miR-993-3p	miR-993-3p	no	8242
524.92	0.136999	0.275308	0.497621	0.618751	0.794965	dme-mir-993,dme-miR-993-5p	miR-993-5p	no	536.083
59.4169	0.866042	0.496471	1.7444	0.0810897	0.230048	dme-mir-994,dme-miR-994-5p	miR-994-5p	no	59.9167
921.757	-0.051367	0.250566	-0.205004	0.837569	0.923945	dme-mir-995,dme-miR-995-3p	miR-995-3p	no	960.25
1025.85	0.269474	0.166531	1.61816	0.105628	0.26745	dme-mir-995,dme-miR-995-5p	miR-995-5p	no	1075.5
578.806	0.34601	0.162905	2.124	0.0336699	0.113199	dme-mir-996,dme-miR-996-3p	miR-996-3p	no	606
2150.45	0.643629	0.112032	5.74506	9.19e-09	4e-07	dme-mir-996,dme-miR-996-5p	miR-996-5p	p<.05	2319.08
6144.38	0.202916	0.110924	1.82932	0.0673522	0.19976	dme-mir-998,dme-miR-998-3p	miR-998-3p	no	6469.33
163.489	0.359721	0.178135	2.01937	0.0434483	0.14	dme-mir-998,dme-miR-998-5p	miR-998-5p	no	179.167
345872	-0.602987	0.170134	-3.54418	0.000393836	0.00342638	dme-mir-999,dme-miR-999-3p	miR-999-3p	p<.05	368170
202.788	-0.468776	0.209969	-2.23259	0.0255757	0.0940179	dme-mir-999,dme-miR-999-5p	miR-999-5p	no	222.417
516.63	0.15327	0.184751	0.829602	0.406764	0.63955	dme-mir-9a,dme-miR-9a-3p	miR-9a-3p	no	553.25
89970.8	0.290529	0.161329	1.80085	0.0717266	0.208007	dme-mir-9a,dme-miR-9a-5p	miR-9a-5p	no	94010.9
728.859	0.341691	0.12562	2.72003	0.00652763	0.0347696	dme-mir-9b,dme-miR-9b-3p	miR-9b-3p	p<.05	778.833
22741	0.0411756	0.149934	0.274625	0.783605	0.920931	dme-mir-9b,dme-miR-9b-5p	miR-9b-5p	no	23948.4
14.8329	0.404892	0.410027	0.987476	0.323409	0.564656	dme-mir-9c,dme-miR-9c-3p	miR-9c-3p	no	15.5833
45490.6	0.137201	0.179751	0.763282	0.445295	0.652933	dme-mir-9c,dme-miR-9c-5p	miR-9c-5p	no	48007.8
6.81632	-0.0303184	0.68172	-0.0444734	0.964527	0.983887	dme-mir-iab-4,dme-miR-iab-4-5p	miR-iab-4-5p	no	7.08333
8.27225	0.498876	2.3843	0.209234	0.834266	0.923945	dme-mir-958,dme-miR-958-3p	miR-958-3p	no	8.25
6.65089	1.00226	1.76399	0.568176	0.569916	0.74374	dme-mir-958,dme-miR-958-5p	miR-958-5p	FC>2	7.83333

## Sheet: DeSeq2_29vs25
baseMean	log2FoldChange	lfcSE	stat	pvalue	padj	name	lfc	names	express
635362	-0.211171	0.107861	-1.95781	0.0502523	0.233962	dme-bantam,dme-bantam-3p	no	bantam-3p	674985
19158.1	-0.357021	0.154192	-2.31543	0.0205893	0.127117	dme-bantam,dme-bantam-5p	no	bantam-5p	20924.5
2323.36	-0.0905825	0.130245	-0.695478	0.486756	0.796258	dme-let-7,dme-let-7-3p	no	let-7-3p	2435.33
140515	0.075178	0.223428	0.336476	0.736512	0.905495	dme-let-7,dme-let-7-5p	no	let-7-5p	151070
394126	-0.114108	0.33652	-0.339082	0.734548	0.905495	dme-mir-1,dme-miR-1-3p	no	miR-1-3p	423070
68922.2	-0.0867831	0.168368	-0.515437	0.606248	0.836072	dme-mir-10,dme-miR-10-3p	no	miR-10-3p	73802.1
26390.9	0.106738	0.113767	0.938212	0.348135	0.739408	dme-mir-10,dme-miR-10-5p	no	miR-10-5p	27509.9
100.6	0.143953	0.226378	0.635895	0.524845	0.797091	dme-mir-100,dme-miR-100-3p	no	miR-100-3p	107.583
58564.5	0.24896	0.118045	2.10903	0.0349417	0.17538	dme-mir-100,dme-miR-100-5p	no	miR-100-5p	61841.6
404.896	-0.514576	0.147691	-3.48414	0.000493728	0.00737993	dme-mir-1000,dme-miR-1000-3p	p<.05	miR-1000-3p	437.25
2358.59	0.45219	0.150517	3.00425	0.00266236	0.0260728	dme-mir-1000,dme-miR-1000-5p	p<.05	miR-1000-5p	2438.92
56.735	-0.642549	0.282068	-2.27799	0.0227269	0.131529	dme-mir-1001,dme-miR-1001-3p	no	miR-1001-3p	60
589.117	-0.736098	0.175282	-4.19952	2.67485e-05	0.000690597	dme-mir-1001,dme-miR-1001-5p	p<.05	miR-1001-5p	631.917
526.967	0.176495	0.273424	0.6455	0.518603	0.796258	dme-mir-1003,dme-miR-1003-3p	no	miR-1003-3p	578.75
37.4773	-0.0795075	0.33314	-0.238661	0.811369	0.940011	dme-mir-1003,dme-miR-1003-5p	no	miR-1003-5p	40.75
1365.83	0.0891723	0.212551	0.419534	0.674826	0.883182	dme-mir-1004,dme-miR-1004-3p	no	miR-1004-3p	1410.5
1485.01	-0.0500151	0.129552	-0.386063	0.69945	0.886803	dme-mir-1004,dme-miR-1004-5p	no	miR-1004-5p	1576.83
947.126	-0.228408	0.247825	-0.921652	0.35671	0.739457	dme-mir-1006,dme-miR-1006-3p	no	miR-1006-3p	1026.58
31.2169	1.1392	0.304438	3.74197	0.000182582	0.0037038	dme-mir-1006,dme-miR-1006-5p	p<.05 FC>2	miR-1006-5p	31.8333
25.5369	0.732311	0.320732	2.28325	0.0224158	0.131529	dme-mir-1007,dme-miR-1007-3p	no	miR-1007-3p	26.5
504.312	-0.329463	0.222124	-1.48324	0.13801	0.450517	dme-mir-1008,dme-miR-1008-5p	no	miR-1008-5p	554.417
154.358	-0.592864	0.306665	-1.93326	0.0532041	0.243709	dme-mir-1009,dme-miR-1009-3p	no	miR-1009-3p	170.667
24358.2	-0.0800228	0.0998721	-0.801253	0.422985	0.785149	dme-mir-1010,dme-miR-1010-3p	no	miR-1010-3p	25790.1
367.364	-0.652411	0.195807	-3.33191	0.000862519	0.00995744	dme-mir-1010,dme-miR-1010-5p	p<.05	miR-1010-5p	403.167
9.32512	0.449275	0.527652	0.851461	0.394513	0.757039	dme-mir-1011,dme-miR-1011-3p	no	miR-1011-3p	9.75
308.426	-0.39883	0.20286	-1.96603	0.0492948	0.233962	dme-mir-1012,dme-miR-1012-3p	no	miR-1012-3p	338.917
1904.04	-0.385972	0.231198	-1.66945	0.0950291	0.32516	dme-mir-1012,dme-miR-1012-5p	no	miR-1012-5p	2071.33
1191.42	-0.724623	0.11822	-6.12945	8.81848e-10	6.26112e-08	dme-mir-1013,dme-miR-1013-3p	p<.05	miR-1013-3p	1300.75
16.0478	1.46435	0.498905	2.93514	0.00333399	0.0311153	dme-mir-1015,dme-miR-1015-3p	p<.05 FC>2	miR-1015-3p	14.8333
253.29	0.0927544	0.139889	0.663056	0.507294	0.796258	dme-mir-1016,dme-miR-1016-3p	no	miR-1016-3p	268
40.2222	0.205119	0.35586	0.576402	0.564343	0.830433	dme-mir-1016,dme-miR-1016-5p	no	miR-1016-5p	39.5833
4158.82	0.313349	0.125403	2.49873	0.0124638	0.0884928	dme-mir-1017,dme-miR-1017-3p	no	miR-1017-3p	4377.42
180366	-0.0569055	0.129591	-0.439116	0.660578	0.868537	dme-mir-11,dme-miR-11-3p	no	miR-11-3p	186987
7892.33	-0.00318234	0.160778	-0.0197933	0.984208	0.988456	dme-mir-11,dme-miR-11-5p	no	miR-11-5p	8159.83
9.60846	-0.469033	0.534878	-0.876897	0.380543	0.750514	dme-mir-12,dme-miR-12-3p	no	miR-12-3p	10.8333
997.845	0.303063	0.143901	2.10606	0.0351995	0.17538	dme-mir-12,dme-miR-12-5p	no	miR-12-5p	1061.5
149.631	-0.656497	0.293449	-2.23718	0.0252747	0.135434	dme-mir-124,dme-miR-124-3p	no	miR-124-3p	158.333
884.522	-0.475828	0.12901	-3.6883	0.000225755	0.00423186	dme-mir-124,dme-miR-124-5p	p<.05	miR-124-5p	956.083
4738.94	-0.032378	0.172292	-0.187925	0.850935	0.951628	dme-mir-125,dme-miR-125-3p	no	miR-125-3p	4886.42
53655.2	0.193743	0.0861535	2.24881	0.0245243	0.133941	dme-mir-125,dme-miR-125-5p	no	miR-125-5p	56242.6
16687.7	0.215485	0.161753	1.33219	0.182798	0.514008	dme-mir-133,dme-miR-133-3p	no	miR-133-3p	17284.7
1500.17	-0.466195	0.128639	-3.62406	0.000290018	0.00484501	dme-mir-133,dme-miR-133-5p	p<.05	miR-133-5p	1620.33
3403.68	-0.562818	0.170063	-3.30947	0.000934712	0.0101205	dme-mir-137,dme-miR-137-3p	p<.05	miR-137-3p	3753.75
162.266	0.0327061	0.178295	0.183438	0.854455	0.951628	dme-mir-137,dme-miR-137-5p	no	miR-137-5p	174.5
780.897	0.175481	0.138144	1.27028	0.203985	0.531483	dme-mir-13a,dme-miR-13a-3p	no	miR-13a-3p	825.083
127.417	-0.246171	0.297185	-0.828345	0.407475	0.76707	dme-mir-13a,dme-miR-13a-5p	no	miR-13a-5p	130.5
388.715	-0.0603922	0.121835	-0.495687	0.620115	0.843208	dme-mir-13b-1,dme-miR-13b-1-5p	no	miR-13b-1-5p	409.667
16277.6	0.278437	0.0808586	3.4435	0.000574229	0.00741277	dme-mir-13b-1,dme-miR-13b-3p	p<.05	miR-13b-3p	16977.5
249.322	0.447634	0.174975	2.55827	0.0105193	0.0789532	dme-mir-13b-2,dme-miR-13b-2-5p	no	miR-13b-2-5p	258.25
16277.6	0.278437	0.0808586	3.4435	0.000574229	0.00741277	dme-mir-13b-2,dme-miR-13b-3p	p<.05	miR-13b-3p	16977.5
2.01911e+06	0.068404	0.0970537	0.704806	0.480931	0.796258	dme-mir-14,dme-miR-14-3p	no	miR-14-3p	2.11594e+06
55419.4	-0.195532	0.219545	-0.890623	0.373131	0.750514	dme-mir-14,dme-miR-14-5p	no	miR-14-5p	58302.7
558185	0.0157207	0.180417	0.0871352	0.930564	0.98612	dme-mir-184,dme-miR-184-3p	no	miR-184-3p	589518
2501.03	-0.0716171	0.233072	-0.307274	0.758635	0.919325	dme-mir-184,dme-miR-184-5p	no	miR-184-5p	2571.92
158.688	-0.118132	0.259265	-0.455641	0.648648	0.858042	dme-mir-190,dme-miR-190-3p	no	miR-190-3p	173.25
7846.68	0.332322	0.226413	1.46777	0.142168	0.458814	dme-mir-190,dme-miR-190-5p	no	miR-190-5p	8323
269.923	-0.152062	0.142483	-1.06723	0.285869	0.660056	dme-mir-193,dme-miR-193-3p	no	miR-193-3p	286.833
10760.4	-0.0118712	0.129031	-0.0920034	0.926695	0.985698	dme-mir-193,dme-miR-193-5p	no	miR-193-5p	11459.9
19372.2	0.059421	0.20364	0.291794	0.770444	0.919354	dme-mir-210,dme-miR-210-3p	no	miR-210-3p	20094.9
10759.5	-0.482953	0.311858	-1.54863	0.12147	0.401133	dme-mir-210,dme-miR-210-5p	no	miR-210-5p	11033.9
1816.3	-0.846408	0.144862	-5.84287	5.13092e-09	2.91437e-07	dme-mir-219,dme-miR-219-3p	p<.05	miR-219-3p	1984.67
566.838	-0.00686439	0.226305	-0.0303324	0.975802	0.988456	dme-mir-219,dme-miR-219-5p	no	miR-219-5p	584.333
138.783	0.564574	0.230451	2.44986	0.0142911	0.0989918	dme-mir-2279,dme-miR-2279-5p	no	miR-2279-5p	146.25
4.23568	-0.831325	0.756457	-1.09897	0.27178	0.649192	dme-mir-2282,dme-miR-2282-3p	no	miR-2282-3p	5
3.09245	0.659364	0.98902	0.666684	0.504974	0.796258	dme-mir-2283,dme-miR-2283-3p	no	miR-2283-3p	3.25
14.7975	-0.670188	0.522498	-1.28266	0.199611	0.526092	dme-mir-2489,dme-miR-2489-3p	no	miR-2489-3p	16
10.8592	-0.37635	0.55752	-0.675044	0.499648	0.796258	dme-mir-2493,dme-miR-2493-3p	no	miR-2493-3p	11.8333
51.7095	0.445966	0.325485	1.37016	0.170637	0.510116	dme-mir-2500,dme-miR-2500-3p	no	miR-2500-3p	54.25
3.24707	0.39522	0.869851	0.454354	0.649574	0.858042	dme-mir-2500,dme-miR-2500-5p	no	miR-2500-5p	3.66667
2.46961	0.373535	1.00822	0.370489	0.711019	0.897463	dme-mir-2501,dme-miR-2501-5p	no	miR-2501-5p	2.58333
445.16	0.113952	0.23016	0.495099	0.62053	0.843208	dme-mir-252,dme-miR-252-3p	no	miR-252-3p	455.417
54000.5	0.0914815	0.132452	0.690676	0.489769	0.796258	dme-mir-252,dme-miR-252-5p	no	miR-252-5p	56671.7
2381.04	0.484748	0.168459	2.87755	0.00400771	0.0355685	dme-mir-2535b,dme-miR-2535b-3p	p<.05	miR-2535b-3p	2510.08
252.104	-0.476328	0.203186	-2.3443	0.0190629	0.120308	dme-mir-263a,dme-miR-263a-3p	no	miR-263a-3p	270.667
58269.2	0.165923	0.161389	1.02809	0.303908	0.694588	dme-mir-263a,dme-miR-263a-5p	no	miR-263a-5p	61316.8
60.2182	0.119616	0.227251	0.526359	0.598639	0.836072	dme-mir-263b,dme-miR-263b-3p	no	miR-263b-3p	62.5
14787.8	0.199095	0.164765	1.20836	0.22691	0.575047	dme-mir-263b,dme-miR-263b-5p	no	miR-263b-5p	15075.5
13.0817	0.316457	0.558826	0.566288	0.571198	0.831898	dme-mir-274,dme-miR-274-3p	no	miR-274-3p	13.0833
13326.5	0.249868	0.14754	1.69356	0.0903493	0.32074	dme-mir-274,dme-miR-274-5p	no	miR-274-5p	14197.8
26412.8	0.188851	0.13275	1.42261	0.15485	0.476656	dme-mir-275,dme-miR-275-3p	no	miR-275-3p	27416.6
4057.47	0.233181	0.180437	1.29231	0.19625	0.525802	dme-mir-275,dme-miR-275-5p	no	miR-275-5p	4118.42
2.79588e+06	0.178009	0.146139	1.21808	0.223192	0.57105	dme-mir-276a,dme-miR-276a-3p	no	miR-276a-3p	2.89449e+06
1672.26	0.252037	0.192206	1.31128	0.189762	0.523226	dme-mir-276a,dme-miR-276a-5p	no	miR-276a-5p	1701.5
376364	0.065854	0.143135	0.460082	0.645457	0.858042	dme-mir-276b,dme-miR-276b-3p	no	miR-276b-3p	390555
1672.26	0.252037	0.192206	1.31128	0.189762	0.523226	dme-mir-276b,dme-miR-276b-5p	no	miR-276b-5p	1701.5
251911	0.0989806	0.125726	0.787271	0.431123	0.795058	dme-mir-277,dme-miR-277-3p	no	miR-277-3p	259829
8444.38	-0.7612	0.197795	-3.84842	0.000118882	0.00281353	dme-mir-277,dme-miR-277-5p	p<.05	miR-277-5p	9150.42
27227.1	0.254489	0.13922	1.82796	0.0675552	0.282142	dme-mir-278,dme-miR-278-3p	no	miR-278-3p	27877.4
6601.41	-0.445118	0.127543	-3.48996	0.000483102	0.00737993	dme-mir-278,dme-miR-278-5p	p<.05	miR-278-5p	7048.17
21367	-0.0484156	0.152982	-0.316479	0.751639	0.919325	dme-mir-279,dme-miR-279-3p	no	miR-279-3p	22856.8
19.4319	-0.310547	0.435243	-0.713501	0.475536	0.796258	dme-mir-279,dme-miR-279-5p	no	miR-279-5p	22
17.2748	-0.771311	0.432504	-1.78336	0.0745275	0.29397	dme-mir-281-1,dme-miR-281-1-5p	no	miR-281-1-5p	19.25
6369.25	-0.222156	0.15663	-1.41835	0.156088	0.476656	dme-mir-281-1,dme-miR-281-3p	no	miR-281-3p	6824.5
6369.25	-0.222156	0.15663	-1.41835	0.156088	0.476656	dme-mir-281-1,dme-miR-281-3p	no	miR-281-3p	6828.5
3286.12	-0.362347	0.134965	-2.68475	0.00725838	0.0588965	dme-mir-281-2,dme-miR-281-2-5p	no	miR-281-2-5p	3544.42
6373.1	-0.223119	0.156671	-1.42413	0.154409	0.476656	dme-mir-281-2,dme-miR-281-3p	no	miR-281-3p	6824.5
6373.1	-0.223119	0.156671	-1.42413	0.154409	0.476656	dme-mir-281-2,dme-miR-281-3p	no	miR-281-3p	6828.5
20.7081	-0.315708	0.424062	-0.744487	0.456582	0.796258	dme-mir-282,dme-miR-282-3p	no	miR-282-3p	22.4167
21.348	0.137765	0.335141	0.411065	0.681025	0.886803	dme-mir-282,dme-miR-282-5p	no	miR-282-5p	22.0833
100.054	-0.369509	0.206351	-1.79069	0.0733439	0.29397	dme-mir-283,dme-miR-283-3p	no	miR-283-3p	109.083
12237.4	0.0817982	0.135428	0.603996	0.545846	0.819511	dme-mir-283,dme-miR-283-5p	no	miR-283-5p	12903.7
1060.47	0.0133742	0.134387	0.0995198	0.920726	0.98303	dme-mir-284,dme-miR-284-3p	no	miR-284-3p	1126.17
24634.3	0.564146	0.133739	4.21827	2.46189e-05	0.000690597	dme-mir-284,dme-miR-284-5p	p<.05	miR-284-5p	25278.9
1890.6	0.00393285	0.150546	0.0261239	0.979159	0.988456	dme-mir-285,dme-miR-285-3p	no	miR-285-3p	2040.42
1897.3	-0.668071	0.14413	-4.63522	3.56564e-06	0.000144663	dme-mir-285,dme-miR-285-5p	p<.05	miR-285-5p	2031.25
330.441	0.214464	1.14778	0.186852	0.851777	0.951628	dme-mir-286,dme-miR-286-3p	no	miR-286-3p	343.833
224.234	-0.060514	0.308973	-0.195855	0.844723	0.951628	dme-mir-2a-1,dme-miR-2a-1-5p	no	miR-2a-1-5p	229.917
8441.67	0.115149	0.157728	0.730047	0.465361	0.796258	dme-mir-2a-1,dme-miR-2a-3p	no	miR-2a-3p	8742.25
8441.67	0.115149	0.157728	0.730047	0.465361	0.796258	dme-mir-2a-1,dme-miR-2a-3p	no	miR-2a-3p	8739.5
193.084	-0.390324	0.300809	-1.29758	0.194432	0.525802	dme-mir-2a-2,dme-miR-2a-2-5p	no	miR-2a-2-5p	200.083
8438.71	0.114445	0.157571	0.726307	0.467651	0.796258	dme-mir-2a-2,dme-miR-2a-3p	no	miR-2a-3p	8742.25
8438.71	0.114445	0.157571	0.726307	0.467651	0.796258	dme-mir-2a-2,dme-miR-2a-3p	no	miR-2a-3p	8739.5
55.4129	0.244828	0.224592	1.0901	0.275669	0.65006	dme-mir-2b-1,dme-miR-2b-1-5p	no	miR-2b-1-5p	57.5833
7864.64	-0.0807519	0.117218	-0.688901	0.490886	0.796258	dme-mir-2b-1,dme-miR-2b-3p	no	miR-2b-3p	8351
7864.64	-0.0807519	0.117218	-0.688901	0.490886	0.796258	dme-mir-2b-1,dme-miR-2b-3p	no	miR-2b-3p	8321.08
6837.67	-0.0160329	0.21693	-0.0739081	0.941083	0.988456	dme-mir-2b-2,dme-miR-2b-2-5p	no	miR-2b-2-5p	7012.08
7835.64	-0.0835767	0.117145	-0.713449	0.475568	0.796258	dme-mir-2b-2,dme-miR-2b-3p	no	miR-2b-3p	8351
7835.64	-0.0835767	0.117145	-0.713449	0.475568	0.796258	dme-mir-2b-2,dme-miR-2b-3p	no	miR-2b-3p	8321.08
1165.08	-0.309456	0.228392	-1.35493	0.175439	0.513658	dme-mir-2c,dme-miR-2c-3p	no	miR-2c-3p	1215.75
482.256	-0.927764	0.192844	-4.81096	1.50205e-06	7.10968e-05	dme-mir-2c,dme-miR-2c-5p	p<.05	miR-2c-5p	514.083
57.0062	0.0679876	0.56315	0.120727	0.903907	0.974417	dme-mir-3,dme-miR-3-3p	no	miR-3-3p	60.6667
170.664	0.0137145	0.170359	0.0805038	0.935837	0.988021	dme-mir-304,dme-miR-304-3p	no	miR-304-3p	179.333
900.408	0.132473	0.192024	0.689876	0.490272	0.796258	dme-mir-304,dme-miR-304-5p	no	miR-304-5p	966
6519.59	0.151253	0.139612	1.08338	0.278639	0.65006	dme-mir-305,dme-miR-305-3p	no	miR-305-3p	6722
53205.5	0.0484638	0.191316	0.253318	0.800023	0.93887	dme-mir-305,dme-miR-305-5p	no	miR-305-5p	54612.2
10.002	-0.264108	0.578458	-0.456573	0.647978	0.858042	dme-mir-306,dme-miR-306-3p	no	miR-306-3p	10.9167
2333.37	-0.101676	0.197371	-0.515152	0.606447	0.836072	dme-mir-306,dme-miR-306-5p	no	miR-306-5p	2416.42
1383.84	0.0395866	0.170252	0.232517	0.816136	0.940011	dme-mir-307a,dme-miR-307a-3p	no	miR-307a-3p	1452.67
4.21288	0.618833	0.79752	0.775947	0.43778	0.796258	dme-mir-307a,dme-miR-307a-5p	no	miR-307a-5p	4.25
26.9059	-0.400143	0.41441	-0.965574	0.334257	0.729534	dme-mir-308,dme-miR-308-3p	no	miR-308-3p	28.25
16.4139	0.949053	0.697295	1.36105	0.173498	0.513265	dme-mir-310,dme-miR-310-3p	no	miR-310-3p	17.3333
2.44709	0.843301	1.20878	0.697648	0.485397	0.796258	dme-mir-310,dme-miR-310-5p	no	miR-310-5p	2.58333
23.76	0.229601	0.67923	0.338031	0.73534	0.905495	dme-mir-311,dme-miR-311-3p	no	miR-311-3p	24.5833
3.59992	0.510707	0.894265	0.571092	0.567938	0.831414	dme-mir-311,dme-miR-311-5p	no	miR-311-5p	3.58333
31.9269	0.34389	0.578646	0.594301	0.552311	0.821237	dme-mir-312,dme-miR-312-3p	no	miR-312-3p	34.6667
9.61334	0.993837	1.13321	0.877013	0.38048	0.750514	dme-mir-314,dme-miR-314-3p	no	miR-314-3p	9.41667
25.4836	-0.351453	0.424617	-0.827695	0.407843	0.76707	dme-mir-315,dme-miR-315-3p	no	miR-315-3p	26.3333
15711.8	-0.0373762	0.0708695	-0.527394	0.59792	0.836072	dme-mir-315,dme-miR-315-5p	no	miR-315-5p	16540.6
964.382	1.39015	0.729181	1.90646	0.0565907	0.251121	dme-mir-316,dme-miR-316-3p	FC>2	miR-316-3p	797.417
378.951	0.243787	0.212044	1.1497	0.250268	0.618053	dme-mir-316,dme-miR-316-5p	no	miR-316-5p	397.5
35546.3	-0.0341743	0.173038	-0.197496	0.84344	0.951628	dme-mir-317,dme-miR-317-3p	no	miR-317-3p	37056.2
19410.7	0.0555872	0.228949	0.242793	0.808165	0.940011	dme-mir-317,dme-miR-317-5p	no	miR-317-5p	19650.2
144.818	0.442164	0.402545	1.09842	0.272021	0.649192	dme-mir-318,dme-miR-318-3p	no	miR-318-3p	148.417
217.171	0.247356	0.185622	1.33258	0.182669	0.514008	dme-mir-31a,dme-miR-31a-3p	no	miR-31a-3p	224.583
31487.5	-0.114865	0.137665	-0.834384	0.404064	0.76707	dme-mir-31a,dme-miR-31a-5p	no	miR-31a-5p	33438.9
242.528	-0.0765838	0.160456	-0.47729	0.633156	0.85221	dme-mir-31b,dme-miR-31b-5p	no	miR-31b-5p	254.917
245.969	0.762224	0.179059	4.25683	2.07344e-05	0.000654284	dme-mir-33,dme-miR-33-3p	p<.05	miR-33-3p	245.667
47967.2	0.785928	0.104126	7.54787	4.42427e-14	6.28246e-12	dme-mir-33,dme-miR-33-5p	p<.05	miR-33-5p	48647.4
39259.4	-0.610041	0.240555	-2.53597	0.0112137	0.0816584	dme-mir-34,dme-miR-34-3p	no	miR-34-3p	41349.3
345094	-0.0842322	0.130866	-0.643651	0.519801	0.796258	dme-mir-34,dme-miR-34-5p	no	miR-34-5p	359728
10.0535	-0.264855	0.53409	-0.495899	0.619966	0.843208	dme-mir-3642,dme-miR-3642-3p	no	miR-3642-3p	10.8333
3.95529	0.159253	0.996261	0.159851	0.872999	0.964715	dme-mir-3645,dme-miR-3645-3p	no	miR-3645-3p	3.66667
8.6667	-0.00750967	0.519031	-0.0144687	0.988456	0.988456	dme-mir-3645,dme-miR-3645-5p	no	miR-3645-5p	9.25
601.813	0.365447	0.142932	2.55679	0.0105642	0.0789532	dme-mir-375,dme-miR-375-3p	no	miR-375-3p	623.75
55.1949	-0.589814	0.25964	-2.27166	0.0231073	0.131529	dme-mir-375,dme-miR-375-5p	no	miR-375-5p	60.25
99.1527	0.422384	1.09374	0.386184	0.69936	0.886803	dme-mir-4,dme-miR-4-3p	no	miR-4-3p	103.5
7.55696	0.313987	0.600253	0.52309	0.600911	0.836072	dme-mir-4916,dme-miR-4916-3p	no	miR-4916-3p	7.66667
216.314	1.40049	0.185328	7.55679	4.13123e-14	6.28246e-12	dme-mir-4919,dme-miR-4919-3p	p<.05 FC>2	miR-4919-3p	213.333
9.41005	-1.28455	0.68272	-1.88151	0.0599021	0.261726	dme-mir-4940,dme-miR-4940-5p	FC>2	miR-4940-5p	10.3333
5.64641	-0.638041	0.736606	-0.866189	0.386386	0.754966	dme-mir-4943,dme-miR-4943-3p	no	miR-4943-3p	6.5
8.82673	-0.0118411	0.549853	-0.0215349	0.982819	0.988456	dme-mir-4949,dme-miR-4949-3p	no	miR-4949-3p	9.58333
12.7384	-0.311424	0.480644	-0.647931	0.51703	0.796258	dme-mir-4949,dme-miR-4949-5p	no	miR-4949-5p	13.25
13.0401	0.860977	0.468582	1.83741	0.0661498	0.280396	dme-mir-4951,dme-miR-4951-3p	no	miR-4951-3p	13.8333
266.489	-0.172521	0.195223	-0.883711	0.376852	0.750514	dme-mir-4951,dme-miR-4951-5p	no	miR-4951-5p	278.583
5.3776	0.161277	0.675883	0.238617	0.811402	0.940011	dme-mir-4952,dme-miR-4952-3p	no	miR-4952-3p	5.66667
3.10733	0.486803	1.00003	0.486786	0.62641	0.847145	dme-mir-4956,dme-miR-4956-5p	no	miR-4956-5p	3.33333
47.8683	-0.353414	0.273048	-1.29433	0.195551	0.525802	dme-mir-4960,dme-miR-4960-3p	no	miR-4960-3p	49.5
16.052	-0.173335	0.437321	-0.396356	0.691843	0.886803	dme-mir-4961,dme-miR-4961-5p	no	miR-4961-5p	17.75
41.7927	0.206427	0.517509	0.398886	0.689978	0.886803	dme-mir-4962,dme-miR-4962-3p	no	miR-4962-3p	39.0833
76.6683	0.0630536	0.532808	0.118342	0.905797	0.974417	dme-mir-4962,dme-miR-4962-5p	no	miR-4962-5p	73
14.2027	0.388131	0.405507	0.957151	0.338491	0.729534	dme-mir-4963,dme-miR-4963-3p	no	miR-4963-3p	14.6667
6.63429	0.460814	0.60488	0.761827	0.446163	0.796258	dme-mir-4964,dme-miR-4964-3p	no	miR-4964-3p	6.58333
46.0485	-0.226823	0.322608	-0.70309	0.482	0.796258	dme-mir-4969,dme-miR-4969-5p	no	miR-4969-5p	50.9167
2.99172	0.118216	0.982253	0.120352	0.904205	0.974417	dme-mir-4972,dme-miR-4972-5p	no	miR-4972-5p	3.25
9.28881	-0.372252	0.668267	-0.557041	0.577499	0.832537	dme-mir-4973,dme-miR-4973-5p	no	miR-4973-5p	10.5
45.0152	-0.590103	0.343925	-1.71579	0.086201	0.31386	dme-mir-4975,dme-miR-4975-5p	no	miR-4975-5p	48.25
23.51	1.34271	0.498022	2.69608	0.00701614	0.0588965	dme-mir-4976,dme-miR-4976-5p	FC>2	miR-4976-5p	21.25
3.77152	-0.0346442	0.909518	-0.0380908	0.969615	0.988456	dme-mir-4982,dme-miR-4982-3p	no	miR-4982-3p	3.75
38.9448	0.0607456	0.29734	0.204297	0.838122	0.951628	dme-mir-4984,dme-miR-4984-3p	no	miR-4984-3p	42.0833
6.05485	-2.08024	0.952359	-2.1843	0.0289404	0.152205	dme-mir-4985,dme-miR-4985-5p	FC>2	miR-4985-5p	7
5.05618	0.587973	0.785374	0.748654	0.454066	0.796258	dme-mir-4986,dme-miR-4986-3p	no	miR-4986-3p	5.08333
7.09989	1.13394	0.653905	1.7341	0.0829002	0.31386	dme-mir-5,dme-miR-5-3p	FC>2	miR-5-3p	7.41667
326.615	-0.0235463	0.818207	-0.0287779	0.977042	0.988456	dme-mir-5,dme-miR-5-5p	no	miR-5-5p	334.417
780.273	-0.0116902	0.731233	-0.0159869	0.987245	0.988456	dme-mir-6-1,dme-miR-6-3p	no	miR-6-3p	804.917
780.273	-0.0116902	0.731233	-0.0159869	0.987245	0.988456	dme-mir-6-1,dme-miR-6-3p	no	miR-6-3p	805
780.273	-0.0116902	0.731233	-0.0159869	0.987245	0.988456	dme-mir-6-2,dme-miR-6-3p	no	miR-6-3p	804.917
780.273	-0.0116902	0.731233	-0.0159869	0.987245	0.988456	dme-mir-6-2,dme-miR-6-3p	no	miR-6-3p	805
780.328	-0.0120307	0.731125	-0.016455	0.986871	0.988456	dme-mir-6-3,dme-miR-6-3p	no	miR-6-3p	804.917
780.328	-0.0120307	0.731125	-0.016455	0.986871	0.988456	dme-mir-6-3,dme-miR-6-3p	no	miR-6-3p	805
74.4986	-0.386283	0.286516	-1.34821	0.177592	0.514008	dme-mir-7,dme-miR-7-3p	no	miR-7-3p	82.8333
223255	0.133741	0.184984	0.722982	0.469691	0.796258	dme-mir-7,dme-miR-7-5p	no	miR-7-5p	236996
151.052	0.234531	0.211866	1.10698	0.268304	0.649192	dme-mir-79,dme-miR-79-3p	no	miR-79-3p	157.667
78.4487	-0.148741	0.283871	-0.523975	0.600296	0.836072	dme-mir-79,dme-miR-79-5p	no	miR-79-5p	79.25
843572	-0.00957158	0.160971	-0.0594616	0.952584	0.988456	dme-mir-8,dme-miR-8-3p	no	miR-8-3p	907254
201906	0.0457423	0.31623	0.144649	0.884988	0.966445	dme-mir-8,dme-miR-8-5p	no	miR-8-5p	199850
672.23	-0.052103	0.293377	-0.177597	0.859039	0.952997	dme-mir-87,dme-miR-87-3p	no	miR-87-3p	749.583
141.291	-0.412391	0.244772	-1.68479	0.0920283	0.322667	dme-mir-87,dme-miR-87-5p	no	miR-87-5p	153.083
3668.18	-0.424319	0.0953661	-4.44937	8.61239e-06	0.00030574	dme-mir-927,dme-miR-927-3p	p<.05	miR-927-3p	3930.92
61184.6	0.245525	0.128191	1.91531	0.0554533	0.24998	dme-mir-927,dme-miR-927-5p	no	miR-927-5p	63506.8
1663	-0.0302733	0.201718	-0.150078	0.880703	0.965713	dme-mir-929,dme-miR-929-3p	no	miR-929-3p	1733.42
2162.71	0.370341	0.137774	2.68804	0.00718727	0.0588965	dme-mir-929,dme-miR-929-5p	no	miR-929-5p	2284
85.7702	0.81558	0.244658	3.33355	0.000857461	0.00995744	dme-mir-92a,dme-miR-92a-3p	p<.05	miR-92a-3p	89.5833
43.7196	0.0746906	0.400033	0.186711	0.851887	0.951628	dme-mir-92a,dme-miR-92a-5p	no	miR-92a-5p	47.8333
1071	1.01529	0.165535	6.1334	8.6022e-10	6.26112e-08	dme-mir-92b,dme-miR-92b-3p	p<.05 FC>2	miR-92b-3p	1075
1838.21	-0.0920003	0.140473	-0.654932	0.512511	0.796258	dme-mir-932,dme-miR-932-3p	no	miR-932-3p	1924.75
15607.9	0.234029	0.140035	1.67121	0.0946795	0.32516	dme-mir-932,dme-miR-932-5p	no	miR-932-5p	16055.6
24.5608	0.331472	0.346733	0.955986	0.339079	0.729534	dme-mir-9369,dme-miR-9369-3p	no	miR-9369-3p	26.75
22.6244	-0.408649	0.415813	-0.982772	0.32572	0.722691	dme-mir-9370,dme-miR-9370-5p	no	miR-9370-5p	24.9167
16.4159	-2.04508	0.614613	-3.32742	0.000876535	0.00995744	dme-mir-9371,dme-miR-9371-5p	p<.05 FC>2	miR-9371-5p	18.5833
25.9322	-4.34797	1.14361	-3.80199	0.00014354	0.0031358	dme-mir-9372,dme-miR-9372-3p	p<.05 FC>2	miR-9372-3p	30
2.49539	-0.124131	1.80605	-0.0687305	0.945204	0.988456	dme-mir-9372,dme-miR-9372-5p	no	miR-9372-5p	3.08333
8.51798	0.0808994	0.575338	0.140612	0.888177	0.966445	dme-mir-9373,dme-miR-9373-3p	no	miR-9373-3p	9.08333
10.1389	-1.05492	0.725462	-1.45414	0.145909	0.460423	dme-mir-9375,dme-miR-9375-3p	FC>2	miR-9375-3p	11.25
5.14171	-1.88957	1.04263	-1.81232	0.0699373	0.287858	dme-mir-9375,dme-miR-9375-5p	FC>2	miR-9375-5p	5.66667
10.8596	-0.155911	0.526617	-0.296062	0.767183	0.919325	dme-mir-9378,dme-miR-9378-5p	no	miR-9378-5p	11.25
13.8122	-0.010777	0.553479	-0.0194713	0.984465	0.988456	dme-mir-9381,dme-miR-9381-3p	no	miR-9381-3p	13.25
2.95761	-1.96075	1.13945	-1.72078	0.0852899	0.31386	dme-mir-9381,dme-miR-9381-5p	FC>2	miR-9381-5p	3.25
6.35286	-0.535194	0.75954	-0.704628	0.481042	0.796258	dme-mir-9382,dme-miR-9382-3p	no	miR-9382-3p	6.41667
31.3934	0.46562	0.422267	1.10267	0.270172	0.649192	dme-mir-9383,dme-miR-9383-3p	no	miR-9383-3p	30.1667
5.15077	0.215774	0.762821	0.282863	0.777282	0.923405	dme-mir-9388,dme-miR-9388-3p	no	miR-9388-3p	5.75
101.398	-0.562961	0.249785	-2.25379	0.0242096	0.133941	dme-mir-954,dme-miR-954-3p	no	miR-954-3p	112.833
250.927	-0.130984	0.238218	-0.549851	0.582422	0.835393	dme-mir-954,dme-miR-954-5p	no	miR-954-5p	272.417
5.95678	0.234411	0.772003	0.303639	0.761403	0.919325	dme-mir-955,dme-miR-955-3p	no	miR-955-3p	6.75
100.757	-0.211237	0.247258	-0.854319	0.392928	0.757039	dme-mir-955,dme-miR-955-5p	no	miR-955-5p	110.083
461.541	1.12624	1.30497	0.863038	0.388117	0.754966	dme-mir-956,dme-miR-956-3p	FC>2	miR-956-3p	462.75
66053.8	-0.101807	0.174357	-0.583899	0.559288	0.82728	dme-mir-957,dme-miR-957-3p	no	miR-957-3p	71480.8
217.276	0.189627	0.136672	1.38746	0.165303	0.499425	dme-mir-957,dme-miR-957-5p	no	miR-957-5p	230.667
9.21849	1.18826	0.606651	1.95872	0.0501457	0.233962	dme-mir-960,dme-miR-960-3p	FC>2	miR-960-3p	9
5.15879	0.962098	0.7205	1.33532	0.181772	0.514008	dme-mir-960,dme-miR-960-5p	no	miR-960-5p	5.66667
9.28436	1.01694	0.568977	1.78731	0.0738872	0.29397	dme-mir-961,dme-miR-961-5p	FC>2	miR-961-5p	9.5
7.02003	1.51548	0.712153	2.12803	0.0333348	0.172129	dme-mir-962,dme-miR-962-5p	FC>2	miR-962-5p	6.33333
11.5122	1.68771	0.576131	2.92938	0.00339639	0.0311153	dme-mir-963,dme-miR-963-3p	p<.05 FC>2	miR-963-3p	12.3333
32.008	1.3163	0.358235	3.67439	0.000238415	0.00423186	dme-mir-964,dme-miR-964-5p	p<.05 FC>2	miR-964-5p	33.25
20.6221	0.141357	0.389367	0.363043	0.716573	0.900472	dme-mir-965,dme-miR-965-3p	no	miR-965-3p	21.6667
3436.35	-0.483904	0.139786	-3.46175	0.000536678	0.00741277	dme-mir-965,dme-miR-965-5p	p<.05	miR-965-5p	3753.58
28.9895	0.249246	0.388811	0.641046	0.521493	0.796258	dme-mir-966,dme-miR-966-5p	no	miR-966-5p	30.5833
27.3379	1.21708	0.368661	3.30136	0.000962156	0.0101205	dme-mir-967,dme-miR-967-3p	p<.05 FC>2	miR-967-3p	27.6667
47.1466	-0.174913	0.257852	-0.678345	0.497553	0.796258	dme-mir-967,dme-miR-967-5p	no	miR-967-5p	50.8333
543.736	-0.565953	0.34052	-1.66203	0.0965074	0.326287	dme-mir-969,dme-miR-969-3p	no	miR-969-3p	552.083
56.3338	0.31751	0.260044	1.22099	0.222091	0.57105	dme-mir-969,dme-miR-969-5p	no	miR-969-5p	60.9167
10484.9	0.0996677	0.11116	0.896618	0.369923	0.750514	dme-mir-970,dme-miR-970-3p	no	miR-970-3p	11124.2
928.026	-0.0664691	0.16559	-0.401407	0.68812	0.886803	dme-mir-970,dme-miR-970-5p	no	miR-970-5p	985.25
51.3732	0.207258	0.342572	0.605005	0.545176	0.819511	dme-mir-971,dme-miR-971-3p	no	miR-971-3p	55.1667
8.61267	-0.456335	0.556227	-0.820411	0.411982	0.769755	dme-mir-971,dme-miR-971-5p	no	miR-971-5p	9.66667
3.10226	-0.283037	0.944843	-0.29956	0.764513	0.919325	dme-mir-972,dme-miR-972-3p	no	miR-972-3p	3.41667
7.2716	-0.161814	0.580243	-0.278873	0.780342	0.923405	dme-mir-973,dme-miR-973-3p	no	miR-973-3p	7.25
8.72521	-0.558057	0.576034	-0.968791	0.332649	0.729534	dme-mir-974,dme-miR-974-5p	no	miR-974-5p	9.91667
9.88135	-0.171033	0.562635	-0.303985	0.761139	0.919325	dme-mir-975,dme-miR-975-5p	no	miR-975-5p	10.5
6.05933	-0.253717	0.737392	-0.344073	0.730791	0.905495	dme-mir-976,dme-miR-976-3p	no	miR-976-3p	6.41667
6.08394	0.483391	0.708444	0.682328	0.495032	0.796258	dme-mir-979,dme-miR-979-3p	no	miR-979-3p	6.33333
35.1563	0.22759	0.406212	0.560274	0.575293	0.832537	dme-mir-980,dme-miR-980-3p	no	miR-980-3p	36.25
390.852	0.0371429	0.160998	0.230704	0.817545	0.940011	dme-mir-980,dme-miR-980-5p	no	miR-980-5p	416.333
5473.29	-0.249948	0.171338	-1.4588	0.14462	0.460423	dme-mir-981,dme-miR-981-3p	no	miR-981-3p	5870.58
57.9266	-0.605769	0.252165	-2.40228	0.0162934	0.107612	dme-mir-981,dme-miR-981-5p	no	miR-981-5p	63.25
4.34096	0.523375	1.00531	0.520612	0.602637	0.836072	dme-mir-982,dme-miR-982-3p	no	miR-982-3p	5.08333
53.7605	-0.616552	0.3102	-1.98759	0.0468567	0.229436	dme-mir-982,dme-miR-982-5p	no	miR-982-5p	58.6667
6.94925	0.624644	0.612945	1.01909	0.308162	0.694588	dme-mir-983-1,dme-miR-983-3p	no	miR-983-3p	7.41667
138.683	-0.379319	0.216482	-1.7522	0.0797403	0.30603	dme-mir-983-1,dme-miR-983-5p	no	miR-983-5p	149
6.94925	0.624644	0.612945	1.01909	0.308162	0.694588	dme-mir-983-2,dme-miR-983-3p	no	miR-983-3p	7.41667
138.683	-0.379319	0.216482	-1.7522	0.0797403	0.30603	dme-mir-983-2,dme-miR-983-5p	no	miR-983-5p	149
32.0718	-0.0971903	0.375086	-0.259115	0.795547	0.937491	dme-mir-984,dme-miR-984-5p	no	miR-984-5p	34.6667
38.843	0.194061	0.323239	0.600363	0.548264	0.819511	dme-mir-986,dme-miR-986-3p	no	miR-986-3p	41.1667
42.8769	-0.285187	0.263573	-1.082	0.279251	0.65006	dme-mir-986,dme-miR-986-5p	no	miR-986-5p	46.4167
917.216	-0.300845	0.132482	-2.27084	0.0231566	0.131529	dme-mir-987,dme-miR-987-3p	no	miR-987-3p	994.5
34323.4	-0.329557	0.192763	-1.70965	0.0873314	0.313951	dme-mir-987,dme-miR-987-5p	no	miR-987-5p	37379.2
7804.45	0.331172	0.125829	2.63193	0.00849004	0.0669769	dme-mir-988,dme-miR-988-3p	no	miR-988-3p	8020
1196.07	-0.228993	0.132763	-1.72483	0.084559	0.31386	dme-mir-988,dme-miR-988-5p	no	miR-988-5p	1283.17
3259.41	0.0140392	0.131302	0.106923	0.91485	0.980443	dme-mir-990,dme-miR-990-5p	no	miR-990-5p	3458
7869.1	-0.101024	0.145897	-0.692437	0.488663	0.796258	dme-mir-993,dme-miR-993-3p	no	miR-993-3p	8242
524.92	-0.246653	0.276692	-0.891437	0.372695	0.750514	dme-mir-993,dme-miR-993-5p	no	miR-993-5p	536.083
59.4169	0.507749	0.501985	1.01148	0.311785	0.697221	dme-mir-994,dme-miR-994-5p	no	miR-994-5p	59.9167
921.757	0.014036	0.251006	0.055919	0.955406	0.988456	dme-mir-995,dme-miR-995-3p	no	miR-995-3p	960.25
1025.85	-0.271672	0.167885	-1.6182	0.105619	0.352892	dme-mir-995,dme-miR-995-5p	no	miR-995-5p	1075.5
578.806	0.127546	0.164473	0.775483	0.438054	0.796258	dme-mir-996,dme-miR-996-3p	no	miR-996-3p	606
2150.45	-0.355123	0.113416	-3.13114	0.00174126	0.0176614	dme-mir-996,dme-miR-996-5p	p<.05	miR-996-5p	2319.08
6144.38	-0.133822	0.111199	-1.20345	0.228804	0.575047	dme-mir-998,dme-miR-998-3p	no	miR-998-3p	6469.33
163.489	-0.440137	0.187212	-2.351	0.0187228	0.120308	dme-mir-998,dme-miR-998-5p	no	miR-998-5p	179.167
345872	-0.318243	0.170136	-1.87053	0.0614106	0.264252	dme-mir-999,dme-miR-999-3p	no	miR-999-3p	368170
202.788	-0.197881	0.211237	-0.936772	0.348876	0.739408	dme-mir-999,dme-miR-999-5p	no	miR-999-5p	222.417
516.63	0.171566	0.185829	0.923247	0.355878	0.739457	dme-mir-9a,dme-miR-9a-3p	no	miR-9a-3p	553.25
89970.8	0.206734	0.161338	1.28137	0.200063	0.526092	dme-mir-9a,dme-miR-9a-5p	no	miR-9a-5p	94010.9
728.859	0.0502393	0.12738	0.394406	0.693281	0.886803	dme-mir-9b,dme-miR-9b-3p	no	miR-9b-3p	778.833
22741	0.178887	0.149959	1.19291	0.232905	0.58022	dme-mir-9b,dme-miR-9b-5p	no	miR-9b-5p	23948.4
14.8329	-0.15741	0.440953	-0.356976	0.72111	0.902182	dme-mir-9c,dme-miR-9c-3p	no	miR-9c-3p	15.5833
45490.6	0.0382927	0.179768	0.213012	0.831318	0.951628	dme-mir-9c,dme-miR-9c-5p	no	miR-9c-5p	48007.8
6.81632	0.468525	0.680503	0.688498	0.491139	0.796258	dme-mir-iab-4,dme-miR-iab-4-5p	no	miR-iab-4-5p	7.08333
2.70064	0.903693	1.02264	0.883688	0.376865	0.750514	dme-mir-2501,dme-miR-2501-3p	no	miR-2501-3p	2.41667
2.58233	0.690109	0.987785	0.698643	0.484775	0.796258	dme-mir-4942,dme-miR-4942-3p	no	miR-4942-3p	2.5
3.87289	0.766388	0.830939	0.922315	0.356364	0.739457	dme-mir-4950,dme-miR-4950-3p	no	miR-4950-3p	3.75
8.27225	1.27504	2.3822	0.535234	0.592488	0.836072	dme-mir-958,dme-miR-958-3p	FC>2	miR-958-3p	8.25
6.65089	0.269189	1.7846	0.15084	0.880102	0.965713	dme-mir-958,dme-miR-958-5p	no	miR-958-5p	7.83333
2.71285	0.863994	1.33285	0.648231	0.516835	0.796258	dme-mir-4968,dme-miR-4968-5p	no	miR-4968-5p	2.58333
2.62529	3.90912	1.60545	2.4349	0.0148958	0.100724	dme-mir-4914,dme-miR-4914-5p	FC>2	miR-4914-5p	2.08333

## Sheet: DeSeq2_18vs29
baseMean	log2FoldChange	lfcSE	stat	pvalue	padj	name	lfc	names	express
635362	-0.00128592	0.107862	-0.011922	0.990488	0.996962	dme-bantam,dme-bantam-3p	no	bantam-3p	674985
19158.1	0.789121	0.154176	5.1183	3.08306e-07	3.27442e-06	dme-bantam,dme-bantam-5p	p<.05	bantam-5p	20924.5
2323.36	0.205694	0.130251	1.57921	0.114287	0.226684	dme-let-7,dme-let-7-3p	no	let-7-3p	2435.33
140515	-0.283326	0.223429	-1.26808	0.20477	0.350385	dme-let-7,dme-let-7-5p	no	let-7-5p	151070
394126	-0.274384	0.336521	-0.815356	0.414868	0.591572	dme-mir-1,dme-miR-1-3p	no	miR-1-3p	423070
68922.2	-0.367464	0.168377	-2.18239	0.0290804	0.0821722	dme-mir-10,dme-miR-10-3p	no	miR-10-3p	73802.1
26390.9	-0.433353	0.113794	-3.80821	0.000139977	0.000743329	dme-mir-10,dme-miR-10-5p	p<.05	miR-10-5p	27509.9
100.6	-0.669698	0.231478	-2.89314	0.00381416	0.0146845	dme-mir-100,dme-miR-100-3p	p<.05	miR-100-3p	107.583
58564.5	-0.509542	0.118055	-4.31615	1.58776e-05	0.000106311	dme-mir-100,dme-miR-100-5p	p<.05	miR-100-5p	61841.6
404.896	1.03974	0.146721	7.08647	1.3758e-12	3.25958e-11	dme-mir-1000,dme-miR-1000-3p	p<.05 FC>2	miR-1000-3p	437.25
2358.59	-0.696332	0.150718	-4.62009	3.8358e-06	3.0293e-05	dme-mir-1000,dme-miR-1000-5p	p<.05	miR-1000-5p	2438.92
56.735	1.11488	0.278941	3.99683	6.41958e-05	0.000380236	dme-mir-1001,dme-miR-1001-3p	p<.05 FC>2	miR-1001-3p	60
589.117	1.10007	0.174957	6.28765	3.22306e-10	5.22475e-09	dme-mir-1001,dme-miR-1001-5p	p<.05 FC>2	miR-1001-5p	631.917
2.31272	1.62876	1.42109	1.14613	0.25174	0.41463	dme-mir-1002,dme-miR-1002-3p	FC>2	miR-1002-3p	2.33333
526.967	-0.525432	0.274023	-1.91748	0.0551773	0.13277	dme-mir-1003,dme-miR-1003-3p	no	miR-1003-3p	578.75
37.4773	0.662371	0.327441	2.02287	0.0430865	0.108776	dme-mir-1003,dme-miR-1003-5p	no	miR-1003-5p	40.75
1365.83	-0.880426	0.213166	-4.13024	3.62386e-05	0.000227786	dme-mir-1004,dme-miR-1004-3p	p<.05	miR-1004-3p	1410.5
1485.01	-0.878781	0.130605	-6.72855	1.7136e-11	3.76992e-10	dme-mir-1004,dme-miR-1004-5p	p<.05	miR-1004-5p	1576.83
1.97206	1.58723	1.22451	1.29622	0.194901	0.343642	dme-mir-1005,dme-miR-1005-3p	FC>2	miR-1005-3p	2.25
947.126	-0.395905	0.248378	-1.59397	0.110944	0.223338	dme-mir-1006,dme-miR-1006-3p	no	miR-1006-3p	1026.58
31.2169	-0.980848	0.303379	-3.23308	0.00122465	0.00546655	dme-mir-1006,dme-miR-1006-5p	p<.05	miR-1006-5p	31.8333
25.5369	-1.23049	0.336232	-3.65963	0.000252577	0.00129656	dme-mir-1007,dme-miR-1007-3p	p<.05 FC>2	miR-1007-3p	26.5
504.312	0.0115994	0.222756	0.0520722	0.958471	0.977514	dme-mir-1008,dme-miR-1008-5p	no	miR-1008-5p	554.417
154.358	0.544307	0.3072	1.77183	0.0764222	0.171532	dme-mir-1009,dme-miR-1009-3p	no	miR-1009-3p	170.667
24358.2	-0.135291	0.0998957	-1.35432	0.175634	0.321996	dme-mir-1010,dme-miR-1010-3p	no	miR-1010-3p	25790.1
367.364	0.758229	0.195844	3.87159	0.000108127	0.000584266	dme-mir-1010,dme-miR-1010-5p	p<.05	miR-1010-5p	403.167
9.32512	-1.46659	0.575744	-2.5473	0.010856	0.0367433	dme-mir-1011,dme-miR-1011-3p	p<.05 FC>2	miR-1011-3p	9.75
308.426	0.627819	0.202613	3.09862	0.00194425	0.00798439	dme-mir-1012,dme-miR-1012-3p	p<.05	miR-1012-3p	338.917
1904.04	0.208513	0.231306	0.901463	0.367342	0.557347	dme-mir-1012,dme-miR-1012-5p	no	miR-1012-5p	2071.33
1191.42	0.755537	0.118315	6.38579	1.70513e-10	2.91767e-09	dme-mir-1013,dme-miR-1013-3p	p<.05	miR-1013-3p	1300.75
16.0478	-1.3668	0.499432	-2.73671	0.00620563	0.0222248	dme-mir-1015,dme-miR-1015-3p	p<.05 FC>2	miR-1015-3p	14.8333
253.29	-0.329235	0.141596	-2.32517	0.0200629	0.0599939	dme-mir-1016,dme-miR-1016-3p	no	miR-1016-3p	268
40.2222	-0.29491	0.358417	-0.822814	0.410614	0.590977	dme-mir-1016,dme-miR-1016-5p	no	miR-1016-5p	39.5833
4158.82	-0.894388	0.125672	-7.11686	1.10411e-12	2.83389e-11	dme-mir-1017,dme-miR-1017-3p	p<.05	miR-1017-3p	4377.42
180366	0.273475	0.12959	2.1103	0.0348325	0.0932906	dme-mir-11,dme-miR-11-3p	no	miR-11-3p	186987
7892.33	0.114796	0.16078	0.713994	0.475231	0.64766	dme-mir-11,dme-miR-11-5p	no	miR-11-5p	8159.83
9.60846	-0.0544431	0.553462	-0.0983682	0.92164	0.96986	dme-mir-12,dme-miR-12-3p	no	miR-12-3p	10.8333
997.845	-0.674025	0.14455	-4.66292	3.1176e-06	2.5269e-05	dme-mir-12,dme-miR-12-5p	p<.05	miR-12-5p	1061.5
149.631	0.733966	0.293603	2.49986	0.0124242	0.0411468	dme-mir-124,dme-miR-124-3p	p<.05	miR-124-3p	158.333
884.522	0.328468	0.129371	2.53897	0.011118	0.0372211	dme-mir-124,dme-miR-124-5p	p<.05	miR-124-5p	956.083
4738.94	0.291024	0.172266	1.68938	0.091146	0.193607	dme-mir-125,dme-miR-125-3p	no	miR-125-3p	4886.42
53655.2	-0.211455	0.086159	-2.45424	0.0141184	0.0454315	dme-mir-125,dme-miR-125-5p	p<.05	miR-125-5p	56242.6
16687.7	-0.251945	0.161763	-1.55749	0.119354	0.232664	dme-mir-133,dme-miR-133-3p	no	miR-133-3p	17284.7
1500.17	0.952835	0.128366	7.42279	1.1468e-13	3.53215e-12	dme-mir-133,dme-miR-133-5p	p<.05	miR-133-5p	1620.33
3403.68	0.0433722	0.170239	0.254772	0.798899	0.89014	dme-mir-137,dme-miR-137-3p	no	miR-137-3p	3753.75
162.266	-0.462634	0.18156	-2.5481	0.0108311	0.0367433	dme-mir-137,dme-miR-137-5p	p<.05	miR-137-5p	174.5
780.897	-0.554457	0.13899	-3.9892	6.62968e-05	0.000385272	dme-mir-13a,dme-miR-13a-3p	p<.05	miR-13a-3p	825.083
127.417	0.354197	0.297249	1.19158	0.233424	0.390732	dme-mir-13a,dme-miR-13a-5p	no	miR-13a-5p	130.5
388.715	-0.233778	0.123291	-1.89615	0.0579401	0.136121	dme-mir-13b-1,dme-miR-13b-1-5p	no	miR-13b-1-5p	409.667
16277.6	-0.35684	0.0808865	-4.41161	1.02603e-05	7.34922e-05	dme-mir-13b-1,dme-miR-13b-3p	p<.05	miR-13b-3p	16977.5
249.322	-0.331294	0.174996	-1.89315	0.0583377	0.136121	dme-mir-13b-2,dme-miR-13b-2-5p	no	miR-13b-2-5p	258.25
16277.6	-0.35684	0.0808865	-4.41161	1.02603e-05	7.34922e-05	dme-mir-13b-2,dme-miR-13b-3p	p<.05	miR-13b-3p	16977.5
2.01911e+06	0.190751	0.0970536	1.96542	0.0493656	0.121637	dme-mir-14,dme-miR-14-3p	no	miR-14-3p	2.11594e+06
55419.4	0.986316	0.219536	4.49273	7.03169e-06	5.28234e-05	dme-mir-14,dme-miR-14-5p	p<.05	miR-14-5p	58302.7
558185	-0.324456	0.180418	-1.79835	0.0721208	0.163332	dme-mir-184,dme-miR-184-3p	no	miR-184-3p	589518
2501.03	0.58035	0.23297	2.4911	0.0127349	0.0417272	dme-mir-184,dme-miR-184-5p	p<.05	miR-184-5p	2571.92
158.688	-0.0820743	0.260547	-0.315008	0.752756	0.871612	dme-mir-190,dme-miR-190-3p	no	miR-190-3p	173.25
7846.68	-0.831234	0.226483	-3.67019	0.000242371	0.00126526	dme-mir-190,dme-miR-190-5p	p<.05	miR-190-5p	8323
269.923	0.799221	0.140393	5.69273	1.25025e-08	1.60448e-07	dme-mir-193,dme-miR-193-3p	p<.05	miR-193-3p	286.833
10760.4	-0.067047	0.129055	-0.519521	0.603397	0.742661	dme-mir-193,dme-miR-193-5p	no	miR-193-5p	11459.9
19372.2	0.0910676	0.203639	0.447201	0.65473	0.790811	dme-mir-210,dme-miR-210-3p	no	miR-210-3p	20094.9
10759.5	1.83086	0.311802	5.87187	4.309e-09	6.13641e-08	dme-mir-210,dme-miR-210-5p	p<.05 FC>2	miR-210-5p	11033.9
1816.3	1.25833	0.144712	8.69542	3.45558e-18	1.52045e-16	dme-mir-219,dme-miR-219-3p	p<.05 FC>2	miR-219-3p	1984.67
566.838	0.0390226	0.226425	0.172342	0.863169	0.938149	dme-mir-219,dme-miR-219-5p	no	miR-219-5p	584.333
138.783	-1.29511	0.236167	-5.48388	4.16094e-08	4.74655e-07	dme-mir-2279,dme-miR-2279-5p	p<.05 FC>2	miR-2279-5p	146.25
4.23568	-0.257889	0.812491	-0.317405	0.750936	0.871612	dme-mir-2282,dme-miR-2282-3p	no	miR-2282-3p	5
3.09245	-0.868714	1.00938	-0.860643	0.389435	0.579449	dme-mir-2283,dme-miR-2283-3p	no	miR-2283-3p	3.25
14.7975	1.10546	0.516744	2.13928	0.032413	0.0883471	dme-mir-2489,dme-miR-2489-3p	FC>2	miR-2489-3p	16
10.8592	1.03697	0.544574	1.90418	0.0568869	0.135823	dme-mir-2493,dme-miR-2493-3p	FC>2	miR-2493-3p	11.8333
51.7095	-0.0548395	0.322673	-0.169954	0.865047	0.938149	dme-mir-2500,dme-miR-2500-3p	no	miR-2500-3p	54.25
3.24707	-1.51651	0.958951	-1.58142	0.113781	0.226684	dme-mir-2500,dme-miR-2500-5p	FC>2	miR-2500-5p	3.66667
2.46961	-2.08206	1.18592	-1.75565	0.079149	0.17538	dme-mir-2501,dme-miR-2501-5p	FC>2	miR-2501-5p	2.58333
445.16	0.442485	0.229476	1.92824	0.0538253	0.130537	dme-mir-252,dme-miR-252-3p	no	miR-252-3p	455.417
54000.5	-0.000989851	0.132453	-0.00747322	0.994037	0.997275	dme-mir-252,dme-miR-252-5p	no	miR-252-5p	56671.7
2381.04	-0.989336	0.168781	-5.86164	4.58309e-09	6.13735e-08	dme-mir-2535b,dme-miR-2535b-3p	p<.05	miR-2535b-3p	2510.08
252.104	1.2034	0.201475	5.97295	2.33001e-09	3.58822e-08	dme-mir-263a,dme-miR-263a-3p	p<.05 FC>2	miR-263a-3p	270.667
58269.2	-0.157662	0.161392	-0.97689	0.328624	0.513787	dme-mir-263a,dme-miR-263a-5p	no	miR-263a-5p	61316.8
60.2182	0.0602918	0.22647	0.266224	0.790067	0.89014	dme-mir-263b,dme-miR-263b-3p	no	miR-263b-3p	62.5
14787.8	-0.357593	0.164786	-2.17005	0.0300034	0.0840095	dme-mir-263b,dme-miR-263b-5p	no	miR-263b-5p	15075.5
13.0817	1.2519	0.522752	2.39482	0.0166284	0.0512155	dme-mir-274,dme-miR-274-3p	FC>2	miR-274-3p	13.0833
13326.5	-0.391245	0.147565	-2.65134	0.00801721	0.0280602	dme-mir-274,dme-miR-274-5p	p<.05	miR-274-5p	14197.8
26412.8	0.113069	0.132741	0.8518	0.394325	0.583905	dme-mir-275,dme-miR-275-3p	no	miR-275-3p	27416.6
4057.47	0.0530855	0.1804	0.294265	0.768555	0.876722	dme-mir-275,dme-miR-275-5p	no	miR-275-5p	4118.42
2.79588e+06	-0.230449	0.146139	-1.57692	0.114814	0.226684	dme-mir-276a,dme-miR-276a-3p	no	miR-276a-3p	2.89449e+06
1672.26	0.309356	0.19198	1.6114	0.107093	0.218093	dme-mir-276a,dme-miR-276a-5p	no	miR-276a-5p	1701.5
376364	-0.406737	0.143137	-2.84159	0.0044889	0.0166576	dme-mir-276b,dme-miR-276b-3p	p<.05	miR-276b-3p	390555
1672.26	0.309356	0.19198	1.6114	0.107093	0.218093	dme-mir-276b,dme-miR-276b-5p	no	miR-276b-5p	1701.5
251911	-0.0756124	0.125727	-0.601403	0.547571	0.708622	dme-mir-277,dme-miR-277-3p	no	miR-277-3p	259829
8444.38	1.60985	0.197734	8.14148	3.90486e-16	1.50337e-14	dme-mir-277,dme-miR-277-5p	p<.05 FC>2	miR-277-5p	9150.42
27227.1	-0.436108	0.139235	-3.13217	0.00173517	0.007321	dme-mir-278,dme-miR-278-3p	p<.05	miR-278-3p	27877.4
6601.41	0.405139	0.127573	3.17575	0.0014945	0.00648318	dme-mir-278,dme-miR-278-5p	p<.05	miR-278-5p	7048.17
21367	0.254361	0.152978	1.66273	0.0963665	0.201911	dme-mir-279,dme-miR-279-3p	no	miR-279-3p	22856.8
19.4319	0.750159	0.42974	1.74561	0.0808788	0.175427	dme-mir-279,dme-miR-279-5p	no	miR-279-5p	22
17.2748	1.48761	0.421581	3.52865	0.000417692	0.00207499	dme-mir-281-1,dme-miR-281-1-5p	p<.05 FC>2	miR-281-1-5p	19.25
6369.25	0.748949	0.156569	4.78352	1.72255e-06	1.4339e-05	dme-mir-281-1,dme-miR-281-3p	p<.05	miR-281-3p	6824.5
6369.25	0.748949	0.156569	4.78352	1.72255e-06	1.4339e-05	dme-mir-281-1,dme-miR-281-3p	p<.05	miR-281-3p	6828.5
3286.12	1.02195	0.134787	7.58197	3.4034e-14	1.16472e-12	dme-mir-281-2,dme-miR-281-2-5p	p<.05 FC>2	miR-281-2-5p	3544.42
6373.1	0.749831	0.15661	4.78789	1.68541e-06	1.4339e-05	dme-mir-281-2,dme-miR-281-3p	p<.05	miR-281-3p	6824.5
6373.1	0.749831	0.15661	4.78789	1.68541e-06	1.4339e-05	dme-mir-281-2,dme-miR-281-3p	p<.05	miR-281-3p	6828.5
20.7081	0.89153	0.41639	2.14109	0.0322665	0.0883471	dme-mir-282,dme-miR-282-3p	no	miR-282-3p	22.4167
21.348	-0.454808	0.345427	-1.31666	0.187954	0.334623	dme-mir-282,dme-miR-282-5p	no	miR-282-5p	22.0833
100.054	0.19618	0.208491	0.940955	0.346728	0.536644	dme-mir-283,dme-miR-283-3p	no	miR-283-3p	109.083
12237.4	-0.750529	0.135519	-5.53817	3.05641e-08	3.62067e-07	dme-mir-283,dme-miR-283-5p	p<.05	miR-283-5p	12903.7
1060.47	-0.206	0.134764	-1.52859	0.126366	0.243254	dme-mir-284,dme-miR-284-3p	no	miR-284-3p	1126.17
24634.3	-1.45877	0.133811	-10.9017	1.13071e-27	8.70648e-26	dme-mir-284,dme-miR-284-5p	p<.05 FC>2	miR-284-5p	25278.9
1890.6	-0.126975	0.150693	-0.842604	0.39945	0.587448	dme-mir-285,dme-miR-285-3p	no	miR-285-3p	2040.42
1897.3	1.72898	0.143635	12.0373	2.26281e-33	6.85763e-31	dme-mir-285,dme-miR-285-5p	p<.05 FC>2	miR-285-5p	2031.25
330.441	-0.0467985	1.14776	-0.0407738	0.967476	0.983441	dme-mir-286,dme-miR-286-3p	no	miR-286-3p	343.833
224.234	0.329049	0.308644	1.06611	0.286373	0.461795	dme-mir-2a-1,dme-miR-2a-1-5p	no	miR-2a-1-5p	229.917
8441.67	-0.013597	0.157732	-0.0862036	0.931305	0.96986	dme-mir-2a-1,dme-miR-2a-3p	no	miR-2a-3p	8742.25
8441.67	-0.013597	0.157732	-0.0862036	0.931305	0.96986	dme-mir-2a-1,dme-miR-2a-3p	no	miR-2a-3p	8739.5
193.084	1.4403	0.298417	4.82648	1.38968e-06	1.25888e-05	dme-mir-2a-2,dme-miR-2a-2-5p	p<.05 FC>2	miR-2a-2-5p	200.083
8438.71	-0.0139396	0.157574	-0.0884634	0.929508	0.96986	dme-mir-2a-2,dme-miR-2a-3p	no	miR-2a-3p	8742.25
8438.71	-0.0139396	0.157574	-0.0884634	0.929508	0.96986	dme-mir-2a-2,dme-miR-2a-3p	no	miR-2a-3p	8739.5
55.4129	-0.426759	0.228715	-1.8659	0.0620553	0.143707	dme-mir-2b-1,dme-miR-2b-1-5p	no	miR-2b-1-5p	57.5833
7864.64	0.0572327	0.117245	0.488146	0.625446	0.761413	dme-mir-2b-1,dme-miR-2b-3p	no	miR-2b-3p	8351
7864.64	0.0572327	0.117245	0.488146	0.625446	0.761413	dme-mir-2b-1,dme-miR-2b-3p	no	miR-2b-3p	8321.08
6837.67	0.451551	0.216897	2.08187	0.037354	0.0981512	dme-mir-2b-2,dme-miR-2b-2-5p	no	miR-2b-2-5p	7012.08
7835.64	0.0605666	0.117171	0.516907	0.605221	0.742661	dme-mir-2b-2,dme-miR-2b-3p	no	miR-2b-3p	8351
7835.64	0.0605666	0.117171	0.516907	0.605221	0.742661	dme-mir-2b-2,dme-miR-2b-3p	no	miR-2b-3p	8321.08
1165.08	0.769866	0.228204	3.37359	0.000741946	0.00346242	dme-mir-2c,dme-miR-2c-3p	p<.05	miR-2c-3p	1215.75
482.256	1.28171	0.192507	6.65799	2.77603e-11	5.34386e-10	dme-mir-2c,dme-miR-2c-5p	p<.05 FC>2	miR-2c-5p	514.083
57.0062	0.674417	0.560085	1.20413	0.228538	0.384643	dme-mir-3,dme-miR-3-3p	no	miR-3-3p	60.6667
170.664	0.578346	0.167792	3.44681	0.000567245	0.00272987	dme-mir-304,dme-miR-304-3p	p<.05	miR-304-3p	179.333
900.408	-0.420653	0.192449	-2.18578	0.0288313	0.0821722	dme-mir-304,dme-miR-304-5p	no	miR-304-5p	966
6519.59	0.0732604	0.139594	0.524812	0.599714	0.742661	dme-mir-305,dme-miR-305-3p	no	miR-305-3p	6722
53205.5	-0.21681	0.191321	-1.13323	0.25712	0.421238	dme-mir-305,dme-miR-305-5p	no	miR-305-5p	54612.2
10.002	0.909063	0.565008	1.60894	0.10763	0.218093	dme-mir-306,dme-miR-306-3p	no	miR-306-3p	10.9167
2333.37	0.374767	0.197321	1.89928	0.0575281	0.136121	dme-mir-306,dme-miR-306-5p	no	miR-306-5p	2416.42
1383.84	0.0321349	0.170291	0.188706	0.850323	0.928722	dme-mir-307a,dme-miR-307a-3p	no	miR-307a-3p	1452.67
4.21288	-0.160268	0.778665	-0.205824	0.836928	0.917345	dme-mir-307a,dme-miR-307a-5p	no	miR-307a-5p	4.25
26.9059	0.148691	0.419516	0.354434	0.723013	0.853211	dme-mir-308,dme-miR-308-3p	no	miR-308-3p	28.25
16.4139	-0.770309	0.696255	-1.10636	0.26857	0.43767	dme-mir-310,dme-miR-310-3p	no	miR-310-3p	17.3333
2.44709	-0.835902	1.21602	-0.68741	0.491825	0.666603	dme-mir-310,dme-miR-310-5p	no	miR-310-5p	2.58333
23.76	-0.263838	0.680927	-0.38747	0.698409	0.832637	dme-mir-311,dme-miR-311-3p	no	miR-311-3p	24.5833
3.59992	-2.70318	1.1058	-2.44456	0.0145031	0.045581	dme-mir-311,dme-miR-311-5p	p<.05 FC>2	miR-311-5p	3.58333
31.9269	-0.326056	0.579652	-0.562503	0.573773	0.730257	dme-mir-312,dme-miR-312-3p	no	miR-312-3p	34.6667
1.86071	-0.590391	1.19255	-0.495066	0.620554	0.758454	dme-mir-313,dme-miR-313-5p	no	miR-313-5p	2
9.61334	0.144676	1.11466	0.129794	0.89673	0.959003	dme-mir-314,dme-miR-314-3p	no	miR-314-3p	9.41667
25.4836	0.462652	0.424721	1.08931	0.276018	0.44744	dme-mir-315,dme-miR-315-3p	no	miR-315-3p	26.3333
15711.8	-0.358951	0.0709512	-5.05912	4.21185e-07	4.32416e-06	dme-mir-315,dme-miR-315-5p	p<.05	miR-315-5p	16540.6
964.382	-0.184133	0.728842	-0.252637	0.800548	0.89014	dme-mir-316,dme-miR-316-3p	no	miR-316-3p	797.417
378.951	-0.606872	0.213163	-2.84699	0.0044135	0.0165775	dme-mir-316,dme-miR-316-5p	p<.05	miR-316-5p	397.5
35546.3	0.00281141	0.173042	0.0162469	0.987037	0.996746	dme-mir-317,dme-miR-317-3p	no	miR-317-3p	37056.2
19410.7	0.50941	0.228933	2.22515	0.0260712	0.0757541	dme-mir-317,dme-miR-317-5p	no	miR-317-5p	19650.2
144.818	0.0421064	0.401465	0.104882	0.91647	0.96986	dme-mir-318,dme-miR-318-3p	no	miR-318-3p	148.417
217.171	0.378735	0.183543	2.06347	0.0390676	0.100274	dme-mir-31a,dme-miR-31a-3p	no	miR-31a-3p	224.583
31487.5	0.132137	0.137669	0.959816	0.337148	0.524452	dme-mir-31a,dme-miR-31a-5p	no	miR-31a-5p	33438.9
242.528	0.0498469	0.161065	0.309483	0.756954	0.873191	dme-mir-31b,dme-miR-31b-5p	no	miR-31b-5p	254.917
245.969	-0.728954	0.17946	-4.06194	4.86668e-05	0.000299787	dme-mir-33,dme-miR-33-3p	p<.05	miR-33-3p	245.667
47967.2	-1.24788	0.104152	-11.9813	4.45301e-33	6.85763e-31	dme-mir-33,dme-miR-33-5p	p<.05 FC>2	miR-33-5p	48647.4
39259.4	1.54832	0.240543	6.43679	1.22023e-10	2.21076e-09	dme-mir-34,dme-miR-34-3p	p<.05 FC>2	miR-34-3p	41349.3
345094	0.738409	0.130864	5.64255	1.67548e-08	2.06419e-07	dme-mir-34,dme-miR-34-5p	p<.05	miR-34-5p	359728
10.0535	0.329568	0.535467	0.615477	0.53824	0.699922	dme-mir-3642,dme-miR-3642-3p	no	miR-3642-3p	10.8333
1.83042	1.06981	1.3824	0.773876	0.439004	0.617412	dme-mir-3644,dme-miR-3644-3p	FC>2	miR-3644-3p	2.08333
3.95529	-0.473866	1.01646	-0.466191	0.641079	0.777371	dme-mir-3645,dme-miR-3645-3p	no	miR-3645-3p	3.66667
8.6667	-0.925882	0.560886	-1.65075	0.0987896	0.205589	dme-mir-3645,dme-miR-3645-5p	no	miR-3645-5p	9.25
601.813	-0.392914	0.143249	-2.74288	0.00609035	0.0220686	dme-mir-375,dme-miR-375-3p	p<.05	miR-375-3p	623.75
55.1949	1.16271	0.255158	4.55683	5.19309e-06	3.99868e-05	dme-mir-375,dme-miR-375-5p	p<.05 FC>2	miR-375-5p	60.25
99.1527	-0.0284299	1.0933	-0.0260037	0.979254	0.992139	dme-mir-4,dme-miR-4-3p	no	miR-4-3p	103.5
1.60184	1.23732	1.33529	0.926626	0.35412	0.545346	dme-mir-4909,dme-miR-4909-3p	FC>2	miR-4909-3p	1.83333
2.42035	-0.0857537	1.07783	-0.0795612	0.936586	0.97037	dme-mir-4913,dme-miR-4913-3p	no	miR-4913-3p	2.75
7.55696	-2.21806	0.713821	-3.1073	0.00188805	0.00785836	dme-mir-4916,dme-miR-4916-3p	p<.05 FC>2	miR-4916-3p	7.66667
216.314	-2.2742	0.192881	-11.7907	4.36139e-32	4.47769e-30	dme-mir-4919,dme-miR-4919-3p	p<.05 FC>2	miR-4919-3p	213.333
9.41005	2.61609	0.656555	3.98457	6.76025e-05	0.000385585	dme-mir-4940,dme-miR-4940-5p	p<.05 FC>2	miR-4940-5p	10.3333
1.94876	0.244586	1.50585	0.162424	0.870972	0.941261	dme-mir-4941,dme-miR-4941-5p	no	miR-4941-5p	1.66667
5.64641	0.96575	0.729715	1.32346	0.185681	0.332499	dme-mir-4943,dme-miR-4943-3p	no	miR-4943-3p	6.5
2.0305	2.87006	1.36422	2.10381	0.0353952	0.0939804	dme-mir-4943,dme-miR-4943-5p	FC>2	miR-4943-5p	2.25
8.82673	0.363467	0.542329	0.670195	0.502733	0.676165	dme-mir-4949,dme-miR-4949-3p	no	miR-4949-3p	9.58333
12.7384	0.297545	0.483839	0.614968	0.538576	0.699922	dme-mir-4949,dme-miR-4949-5p	no	miR-4949-5p	13.25
13.0401	-0.233975	0.452629	-0.516925	0.605208	0.742661	dme-mir-4951,dme-miR-4951-3p	no	miR-4951-3p	13.8333
266.489	0.845296	0.19361	4.36598	1.26555e-05	8.66202e-05	dme-mir-4951,dme-miR-4951-5p	p<.05	miR-4951-5p	278.583
5.3776	0.14652	0.667189	0.219607	0.826177	0.912052	dme-mir-4952,dme-miR-4952-3p	no	miR-4952-3p	5.66667
2.14712	0.823973	1.25374	0.657209	0.511046	0.684358	dme-mir-4956,dme-miR-4956-3p	no	miR-4956-3p	2.16667
3.10733	0.369539	0.959622	0.385088	0.700172	0.832637	dme-mir-4956,dme-miR-4956-5p	no	miR-4956-5p	3.33333
1.91442	2.01275	1.18756	1.69486	0.0901013	0.192905	dme-mir-4957,dme-miR-4957-5p	FC>2	miR-4957-5p	2.08333
47.8683	0.351165	0.27442	1.27966	0.200665	0.347218	dme-mir-4960,dme-miR-4960-3p	no	miR-4960-3p	49.5
16.052	0.332042	0.436386	0.760891	0.446722	0.625411	dme-mir-4961,dme-miR-4961-5p	no	miR-4961-5p	17.75
41.7927	-0.0376159	0.517148	-0.0727373	0.942015	0.97037	dme-mir-4962,dme-miR-4962-3p	no	miR-4962-3p	39.0833
76.6683	-0.113833	0.533539	-0.213355	0.83105	0.914155	dme-mir-4962,dme-miR-4962-5p	no	miR-4962-5p	73
14.2027	-1.49069	0.449876	-3.31357	0.000921145	0.00423452	dme-mir-4963,dme-miR-4963-3p	p<.05 FC>2	miR-4963-3p	14.6667
6.63429	-1.08687	0.641451	-1.6944	0.0901893	0.192905	dme-mir-4964,dme-miR-4964-3p	FC>2	miR-4964-3p	6.58333
1.84765	0.491015	1.14338	0.429441	0.667602	0.803209	dme-mir-4965,dme-miR-4965-5p	no	miR-4965-5p	2
46.0485	-0.483582	0.331987	-1.45663	0.145219	0.277809	dme-mir-4969,dme-miR-4969-5p	no	miR-4969-5p	50.9167
1.5631	0.390728	1.2821	0.304756	0.760552	0.874068	dme-mir-4972,dme-miR-4972-3p	no	miR-4972-3p	1.83333
2.99172	-0.109089	0.988091	-0.110403	0.912089	0.96986	dme-mir-4972,dme-miR-4972-5p	no	miR-4972-5p	3.25
9.28881	-0.430664	0.692366	-0.622018	0.53393	0.699789	dme-mir-4973,dme-miR-4973-5p	no	miR-4973-5p	10.5
45.0152	-0.105917	0.352263	-0.300675	0.763662	0.874379	dme-mir-4975,dme-miR-4975-5p	no	miR-4975-5p	48.25
23.51	-2.58173	0.536533	-4.81187	1.49525e-06	1.31582e-05	dme-mir-4976,dme-miR-4976-5p	p<.05 FC>2	miR-4976-5p	21.25
1.71546	-0.439963	1.30813	-0.33633	0.736622	0.86266	dme-mir-4979,dme-miR-4979-3p	no	miR-4979-3p	1.83333
1.88578	0.107043	1.44577	0.0740387	0.94098	0.97037	dme-mir-4981,dme-miR-4981-3p	no	miR-4981-3p	2
3.77152	-0.834677	0.963407	-0.86638	0.386282	0.577547	dme-mir-4982,dme-miR-4982-3p	no	miR-4982-3p	3.75
1.75982	0.797231	1.43838	0.554254	0.579405	0.73439	dme-mir-4983,dme-miR-4983-3p	no	miR-4983-3p	2.16667
38.9448	-0.409667	0.304102	-1.34714	0.177936	0.324285	dme-mir-4984,dme-miR-4984-3p	no	miR-4984-3p	42.0833
6.05485	3.16993	0.931212	3.40409	0.000663839	0.00314558	dme-mir-4985,dme-miR-4985-5p	p<.05 FC>2	miR-4985-5p	7
5.05618	-0.421591	0.782894	-0.538503	0.59023	0.742003	dme-mir-4986,dme-miR-4986-3p	no	miR-4986-3p	5.08333
7.09989	-0.488665	0.630337	-0.775244	0.438196	0.617412	dme-mir-5,dme-miR-5-3p	no	miR-5-3p	7.41667
326.615	-0.0553351	0.818335	-0.0676191	0.946089	0.971318	dme-mir-5,dme-miR-5-5p	no	miR-5-5p	334.417
780.273	0.472428	0.731139	0.646153	0.51818	0.684976	dme-mir-6-1,dme-miR-6-3p	no	miR-6-3p	804.917
780.273	0.472428	0.731139	0.646153	0.51818	0.684976	dme-mir-6-1,dme-miR-6-3p	no	miR-6-3p	805
780.273	0.472428	0.731139	0.646153	0.51818	0.684976	dme-mir-6-2,dme-miR-6-3p	no	miR-6-3p	804.917
780.273	0.472428	0.731139	0.646153	0.51818	0.684976	dme-mir-6-2,dme-miR-6-3p	no	miR-6-3p	805
780.328	0.472428	0.731031	0.646248	0.518119	0.684976	dme-mir-6-3,dme-miR-6-3p	no	miR-6-3p	804.917
780.328	0.472428	0.731031	0.646248	0.518119	0.684976	dme-mir-6-3,dme-miR-6-3p	no	miR-6-3p	805
74.4986	0.396499	0.287288	1.38015	0.167542	0.312745	dme-mir-7,dme-miR-7-3p	no	miR-7-3p	82.8333
223255	-0.435199	0.184986	-2.3526	0.0186426	0.0562933	dme-mir-7,dme-miR-7-5p	no	miR-7-5p	236996
151.052	-0.524065	0.214172	-2.44694	0.0144076	0.045581	dme-mir-79,dme-miR-79-3p	p<.05	miR-79-3p	157.667
78.4487	0.499392	0.282265	1.76923	0.0768551	0.171532	dme-mir-79,dme-miR-79-5p	no	miR-79-5p	79.25
843572	-0.558544	0.160972	-3.46983	0.000520786	0.00254606	dme-mir-8,dme-miR-8-3p	p<.05	miR-8-3p	907254
201906	0.4835	0.316229	1.52896	0.126275	0.243254	dme-mir-8,dme-miR-8-5p	no	miR-8-5p	199850
672.23	0.33894	0.293248	1.15582	0.247756	0.410263	dme-mir-87,dme-miR-87-3p	no	miR-87-3p	749.583
141.291	1.76255	0.239321	7.3648	1.77418e-13	4.96771e-12	dme-mir-87,dme-miR-87-5p	p<.05 FC>2	miR-87-5p	153.083
3668.18	0.513055	0.0953821	5.37895	7.49217e-08	8.24138e-07	dme-mir-927,dme-miR-927-3p	p<.05	miR-927-3p	3930.92
61184.6	-0.639386	0.128203	-4.98728	6.12344e-07	6.08393e-06	dme-mir-927,dme-miR-927-5p	p<.05	miR-927-5p	63506.8
1663	-0.116449	0.201854	-0.576897	0.564009	0.723812	dme-mir-929,dme-miR-929-3p	no	miR-929-3p	1733.42
2162.71	-0.559654	0.137971	-4.05631	4.98543e-05	0.000301081	dme-mir-929,dme-miR-929-5p	p<.05	miR-929-5p	2284
85.7702	-0.498272	0.24282	-2.05202	0.0401672	0.102244	dme-mir-92a,dme-miR-92a-3p	no	miR-92a-3p	89.5833
43.7196	-0.396948	0.404376	-0.98163	0.326282	0.512729	dme-mir-92a,dme-miR-92a-5p	no	miR-92a-5p	47.8333
1071	-1.63255	0.166589	-9.79988	1.1272e-22	6.94356e-21	dme-mir-92b,dme-miR-92b-3p	p<.05 FC>2	miR-92b-3p	1075
1838.21	0.191444	0.14049	1.36269	0.17298	0.31903	dme-mir-932,dme-miR-932-3p	no	miR-932-3p	1924.75
15607.9	-0.330282	0.140053	-2.35826	0.0183609	0.0559917	dme-mir-932,dme-miR-932-5p	no	miR-932-5p	16055.6
24.5608	-0.469646	0.351859	-1.33476	0.181956	0.329662	dme-mir-9369,dme-miR-9369-3p	no	miR-9369-3p	26.75
22.6244	1.90419	0.393004	4.84522	1.26473e-06	1.18042e-05	dme-mir-9370,dme-miR-9370-5p	p<.05 FC>2	miR-9370-5p	24.9167
1.51571	0.364379	1.57104	0.231936	0.816588	0.904709	dme-mir-9371,dme-miR-9371-3p	no	miR-9371-3p	1.66667
16.4159	3.50028	0.596397	5.86904	4.38315e-09	6.13641e-08	dme-mir-9371,dme-miR-9371-5p	p<.05 FC>2	miR-9371-5p	18.5833
25.9322	7.51289	1.12116	6.70098	2.07027e-11	4.25096e-10	dme-mir-9372,dme-miR-9372-3p	p<.05 FC>2	miR-9372-3p	30
2.49539	4.19161	1.5413	2.71953	0.00653755	0.0231444	dme-mir-9372,dme-miR-9372-5p	p<.05 FC>2	miR-9372-5p	3.08333
8.51798	1.28033	0.53308	2.40176	0.0163164	0.0507622	dme-mir-9373,dme-miR-9373-3p	FC>2	miR-9373-3p	9.08333
10.1389	1.44622	0.720603	2.00696	0.0447537	0.112066	dme-mir-9375,dme-miR-9375-3p	FC>2	miR-9375-3p	11.25
5.14171	2.86056	1.0218	2.79953	0.00511777	0.0187652	dme-mir-9375,dme-miR-9375-5p	p<.05 FC>2	miR-9375-5p	5.66667
10.8596	-1.22057	0.577909	-2.11205	0.0346823	0.0932906	dme-mir-9378,dme-miR-9378-5p	FC>2	miR-9378-5p	11.25
13.8122	-0.585763	0.570391	-1.02695	0.304444	0.485848	dme-mir-9381,dme-miR-9381-3p	no	miR-9381-3p	13.25
2.95761	1.65535	1.15485	1.43339	0.151748	0.288508	dme-mir-9381,dme-miR-9381-5p	FC>2	miR-9381-5p	3.25
6.35286	1.61334	0.729453	2.21171	0.0269868	0.0776816	dme-mir-9382,dme-miR-9382-3p	FC>2	miR-9382-3p	6.41667
31.3934	-0.847804	0.429712	-1.97296	0.0485	0.120468	dme-mir-9383,dme-miR-9383-3p	no	miR-9383-3p	30.1667
2.2285	-0.899917	1.23285	-0.729951	0.46542	0.642434	dme-mir-9384,dme-miR-9384-5p	no	miR-9384-5p	2.33333
5.15077	-1.00201	0.804814	-1.24502	0.213123	0.362662	dme-mir-9388,dme-miR-9388-3p	FC>2	miR-9388-3p	5.75
101.398	0.749917	0.249415	3.0067	0.002641	0.0104285	dme-mir-954,dme-miR-954-3p	p<.05	miR-954-3p	112.833
250.927	0.722241	0.237019	3.04719	0.00230992	0.00936127	dme-mir-954,dme-miR-954-5p	p<.05	miR-954-5p	272.417
5.95678	0.679816	0.744451	0.913177	0.36115	0.550664	dme-mir-955,dme-miR-955-3p	no	miR-955-3p	6.75
100.757	0.510978	0.246172	2.0757	0.0379221	0.0981512	dme-mir-955,dme-miR-955-5p	no	miR-955-5p	110.083
461.541	-0.777751	1.30489	-0.596029	0.551156	0.710276	dme-mir-956,dme-miR-956-3p	no	miR-956-3p	462.75
66053.8	-0.570283	0.17437	-3.27054	0.00107342	0.00486195	dme-mir-957,dme-miR-957-3p	p<.05	miR-957-3p	71480.8
217.276	-0.25523	0.137716	-1.8533	0.0638387	0.146734	dme-mir-957,dme-miR-957-5p	no	miR-957-5p	230.667
1.80844	-2.16091	1.38559	-1.55956	0.118864	0.232664	dme-mir-959,dme-miR-959-3p	FC>2	miR-959-3p	1.41667
9.21849	-0.984123	0.603004	-1.63203	0.102673	0.212236	dme-mir-960,dme-miR-960-3p	no	miR-960-3p	9
5.15879	-1.59015	0.765226	-2.07802	0.0377077	0.0981512	dme-mir-960,dme-miR-960-5p	FC>2	miR-960-5p	5.66667
9.28436	-1.54571	0.597168	-2.5884	0.00964236	0.0333691	dme-mir-961,dme-miR-961-5p	p<.05 FC>2	miR-961-5p	9.5
7.02003	-0.962229	0.690266	-1.394	0.163318	0.308602	dme-mir-962,dme-miR-962-5p	no	miR-962-5p	6.33333
11.5122	-1.7058	0.581504	-2.93343	0.00335235	0.0130699	dme-mir-963,dme-miR-963-3p	p<.05 FC>2	miR-963-3p	12.3333
32.008	-1.607	0.367077	-4.37783	1.19866e-05	8.3906e-05	dme-mir-964,dme-miR-964-5p	p<.05 FC>2	miR-964-5p	33.25
20.6221	-0.208838	0.393155	-0.531184	0.595291	0.742661	dme-mir-965,dme-miR-965-3p	no	miR-965-3p	21.6667
3436.35	0.401067	0.139852	2.8678	0.00413339	0.0157171	dme-mir-965,dme-miR-965-5p	p<.05	miR-965-5p	3753.58
1.76864	1.88208	1.46067	1.28851	0.197569	0.343793	dme-mir-966,dme-miR-966-3p	FC>2	miR-966-3p	1.83333
28.9895	0.131787	0.384934	0.342362	0.732078	0.860611	dme-mir-966,dme-miR-966-5p	no	miR-966-5p	30.5833
27.3379	-1.4954	0.378036	-3.95571	7.63072e-05	0.00041969	dme-mir-967,dme-miR-967-3p	p<.05 FC>2	miR-967-3p	27.6667
47.1466	-0.180818	0.264038	-0.684817	0.49346	0.666603	dme-mir-967,dme-miR-967-5p	no	miR-967-5p	50.8333
543.736	1.40771	0.339961	4.14081	3.46078e-05	0.000222067	dme-mir-969,dme-miR-969-3p	p<.05 FC>2	miR-969-3p	552.083
56.3338	-0.845988	0.26821	-3.1542	0.00160941	0.00688468	dme-mir-969,dme-miR-969-5p	p<.05	miR-969-5p	60.9167
10484.9	-0.442488	0.111232	-3.97808	6.94744e-05	0.000389057	dme-mir-970,dme-miR-970-3p	p<.05	miR-970-3p	11124.2
928.026	0.0455953	0.165745	0.275093	0.783245	0.889049	dme-mir-970,dme-miR-970-5p	no	miR-970-5p	985.25
51.3732	-0.28744	0.344519	-0.834323	0.404099	0.589369	dme-mir-971,dme-miR-971-3p	no	miR-971-3p	55.1667
8.61267	0.451068	0.559747	0.805843	0.420333	0.596602	dme-mir-971,dme-miR-971-5p	no	miR-971-5p	9.66667
3.10226	0.80491	0.92474	0.870418	0.384072	0.577045	dme-mir-972,dme-miR-972-3p	no	miR-972-3p	3.41667
7.2716	0.0501854	0.588777	0.0852366	0.932073	0.96986	dme-mir-973,dme-miR-973-3p	no	miR-973-3p	7.25
8.72521	-0.15439	0.601035	-0.256873	0.797277	0.89014	dme-mir-974,dme-miR-974-5p	no	miR-974-5p	9.91667
9.88135	-0.0752202	0.572961	-0.131283	0.895551	0.959003	dme-mir-975,dme-miR-975-5p	no	miR-975-5p	10.5
6.05933	-0.0705849	0.753037	-0.0937337	0.925321	0.96986	dme-mir-976,dme-miR-976-3p	no	miR-976-3p	6.41667
2.02119	-2.24891	1.2859	-1.74889	0.0803093	0.175427	dme-mir-978,dme-miR-978-3p	FC>2	miR-978-3p	1.91667
6.08394	-1.39249	0.758293	-1.83635	0.0663056	0.151275	dme-mir-979,dme-miR-979-3p	FC>2	miR-979-3p	6.33333
35.1563	-0.334945	0.409	-0.818936	0.412823	0.591393	dme-mir-980,dme-miR-980-3p	no	miR-980-3p	36.25
390.852	-0.20085	0.161766	-1.24161	0.214381	0.362798	dme-mir-980,dme-miR-980-5p	no	miR-980-5p	416.333
5473.29	-0.0255488	0.171408	-0.149053	0.881512	0.949321	dme-mir-981,dme-miR-981-3p	no	miR-981-3p	5870.58
57.9266	0.886245	0.250584	3.53671	0.00040514	0.00204562	dme-mir-981,dme-miR-981-5p	p<.05	miR-981-5p	63.25
4.34096	-0.570791	1.01213	-0.56395	0.572788	0.730257	dme-mir-982,dme-miR-982-3p	no	miR-982-3p	5.08333
53.7605	0.713264	0.310399	2.2979	0.0215677	0.0637733	dme-mir-982,dme-miR-982-5p	no	miR-982-5p	58.6667
6.94925	-0.507434	0.612729	-0.828154	0.407583	0.589369	dme-mir-983-1,dme-miR-983-3p	no	miR-983-3p	7.41667
138.683	0.217502	0.217924	0.998065	0.318248	0.502669	dme-mir-983-1,dme-miR-983-5p	no	miR-983-5p	149
6.94925	-0.507434	0.612729	-0.828154	0.407583	0.589369	dme-mir-983-2,dme-miR-983-3p	no	miR-983-3p	7.41667
138.683	0.217502	0.217924	0.998065	0.318248	0.502669	dme-mir-983-2,dme-miR-983-5p	no	miR-983-5p	149
32.0718	-0.281952	0.381918	-0.738254	0.46036	0.639769	dme-mir-984,dme-miR-984-5p	no	miR-984-5p	34.6667
38.843	-0.38634	0.327491	-1.1797	0.238121	0.39644	dme-mir-986,dme-miR-986-3p	no	miR-986-3p	41.1667
42.8769	-0.000776499	0.269044	-0.00288614	0.997697	0.997697	dme-mir-986,dme-miR-986-5p	no	miR-986-5p	46.4167
917.216	0.00698062	0.133032	0.0524733	0.958152	0.977514	dme-mir-987,dme-miR-987-3p	no	miR-987-3p	994.5
34323.4	-0.248977	0.192781	-1.2915	0.19653	0.343793	dme-mir-987,dme-miR-987-5p	no	miR-987-5p	37379.2
7804.45	-0.308725	0.125848	-2.45317	0.0141605	0.0454315	dme-mir-988,dme-miR-988-3p	p<.05	miR-988-3p	8020
1196.07	0.137659	0.132979	1.03519	0.300579	0.482178	dme-mir-988,dme-miR-988-5p	no	miR-988-5p	1283.17
3259.41	-0.646667	0.131628	-4.91284	8.97682e-07	8.64019e-06	dme-mir-990,dme-miR-990-5p	p<.05	miR-990-5p	3458
7869.1	-0.12733	0.145949	-0.87243	0.382974	0.577045	dme-mir-993,dme-miR-993-3p	no	miR-993-3p	8242
524.92	0.383653	0.276681	1.38663	0.165556	0.310921	dme-mir-993,dme-miR-993-5p	no	miR-993-5p	536.083
59.4169	0.358293	0.497624	0.720007	0.471521	0.64546	dme-mir-994,dme-miR-994-5p	no	miR-994-5p	59.9167
921.757	-0.065403	0.251134	-0.26043	0.794532	0.89014	dme-mir-995,dme-miR-995-3p	no	miR-995-3p	960.25
1025.85	0.541146	0.167758	3.22575	0.00125642	0.00552826	dme-mir-995,dme-miR-995-5p	p<.05	miR-995-5p	1075.5
578.806	0.218464	0.164091	1.33136	0.183071	0.329743	dme-mir-996,dme-miR-996-3p	no	miR-996-3p	606
2150.45	0.998752	0.113102	8.83057	1.04145e-18	5.3461e-17	dme-mir-996,dme-miR-996-5p	p<.05	miR-996-5p	2319.08
6144.38	0.336737	0.111181	3.02873	0.00245588	0.00982351	dme-mir-998,dme-miR-998-3p	p<.05	miR-998-3p	6469.33
163.489	0.799858	0.186079	4.29848	1.71971e-05	0.000112696	dme-mir-998,dme-miR-998-5p	p<.05	miR-998-5p	179.167
345872	-0.284744	0.170138	-1.67361	0.0942075	0.198739	dme-mir-999,dme-miR-999-3p	no	miR-999-3p	368170
202.788	-0.270895	0.213528	-1.26866	0.204562	0.350385	dme-mir-999,dme-miR-999-5p	no	miR-999-5p	222.417
516.63	-0.0182963	0.185779	-0.0984841	0.921548	0.96986	dme-mir-9a,dme-miR-9a-3p	no	miR-9a-3p	553.25
89970.8	0.0837956	0.161336	0.519385	0.603492	0.742661	dme-mir-9a,dme-miR-9a-5p	no	miR-9a-5p	94010.9
728.859	0.291452	0.127002	2.29486	0.0217409	0.0637733	dme-mir-9b,dme-miR-9b-3p	no	miR-9b-3p	778.833
22741	-0.137712	0.149963	-0.918303	0.35846	0.549283	dme-mir-9b,dme-miR-9b-5p	no	miR-9b-5p	23948.4
14.8329	0.562302	0.434143	1.2952	0.195251	0.343642	dme-mir-9c,dme-miR-9c-3p	no	miR-9c-3p	15.5833
45490.6	0.0989083	0.179768	0.550201	0.582182	0.734885	dme-mir-9c,dme-miR-9c-5p	no	miR-9c-5p	48007.8
6.81632	-0.498844	0.686165	-0.727003	0.467224	0.642434	dme-mir-iab-4,dme-miR-iab-4-5p	no	miR-iab-4-5p	7.08333
2.70064	-1.98977	1.13728	-1.74959	0.0801883	0.175427	dme-mir-2501,dme-miR-2501-3p	FC>2	miR-2501-3p	2.41667
1.5272	0.919439	1.47711	0.622458	0.533641	0.699789	dme-mir-3641,dme-miR-3641-3p	no	miR-3641-3p	1.58333
2.58233	-1.45741	1.06446	-1.36916	0.170951	0.317185	dme-mir-4942,dme-miR-4942-3p	FC>2	miR-4942-3p	2.5
3.87289	-2.01549	0.937665	-2.14947	0.0315969	0.0876742	dme-mir-4950,dme-miR-4950-3p	FC>2	miR-4950-3p	3.75
1.52696	-1.04582	1.41906	-0.736983	0.461133	0.639769	dme-mir-4961,dme-miR-4961-3p	FC>2	miR-4961-3p	1.5
1.86572	0.530357	1.94531	0.272634	0.785134	0.889049	dme-mir-956,dme-miR-956-5p	no	miR-956-5p	2.25
8.27225	-0.776159	2.37793	-0.326402	0.744121	0.868141	dme-mir-958,dme-miR-958-3p	no	miR-958-3p	8.25
6.65089	0.733068	1.77234	0.413615	0.679156	0.81393	dme-mir-958,dme-miR-958-5p	no	miR-958-5p	7.83333
1.80031	0.842297	2.3398	0.359987	0.718857	0.851569	dme-mir-309,dme-miR-309-3p	no	miR-309-3p	1.83333
2.71285	-1.1405	1.35666	-0.840671	0.400533	0.587448	dme-mir-4968,dme-miR-4968-5p	FC>2	miR-4968-5p	2.58333
2.62529	-2.88256	1.48019	-1.94742	0.0514838	0.125849	dme-mir-4914,dme-miR-4914-5p	FC>2	miR-4914-5p	2.08333
