# Supplementary material for: Thermosensitive alternative splicing senses and mediates temperature adaptation in Drosophila
Source: eLife journal article supplement (doi:10.7554/elife.44642), 2019-11-08
Supplement: supp [file elife-44642-supp-v1.zip › elife_poa_e44642_Supplementary_file_5.pdf]

## Key resources table

| Reagent type (species) or resource                 | Designation                | Source or reference                        | Identifiers      | Additional information                                                                                                                                   |
|----------------------------------------------------|----------------------------|--------------------------------------------|------------------|----------------------------------------------------------------------------------------------------------------------------------------------------------|
| Gene ( <i>Drosophila melanogaster</i> )            | <i>timeless (tim)</i>      | NA                                         | FLYB:FBgn0014396 |                                                                                                                                                          |
| Genetic reagent ( <i>Drosophila melanogaster</i> ) | <i>Drosophila yakuba</i>   | Drosophila Species Stock Center (DSSC)     |                  |                                                                                                                                                          |
| Genetic reagent ( <i>Drosophila melanogaster</i> ) | <i>Drosophila simulans</i> | Drosophila Species Stock Center (DSSC)     |                  |                                                                                                                                                          |
| Genetic reagent ( <i>Drosophila melanogaster</i> ) | <i>Drosophila virilis</i>  | Drosophila Species Stock Center (DSSC)     |                  |                                                                                                                                                          |
| Genetic reagent ( <i>Drosophila melanogaster</i> ) | <i>per01</i>               | Bloomington Drosophila Stock Center (BCSC) | FLYB:FBal0013649 |                                                                                                                                                          |
| Genetic reagent ( <i>Drosophila melanogaster</i> ) | <i>tim01</i>               | BDSC                                       | FLYB:FBal0035778 |                                                                                                                                                          |
| Genetic reagent ( <i>Drosophila melanogaster</i> ) | UAS- <i>tim-sc-FLAG</i>    | This paper                                 | NA               | Generated by the site-specific PhiC31 Integration System (BestGene) using the attP on the 3 <sup>rd</sup> chromosome of UAS- <i>tim-sc-FLAG</i> plasmid. |
| Genetic reagent ( <i>Drosophila melanogaster</i> ) | UAS- <i>tim-M-FLAG</i>     | This paper                                 | NA               | Generated by the site-specific PhiC31 Integration System (BestGene) using the attP on the 3 <sup>rd</sup> chromosome of UAS- <i>tim-M-FLAG</i> plasmid.  |
| Genetic reagent ( <i>Drosophila melanogaster</i> ) | UAS- <i>tim-cold-FLAG</i>  | This paper                                 | NA               | Generated by the site-specific PhiC31 Integration System (BestGene)                                                                                      |

|                                                    |                                             |            |    |                                                                                                                                                                      |
|----------------------------------------------------|---------------------------------------------|------------|----|----------------------------------------------------------------------------------------------------------------------------------------------------------------------|
|                                                    |                                             |            |    | using the attP on the 3 <sup>rd</sup> chromosome of UAS- <i>tim-cold-FLAG</i> plasmid.                                                                               |
| Genetic reagent ( <i>Drosophila melanogaster</i> ) | UAS- <i>tim-L-FLAG</i>                      | This paper | NA | Generated by the site-specific PhiC31 Integration System (BestGene) using the attP on the 3 <sup>rd</sup> chromosome of UAS- <i>tim-L-FLAG</i> plasmid.              |
| Genetic reagent ( <i>Drosophila melanogaster</i> ) | <i>w; tim<sup>01</sup>; UAS-tim-sc-FLAG</i> | This paper | NA | <i>UAS-tim-sc-FLAG</i> flies in a <i>tim<sup>01</sup></i> background                                                                                                 |
| Genetic reagent ( <i>Drosophila melanogaster</i> ) | <i>w; tim<sup>01</sup>; UAS-tim-L-FLAG</i>  | This paper | NA | <i>UAS-tim-L-FLAG</i> flies in a <i>tim<sup>01</sup></i> background                                                                                                  |
| Genetic reagent ( <i>Drosophila melanogaster</i> ) | UAS- <i>luciferase-tim-sc 3'UTR</i>         | This paper | NA | Generated by the site-specific PhiC31 Integration System (BestGene) using the attP on the 3 <sup>rd</sup> chromosome of UAS- <i>luciferase-tim-sc 3'UTR</i> plasmid. |
| Genetic reagent ( <i>Drosophila melanogaster</i> ) | UAS- <i>luciferase-tim-M 3'UTR</i>          | This paper | NA | Generated by the site-specific PhiC31 Integration System (BestGene) using the attP on the 3 <sup>rd</sup> chromosome of UAS- <i>luciferase-</i>                      |

|                                                       |                                      |                                     |    |                                                                                                                                                                       |
|-------------------------------------------------------|--------------------------------------|-------------------------------------|----|-----------------------------------------------------------------------------------------------------------------------------------------------------------------------|
|                                                       |                                      |                                     |    | <i>tim-M</i> 3'UTR plasmid.                                                                                                                                           |
| Genetic reagent<br>( <i>Drosophila melanogaster</i> ) | <i>UAS-luciferase-tim-cold</i> 3'UTR | This paper                          | NA | Generated by the site-specific PhiC31 Integration System (BestGene) using the attP on the 3 <sup>rd</sup> chromosome of <i>UAS-luciferase-tim-cold</i> 3'UTR plasmid. |
| Genetic reagent<br>( <i>Drosophila melanogaster</i> ) | <i>UAS-luciferase-tim-L</i> 3'UTR    | This paper                          | NA | Generated by the site-specific PhiC31 Integration System (BestGene) using the attP on the 3 <sup>rd</sup> chromosome of <i>UAS-luciferase-tim-L</i> 3'UTR plasmid.    |
| Genetic reagent<br>( <i>Drosophila melanogaster</i> ) | <i>40A (tim-sc mutant)</i>           | This paper                          | NA | <i>Tim-sc</i> CRISPR mutant                                                                                                                                           |
| Recombinant DNA reagent                               | pMT-Clk                              | lab collection<br>Mezan et al. 2016 | NA |                                                                                                                                                                       |
| Recombinant DNA reagent                               | pAc-per-V5                           | Nawathean et al. 2004               | NA |                                                                                                                                                                       |
| Recombinant DNA reagent                               | pAc-Tim-L-HA                         | Nawathean et al. 2004               | NA |                                                                                                                                                                       |
| Recombinant DNA reagent                               | pAc-Tim-SC-HA                        | This paper                          | NA | Plasmid for overexpression of <i>tim-sc</i> under pAc control                                                                                                         |
| Recombinant DNA reagent                               | UAS-tim-sc-FLAG                      | This paper                          | NA | Plasmid for overexpression of <i>tim-sc</i> tagged with FLAG under UAS control                                                                                        |
| Recombinant DNA reagent                               | UAS-tim-M-FLAG                       | This paper                          | NA | Plasmid for overexpression of <i>tim-M</i>                                                                                                                            |

|                         |                         |            |    |                                                                                       |
|-------------------------|-------------------------|------------|----|---------------------------------------------------------------------------------------|
|                         |                         |            |    | tagged with FLAG under UAS control                                                    |
| Recombinant DNA reagent | UAS-tim-cold-FLAG       | This paper | NA | Plasmid for overexpression of <i>tim-cold</i> tagged with FLAG under UAS control      |
| Recombinant DNA reagent | UAS-tim-L-FLAG          | This paper | NA | Plasmid for overexpression of <i>tim-L</i> tagged with FLAG under UAS control         |
| Recombinant DNA reagent | UAS-luciferase-tim-sc   | This paper | NA | Plasmid for expression of luciferase fused to <i>tim-sc</i> 3'UTR under UAS control   |
| Recombinant DNA reagent | UAS-luciferase-tim-M    | This paper | NA | Plasmid for expression of luciferase fused to <i>tim-M</i> 3'UTR under UAS control    |
| Recombinant DNA reagent | UAS-luciferase-tim-cold | This paper | NA | Plasmid for expression of luciferase fused to <i>tim-cold</i> 3'UTR under UAS control |
| Recombinant DNA reagent | UAS-luciferase-tim-L    | This paper | NA | Plasmid for expression of luciferase fused to <i>tim-L</i> 3'UTR under UAS control    |
| Recombinant DNA reagent | pMT-minigene_control    | This paper | NA | Plasmid containing exon5-intron5-exon6 ( <i>tim-control</i> minigene)                 |

|                                              |                                  |                                                      |                    |                                                               |
|----------------------------------------------|----------------------------------|------------------------------------------------------|--------------------|---------------------------------------------------------------|
| Recombinant DNA reagent                      | pMT-minigene_tim-sc              | This paper                                           | NA                 | Plasmid containing exon10-intron10-exon11 (tim-sc minigene)   |
| Recombinant DNA reagent                      | pMT-minigene_tim-M               | This paper                                           | NA                 | Plasmid containing exon13-intron13-exon14 (tim-M minigene)    |
| Recombinant DNA reagent                      | pMT-minigene_tim-L/cold          | This paper                                           | NA                 | Plasmid containing exon16-intron16-exon17 (tim-cold minigene) |
| Cell line ( <i>Drosophila melanogaster</i> ) | S2c1                             | Laboratory of Michael T. Marr and Rahman et al. 2015 | FLYB: FBBrf0232536 | RRID:CVCL_I Z06                                               |
| Antibody                                     | anti-HA (mouse monoclonal)       | Roche                                                | 12CA5              | 1:1.000                                                       |
| Antibody                                     | anti-GFP (rabbit polyclonal)     | GenScript                                            | A01388             | 1:1.000                                                       |
| Antibody                                     | anti-TUB (mouse monoclonal)      | Sigma                                                | T5168              | 1:40.000                                                      |
| Antibody                                     | goat anti-rabbit-HRP             | Millipore Corp                                       | AP188P             | 1:10.000                                                      |
| Antibody                                     | rabbit anti-mouse-HRP            | Millipore Corp                                       | AP160P             | 1:10.000                                                      |
| Sequence-based reagent                       | <i>TimS</i> Common Forward       | ACTCACCATTCTCTACAACTTCCT                             |                    | Generation of minigenes                                       |
| Sequence-based reagent                       | <i>TimS</i> Exonic Reverse       | CGTTGTTCTTCTTGCTCTGC                                 |                    | Generation of minigenes                                       |
| Sequence-based reagent                       | <i>TimS</i> Intronic Reverse     | AAATCTTCTGAAATCCTTACCAAACG                           |                    | Generation of minigenes                                       |
| Sequence-based reagent                       | <i>TimM</i> Common Forward       | AGCCTTTTGTCTCCTGCTCC                                 |                    | Generation of minigenes                                       |
| Sequence-based reagent                       | <i>TimM</i> Exonic Reverse       | TTCAGTGGCGTCGAAC TTGAG                               |                    | Generation of minigenes                                       |
| Sequence-based reagent                       | <i>TimM</i> Intronic Reverse     | AACTCACGTTTGTCCAGCGG                                 |                    | Generation of minigenes                                       |
| Sequence-based reagent                       | <i>TimCold/RA</i> Common Forward | GACCAGGAGTACAGTGCCATG                                |                    | Generation of minigenes                                       |
| Sequence-based reagent                       | <i>TimCold/RA</i> Exonic Reverse | GATCGTCCTCATCGCTCACAT                                |                    | Generation of minigenes                                       |

|                        |                                    |                                                               |  |                                    |
|------------------------|------------------------------------|---------------------------------------------------------------|--|------------------------------------|
| Sequence-based reagent | <i>TimCold/RA Intronic Reverse</i> | TGTAACCTATGTGCGA CTCGTT                                       |  | Generation of minigenes            |
| Sequence-based reagent | TimCont1 Common Forward            | CAACATGAAGGGTCTG GTACA                                        |  | Generation of minigenes            |
| Sequence-based reagent | <i>TimCont1 Exonic Reverse</i>     | AGAAGAAGTGCGATGT GTCAA                                        |  | Generation of minigenes            |
| Sequence-based reagent | TimCont1 Intronic Reverse          | GTCCTCATAATAATTTTCTATATCAATATCGAC                             |  | Generation of minigenes            |
| Sequence-based reagent | TimCont2 Common Forward            | GCAATTCGGCTAAAACATAAAACAG                                     |  | Generation of minigenes            |
| Sequence-based reagent | TimCont2 Exonic Reverse            | AGATGTGATTGTGGAGCTGC                                          |  | Generation of minigenes            |
| Sequence-based reagent | TimCont2 Intronic Reverse          | GGGGTCAACTGATAACGAAC                                          |  | Generation of minigenes            |
| Sequence-based reagent | CommonF1                           | CTGCGGCCGCTgaaatcggttATGGACTGGT                               |  | Generation of overexpression flies |
| Sequence-based reagent | CommonF2                           | CTGCGGCCGCTgaaatcggttATGGACTGGTTACT                           |  | Generation of overexpression flies |
| Sequence-based reagent | timL_RT                            | ttgtgccgggtgatattaaa                                          |  | Generation of overexpression flies |
| Sequence-based reagent | timL_R1                            | AGGGTACCttgatccTCAGTGATAGTGG                                  |  | Generation of overexpression flies |
| Sequence-based reagent | timL_R2                            | AGGGTACCTCACTTGT CATCGTCATCCTTGTAATCGTGATAGTGGGGCACC          |  | Generation of overexpression flies |
| Sequence-based reagent | timcold_RT                         | catgtgaggcgactgagaa                                           |  | Generation of overexpression flies |
| Sequence-based reagent | timcold_R1                         | AGGGTACCcaatcgcactcacTCACTTTAATTCC                            |  | Generation of overexpression flies |
| Sequence-based reagent | timcold_R2                         | AGGGTACCTCACTTGT CATCGTCATCCTTGTAATCCTTTAATTCCTTCTCTTTTCGTACA |  | Generation of overexpression flies |
| Sequence-based reagent | timM_RT                            | acggatttgattcggttc                                            |  | Generation of                      |

|                           |                                                           |                                                                                            |  |                                                |
|---------------------------|-----------------------------------------------------------|--------------------------------------------------------------------------------------------|--|------------------------------------------------|
|                           |                                                           |                                                                                            |  | overexpressi<br>on flies                       |
| Sequence-based<br>reagent | timM_R1                                                   | AGGGTACCaacggtatatac<br>aTCACCTTTGTGG                                                      |  | Generation<br>of<br>overexpressi<br>on flies   |
| Sequence-based<br>reagent | timM_R2                                                   | AGGGTACCTCACTTGT<br>CATCGTCATCCTTGTA<br>TCCCTTTGTGGAATGAC<br>AAATGG                        |  | Generation<br>of<br>overexpressi<br>on flies   |
| Sequence-based<br>reagent | timSC_RT                                                  | ttagatcaaagattatattgcttata<br>ccc                                                          |  | Generation<br>of<br>overexpressi<br>on flies   |
| Sequence-based<br>reagent | timSC_R1                                                  | AGGGTACctccTTACCAA<br>ACGGTATGCTC                                                          |  | Generation<br>of<br>overexpressi<br>on flies   |
| Sequence-based<br>reagent | timSC_R2                                                  | AGGGTACCTCACTTGT<br>CATCGTCATCCTTGTA<br>TCCCAAACGGTATGCT<br>CCTGGT                         |  | Generation<br>of<br>overexpressi<br>on flies   |
| Sequence-based<br>reagent | w sgRNA-1                                                 | Ge et al. 2016                                                                             |  | Generation<br>of sgRNA<br>guides for<br>CRISPR |
| Sequence-based<br>reagent | tim sgRNA-1                                               | ATTTGTGGACCATAAGA<br>ACA                                                                   |  | Generation<br>of sgRNA<br>guides for<br>CRISPR |
| Sequence-based<br>reagent | tim sgRNA-2                                               | AATGACCAAGGAACAC<br>AACC                                                                   |  | Generation<br>of sgRNA<br>guides for<br>CRISPR |
| Sequence-based<br>reagent | PCR1fwd (w<br>guide-1<br>forward distal)                  | GCGGCCCCGGGTTCGAT<br>TCCCGGCCGATGCAAT<br>ACCATTCCTGCTCTTTG<br>GGTTTTAGAGCTAGAAA<br>TAGCAAG |  | Generation<br>of sgRNA<br>guides for<br>CRISPR |
| Sequence-based<br>reagent | PCR1rev<br>( <i>Tim</i> guide-1<br>reverse<br>complement) | TGTTCTTATGGTCCACA<br>AATTGCACCAGCCGGG<br>AATCGAACCC                                        |  | Generation<br>of sgRNA<br>guides for<br>CRISPR |
| Sequence-based<br>reagent | PCR2fwd<br>( <i>Tim</i> guide-1<br>forward)               | ATTTGTGGACCATAAGA<br>ACAGTTTTAGAGCTAGA<br>AATAGCAAG                                        |  | Generation<br>of sgRNA<br>guides for<br>CRISPR |

|                         |                                                            |                                                                                                                                                                                                               |                                                                   |                                       |
|-------------------------|------------------------------------------------------------|---------------------------------------------------------------------------------------------------------------------------------------------------------------------------------------------------------------|-------------------------------------------------------------------|---------------------------------------|
| Sequence-based reagent  | PCR2rev<br>( <i>Tim</i> guide-2 reverse complement distal) | ATTTTAACTTGCTATTT<br>CTAGCTCTAAAACGGTT<br>GTGTTCCCTTGGTCATTT<br>GCACCAGCCGGAATC<br>GAACCC                                                                                                                     |                                                                   | Generation of sgRNA guides for CRISPR |
| Commercial assay or kit | Protein G Magnetic beads                                   | NEB                                                                                                                                                                                                           | S1430S                                                            |                                       |
| Commercial assay or kit | Dual Luciferase Assay Kit                                  | Promega                                                                                                                                                                                                       | E1910                                                             |                                       |
| Commercial assay or kit | TRIzol                                                     |                                                                                                                                                                                                               |                                                                   |                                       |
| Software, algorithm     | Graphpad Prism v7                                          | Graphpad Software                                                                                                                                                                                             | <a href="https://www.graphpad.com/">https://www.graphpad.com/</a> |                                       |
| Software, algorithm     | Fiji                                                       | NIH                                                                                                                                                                                                           | <a href="#">RRID:SCR_002285</a>                                   |                                       |
| Software, algorithm     | R                                                          | R Core Team (2014). R: A language and environment for statistical computing. R Foundation for Statistical Computing, Vienna, Austria. URL <a href="http://www.R-project.org/">http://www.R-project.org/</a> . |                                                                   |                                       |
| Software, algorithm     | DeSeq2                                                     | <a href="#">Love et al. 2014</a>                                                                                                                                                                              |                                                                   |                                       |
| Software, algorithm     | MetaCycle                                                  | Wu et al. 2016                                                                                                                                                                                                |                                                                   |                                       |
| Software, algorithm     | mFold                                                      | Zuker et al. 2003                                                                                                                                                                                             |                                                                   |                                       |
| Software, algorithm     | Sleep and Circadian Analysis MATLAB Program (SCAMP)        | Donelson et al. 2012                                                                                                                                                                                          |                                                                   |                                       |
