# Supplementary figures and images for: Thermosensitive alternative splicing senses and mediates temperature adaptation in Drosophila
Source: eLife journal article supplement (doi:10.7554/elife.44642), 2019-11-08

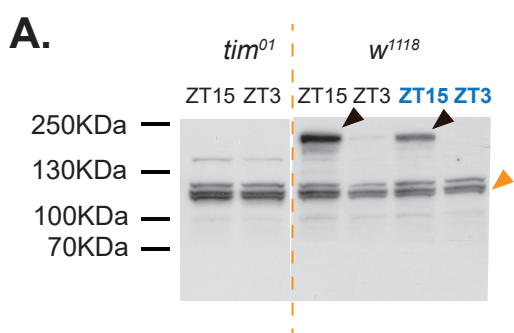

**FIGURE 4 - FIGURE SUPPLEMENT 1**

Supplement: supp [file elife-44642-supp-v1.zip › elife_poa_e44642_Figure_4_figure_supplement_1.pdf]

A.

*Drosophila simulans*

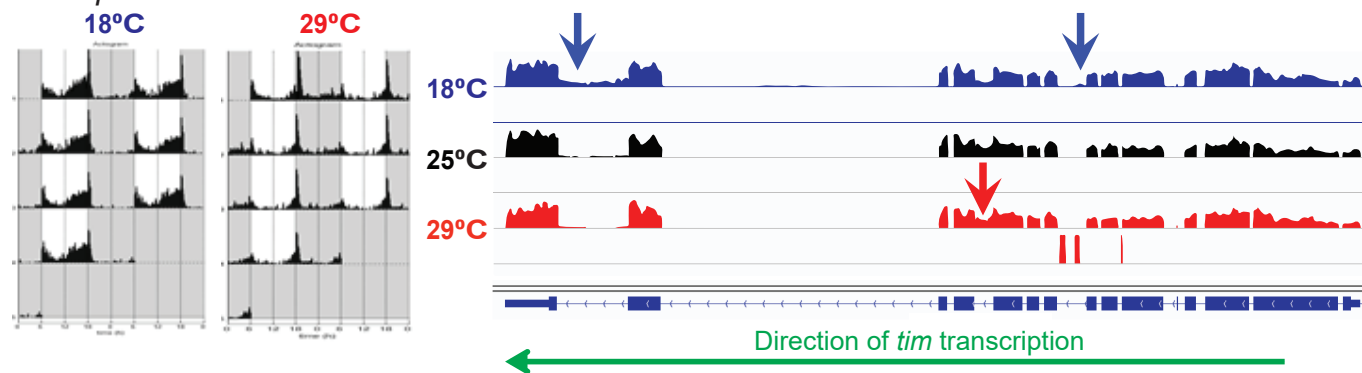

*Drosophila yakuba*

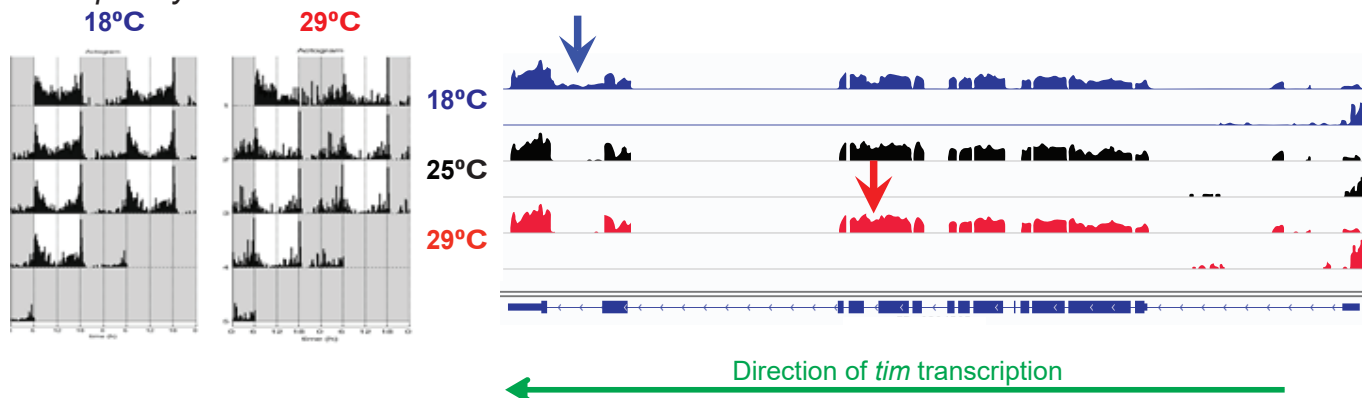

*Drosophila virilis*

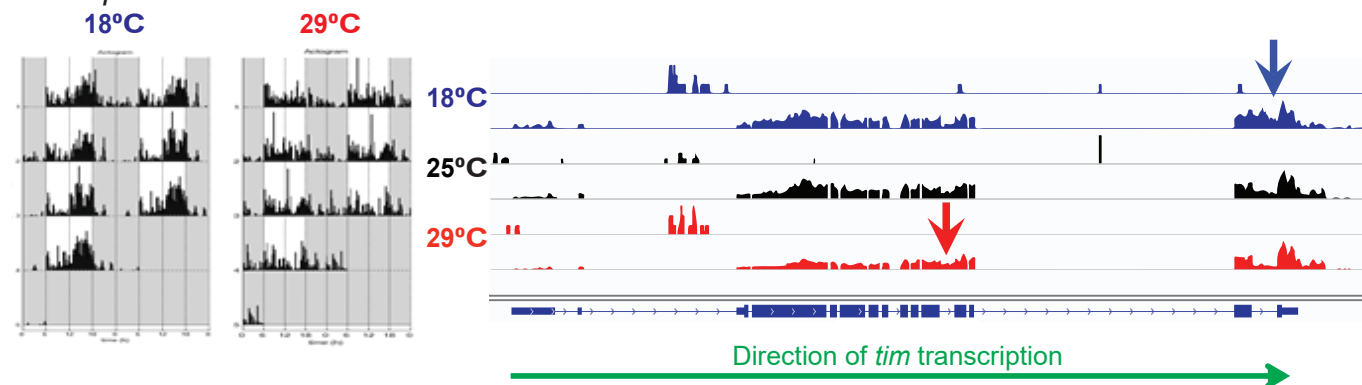

B.

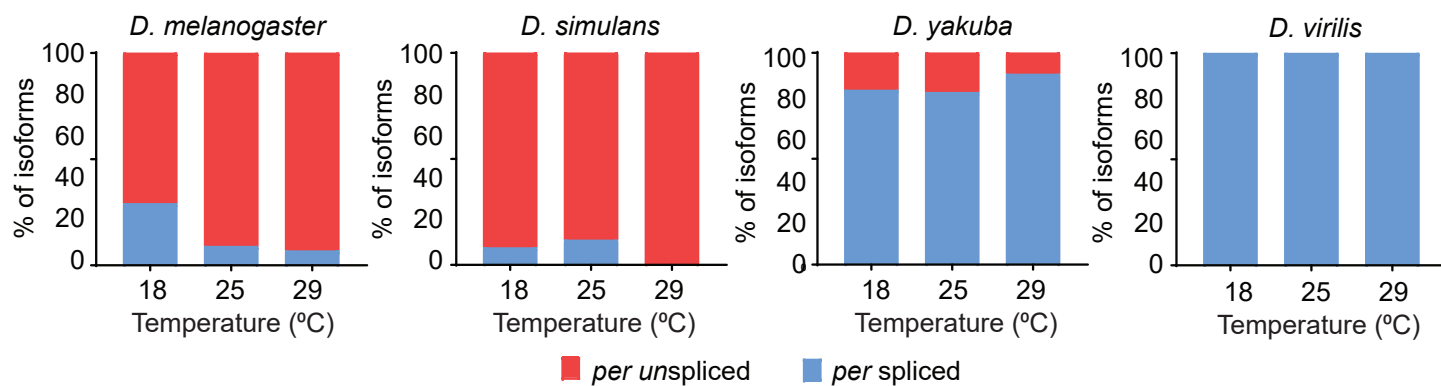

FIGURE 3 - FIGURE SUPPLEMENT 1

Supplement: supp [file elife-44642-supp-v1.zip › elife_poa_e44642_Figure_3_figure_supplement_1.pdf]

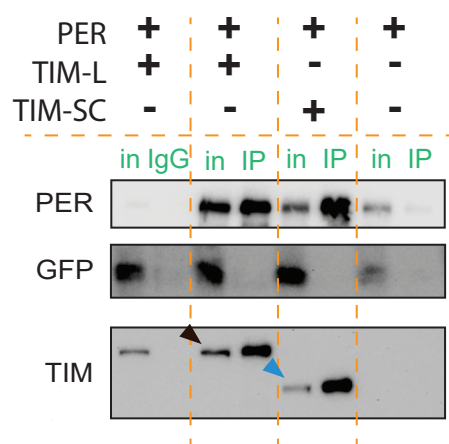

FIGURE 6 - FIGURE SUPPLEMENT 1

Supplement: supp [file elife-44642-supp-v1.zip › elife_poa_e44642_Figure_6_figure_supplement_1.pdf]

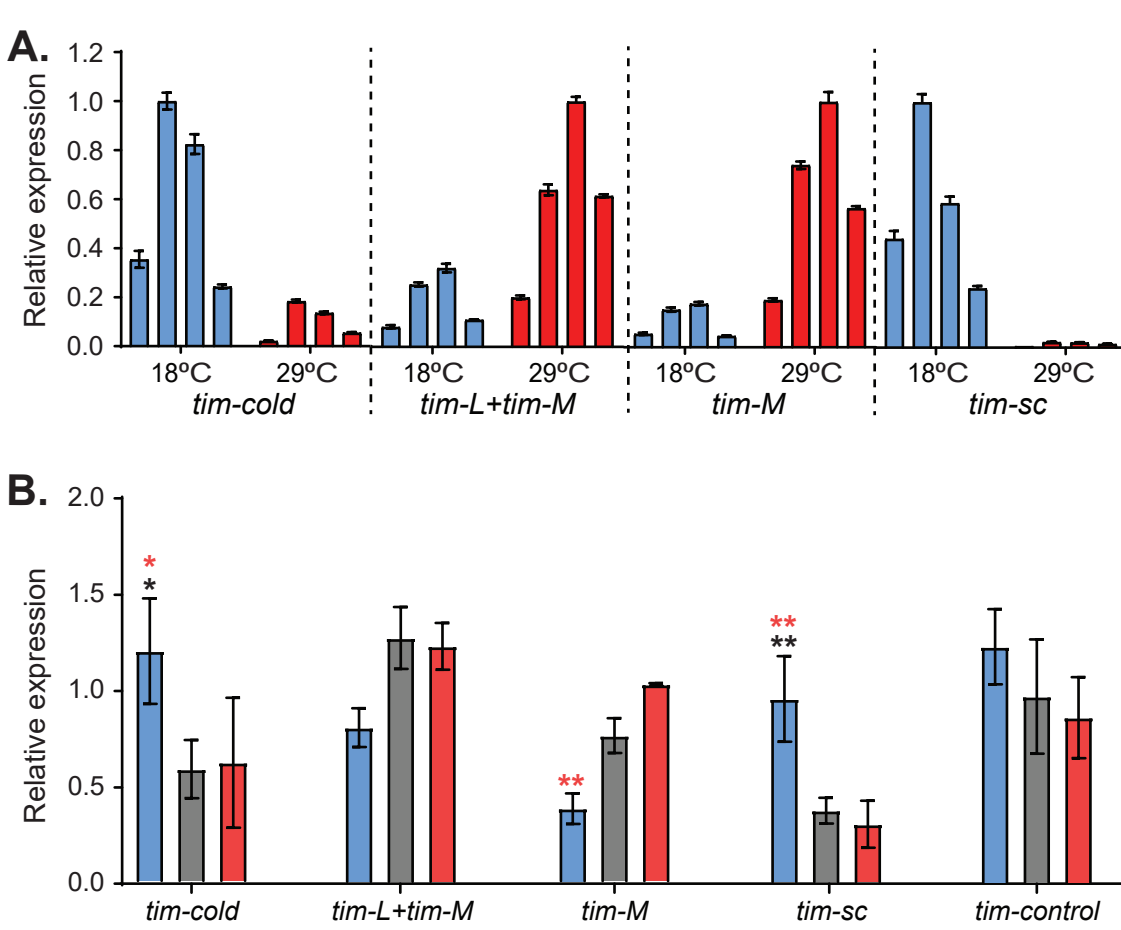

**FIGURE 2 - FIGURE SUPPLEMENT 2**

Supplement: supp [file elife-44642-supp-v1.zip › elife_poa_e44642_Figure_2_figure_supplement_2.pdf]

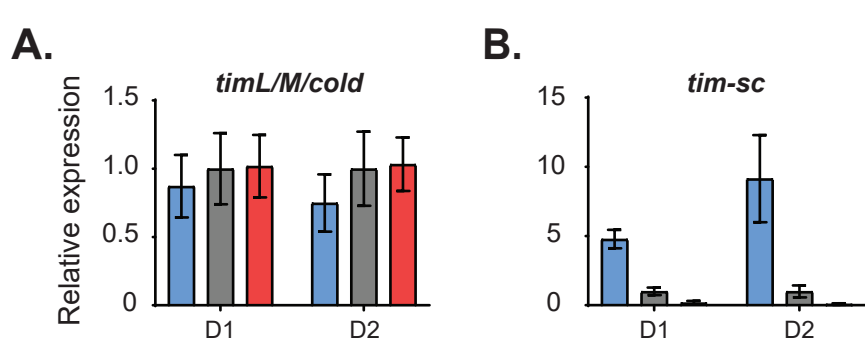

**FIGURE 2 - FIGURE SUPPLEMENT 1**

Supplement: supp [file elife-44642-supp-v1.zip › elife_poa_e44642_Figure_2_figure_supplement_1.pdf]

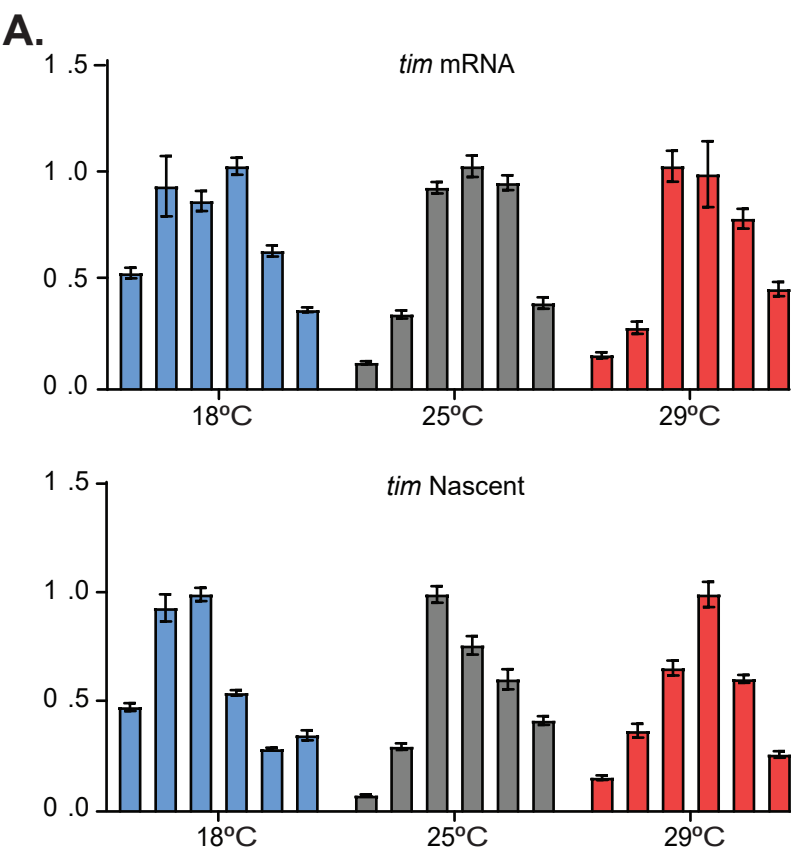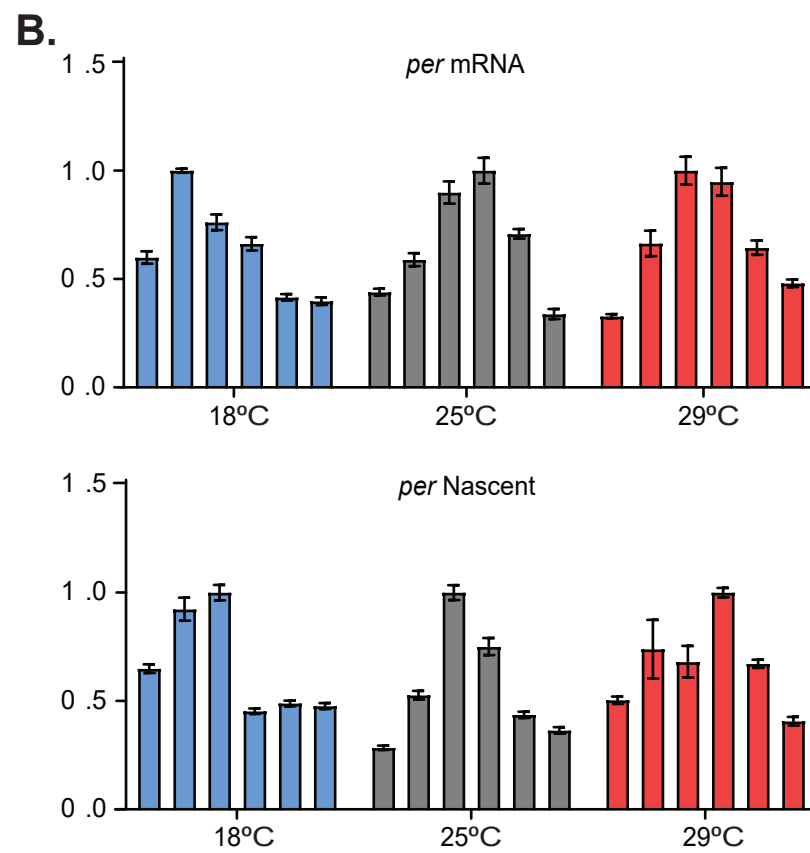

**FIGURE 1 - FIGURE SUPPLEMENT 1**

Supplement: supp [file elife-44642-supp-v1.zip › elife_poa_e44642_Figure_1_figure_supplement_1.pdf]

**A.***tim-sc*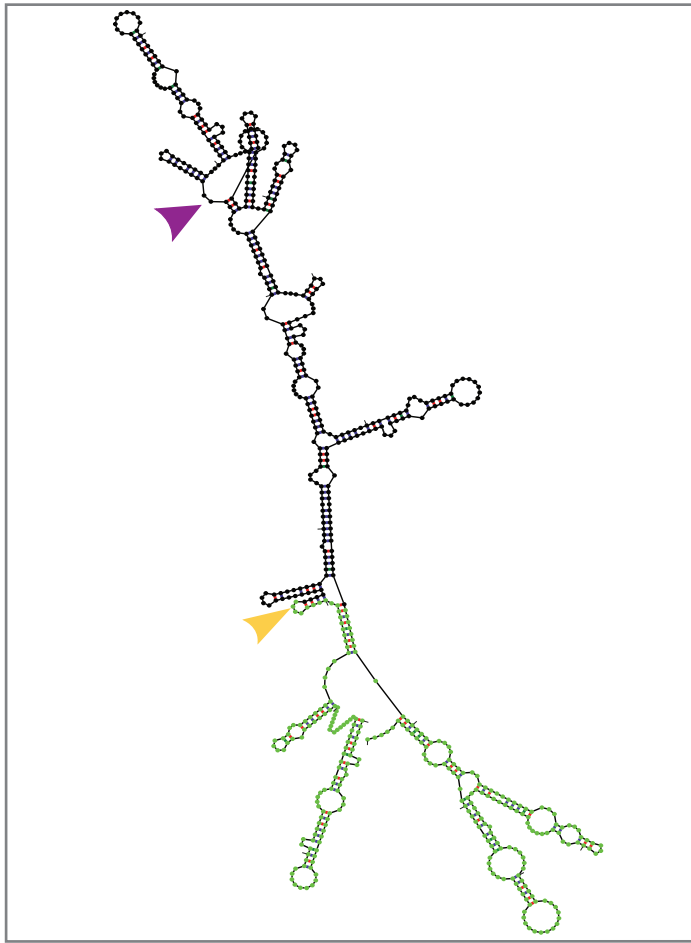**B.***tim-cold*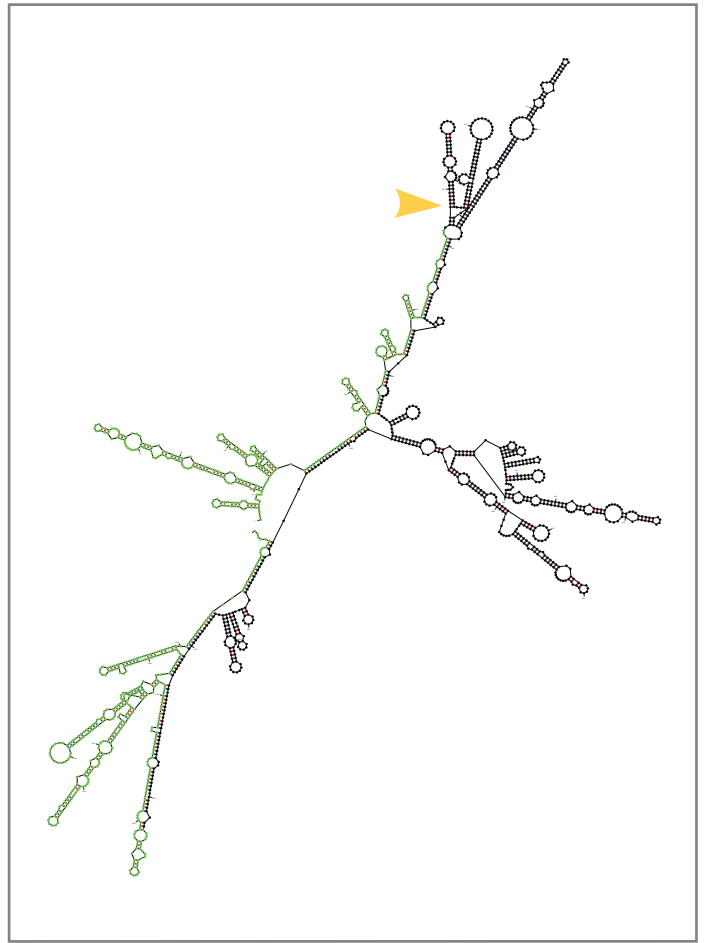**C.***tim-sc* no cleavage and polyadenylation site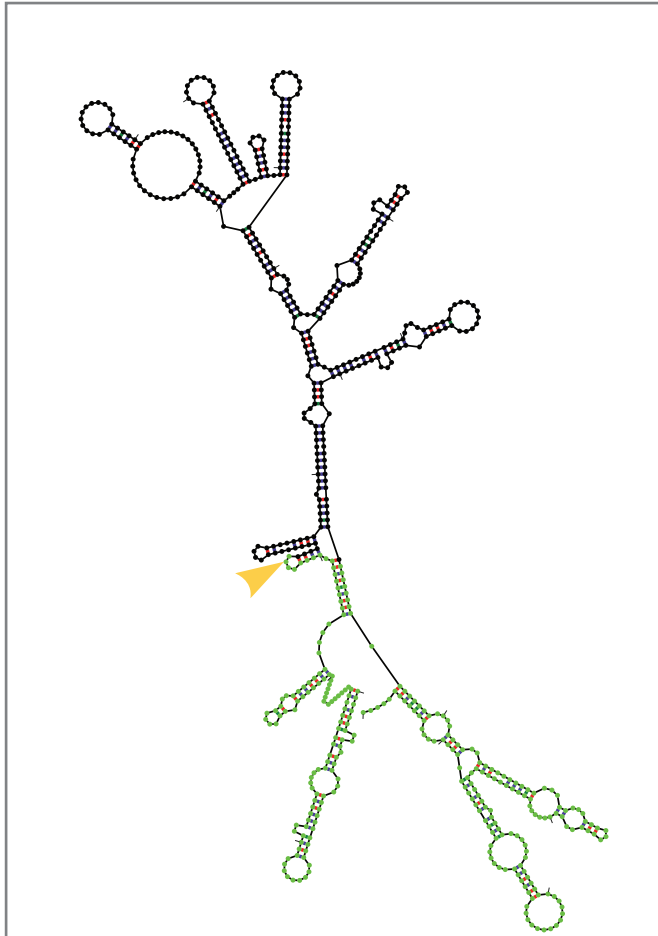**D.***tim-M*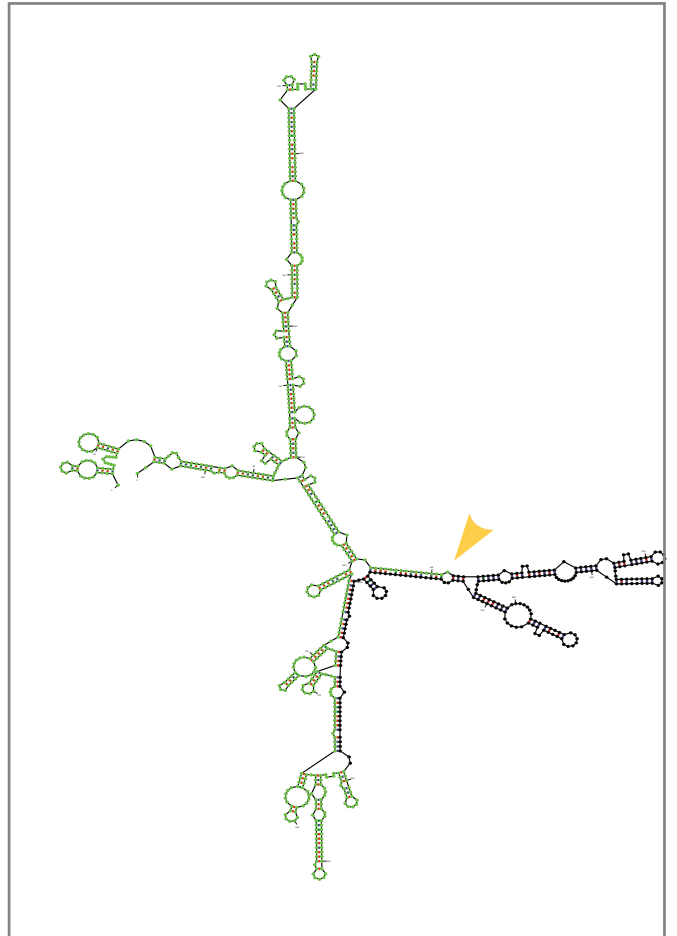**FIGURE 8 - FIGURE SUPPLEMENT 2**

Supplement: supp [file elife-44642-supp-v1.zip › elife_poa_e44642_Figure_8_figure_supplement_2.pdf]

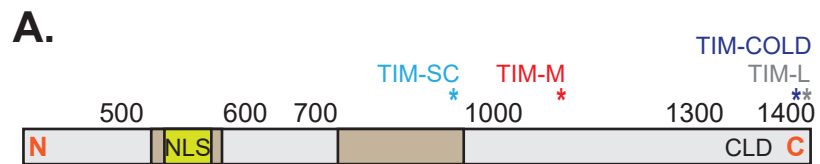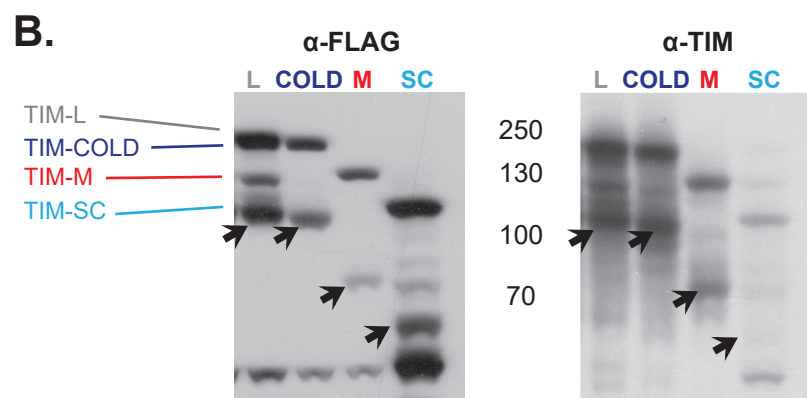

**FIGURE 5 - FIGURE SUPPLEMENT 1**

Supplement: supp [file elife-44642-supp-v1.zip › elife_poa_e44642_Figure_5_figure_supplement_1.pdf]

**A.**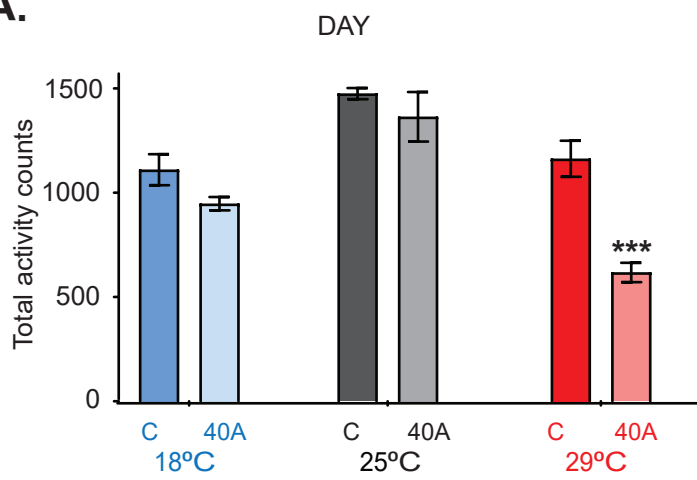**B.**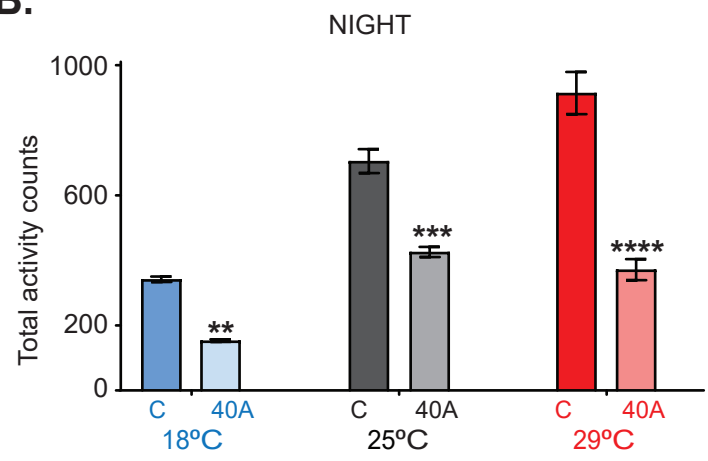**FIGURE 7 - FIGURE SUPPLEMENT 1**

Supplement: supp [file elife-44642-supp-v1.zip › elife_poa_e44642_Figure_7_figure_supplement_1.pdf]

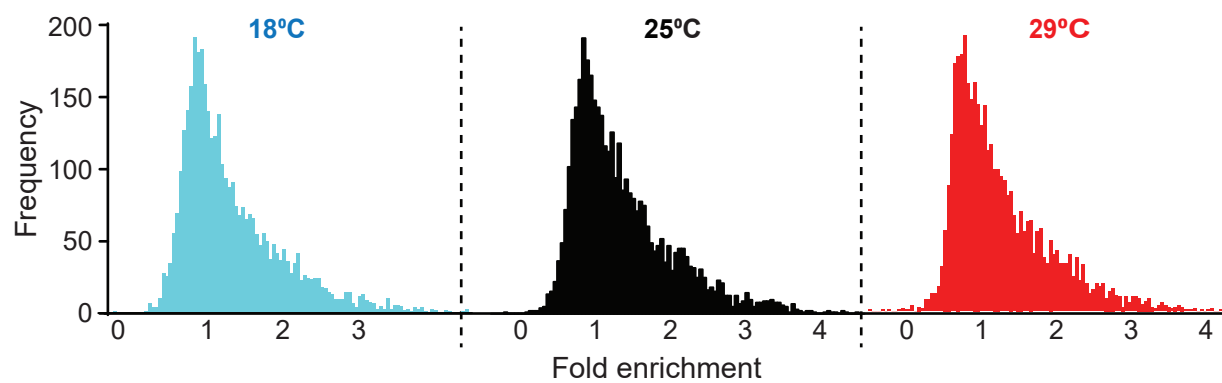

**FIGURE 4 - FIGURE SUPPLEMENT 2**

Supplement: supp [file elife-44642-supp-v1.zip › elife_poa_e44642_Figure_4_figure_supplement_2.pdf]
